# Supplementary material for: Synthesis of functionalized 2-pyridones via Michael addition and cyclization reaction of amines, alkynes and dialkyl acetylene dicarboxylates
Source: Royal Society of Chemistry journal article supplement (doi:10.1039/c3ra43189d), 2013-01-01
Supplement: c3ra43189d.pdf [file c3ra43189d.pdf]

Electronic Supplementary Material (ESI) for RSC Advances

This journal is © The Royal Society of Chemistry 2013

Supporting Information

**Synthesis of functionalized 2-pyridones via Michael  
addition and cyclization reaction of amines, alkynes and  
dialkyl acetylene dicarboxylates**

**Supporting Information**

Qinglei Chong, Xiaoyi Xin, Chunxiang Wang, Fan Wu, Boshun Wan\*

*Dalian Institute of Chemical Physics, Chinese Academy of Sciences,  
457 Zhongshan Road, Dalian 116023, China.*

*E-mail: bswan@dicp.ac.cn*

**Table of Contents**

|                                    |          |
|------------------------------------|----------|
| 1. Experimental section .....      | S2–S3    |
| 2. Analytical Data .....           | S3–S19   |
| 3. Copy of NMR, HRMS Spectra ..... | S20–S126 |
| 4. Crystal Structure of 4aq .....  | S127     |

## EXPERIMENTAL SECTION

**General Considerations.** All reactions were carried out under an atmosphere of argon using standard Schlenk techniques unless otherwise noted. Column chromatography was carried out on silica gel (300–400 mesh) using a forced flow of eluent at 0.3–0.5 bar pressure. For TLC, silica gel GF254 was used and visualized by fluorescence quenching under UV light. Solvents were dried according to the standard procedure and were distilled prior to use.

$^1\text{H}$  NMR,  $^{13}\text{C}$  NMR,  $^{19}\text{F}$  NMR spectra were recorded at 400 MHz spectrometers. The chemical shifts for  $^1\text{H}$  NMR were recorded in ppm downfield from tetramethylsilane (TMS) with the solvent resonance as the internal standard (2.05 ppm for  $\text{CD}_3\text{COCD}_3$  or 7.26 ppm for  $\text{CDCl}_3$ ). The chemical shifts for  $^{13}\text{C}$  NMR were recorded in ppm downfield using the central peak of  $\text{CDCl}_3$  (77.16 ppm) or  $\text{CD}_3\text{COCD}_3$  (29.84 ppm) as the internal standard. Coupling constants ( $J$ ) are reported in Hz and refer to apparent peak multiplications. The abbreviations *s*, *d*, *t*, *q*, and *m* stand for singlet, doublet, triplet, quartet, and multiplet in that order. All  $^{13}\text{C}$  NMR spectra were proton decoupled.

### Experimental Section.

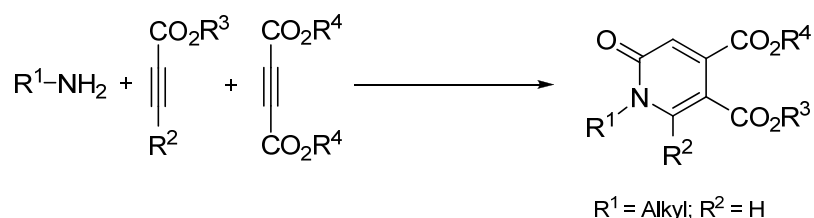

### General Procedure for the Cyclization of Alkynes with Aliphatic Amines.

Terminal alkyne (0.5 mmol for monamine, 1.0 mmol for diamine) and aliphatic

amines (0.5 mmol) were mixed in wet EtOH (2 ml) under argon atmosphere. The solution was stirred at room temperature for 24 h. Subsequently, dialkyl acetylene dicarboxylate (0.5 mmol for monamine, 1.0 mmol for diamine) was added and the solution was stirred at 78 °C under argon atmosphere. After completion of the reaction (as monitored by TLC), the solvent was removed under reduced pressure and the resulting residue was subjected to silica gel chromatography or recrystallized to give the desired product.

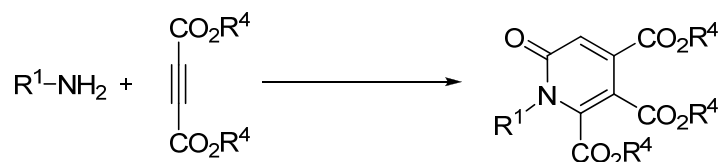

#### General Procedure for the Cyclization of Alkyne with Aromatic Amines.

A solution of aromatic amine (0.5 mmol), dialkyl acetylene dicarboxylate (1 mmol) and wet ethanol (2 mL) were stirred vigorously at room temperature for 10 min. Then the mixture was heated for 24 h. The progress of reaction was monitored by TLC (ether/ethyl acetate = 2:1). The solvent was removed under reduced pressure; the resulting residue was purified by silica gel chromatography. Further purification was done by recrystallization in mixture of ether/ethyl acetate (4:1).

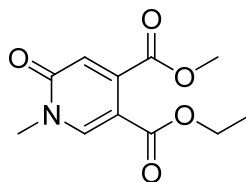

#### Analytical Data

#### 3-Ethyl 4-methyl

**1-methyl-6-oxo-1,6-dihydropyridine-3,4-dicarboxylate (4aa):** white solid; 80.3 mg; 67% yield; mp 146 – 149 °C; <sup>1</sup>H NMR (400 MHz, CDCl<sub>3</sub>) δ 8.10 (s, 1H), 6.47 (s, 1H), 4.22 (s, 2H), 3.84 (s, 3H), 3.53 (s, 3H), 1.26 (s, 3H); <sup>13</sup>C NMR (100 MHz, CDCl<sub>3</sub>) δ 166.7, 163.1, 161.9, 144.3, 144.1, 118.2, 107.3, 63.5, 52.9, 38.2, 14.2; HRMS (Q-TOF,

$m/z$ ) calcd for  $C_{11}H_{13}NO_5Na$   $[M+Na]^+$  262.0691, found 262.0701.

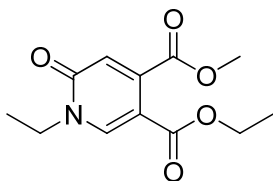

3-Ethyl

4-methyl

**1-ethyl-6-oxo-1,6-dihydropyridine-3,4-dicarboxylate (4ab)**: white solid; 104 mg; 83% yield; mp 67 – 68 °C;  $^1H$  NMR (400 MHz,  $CD_3COCD_3$ )  $\delta$  8.43 (s, 1H), 6.42 (s, 1H), 4.23 (s, 2H), 4.08 (s, 2H), 3.84 (s, 3H), 1.34 (s, 3H), 1.29 (s, 3H);  $^{13}C$  NMR (100 MHz,  $CD_3COCD_3$ )  $\delta$  166.9, 163.5, 161.5, 145.3, 118.4, 107.4, 61.7, 52.9, 46.0, 14.6, 14.4; HRMS (Q-TOF,  $m/z$ ) calcd for  $C_{12}H_{15}NO_5Na$   $[M+Na]^+$  276.0848, found 276.0853.

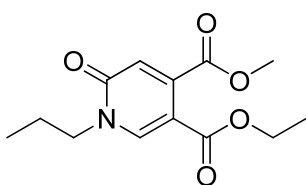

3-Ethyl

4-methyl

**6-oxo-1-propyl-1,6-dihydropyridine-3,4-dicarboxylate (4ac)**: oil; 119 mg; 89% yield;  $^1H$  NMR (400 MHz,  $CD_3COCD_3$ )  $\delta$  8.41 (s, 1H), 6.43 (s, 1H), 4.24 – 4.21 (m, 2H), 4.03 – 4.01 (m, 2H), 3.99 – 3.84 (m, 3H), 1.76 (d,  $J = 7.2$  Hz, 2H), 1.28 (t,  $J = 6.9$  Hz, 3H), 0.94 (t,  $J = 7.3$  Hz, 3H);  $^{13}C$  NMR (100 MHz,  $CD_3COCD_3$ )  $\delta$  167.1, 163.9, 161.6, 145.5, 144.8, 118.5, 107.1, 61.5, 52.9, 52.1, 22.9, 14.4, 11.1; HRMS (Q-TOF,  $m/z$ ) calcd for  $C_{13}H_{17}NO_5Na$   $[M+Na]^+$  290.0997, found 290.1004.

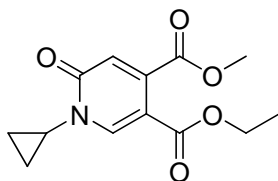

3-Ethyl

4-methyl

**1-cyclopropyl-6-oxo-1,6-dihydropyridine-3,4-dicarboxylate (4ad)**: white solid; 104.6 mg; 79% yield; mp 115 – 116 °C;  $^1H$  NMR (400 MHz,  $CD_3COCD_3$ )  $\delta$  8.20 (s,

1H), 6.39 (s, 1H), 4.24 (q,  $J = 6.5$  Hz, 2H), 3.84 (s, 3H), 3.43 – 3.34 (m, 1H), 1.29 (t,  $J = 6.4$  Hz, 3H), 1.11 (d,  $J = 6.0$  Hz, 2H), 0.98 (s, 2H);  $^{13}\text{C}$  NMR (100 MHz,  $\text{CD}_3\text{COCD}_3$ )  $\delta$  167.4, 164.1, 162.1, 144.8, 144.7, 118.3, 106.7, 61.7, 52.9, 33.6, 14.4, 6.9; HRMS (Q-TOF,  $m/z$ ) calcd for  $\text{C}_{13}\text{H}_{15}\text{NO}_5\text{Na}$   $[\text{M}+\text{Na}]^+$  288.0855, found 288.0848.

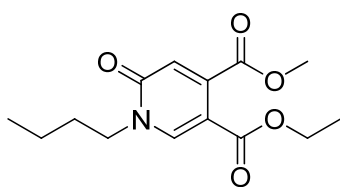

**3-Ethyl**

**4-methyl**

**1-butyl-6-oxo-1,6-dihydropyridine-3,4-dicarboxylate (4ae):** oil; 109.6 mg; 78% yield;  $^1\text{H}$  NMR (400 MHz,  $\text{CD}_3\text{COCD}_3$ )  $\delta$  8.39 (s, 1H), 6.41 (s, 1H), 4.22 (m, 2H), 4.03 (s, 2H), 3.82 (s, 3H), 1.71 (s, 2H), 1.34 (s, 2H), 1.26 (s, 3H), 0.92 (s, 3H);  $^{13}\text{C}$  NMR (100 MHz,  $\text{CD}_3\text{COCD}_3$ )  $\delta$  167.29, 163.9, 160.6, 145.5, 144.8, 118.4, 107.2, 61.7, 52.9, 50.4, 31.8, 20.3, 14.4, 13.9; HRMS (Q-TOF,  $m/z$ ) calcd for  $\text{C}_{14}\text{H}_{19}\text{NO}_5\text{Na}$   $[\text{M}+\text{Na}]^+$  304.1161, found 304.1153.

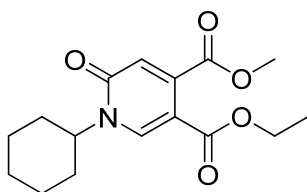

**3-Ethyl**

**4-methyl**

**1-cyclohexyl-6-oxo-1,6-dihydropyridine-3,4-dicarboxylate (4af):** white solid; 106.3 mg; 69% yield; mp 77 – 78 °C;  $^1\text{H}$  NMR (400 MHz,  $\text{CD}_3\text{COCD}_3$ )  $\delta$  8.31 (s, 1H), 6.43 (s, 1H), 4.67-4.70 (t,  $J = 11.7$  Hz, 1H), 4.24 (d,  $J = 3.3$  Hz, 2H), 3.84 (s, 3H), 1.92 (d,  $J = 10.1$  Hz, 4H), 1.70 (t,  $J = 11.3$  Hz, 3H), 1.49 (dd,  $J = 24.3, 12.4$  Hz, 2H), 1.28 (s, 4H);  $^{13}\text{C}$  NMR (100 MHz,  $\text{CD}_3\text{COCD}_3$ )  $\delta$  167.4, 164.4, 161.1, 143.9, 141.5, 118.4, 107.3, 61.7, 56.2, 52.9, 32.4, 26.4, 25.7, 14.4; HRMS (Q-TOF,  $m/z$ ) calcd for

$C_{16}H_{21}NO_5Na$   $[M+Na]^+$  330.1317, found 330.1310.

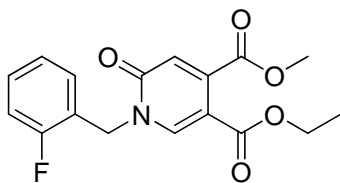

3-Ethyl

4-methyl

**1-(2-fluorobenzyl)-6-oxo-1,6-dihydropyridine-3,4-dicarboxylate (4ag):** white solid;

114.7 mg; 69% yield; mp 106 – 117 °C;  $^1H$  NMR (400 MHz,  $CD_3COCD_3$ )  $\delta$  8.52 (s, 1H), 7.35 (t,  $J$  = 6.4 Hz, 2H), 7.16 (dd,  $J$  = 15.4, 8.1 Hz, 2H), 6.48 (s, 1H), 5.31 (s, 2H), 4.26 (q,  $J$  = 7.1 Hz, 2H), 3.84 (s, 3H), 1.28 – 1.25 (m, 3H);  $^{13}C$  NMR (100 MHz,  $CD_3COCD_3$ )  $\delta$  167.1, 163.8, 163.0, 161.5, 160.2, 145.7, 145.1, 131.1, 131.0, 125.3, 118.7, 116.3, 107.7, 61.8, 52.9, 47.94, 47.90, 14.4;  $^{19}F$  NMR (377 MHz,  $CD_3COCD_3$ )  $\delta$  -119.4; HRMS (Q-TOF,  $m/z$ ) calcd for  $C_{17}H_{16}FNO_5Na$   $[M+Na]^+$  356.0910, found 356.0897.

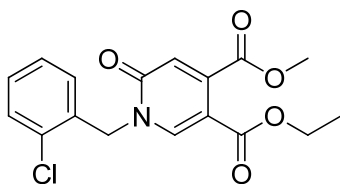

3-Ethyl

4-methyl

**1-(2-chlorobenzyl)-6-oxo-1,6-dihydropyridine-3,4-dicarboxylate (4ah):** white solid;

141.4 mg; 81% yield; mp 114 – 115 °C;  $^1H$  NMR (400 MHz,  $CD_3COCD_3$ )  $\delta$  8.47 (s, 1H), 7.45 (s, 1H), 7.31 (s, 2H), 7.20 (s, 1H), 6.50 (s, 1H), 5.32 (s, 2H), 4.19-4.21 (d,  $J$  = 6.8 Hz, 2H), 3.84 (s, 3H), 1.23 (s, 3H);  $^{13}C$  NMR (100 MHz,  $CD_3COCD_3$ )  $\delta$  166.9, 163.6, 161.4, 145.7, 145.6, 145.2, 134.2, 133.8, 130.49, 130.44, 0, 118.8, 107.6, 61.8, 53.0, 51.2, 14.4; HRMS (Q-TOF,  $m/z$ ) calcd for  $C_{17}H_{16}ClNO_5Na$   $[M+Na]^+$  372.0615, found 372.0631.

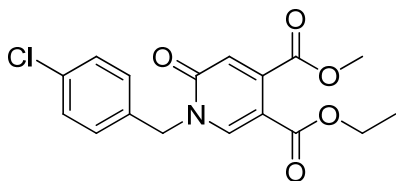

3-Ethyl

4-methyl

**1-(4-chlorobenzyl)-6-oxo-1,6-dihydropyridine-3,4-dicarboxylate (4ai):** white solid; 128.9 mg; 74% yield; mp 132 – 133 °C;  $^1\text{H}$  NMR (400 MHz,  $\text{CD}_3\text{COCD}_3$ )  $\delta$  8.55 (s, 1H), 7.41 (dd,  $J = 19.1, 7.3$  Hz, 4H), 6.50 (s, 1H), 5.27 (s, 2H), 4.23 (d,  $J = 6.0$  Hz, 2H), 3.85 (s, 3H), 1.26 (t,  $J = 6.4$  Hz, 3H);  $^{13}\text{C}$  NMR (100 MHz,  $\text{CD}_3\text{COCD}_3$ )  $\delta$  166.6, 163.6, 161.5, 145.4, 145.1, 136.2, 134.2, 130.7, 129.5, 118.9, 107.9, 61.8, 53.0, 52.5, 14.4; HRMS (Q-TOF,  $m/z$ ) calcd for  $\text{C}_{17}\text{H}_{16}\text{ClNO}_5\text{Na}$   $[\text{M}+\text{Na}]^+$  372.0615, found 372.0631.

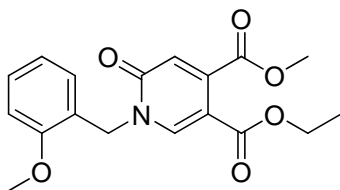

3-Ethyl

4-methyl

**1-(2-methoxybenzyl)-6-oxo-1,6-dihydropyridine-3,4-dicarboxylate (4aj):** white solid; 135.5 mg; 80% yield; mp 119 – 120 °C;  $^1\text{H}$  NMR (400 MHz,  $\text{CD}_3\text{COCD}_3$ )  $\delta$  8.51 (s, 1H), 7.31 (s, 2H), 7.03 (d,  $J = 6.3$  Hz, 1H), 6.93 (s, 1H), 6.43 (s, 1H), 5.16 (s, 2H), 4.23 (d,  $J = 2.4$  Hz, 2H), 3.89 (s, 3H), 3.83 (s, 3H), 1.28 (s, 3H);  $^{13}\text{C}$  NMR (100 MHz,  $\text{CD}_3\text{COCD}_3$ )  $\delta$  167.2, 164.0, 161.6, 158.2, 146.2, 144.5, 131.7, 130.7, 121.3, 118.4, 111.6, 107.2, 61.7, 49.3, 14.4; HRMS (Q-TOF,  $m/z$ ) calcd for  $\text{C}_{18}\text{H}_{19}\text{NO}_6\text{Na}$   $[\text{M}+\text{Na}]^+$  368.1110, found 368.1100.

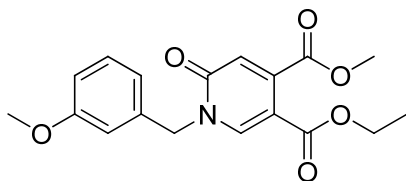

3-Ethyl

4-methyl

**1-(3-methoxybenzyl)-6-oxo-1,6-dihydropyridine-3,4-dicarboxylate (4ak):** white solid; 124.2 mg; 72% yield; mp 66 – 67 °C;  $^1\text{H}$  NMR (400 MHz,  $\text{CD}_3\text{COCD}_3$ )  $\delta$  8.44 (s, 1H), 7.21 (d,  $J = 6.2$  Hz, 1H), 6.93 (d,  $J = 9.9$  Hz, 1H), 6.89 (s, 1H), 6.82 (s, 1H), 6.47 (s, 1H), 5.19 (s, 2H), 4.15 (s, 2H), 3.80 (s, 3H), 3.72 (s, 3H), 1.19 (s, 3H);  $^{13}\text{C}$  NMR (100 MHz,  $\text{CD}_3\text{COCD}_3$ )  $\delta$  167.2, 163.8, 161.6, 160.9, 145.3, 144.9, 138.7, 130.7, 120.8, 118.8, 111.4, 107.8, 61.8, 55.5, 52.9, 52.8, 14.4; HRMS (Q-TOF,  $m/z$ ) calcd for  $\text{C}_{18}\text{H}_{19}\text{NO}_6\text{Na}$   $[\text{M}+\text{Na}]^+$  368.1110, found 368.1100

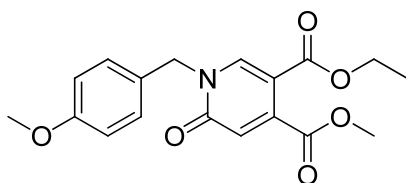

3-Ethyl

4-methyl

**1-(4-methoxybenzyl)-6-oxo-1,6-dihydropyridine-3,4-dicarboxylate (4al):** white solid; 104.3 mg; 61% yield; mp 97 – 98 °C;  $^1\text{H}$  NMR (400 MHz,  $\text{CD}_3\text{COCD}_3$ )  $\delta$  8.43 (s, 1H), 7.31-7.34 (d,  $J = 8.7$  Hz, 2H), 6.84-6.91 (d,  $J = 8.7$  Hz, 2H), 6.44 (s, 1H), 5.13 (s, 2H), 4.14-4.19 (q,  $J = 7.1$  Hz, 2H), 3.79 (s, 3H), 3.72 (s, 3H), 1.18-1.25 (t,  $J = 7.1$  Hz, 3H);  $^{13}\text{C}$  NMR (100 MHz,  $\text{CD}_3\text{COCD}_3$ )  $\delta$  167.2, 163.9, 161.7, 160.5, 145.1, 144.9, 130.6, 129.1, 118.8, 114.9, 107.7, 61.8, 55.5, 53.0, 52.5, 14.4; HRMS (Q-TOF,  $m/z$ ) calcd for  $\text{C}_{18}\text{H}_{19}\text{NO}_6\text{Na}$   $[\text{M}+\text{Na}]^+$  368.1110, found 368.1098.



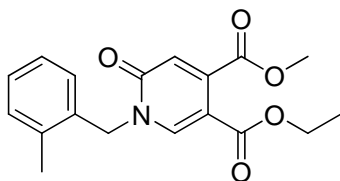

3-Ethyl

4-methyl

**1-(2-methylbenzyl)-6-oxo-1,6-dihydropyridine-3,4-dicarboxylate (4am):** white solid; 120.7 mg; 74% yield; mp 122 – 123 °C;  $^1\text{H}$  NMR (400 MHz,  $\text{CD}_3\text{COCD}_3$ )  $\delta$  8.31 (d,  $J = 5.2$  Hz, 1H), 7.20-7.24 (d,  $J = 13.0$  Hz, 3H), 7.04 (d,  $J = 5.3$  Hz, 1H), 6.50-6.52 (d,  $J = 5.3$  Hz, 1H), 5.26 (s, 2H), 4.18 (d,  $J = 12.4$  Hz, 2H), 3.84-3.87 (d,  $J = 5.3$  Hz, 3H), 2.35 (d,  $J = 5.3$  Hz, 3H), 1.22 – 1.25 (m, 3H);  $^{13}\text{C}$  NMR (100 MHz,  $\text{CD}_3\text{COCD}_3$ )  $\delta$  166.1, 163.9, 161.8, 145.2, 131.4, 128.8, 128.3, 127.1, 118.6, 107.3, 61.8, 53.0, 50.6, 19.1, 14.3; HRMS (Q-TOF,  $m/z$ ) calcd for  $\text{C}_{18}\text{H}_{19}\text{NO}_5\text{Na}$   $[\text{M}+\text{Na}]^+$  352.1161, found 352.1176.

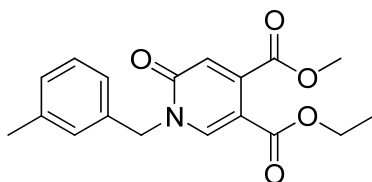

3-Ethyl

4-methyl

**1-(3-methylbenzyl)-6-oxo-1,6-dihydropyridine-3,4-dicarboxylate (4an):** white solid; 129.2 mg; 79% yield; mp 118 – 119 °C;  $^1\text{H}$  NMR (400 MHz,  $\text{CD}_3\text{COCD}_3$ )  $\delta$  8.48 (s, 1H), 7.28 – 7.04 (m, 4H), 6.43 (s, 1H), 5.22 (s, 2H), 4.20-4.23 (s, 2H), 3.84 (s, 3H), 2.29 (s, 3H), 1.26 (s, 3H);  $^{13}\text{C}$  NMR (100 MHz,  $\text{CD}_3\text{COCD}_3$ )  $\delta$  167.1, 164.6, 162.2, 145.4, 137.2, 129.5, 125.9, 118.8, 107.8, 61.8, 52.98, 52.92, 21.3, 14.4; HRMS (Q-TOF,  $m/z$ ) calcd for  $\text{C}_{18}\text{H}_{19}\text{NO}_5\text{Na}$   $[\text{M}+\text{Na}]^+$  352.1161, found 352.1176.

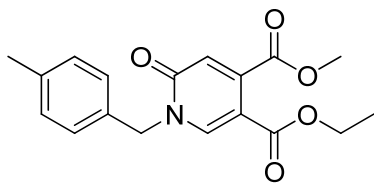

**3-Ethyl**

**4-methyl**

**1-(4-methylbenzyl)-6-oxo-1,6-dihydropyridine-3,4-dicarboxylate (4ao):** white

solid; 127.6 mg; 78% yield; mp 128 – 129 °C; <sup>1</sup>H NMR (400 MHz, CD<sub>3</sub>COCD<sub>3</sub>) δ

8.47 (s, 1H), 7.28-7.30 (d, *J* = 8.0 Hz, 2H), 7.16-7.18 (d, *J* = 7.9 Hz, 2H), 6.49 (s, 1H),

5.22 (s, 2H), 4.19-4.21 (q, *J* = 7.1 Hz, 2H), 3.84 (s, 3H), 2.29 (s, 3H), 1.24-1.27 (t, *J* =

7.1 Hz, 3H);  $^{13}\text{C}$  NMR (100 MHz,  $\text{CD}_3\text{COCD}_3$ )  $\delta$  166.7, 163.7, 161.3, 145.3, 144.9, 138.5, 134.3, 130.2, 129.0, 118.8, 107.5, 61.7, 52.9, 52.7, 21.0, 14.4; HRMS (Q-TOF,  $m/z$ ) calcd for  $\text{C}_{18}\text{H}_{19}\text{NO}_5\text{Na}$   $[\text{M}+\text{Na}]^+$  352.1161, found 352.1167.

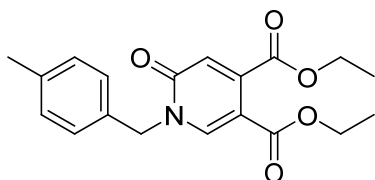

**Diethyl**

**1-(4-methylbenzyl)-6-oxo-1,6-dihydropyridine-3,4-dicarboxylate (4ap):** white solid; 116.5 mg; 68% yield; mp 121 – 122 °C;  $^1\text{H}$  NMR (400 MHz,  $\text{CD}_3\text{COCD}_3$ )  $\delta$  8.46 (s, 1H), 7.28-7.30 (d,  $J = 8.0$  Hz, 2H), 7.17-7.19 (d,  $J = 7.9$  Hz, 2H), 6.48 (s, 1H), 5.22 (s, 2H), 4.31 (q,  $J = 7.1$  Hz, 2H), 4.22 (q,  $J = 7.1$  Hz, 2H), 2.30 (s, 3H), 1.31 (t,  $J = 7.1$  Hz, 3H), 1.26 (t,  $J = 7.1$  Hz, 3H);  $^{13}\text{C}$  NMR (100 MHz,  $\text{CD}_3\text{COCD}_3$ )  $\delta$  166.1, 163.9, 161.7, 145.27, 145.23, 138.5, 134.3, 130.2, 128.9, 118.8, 107.8, 62.4, 61.7, 52.6, 21.0, 14.4, 14.2; HRMS (Q-TOF,  $m/z$ ) calcd for  $\text{C}_{19}\text{H}_{21}\text{NO}_5\text{Na}$   $[\text{M}+\text{Na}]^+$  366.1317, found 366.1311.

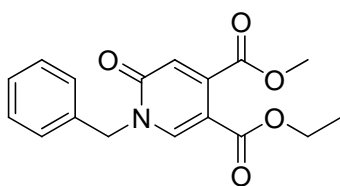

**3-Ethyl**

**4-methyl**

**1-benzyl-6-oxo-1,6-dihydropyridine-3,4-dicarboxylate (4aq):** white solid; 146.7 mg; 93% yield; mp 130 – 131 °C;  $^1\text{H}$  NMR (400 MHz, DMSO)  $\delta$  8.67 (s, 1H), 7.28-7.35 (dd,  $J = 17.2, 6.8$  Hz, 5H), 6.58 (s, 1H), 5.23 (s, 2H), 4.18-4.24 (q,  $J = 7.1$  Hz, 2H), 3.80 (s, 3H), 1.18-1.26 (t,  $J = 7.1$  Hz, 3H);  $^{13}\text{C}$  NMR (100 MHz, DMSO)  $\delta$  167.5, 164.2, 161.9, 146.5, 145.0, 137.6, 130.0, 129.1, 129.0,

118.9, 107.5, 62.4, 54.0, 53.2, 15.3; HRMS (Q-TOF, m/z) calcd for  $C_{17}H_{17}NO_5Na$   $[M+Na]^+$  338.1004, found 338.1020.

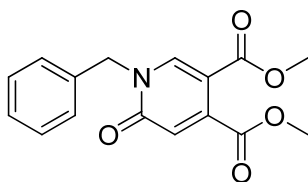

**Dimethyl**

**1-benzyl-6-oxo-1,6-dihydropyridine-3,4-dicarboxylate (4ar):** white solid; 115.9 mg; 77% yield; mp 125 – 127 °C;  $^1H$  NMR (400 MHz,  $CD_3COCD_3$ )  $\delta$  8.49 (s, 1H), 7.42 – 7.29 (m, 5H), 6.50 (s, 1H), 5.27 (s, 2H), 3.84 (s, 3H), 3.75 (s, 3H);  $^{13}C$  NMR (100 MHz,  $CD_3COCD_3$ )  $\delta$  167.1, 163.8, 161.7, 145.4, 145.0, 137.3, 129.6, 128.9, 128.8, 118.9, 107.4, 53.03, 53.00, 52.4.; HRMS (Q-TOF, m/z) calcd for  $C_{16}H_{15}NO_5Na$   $[M+Na]^+$  324.0848, found 324.0843.

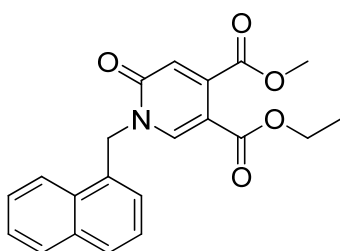

**3-Ethyl**

**4-methyl**

**1-(naphthalen-1-ylmethyl)-6-oxo-1,6-dihydropyridine-3,4-dicarboxylate (4as):** white solid; 174 mg; 95% yield; mp 117 – 119 °C;  $^1H$  NMR (400 MHz,  $CD_3COCD_3$ )  $\delta$  8.34 (s, 1H), 8.11 (d,  $J = 7.9$  Hz, 1H), 7.94-7.98 (dd,  $J = 15.7, 8.0$  Hz, 2H), 7.61 – 7.51 (m, 3H), 7.39-7.40 (d,  $J = 6.9$  Hz, 1H), 6.58 (s, 1H), 5.76 (s, 2H), 4.12-4.18 (q,  $J = 7.0$  Hz, 2H), 3.85 (s, 3H), 1.17-1.20 (t,  $J = 7.0$  Hz, 3H).;  $^{13}C$  NMR (100 MHz,  $CD_3COCD_3$ )  $\delta$  167.1, 163.7, 161.7, 144.9, 144.6, 129.81, 129.80, 129.73, 129.70, 127.13, 127.1, 123.9, 118.7, 107.7, 61.7, 53.0, 49.8, 14.3; HRMS (Q-TOF, m/z) calcd for  $C_{21}H_{19}NO_5Na$   $[M+Na]^+$  388.1161, found 388.1158.

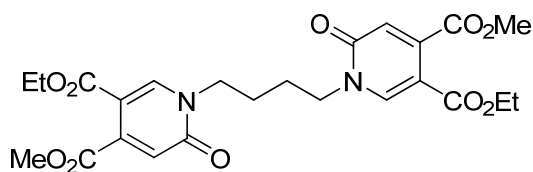

3-Diethyl

4-dimethyl

**1,1'-(butane-1,4-diyl)bis(6-oxo-1,6-dihydropyridine-3,4-dicarboxylate) (4at):**

white solid; 0.305 mg; 61% yield; mp 216 – 217 °C; <sup>1</sup>H NMR (400 MHz, CDCl<sub>3</sub>) δ 8.11 (s, 2H), 6.51 (s, 2H), 4.26-4.28 (d, *J* = 6.6 Hz, 4H), 4.01 (s, 4H), 3.88 (s, 6H), 1.79 (s, 4H), 1.32 (d, *J* = 26.7 Hz, 6H); <sup>13</sup>C NMR (100 MHz, CDCl<sub>3</sub>) δ 166.5, 163.0, 161.5, 144.1, 143.5, 118.7, 107.8, 61.6, 53.0, 49.8, 26.1, 14.2; HRMS (Q-TOF, *m/z*) calcd for C<sub>24</sub>H<sub>28</sub>N<sub>2</sub>O<sub>10</sub>Na [M+Na]<sup>+</sup> 527.1642, found 527.1649.

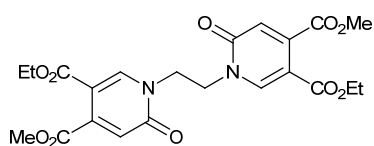

3-Diethyl

4-dimethyl

**1,1'-(ethane-1,2-diyl)bis(6-oxo-1,6-dihydropyridine-3,4-dicarboxylate) (4au):**

white solid; 141 mg; 30% yield; mp 214 – 215 °C; <sup>1</sup>H NMR (400 MHz, CDCl<sub>3</sub>) δ 7.91 (s, 2H), 6.56 (s, 2H), 4.32 (s, 4H), 4.22-4.27 (q, *J* = 7.1 Hz, 4H), 3.88 (s, 6H), 1.27-1.31 (t, *J* = 7.1 Hz, 6H); <sup>13</sup>C NMR (100 MHz, CDCl<sub>3</sub>) δ 166.4, 162.4, 161.5, 144.9, 143.5, 118.7, 108.4, 61.8, 53.1, 48.8, 14.2; HRMS (Q-TOF, *m/z*) calcd for C<sub>22</sub>H<sub>24</sub>N<sub>2</sub>O<sub>10</sub>Na [M+Na]<sup>+</sup> 499.1329, found 499.1335.

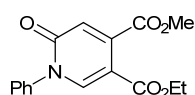

3-Ethyl

4-methyl

**6-oxo-1-phenyl-1,6-dihydropyridine-3,4-dicarboxylate (4av):** white solid; 176 mg;

28% yield (2 mmol); mp 123 – 124 °C; <sup>1</sup>H NMR (400 MHz, CDCl<sub>3</sub>) δ 8.17 (s, 1H), 7.50 – 7.52 (m, 3H), 7.37 (s, 2H), 6.63 (s, 1H), 4.28 (d, *J* = 4.1 Hz, 2H), 3.93 (s, 3H),

1.30 (t,  $J = 12.9$  Hz, 3H);  $^{13}\text{C}$  NMR (100 MHz,  $\text{CDCl}_3$ )  $\delta$  166.6, 162.6, 161.3, 144.0, 139.4, 129.7, 126.3, 119.6, 107.6, 61.6, 53.1, 14.2; HRMS (Q-TOF,  $m/z$ ) calcd for  $\text{C}_{16}\text{H}_{15}\text{NO}_5\text{Na}$   $[\text{M}+\text{Na}]^+$  324.0848, found 324.0846.

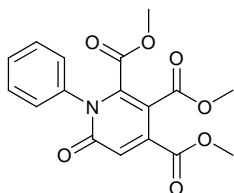

**Trimethyl**

**6-oxo-1-phenyl-1,6-dihydropyridine-2,3,4-tricarboxylate (5aa):** white solid; 138mg; 83% yield; mp 112 – 113 °C;  $^1\text{H}$  NMR (400 MHz,  $\text{CDCl}_3$ )  $\delta$  7.48 (d,  $J = 8.0$  Hz, 3H), 7.25 (d,  $J = 8.1$  Hz, 2H), 6.84 (s, 1H), 3.91 (s, 3H), 3.80 (s, 3H), 3.48 (s, 3H);  $^{13}\text{C}$  NMR (100 MHz,  $\text{CDCl}_3$ )  $\delta$  165.6, 163.5, 161.2, 160.5, 145.6, 143.1, 136.2, 129.9, 129.3, 128.1, 121.3, 106.6, 53.1, 53.0, 52.9; HRMS (Q-TOF,  $m/z$ ) calcd for  $\text{C}_{17}\text{H}_{15}\text{NO}_7\text{Na}$   $[\text{M}+\text{Na}]^+$  368.0746, found 368.0740.

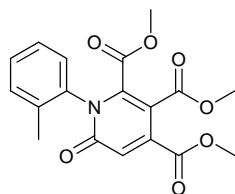

**Trimethyl**

**6-oxo-1-o-tolyl-1,6-dihydropyridine-2,3,4-tricarboxylate (5ab):** white solid; 131.1 mg; 73% yield; mp 113 – 114 °C;  $^1\text{H}$  NMR (400 MHz,  $\text{CDCl}_3$ )  $\delta$  7.35-7.37 (dt,  $J = 8.0$  Hz, 3H), 7.27 (d,  $J = 7.2$  Hz, 1H), 6.83 (s, 1H), 3.92 (s, 3H), 3.79 (s, 3H), 3.46 (s, 3H), 2.16 (s, 3H);  $^{13}\text{C}$  NMR (100 MHz,  $\text{CDCl}_3$ )  $\delta$  165.7, 163.4, 161.1, 159.8, 145.8, 143.4, 136.5, 135.6, 135.4, 131.0, 130.2, 127.9, 126.7, 121.0, 106.3, 53.1, 52.9, 52.8, 17.4; HRMS (Q-TOF,  $m/z$ ) calcd for  $\text{C}_{18}\text{H}_{17}\text{NO}_7\text{Na}$   $[\text{M}+\text{Na}]^+$  382.0903, found 382.0908.

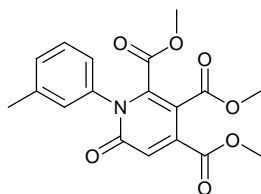

**Trimethyl**

**6-oxo-1-m-tolyl-1,6-dihydropyridine-2,3,4-tricarboxylate (5ac):** white solid; 137.7 mg; 74% yield; mp 134 – 135 °C; <sup>1</sup>H NMR (400 MHz, CDCl<sub>3</sub>) δ 7.36 (t, *J* = 7.7 Hz, 1H), 7.326-7.28 (d, *J* = 7.7 Hz, 1H), 7.04 – 7.05 (m, 2H), 6.83 (s, 1H), 3.91 (s, 3H), 3.80 (s, 3H), 3.50 (s, 3H), 2.39 (s, 3H); <sup>13</sup>C NMR (100 MHz, CDCl<sub>3</sub>) δ 165.7, 163.6, 161.3, 160.6, 145.6, 143.1, 139.5, 136.1, 129.1, 128.5, 124.9, 121.3, 106.5, 53.1, 53.0, 52.9, 21.2; HRMS (Q-TOF, *m/z*) calcd for C<sub>18</sub>H<sub>17</sub>NO<sub>7</sub>Na [M+Na]<sup>+</sup> 382.0903, found 382.0912.

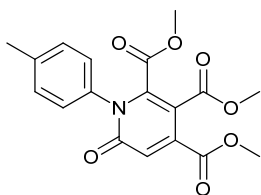

**Trimethyl**

**6-oxo-1-p-tolyl-1,6-dihydropyridine-2,3,4-tricarboxylate (5ad):** white solid; 168.8 mg; 90% yield; mp 124 – 125 °C; <sup>1</sup>H NMR (400 MHz, CDCl<sub>3</sub>) δ 7.27-7.29 (d, *J* = 8.0 Hz, 2H), 7.11-7.13 (d, *J* = 8.1 Hz, 2H), 6.83 (s, 1H), 3.92 (s, 3H), 3.80 (s, 3H), 3.52 (s, 3H), 2.40 (s, 3H); <sup>13</sup>C NMR (100 MHz, CDCl<sub>3</sub>) δ 165.7, 163.6, 161.4, 160.9, 145.6, 143.2, 140.2, 133.6, 130.1, 127.8, 121.3, 106.6, 53.2, 53.1, 53.0, 21.3; HRMS (Q-TOF, *m/z*) calcd for C<sub>18</sub>H<sub>17</sub>NO<sub>7</sub>Na [M+Na]<sup>+</sup> 382.0903, found 382.0906.

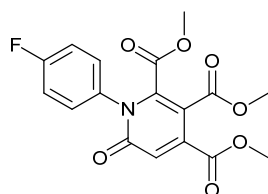

**Trimethyl**

**1-(4-fluorophenyl)-6-oxo-1,6-dihydropyridine-2,3,4-tricarboxylate (5ae):** white

solid; 134.7 mg; 71% yield; mp 160 – 162 °C; <sup>1</sup>H NMR (400 MHz, CDCl<sub>3</sub>) δ 7.23-7.27 (d, *J* = 8.0 Hz, 2H), 7.17-7.19 (d, *J* = 8.1 Hz, 2H), 6.81 (s, 1H), 3.92 (s, 3H), 3.81 (s, 3H), 3.55 (s, 3H); <sup>13</sup>C NMR (100 MHz, CDCl<sub>3</sub>) δ 165.6, 164.3, 163.5, 161.8, 161.3, 160.6, 145.6, 143.3, 132.1, 130.3, 130.2, 121.4, 116.7, 116.4, 106.8, 53.28, 53.026, 53.0; <sup>19</sup>F NMR (377 MHz, CDCl<sub>3</sub>) δ -110.6; HRMS (Q-TOF, *m/z*) calcd for C<sub>17</sub>H<sub>14</sub>FNO<sub>7</sub>Na [M+Na]<sup>+</sup> 386.0652, found 386.0644.

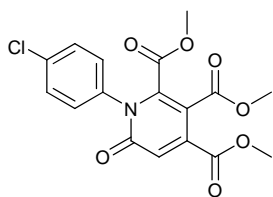

**Trimethyl**

**1-(4-chlorophenyl)-6-oxo-1,6-dihydropyridine-2,3,4-tricarboxylate (5af):** white solid; 139.8 mg; 71% yield; mp 150 – 151 °C; <sup>1</sup>H NMR (400 MHz, CDCl<sub>3</sub>) δ 7.45-7.47 (d, *J* = 8.0 Hz, 2H), 7.21 (d, *J* = 8.1 Hz, 2H), 6.83 (s, 1H), 3.92 (s, 3H), 3.81 (s, 3H), 3.56 (s, 3H); <sup>13</sup>C NMR (100 MHz, CDCl<sub>3</sub>) δ 165.5, 163.5, 161.2, 160.4, 145.3, 143.3, 136.1, 134.7, 129.7, 129.6, 121.5, 106.8, 53.3, 53.2, 53.0; HRMS (Q-TOF, *m/z*) calcd for C<sub>17</sub>H<sub>14</sub>ClNO<sub>7</sub>Na [M+Na]<sup>+</sup> 402.0356, found 402.0347.

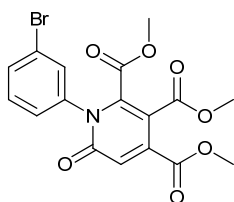

**Trimethyl**

**1-(3-bromophenyl)-6-oxo-1,6-dihydropyridine-2,3,4-tricarboxylate (5ag):** white solid; 145.5 mg; 69% yield; mp 151 – 152 °C; <sup>1</sup>H NMR (400 MHz, CDCl<sub>3</sub>) δ 7.61-7.63 (d, *J* = 8.1 Hz, 1H), 7.39 (s, 1H), 7.45 (t, *J* = 8.0 Hz, 1H), 7.37 (d, *J* = 8.0 Hz, 1H), 6.84 (s, 1H), 3.92 (s, 3H), 3.81 (s, 3H), 3.56 (s, 3H); <sup>13</sup>C NMR (100 MHz, CDCl<sub>3</sub>) δ 165.5, 163.4, 162.3, 161.1, 160.3, 145.0, 143.2, 137.3, 131.3, 131.1, 130.4,



127.1, 122.5, 121.6, 107.1, 53.3, 53.2, 53.0; HRMS (Q-TOF,  $m/z$ ) calcd for  $C_{17}H_{14}BrNO_7Na$   $[M+Na]^+$  445.9851, found 445.9858.

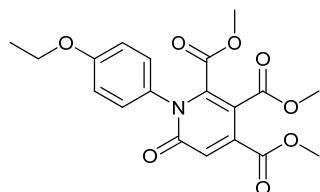

### Trimethyl

**1-(4-ethoxyphenyl)-6-oxo-1,6-dihydropyridine-2,3,4-tricarboxylate (5ah):** white solid; 180.7 mg; 89% yield; mp 103 – 104 °C;  $^1H$  NMR (400 MHz,  $CDCl_3$ )  $\delta$  7.13-7.16 (d,  $J = 8.7$  Hz, 2H), 6.94-6.96 (d,  $J = 8.7$  Hz, 2H), 6.81 (d,  $J = 8.4$  Hz, 1H), 4.06 – 4.08 (m, 2H), 3.91 (d,  $J = 8.7$  Hz, 3H), 3.80 (d,  $J = 8.1$  Hz, 3H), 3.54 (d,  $J = 7.5$  Hz, 3H), 1.41 – 1.44 (m, 3H);  $^{13}C$  NMR (100 MHz,  $CDCl_3$ )  $\delta$  165.8, 163.6, 161.4, 160.9, 159.8, 146.2, 143.2, 129.2, 128.4, 121.1, 115.0, 105.9, 63.8, 53.2, 53.1, 52.9, 14.7; HRMS (Q-TOF,  $m/z$ ) calcd for  $C_{19}H_{19}NO_8Na$   $[M+Na]^+$  412.1008, found 412.1015.

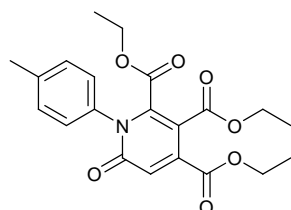

### Triethyl

**6-oxo-1-p-tolyl-1,6-dihydropyridine-2,3,4-tricarboxylate (5ai):** oil; 126.7 mg; 63% yield;  $^1H$  NMR (400 MHz,  $CDCl_3$ )  $\delta$  7.18-7.20 (d,  $J = 8.0$  Hz, 2H), 7.04-7.06 (d,  $J = 8.0$  Hz, 2H), 6.75 (s, 1H), 4.26-4.32 (q,  $J = 7.1$  Hz, 2H), 4.15-4.21 (q,  $J = 7.1$  Hz, 2H), 3.86-3.91 (d,  $J = 21.3$  Hz, 2H), 2.31 (s, 3H), 1.27-1.29 (t,  $J = 7.1$  Hz, 3H), 1.19-1.21 (d,  $J = 7.2$  Hz, 3H), 0.88-0.92 (t,  $J = 7.1$  Hz, 3H);  $^{13}C$  NMR (100 MHz,  $CDCl_3$ )  $\delta$  165.2, 163.2, 160.8, 145.7, 143.6, 140.0, 133.7, 129.9, 128.0, 121.1, 106.8, 62.6, 62.3, 62.0, 29.6, 21.2, 13.9, 13.8, 13.3; HRMS (Q-TOF,  $m/z$ ) calcd for  $C_{21}H_{23}NO_7Na$

$[M+Na]^+$  424.1372, found 424.1378.

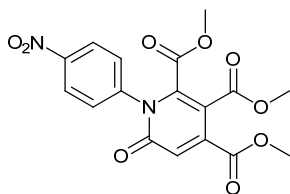

**Trimethyl**

**1-(4-nitrophenyl)-6-oxo-1,6-dihydropyridine-2,3,4-tricarboxylate (5aj):** white solid; 96.2 mg; 49% yield; mp 145–149 °C;  $^1\text{H}$  NMR (400 MHz,  $\text{CDCl}_3$ )  $\delta$  8.34–8.36 (d,  $J = 8.8$  Hz, 2H), 7.46–7.48 (d,  $J = 8.8$  Hz, 2H), 6.88 (s, 1H), 3.92 (s, 3H), 3.82 (s, 3H), 3.56 (s, 3H);  $^{13}\text{C}$  NMR (100 MHz,  $\text{CDCl}_3$ )  $\delta$  165.3, 163.5, 161.1, 160.1, 148.5, 144.2, 143.4, 141.8, 129.7, 124.8, 122.1, 108.4, 53.6, 53.4, 53.3; HRMS (Q-TOF,  $m/z$ ) calcd for  $\text{C}_{17}\text{H}_{14}\text{N}_2\text{O}_9\text{Na}$   $[M+Na]^+$ , 413.0597, found. 413.0591

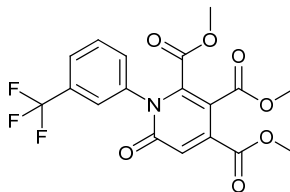

**Trimethyl**

**6-oxo-1-(3-(trifluoromethyl)phenyl)-1,6-dihydropyridine-2,3,4-tricarboxylate (5ak):** white solid; 80.5 mg; 39% yield; mp 92–94 °C;  $^1\text{H}$  NMR (400 MHz,  $\text{CDCl}_3$ )  $\delta$  7.74 (d,  $J = 7.9$  Hz, 1H), 7.64 (t,  $J = 7.9$  Hz, 1H), 7.54 (s, 1H), 7.50 (d,  $J = 8.1$  Hz, 1H), 6.86 (s, 1H), 3.93 (s, 3H), 3.81 (s, 3H), 3.52 (s, 3H);  $^{13}\text{C}$  NMR (100 MHz,  $\text{CDCl}_3$ )  $\delta$  165.5, 163.5, 161.2, 160.4, 145.1, 143.5, 137.0, 132.1, 130.2, 129.9, 125.4, 125.1, 121.8, 107.6, 53.4, 53.3, 53.2;  $^{19}\text{F}$  NMR (377 MHz,  $\text{CDCl}_3$ )  $\delta$  -63.2; HRMS (Q-TOF,  $m/z$ ) calcd for  $\text{C}_{18}\text{H}_{14}\text{F}_3\text{NO}_7\text{Na}$   $[M+Na]^+$  436.0620, found 436.0607.

**6-1 and 6-2:** white solid;  $^1\text{H}$  NMR (400 MHz,  $\text{CDCl}_3$ )  $\delta$  9.67 (s, 1H), 7.27 (s, 2H), 7.08 (s, 1H), 6.90 (d,  $J = 6.6$  Hz, 2H), 5.39 (s, 1H), 3.73 (s, 3H), 3.68 (s, 3H);  $^{13}\text{C}$  NMR (100 MHz,  $\text{CDCl}_3$ )  $\delta$  169.9, 164.9, 148.0, 140.3, 129.2, 124.3, 120.7, 93.6, 52.8,

51.3.

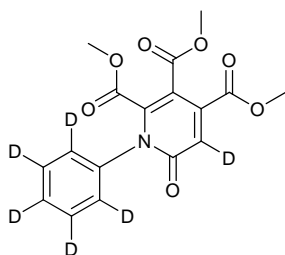

**D-Trimethyl**

**6-oxo-1-phenyl-1,6-dihydropyridine-2,3,4-tricarboxylate (D-5aa):** white solid; 137.1 mg; 79% yield; mp 115–117 °C;  $^1\text{H}$  NMR (400 MHz,  $\text{CDCl}_3$ )  $\delta$  7.47 (s, 3.00H), 7.25 (d,  $J = 4.4$  Hz, 2.00H), 6.83 (s, 0.48H), 3.91 (s, 3.00H), 3.80 (s, 3.00H), 3.48 (s, 3.00H).

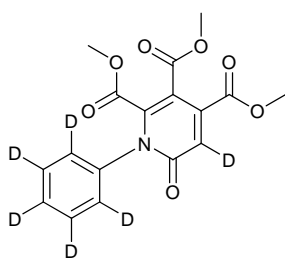

**D'-Trimethyl**

**6-oxo-1-phenyl-1,6-dihydropyridine-2,3,4-tricarboxylate (D'-5aa):** white solid; 180 mg (1 mmol); 51% yield; mp 121 – 122 °C;  $^1\text{H}$  NMR (400 MHz,  $\text{CDCl}_3$ )  $\delta$  6.83 (s, 0.17H), 3.92 (s, 2.99H), 3.80 (s, 3.02H), 3.48 (s, 3H); HRMS (Q-TOF,  $m/z$ ) calcd for  $\text{C}_{17}\text{H}_9\text{D}_6\text{NO}_7\text{Na}$   $[\text{M}+\text{Na}]^+$  374.1123, found 374.1112.

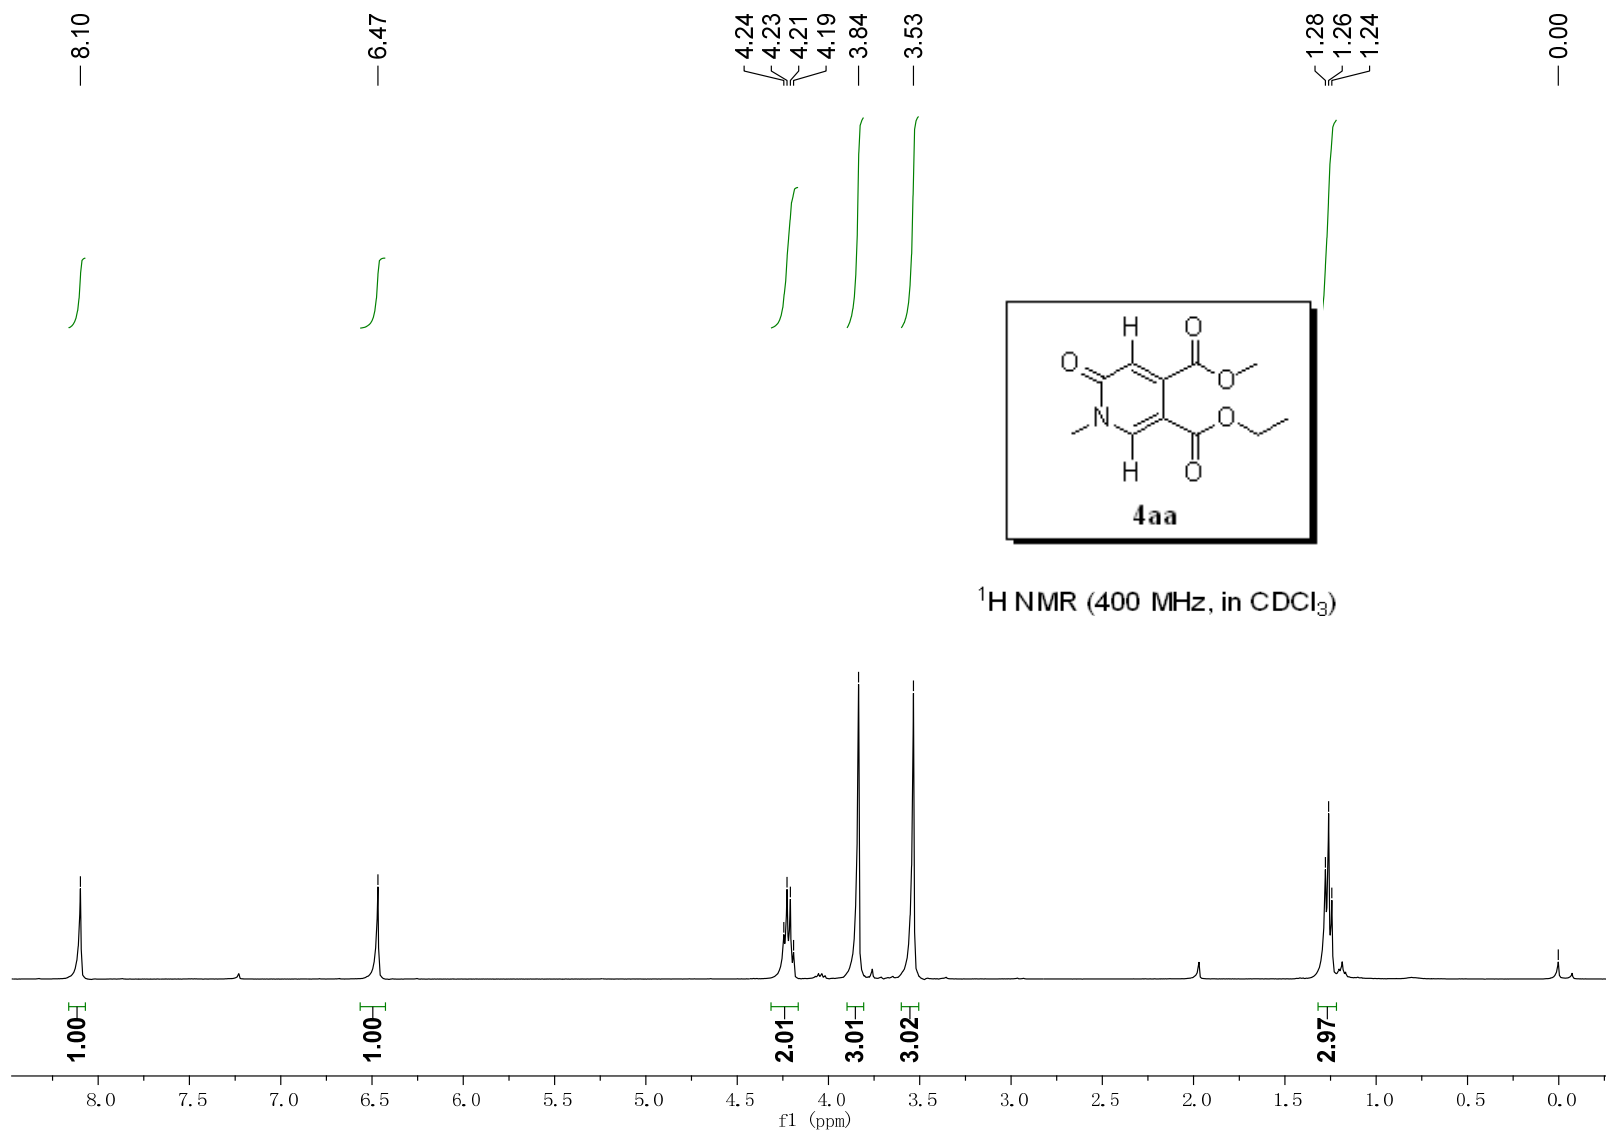

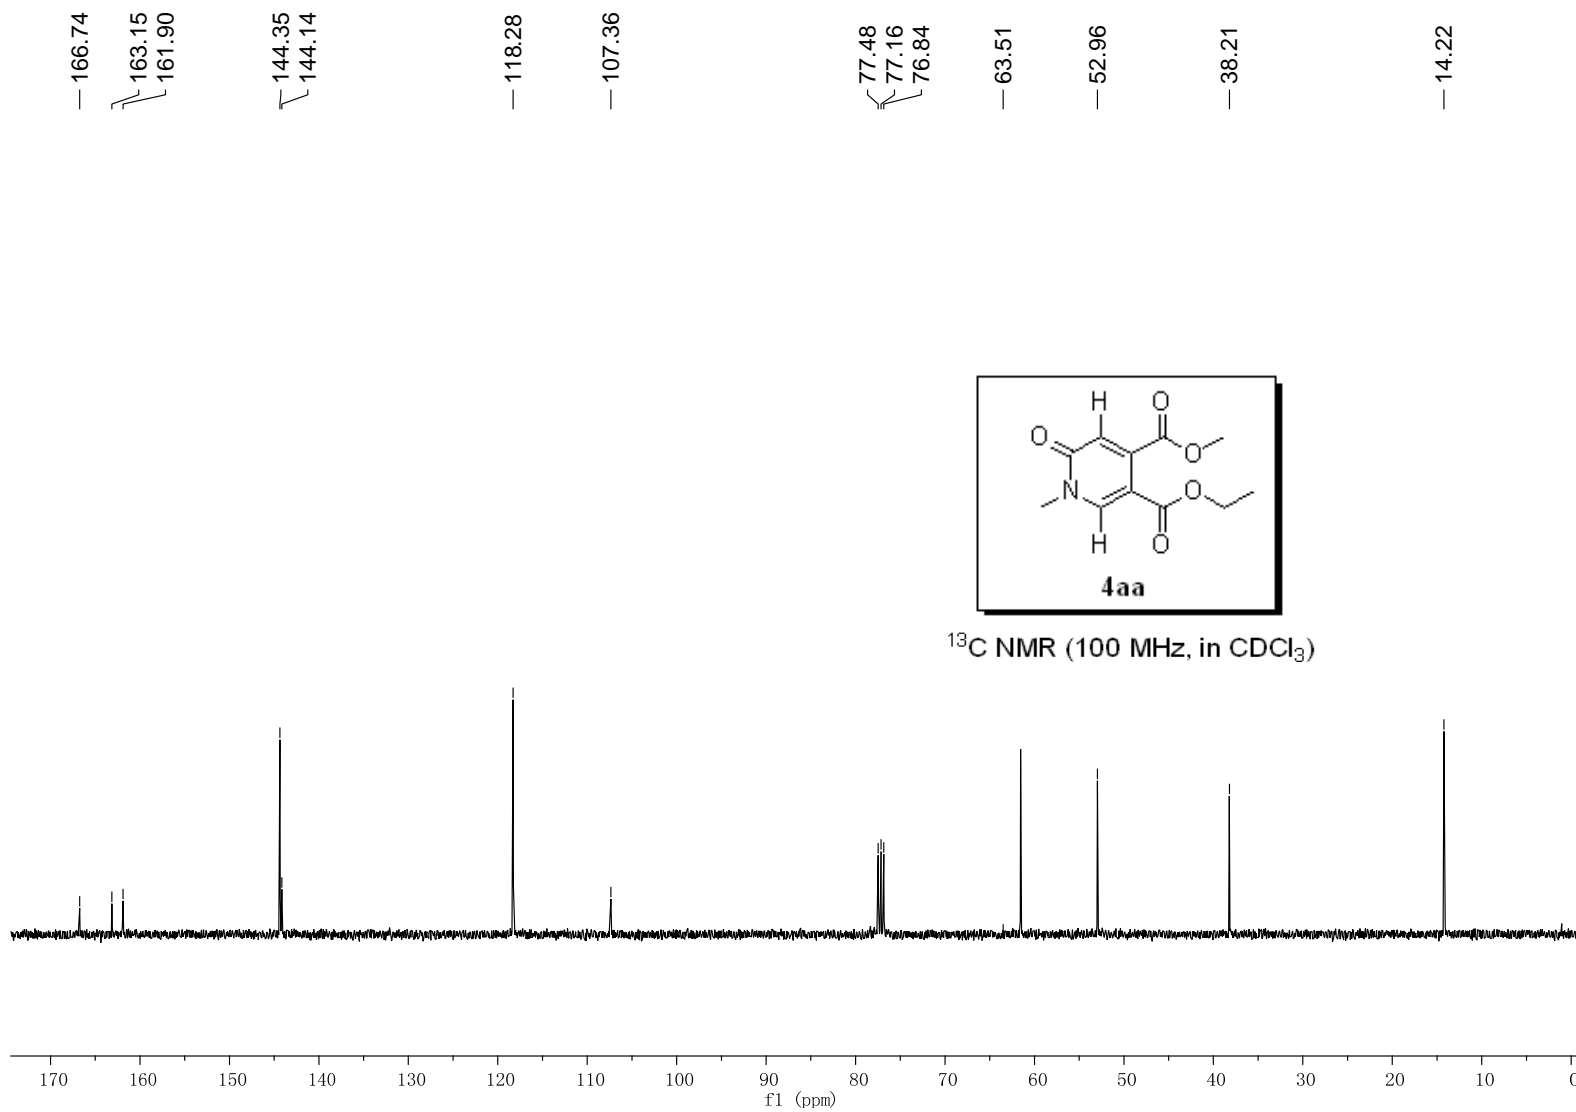

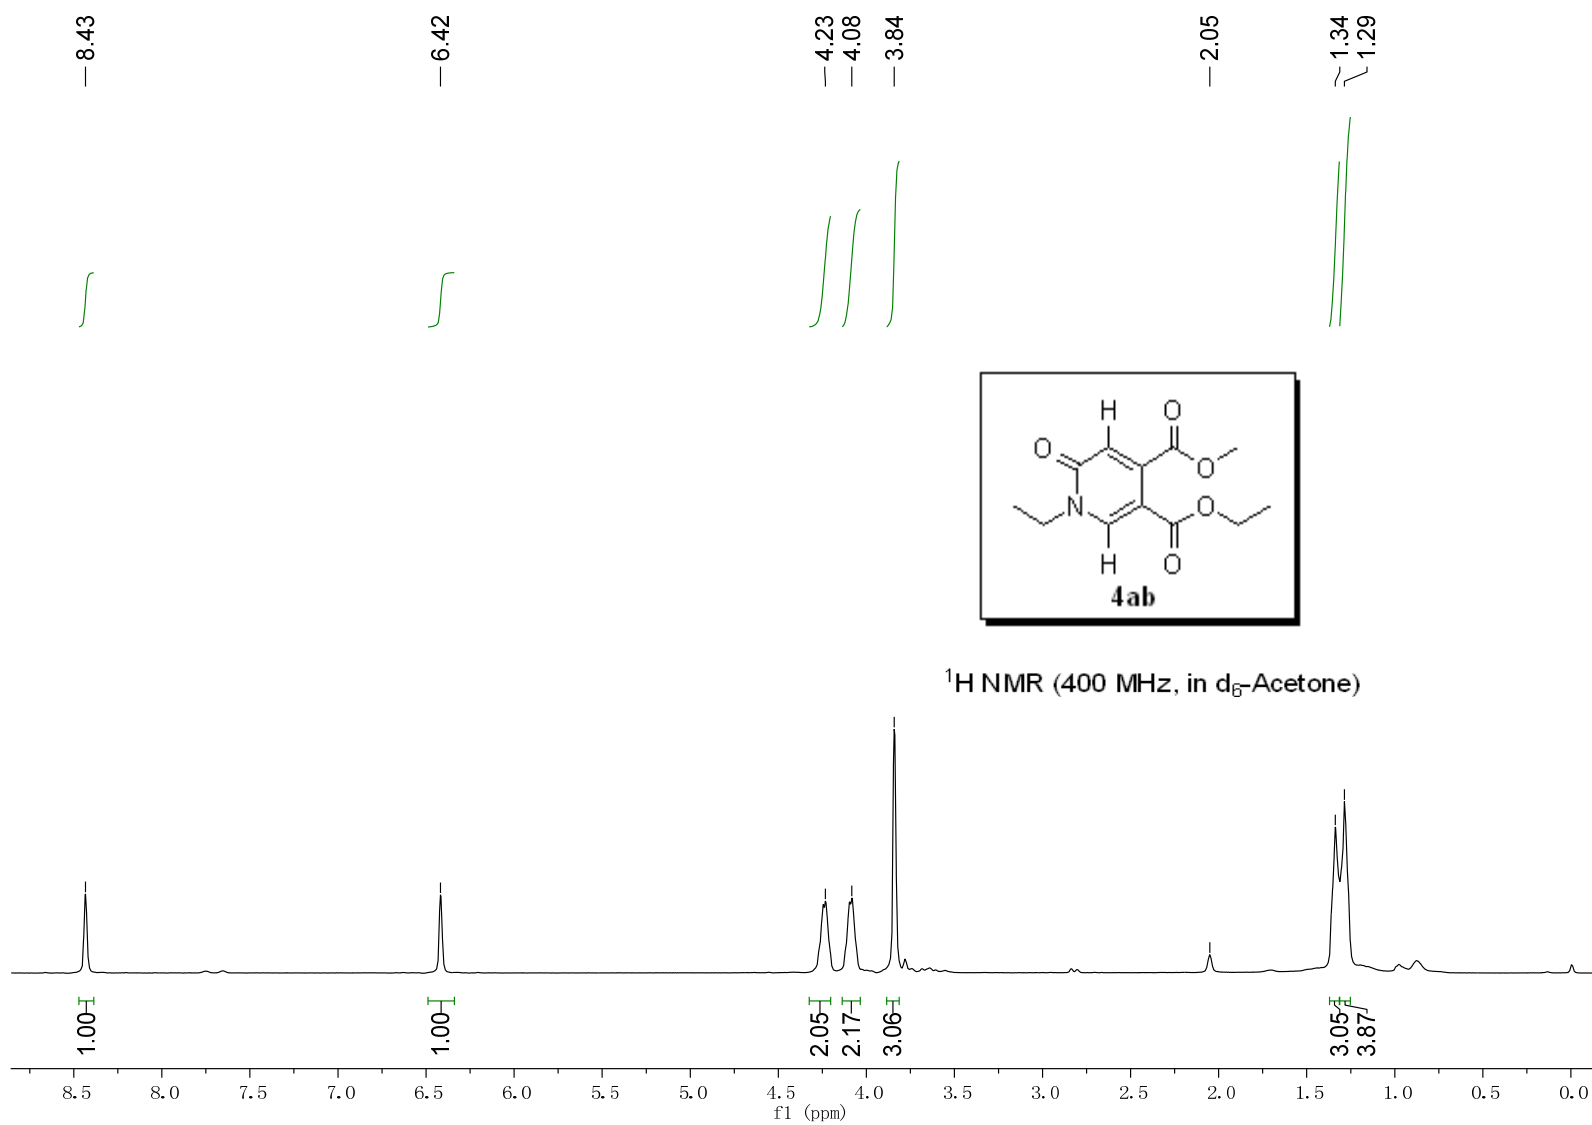

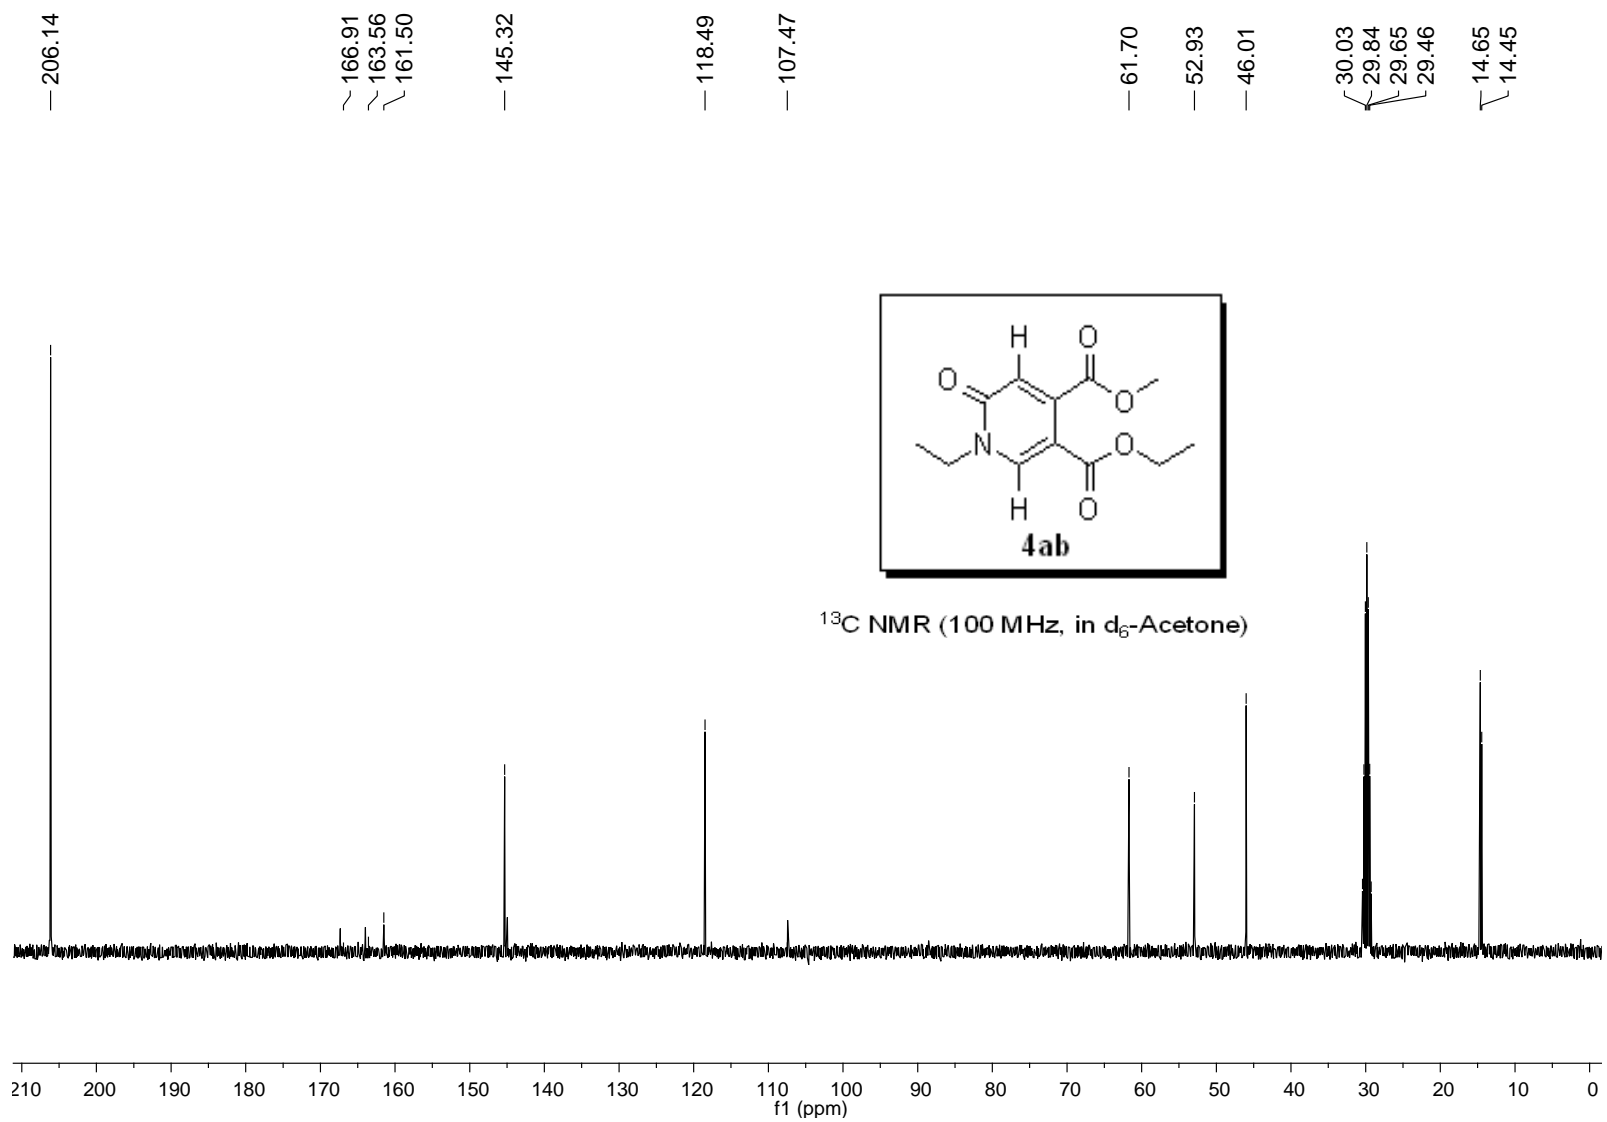

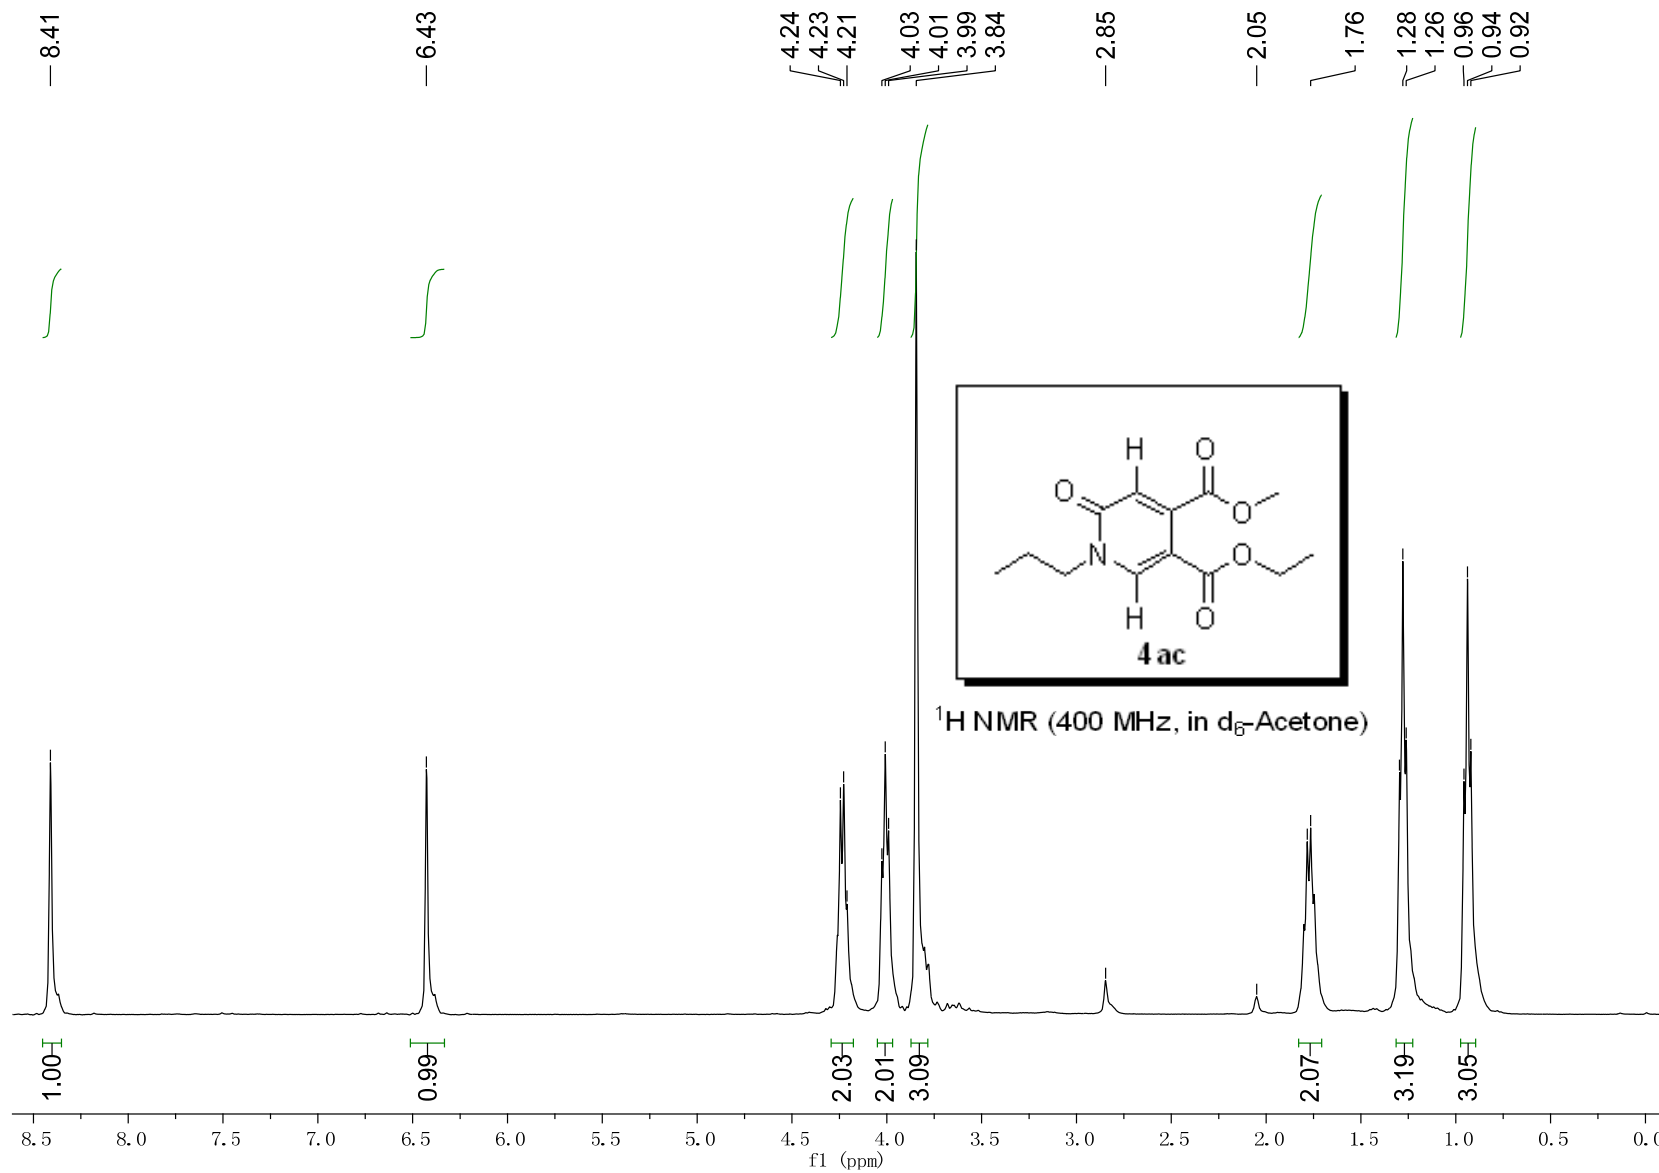



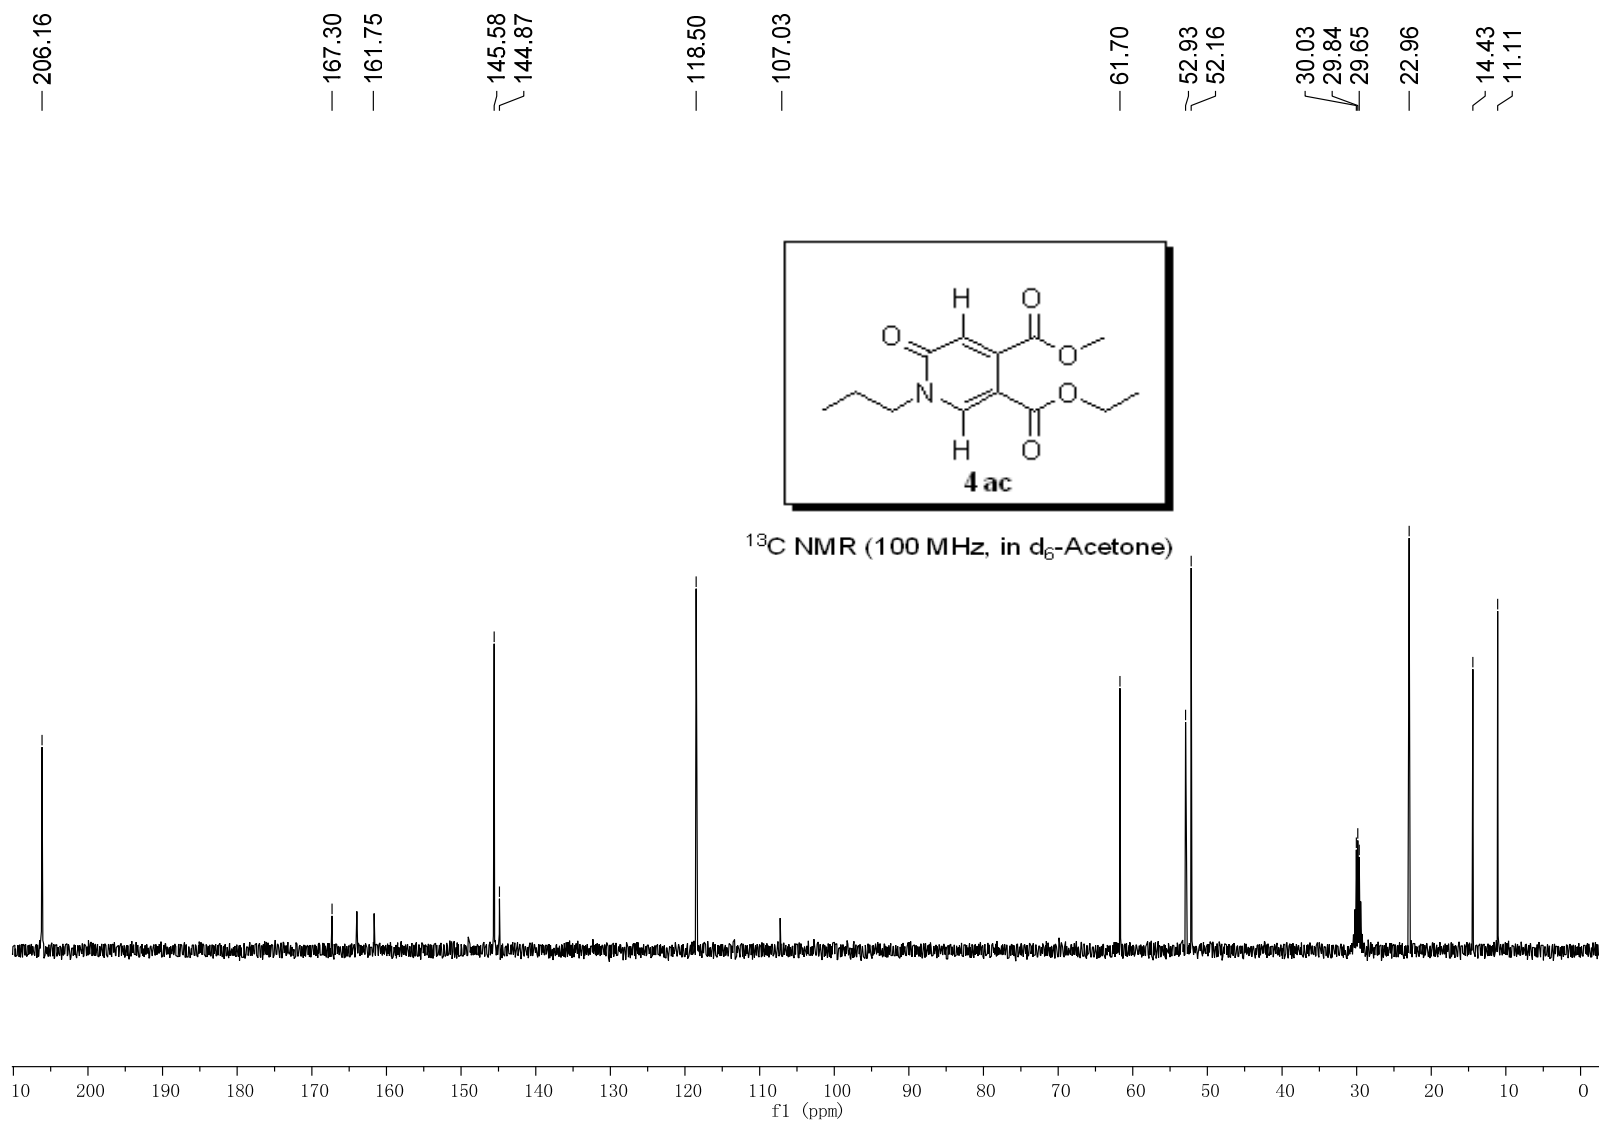

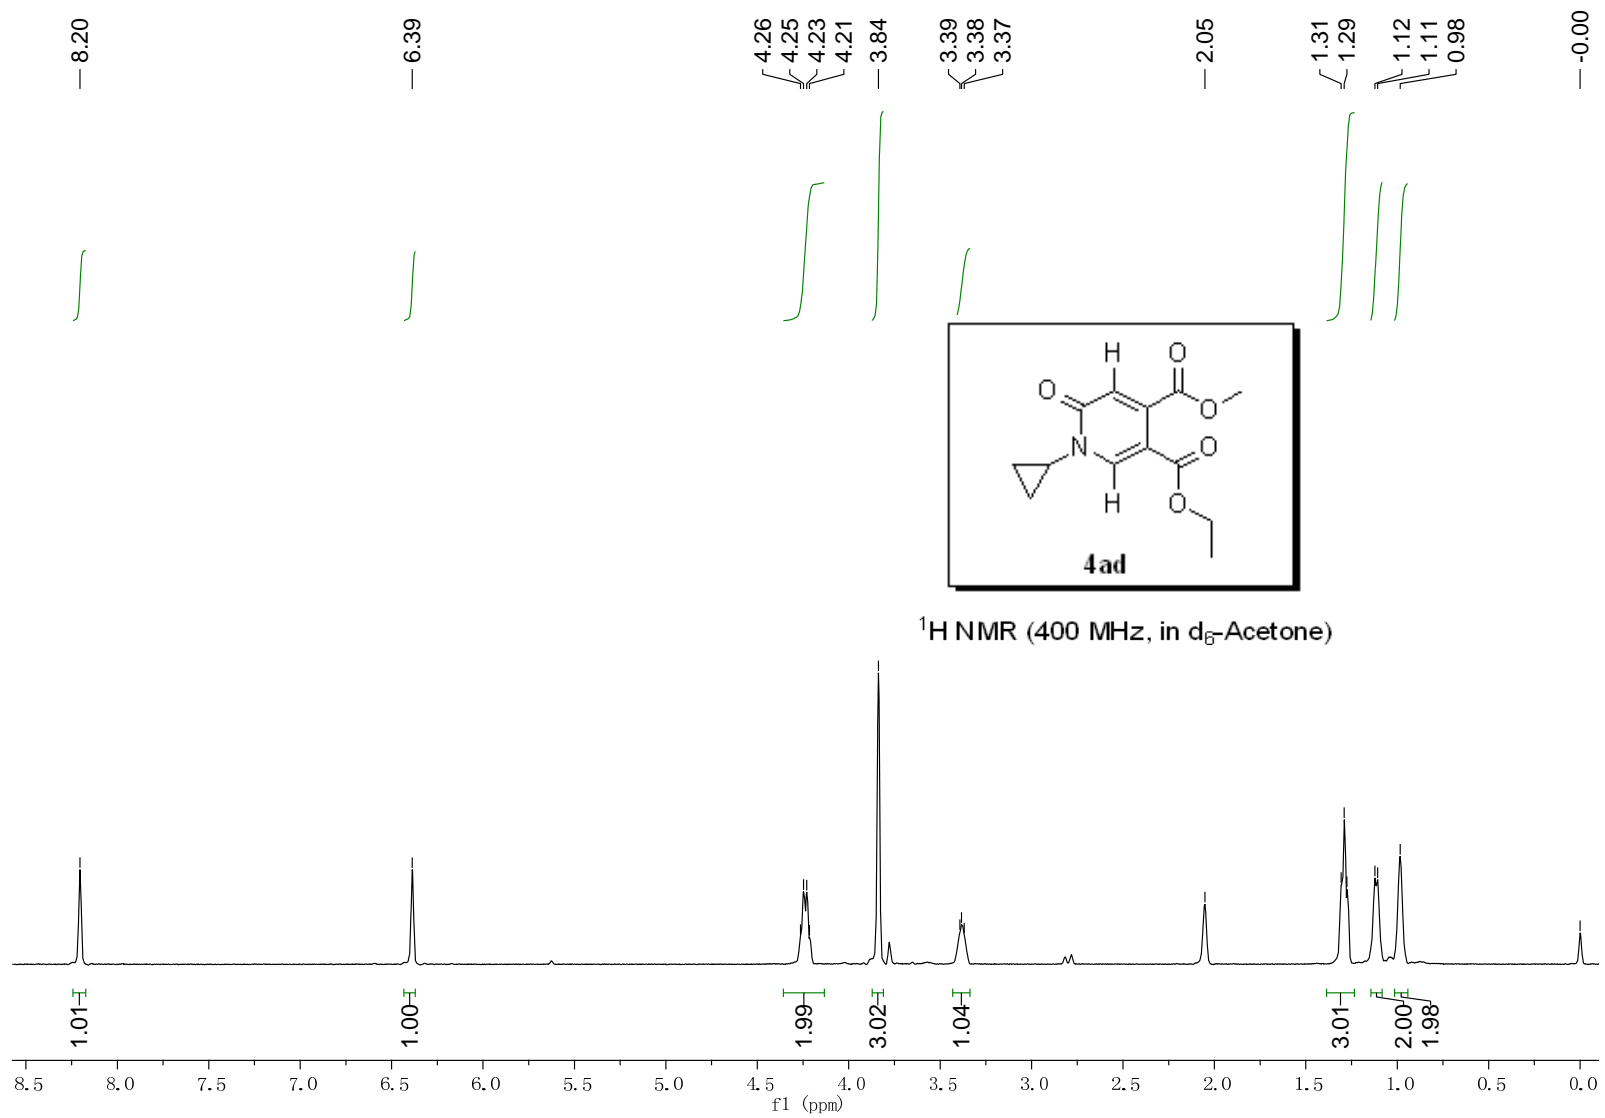

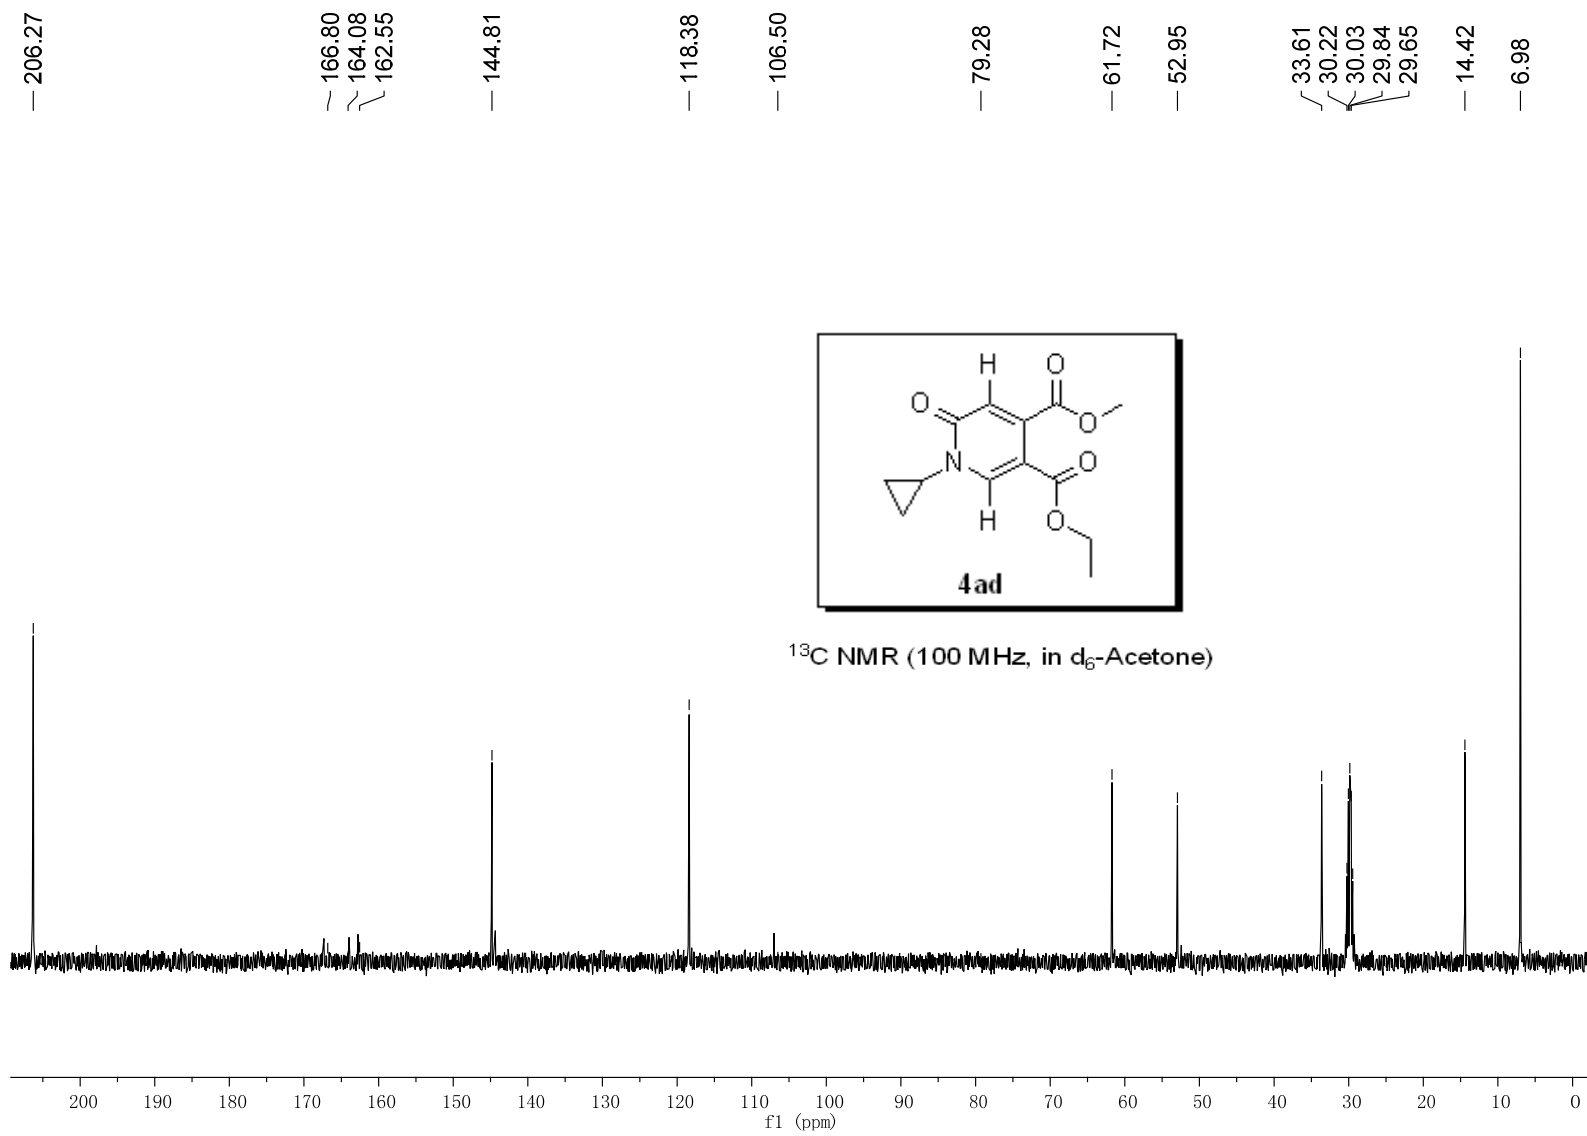

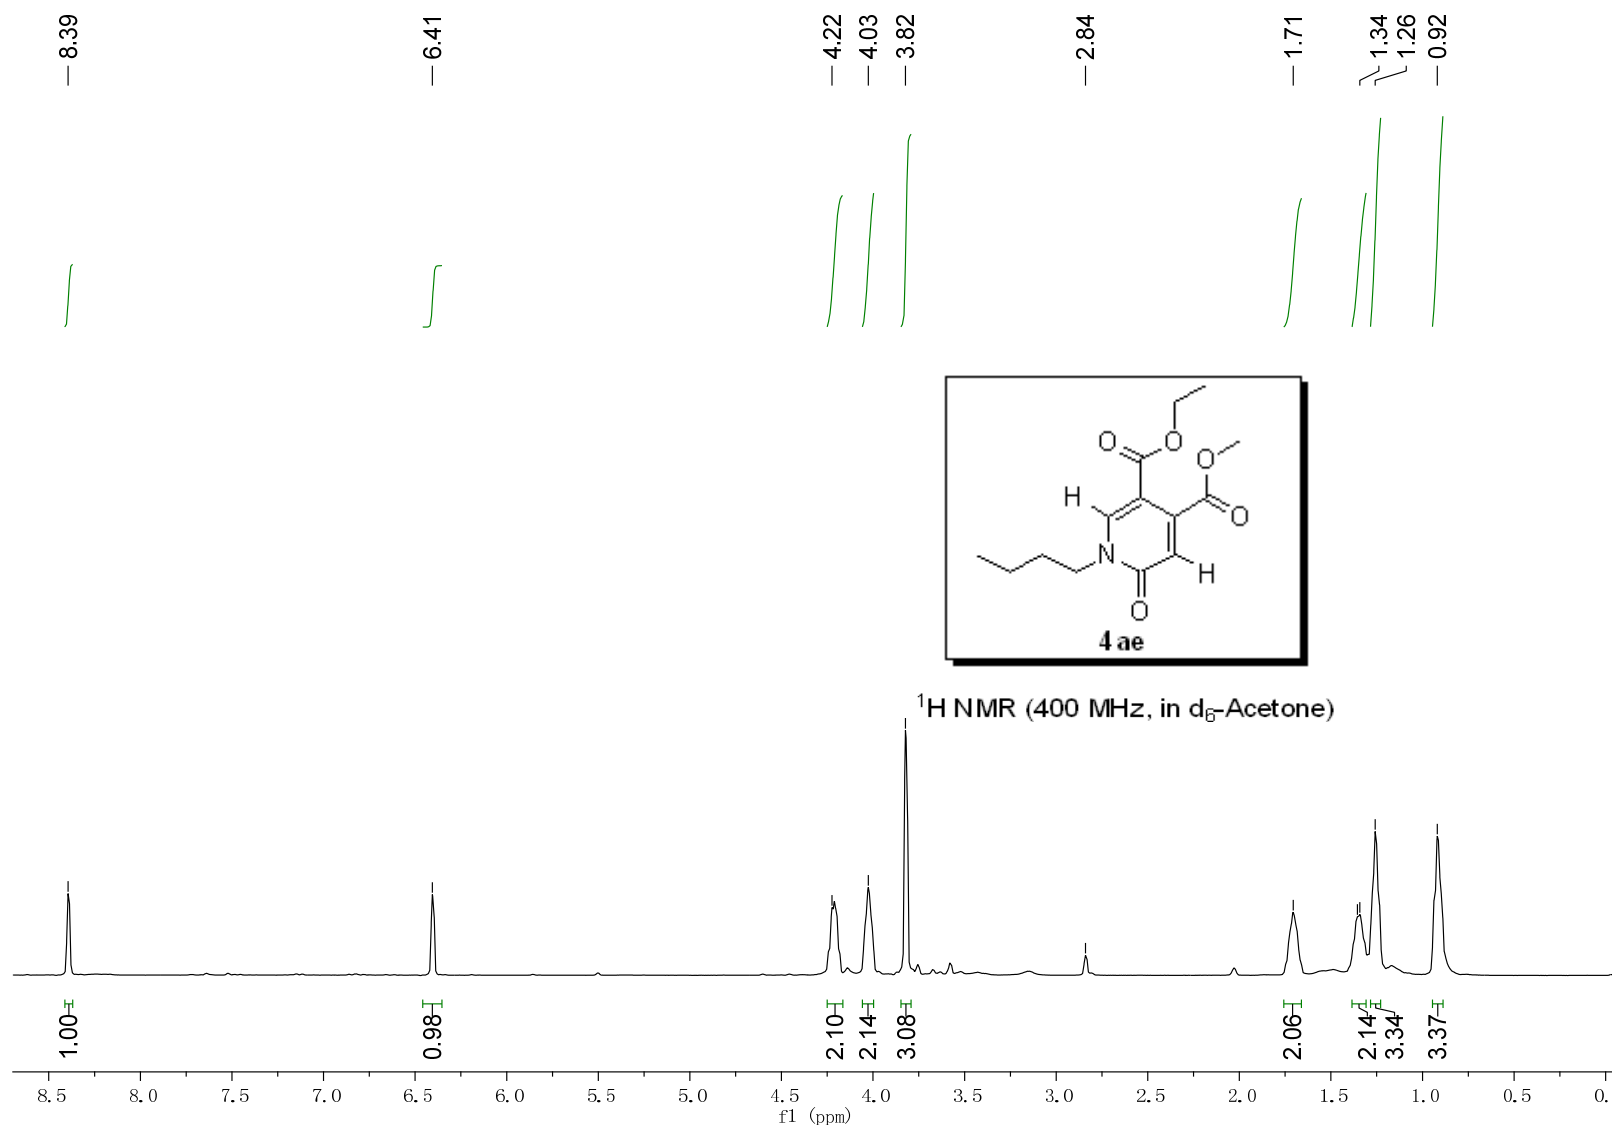

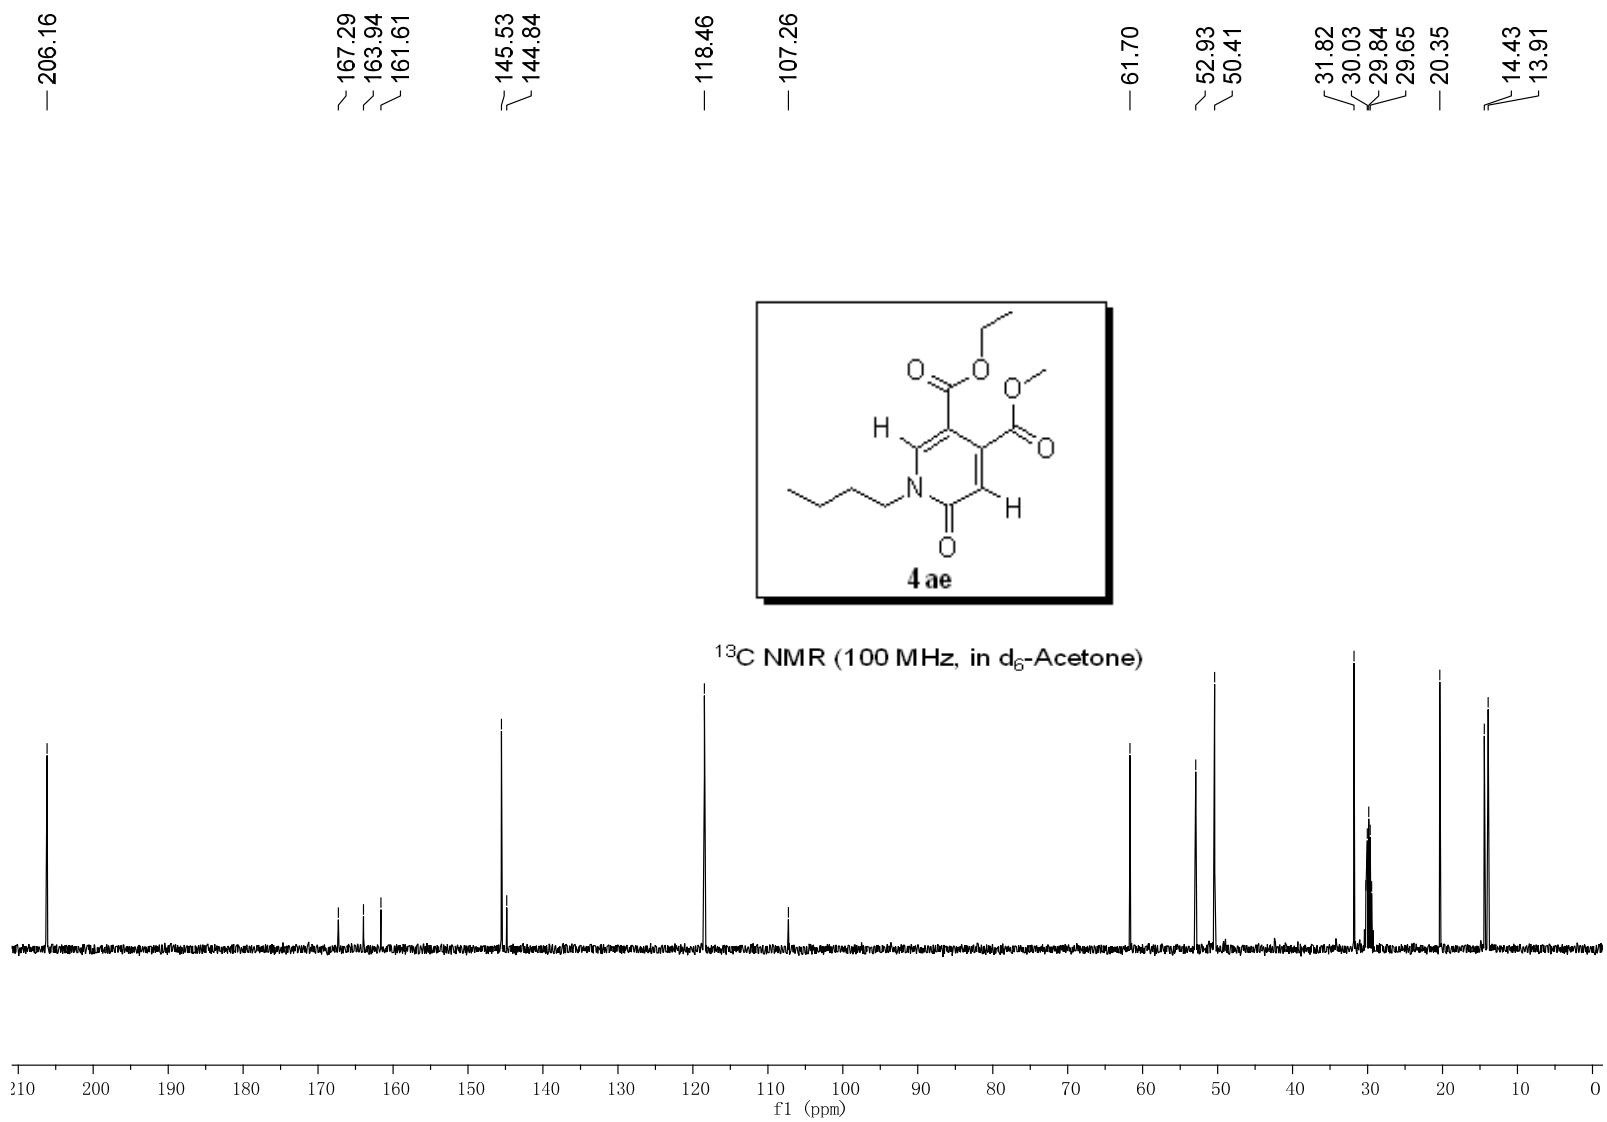

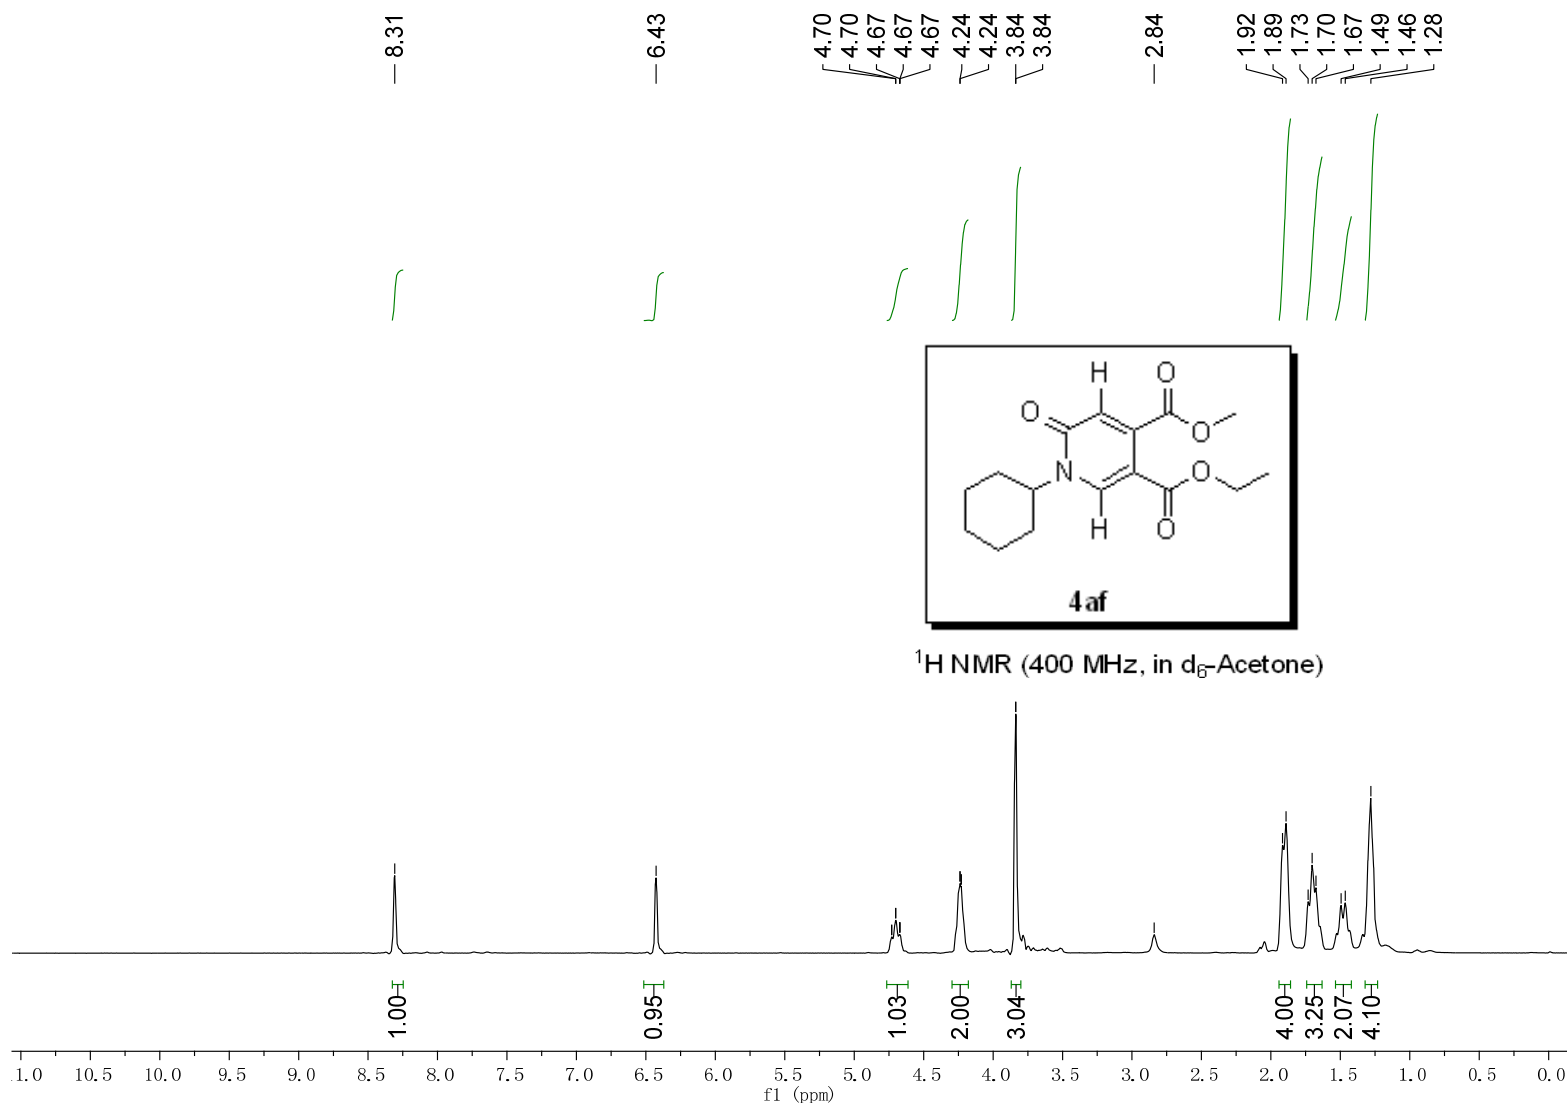

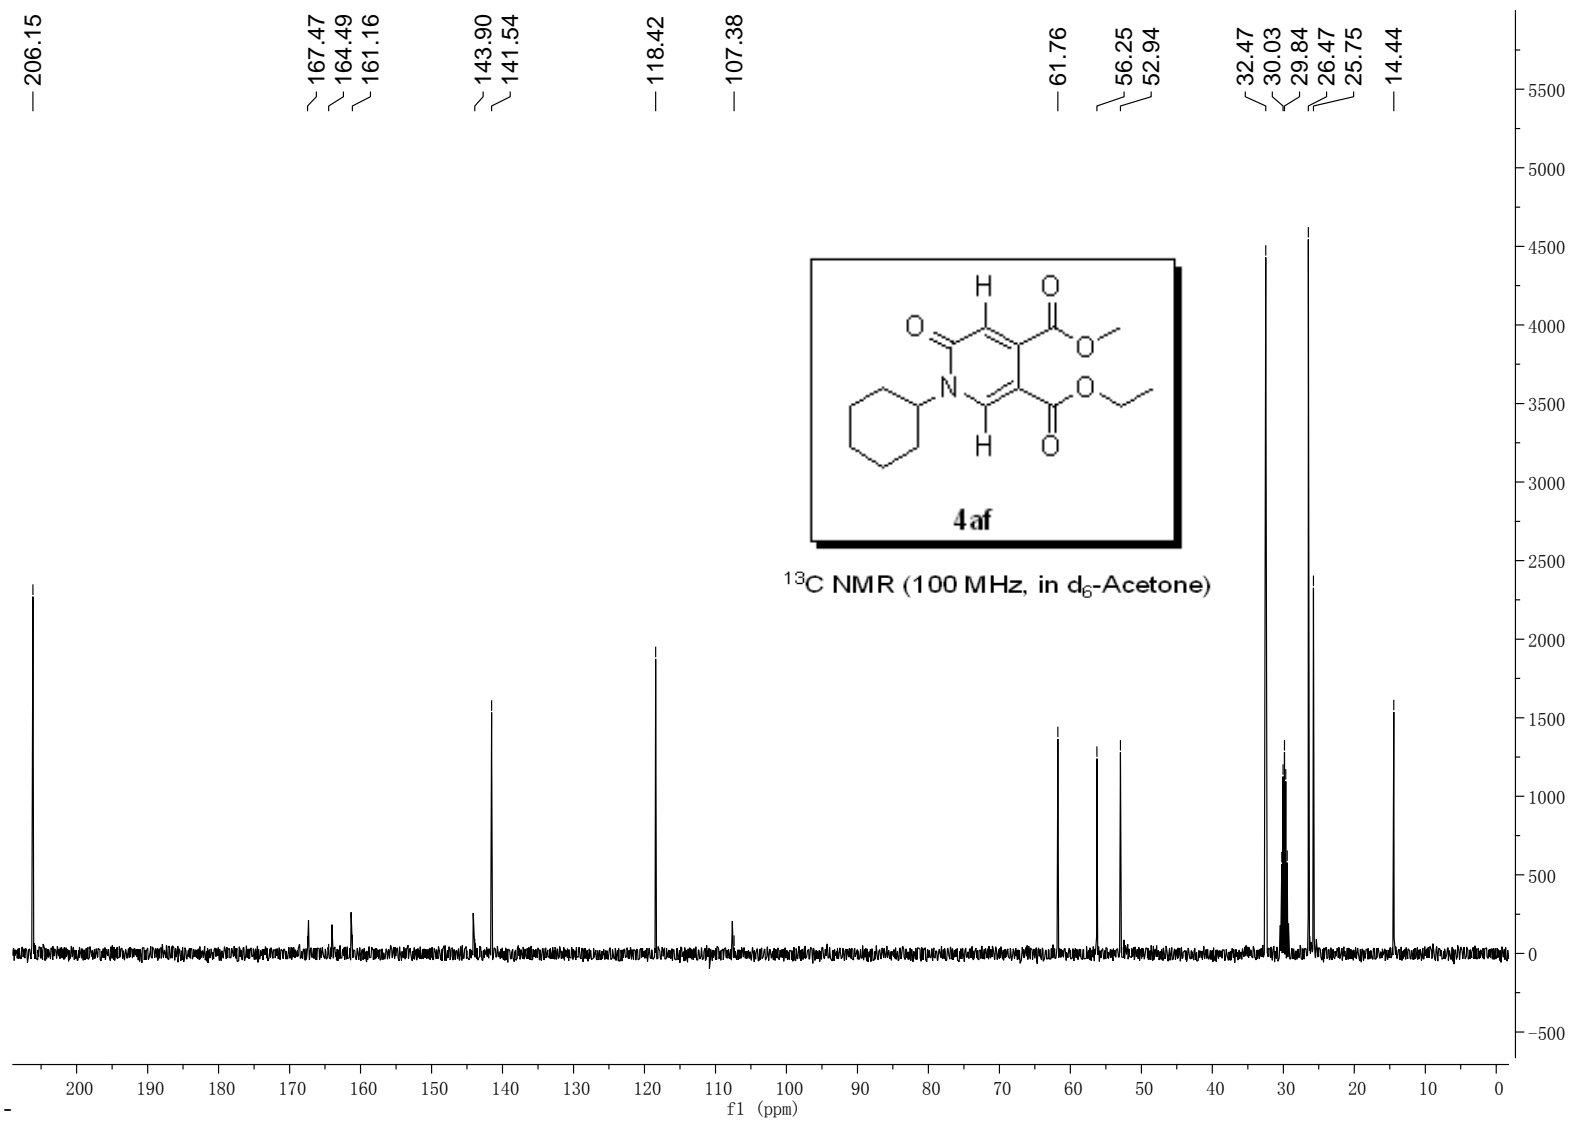

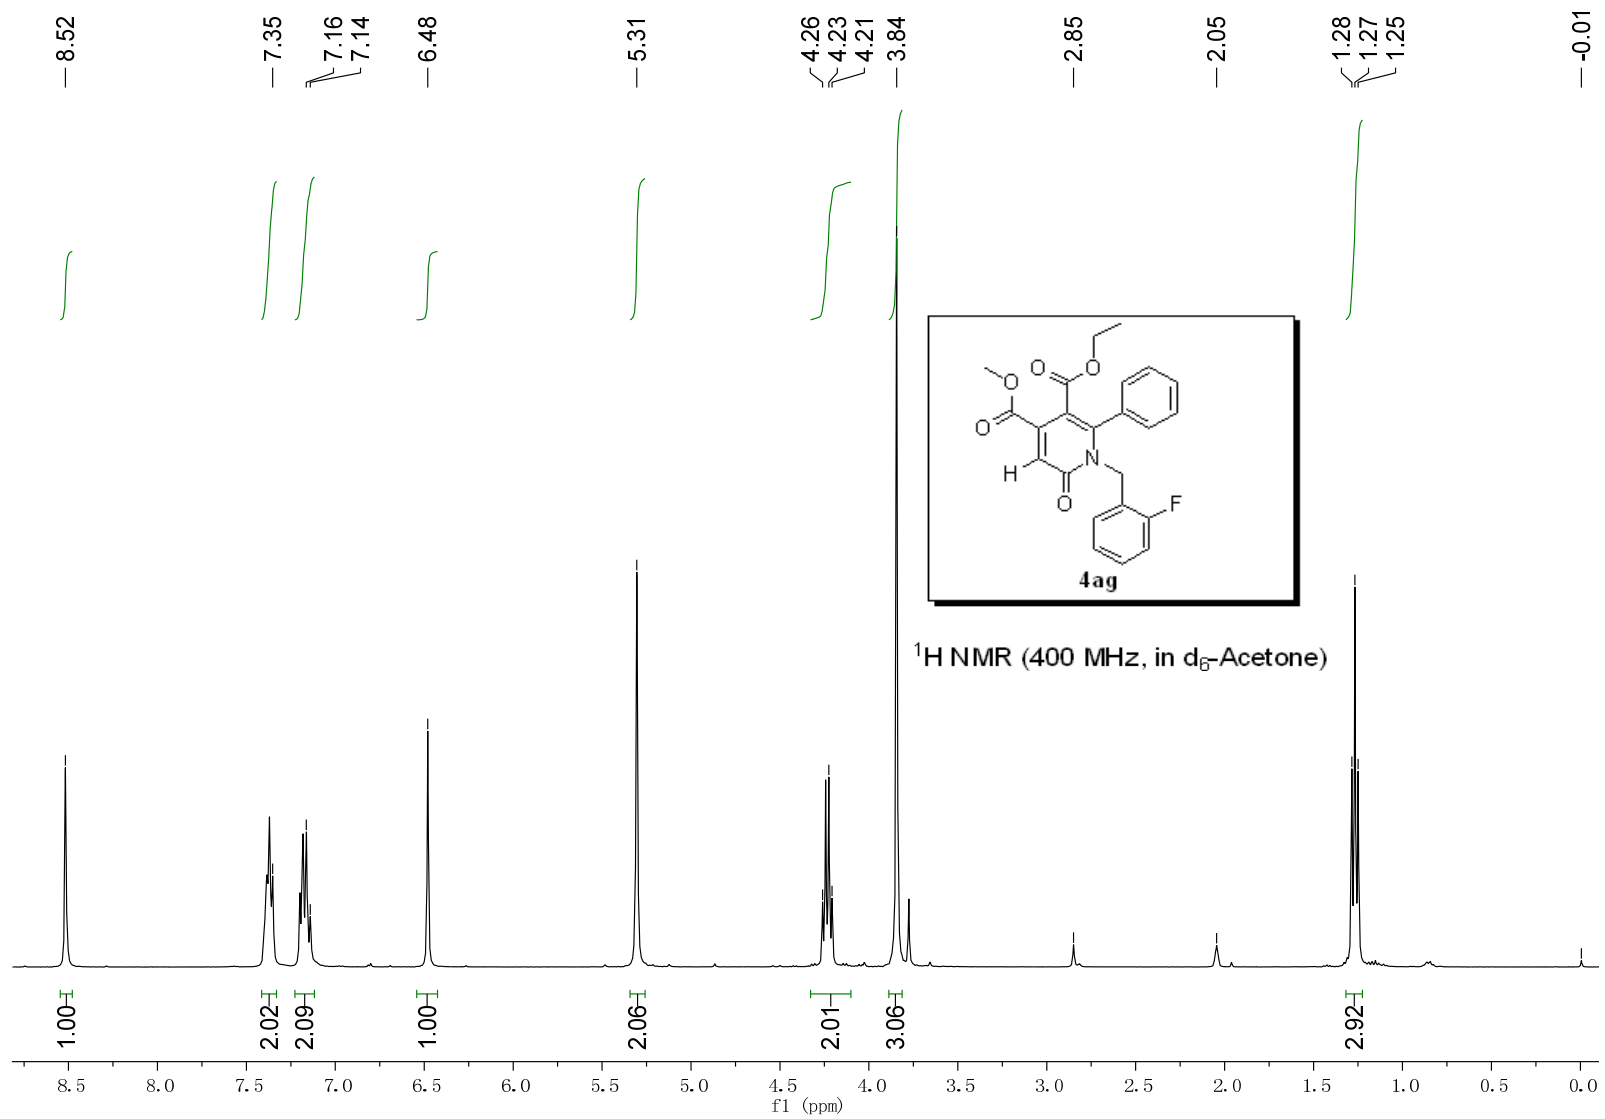



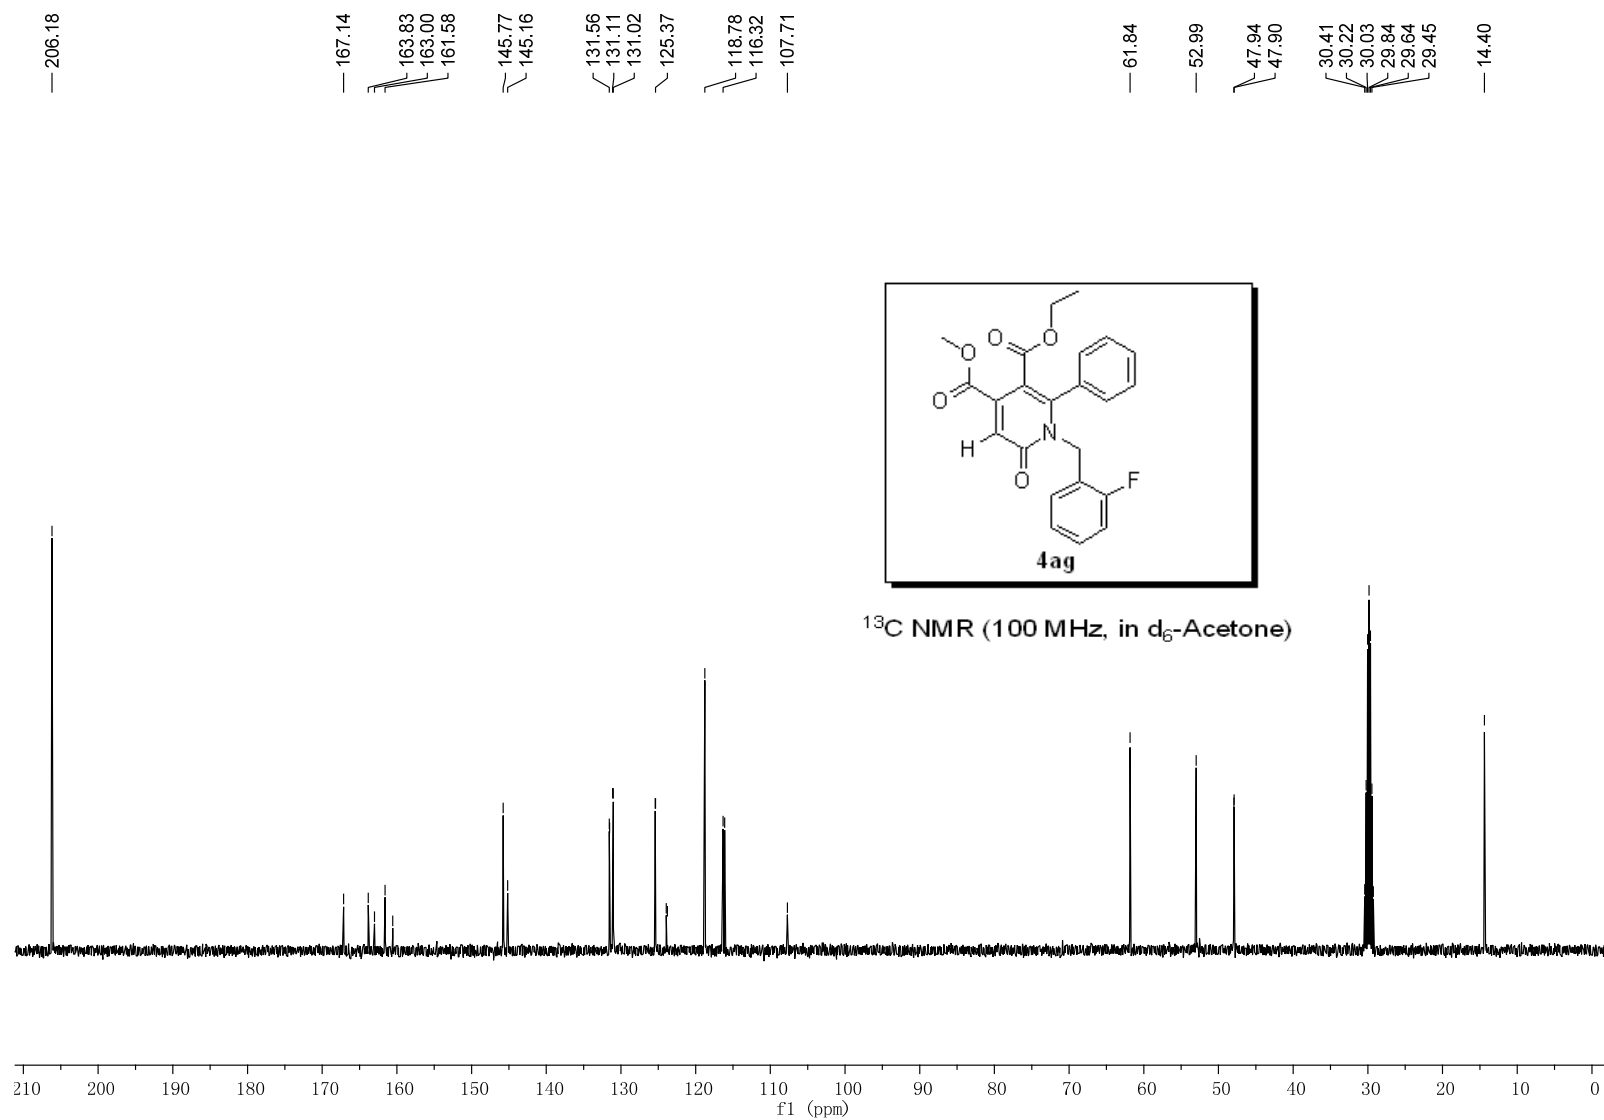

— -119.49

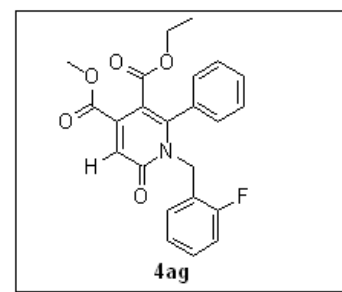

$^{19}\text{F}$  NMR (377 MHz, in  $\text{d}_6$ -Acetone)

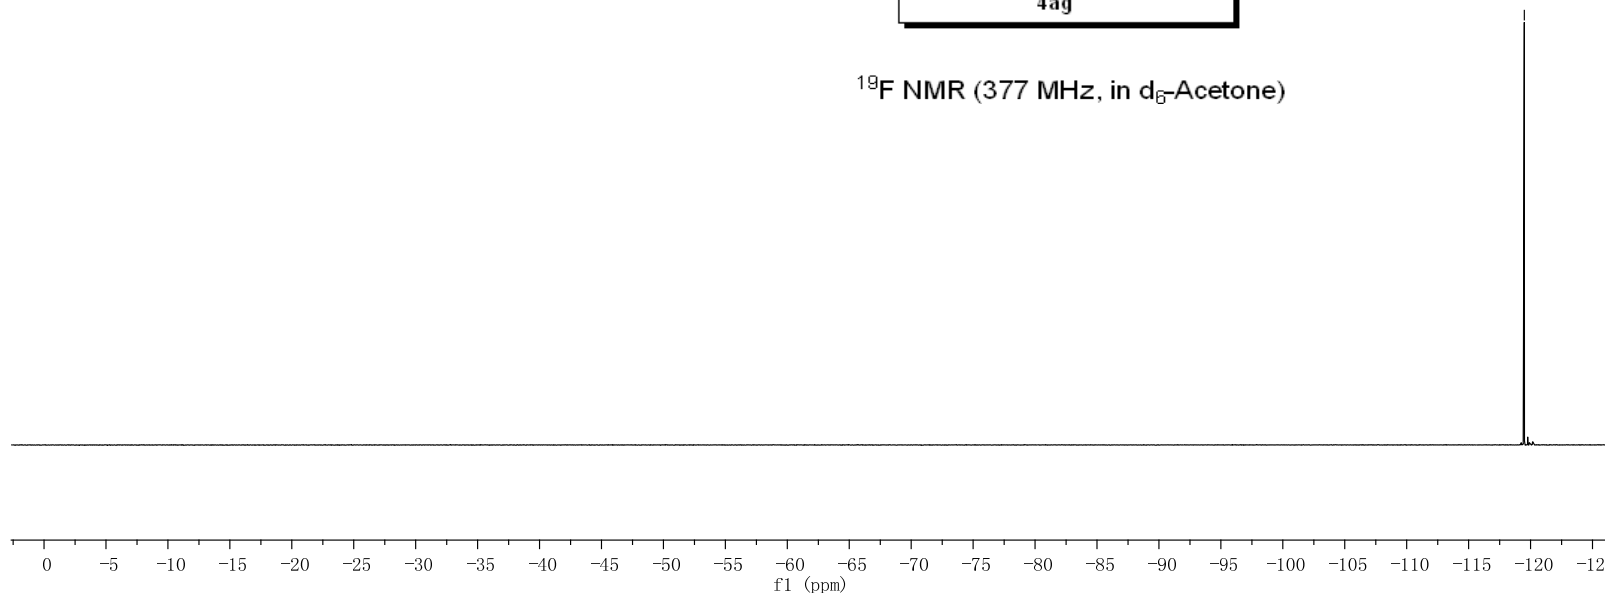

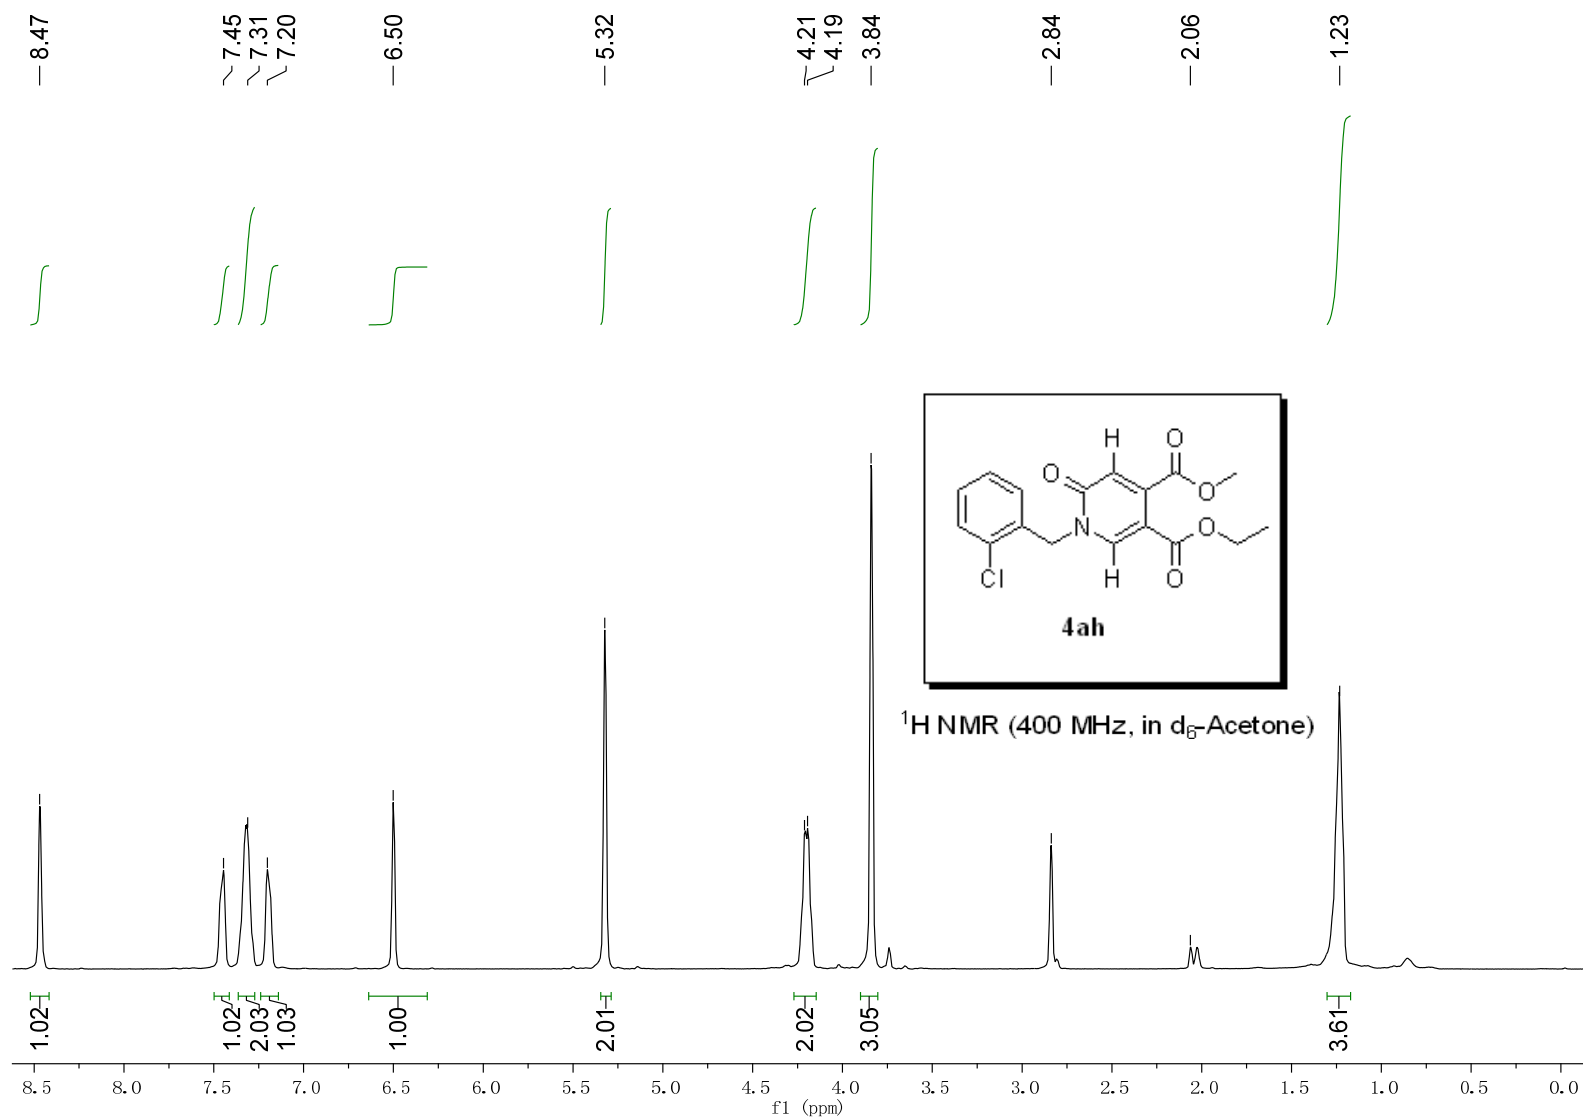

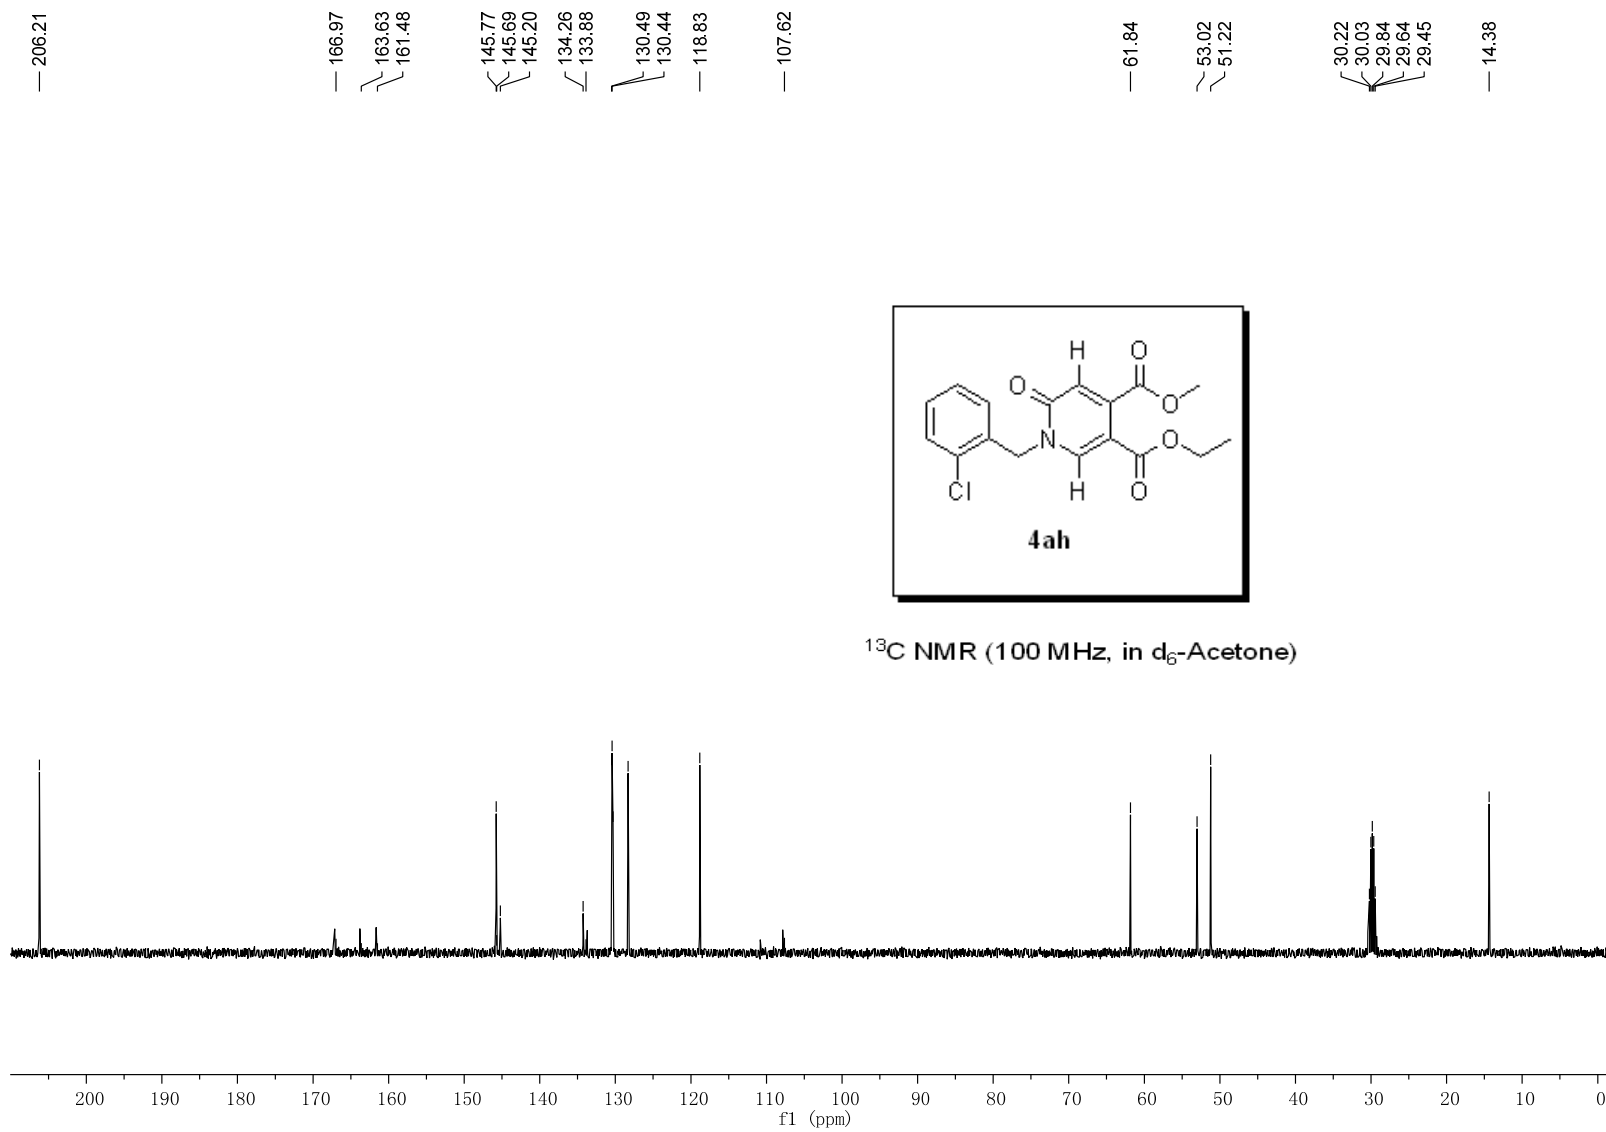

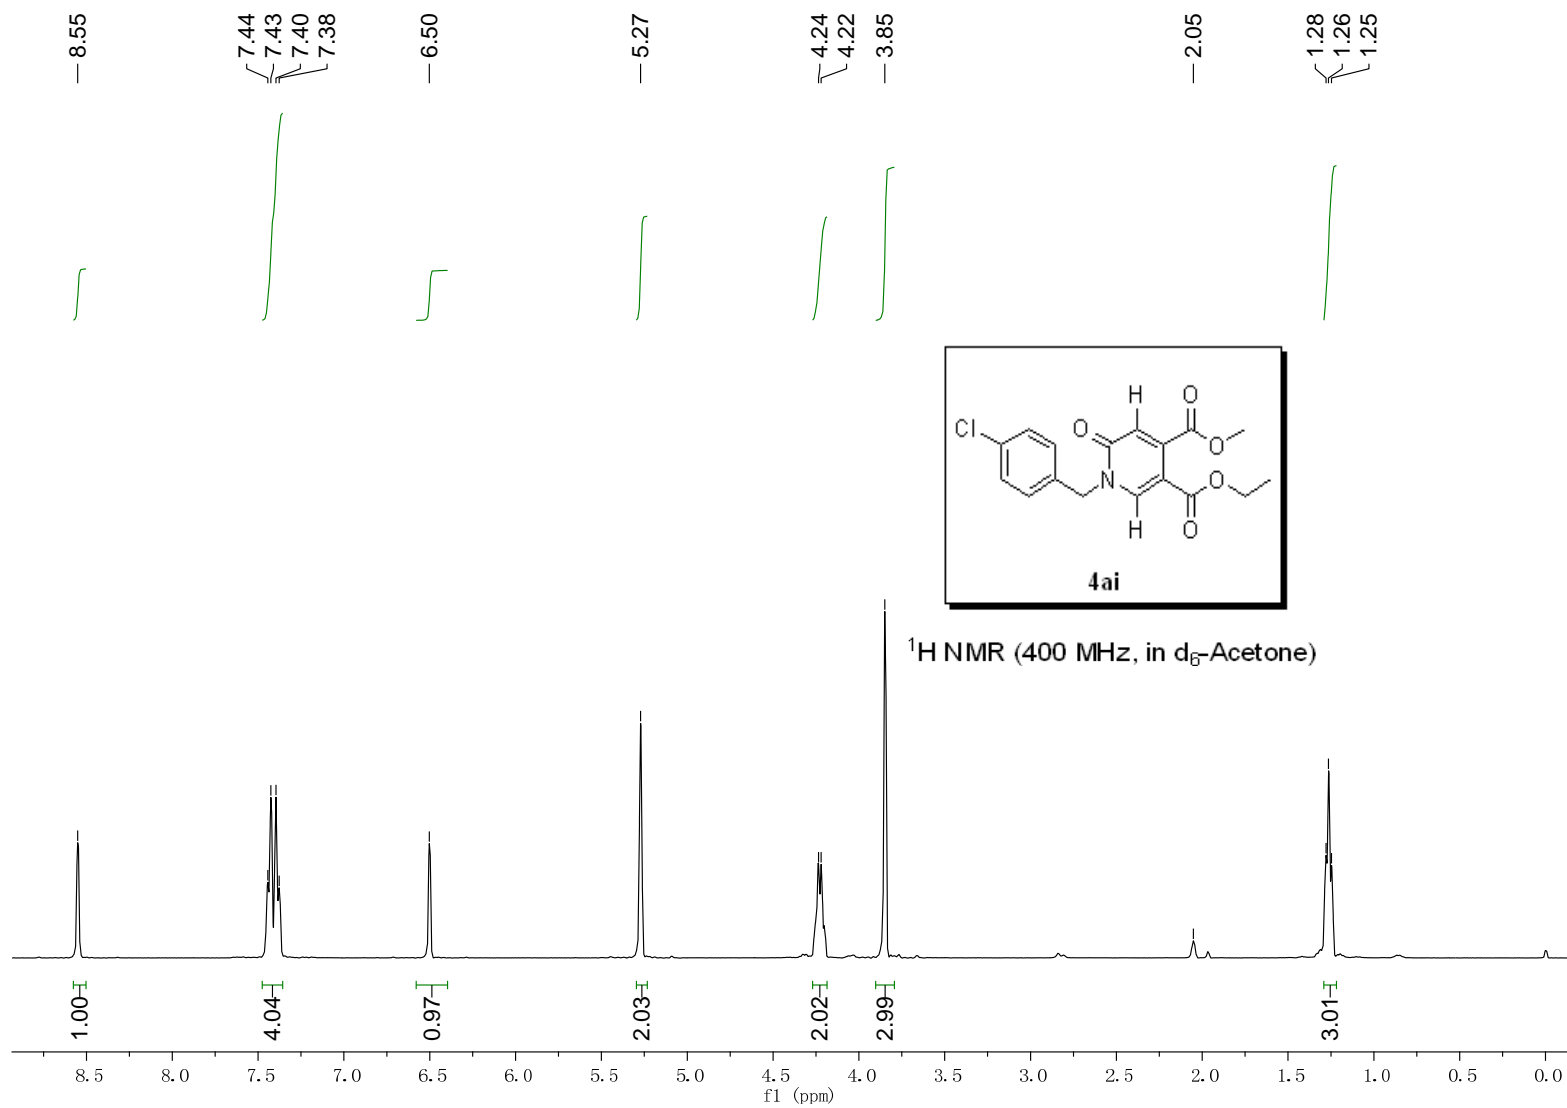

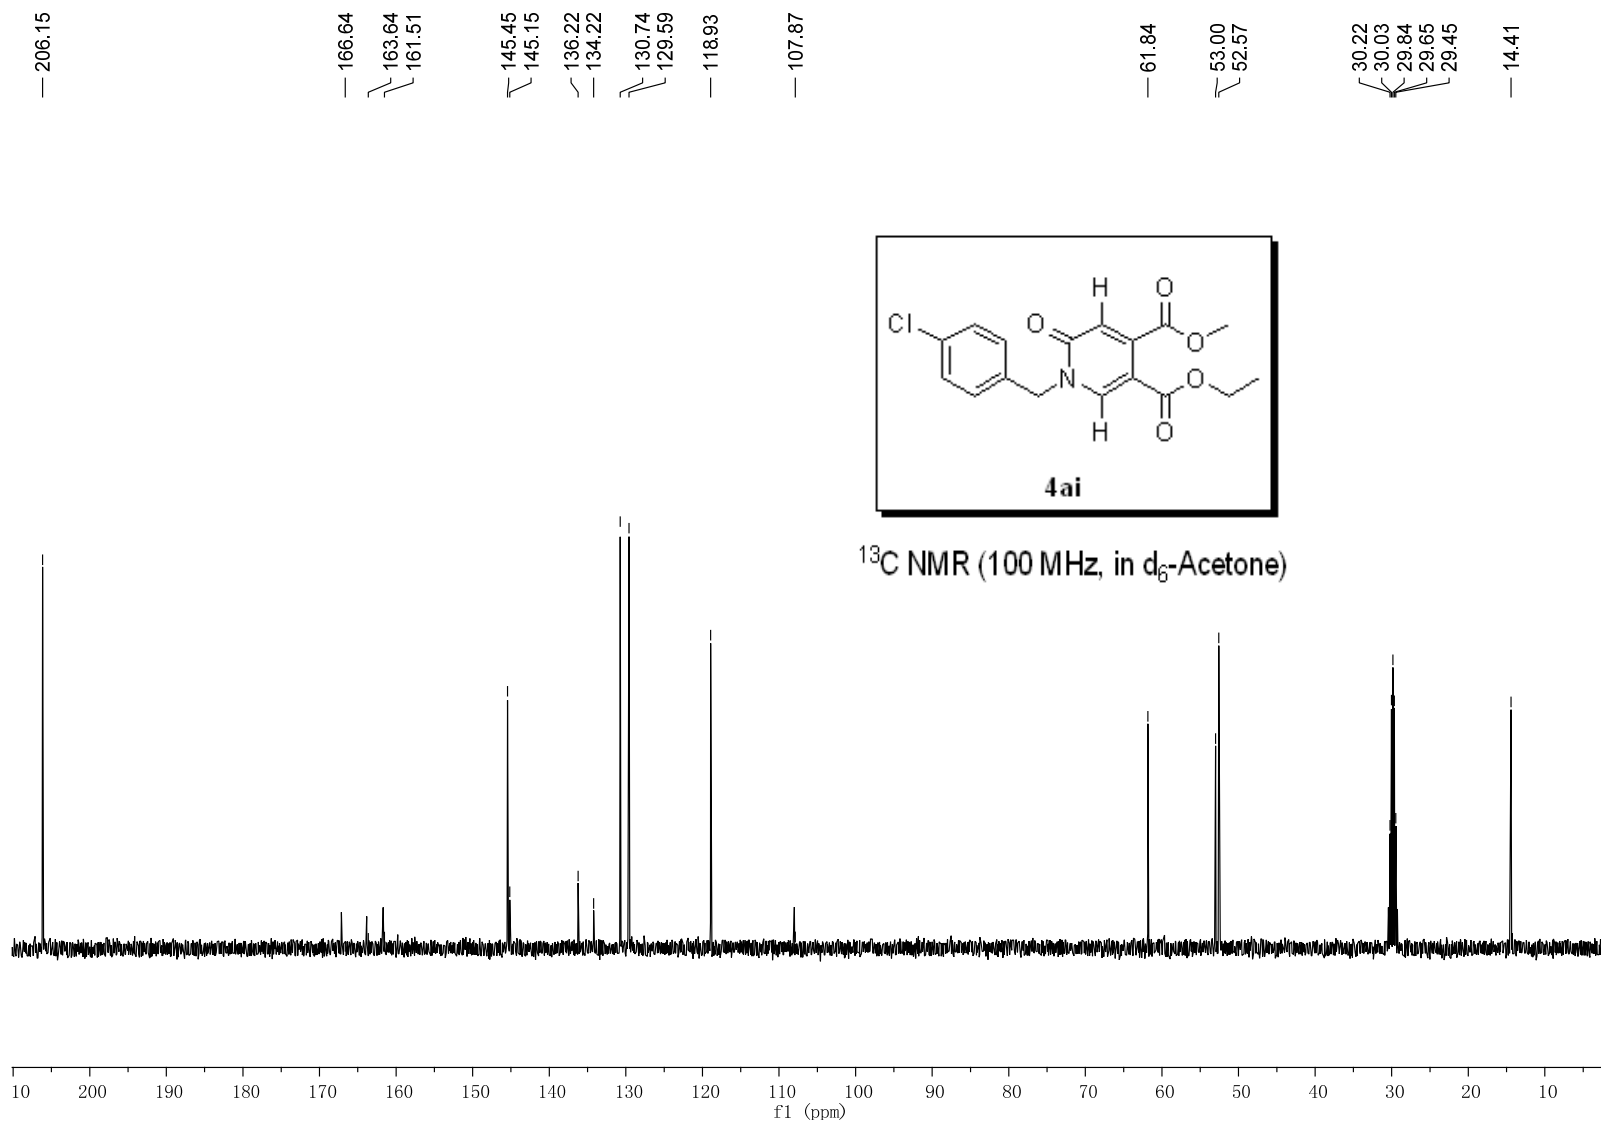

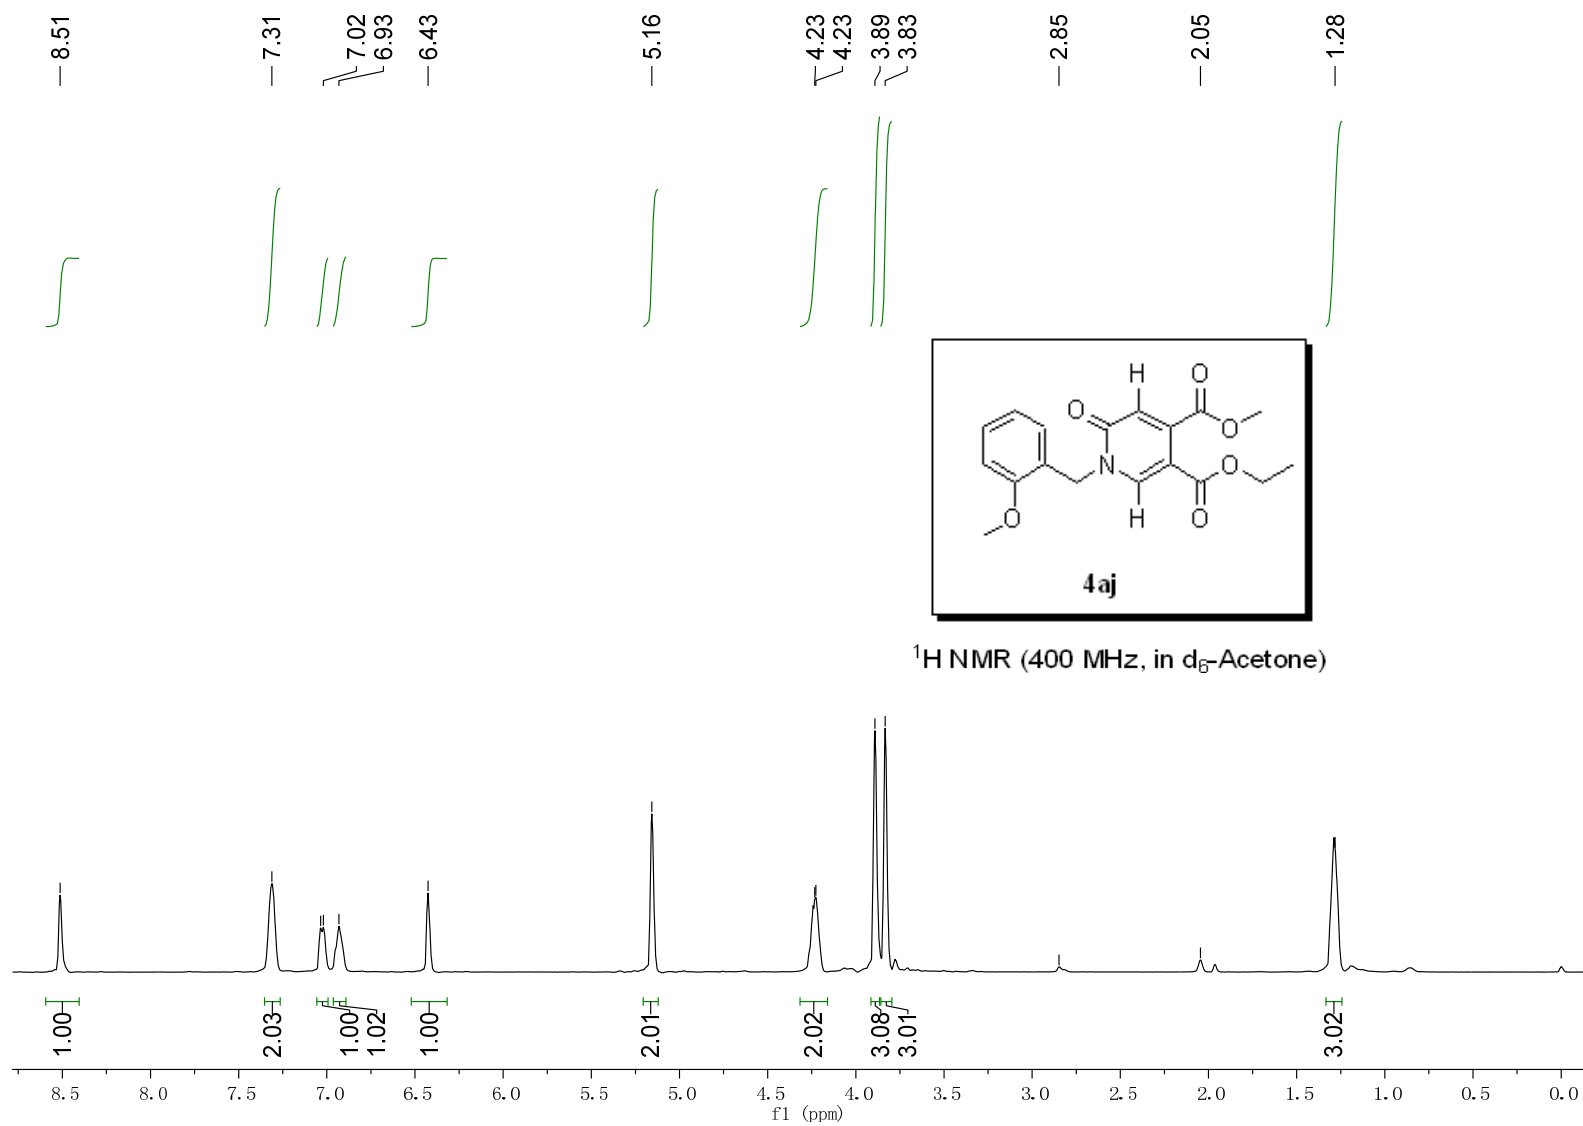

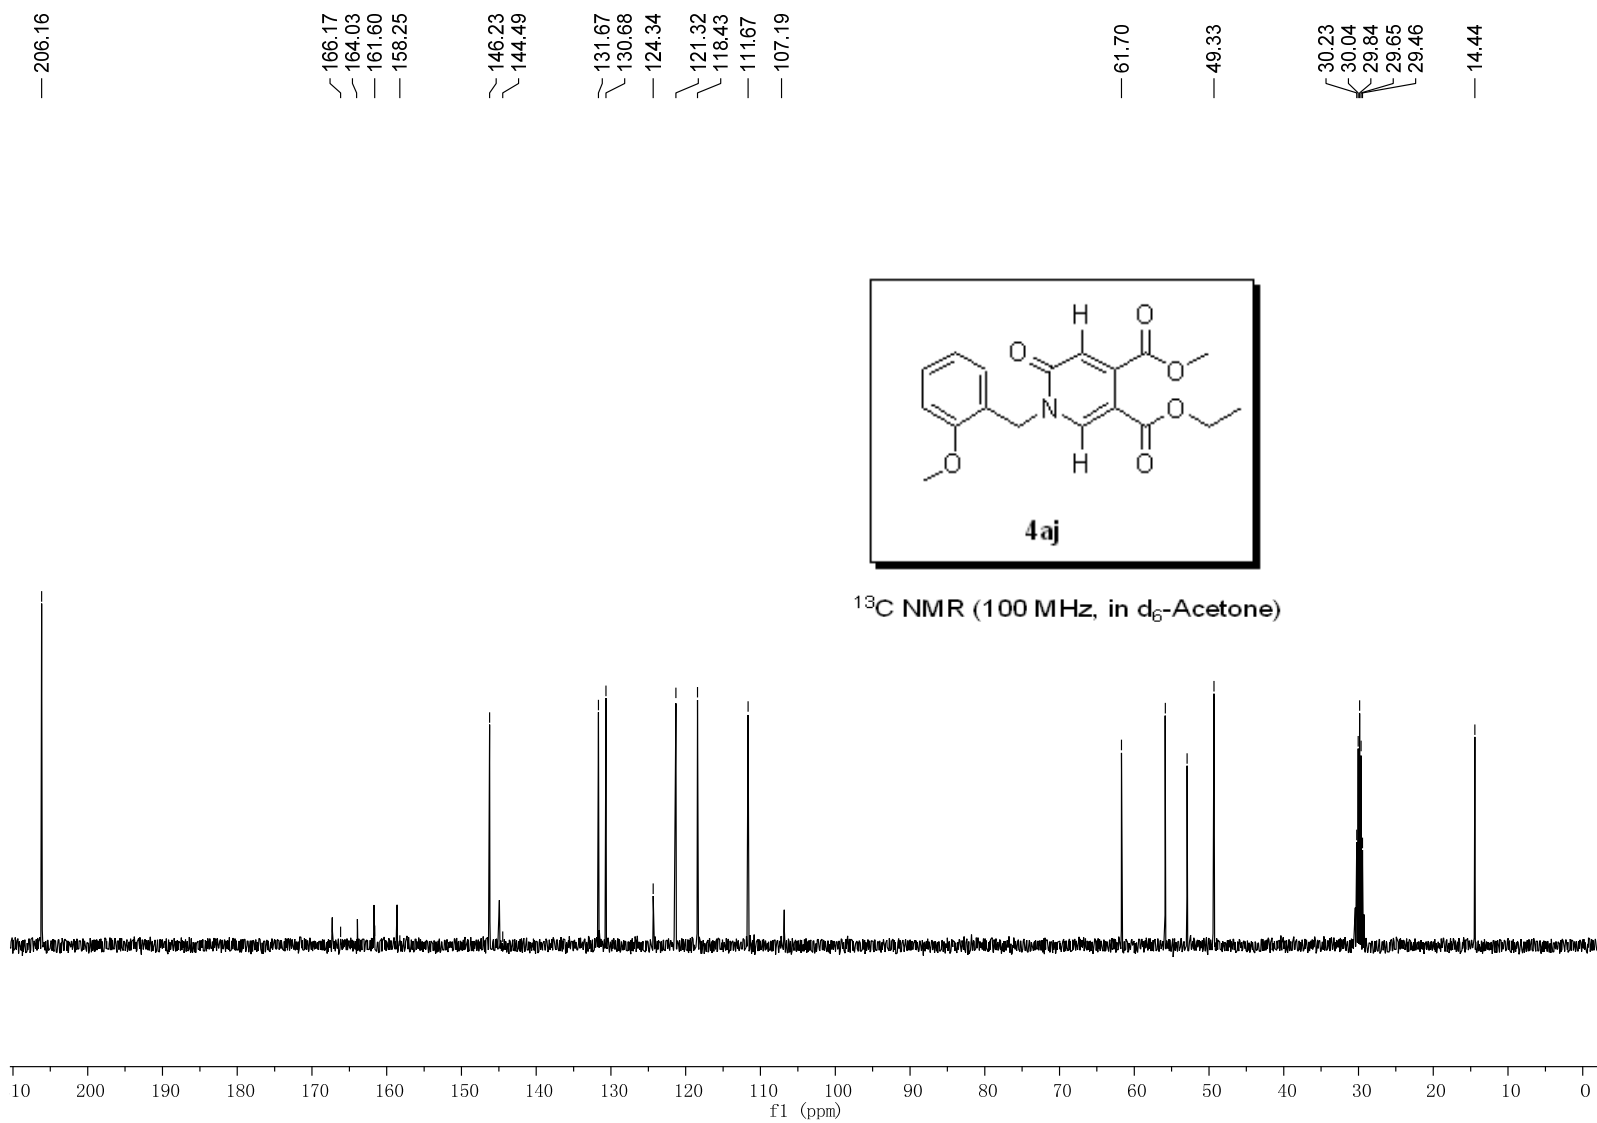



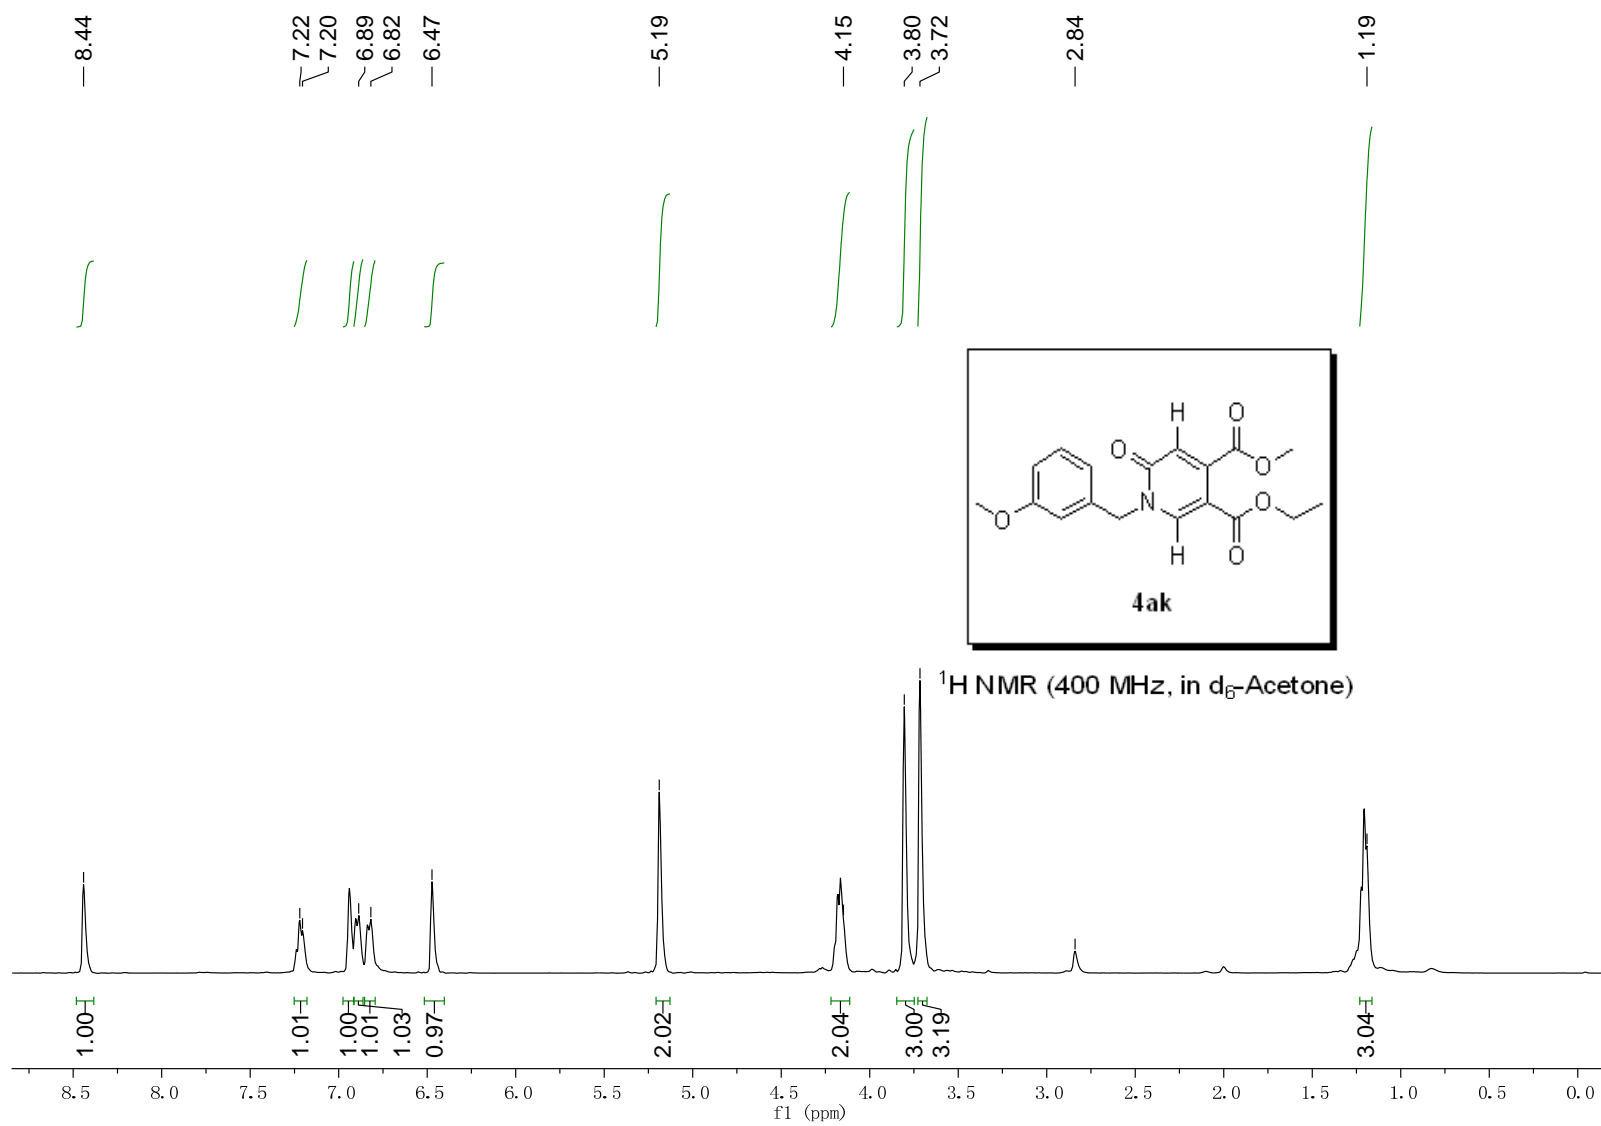

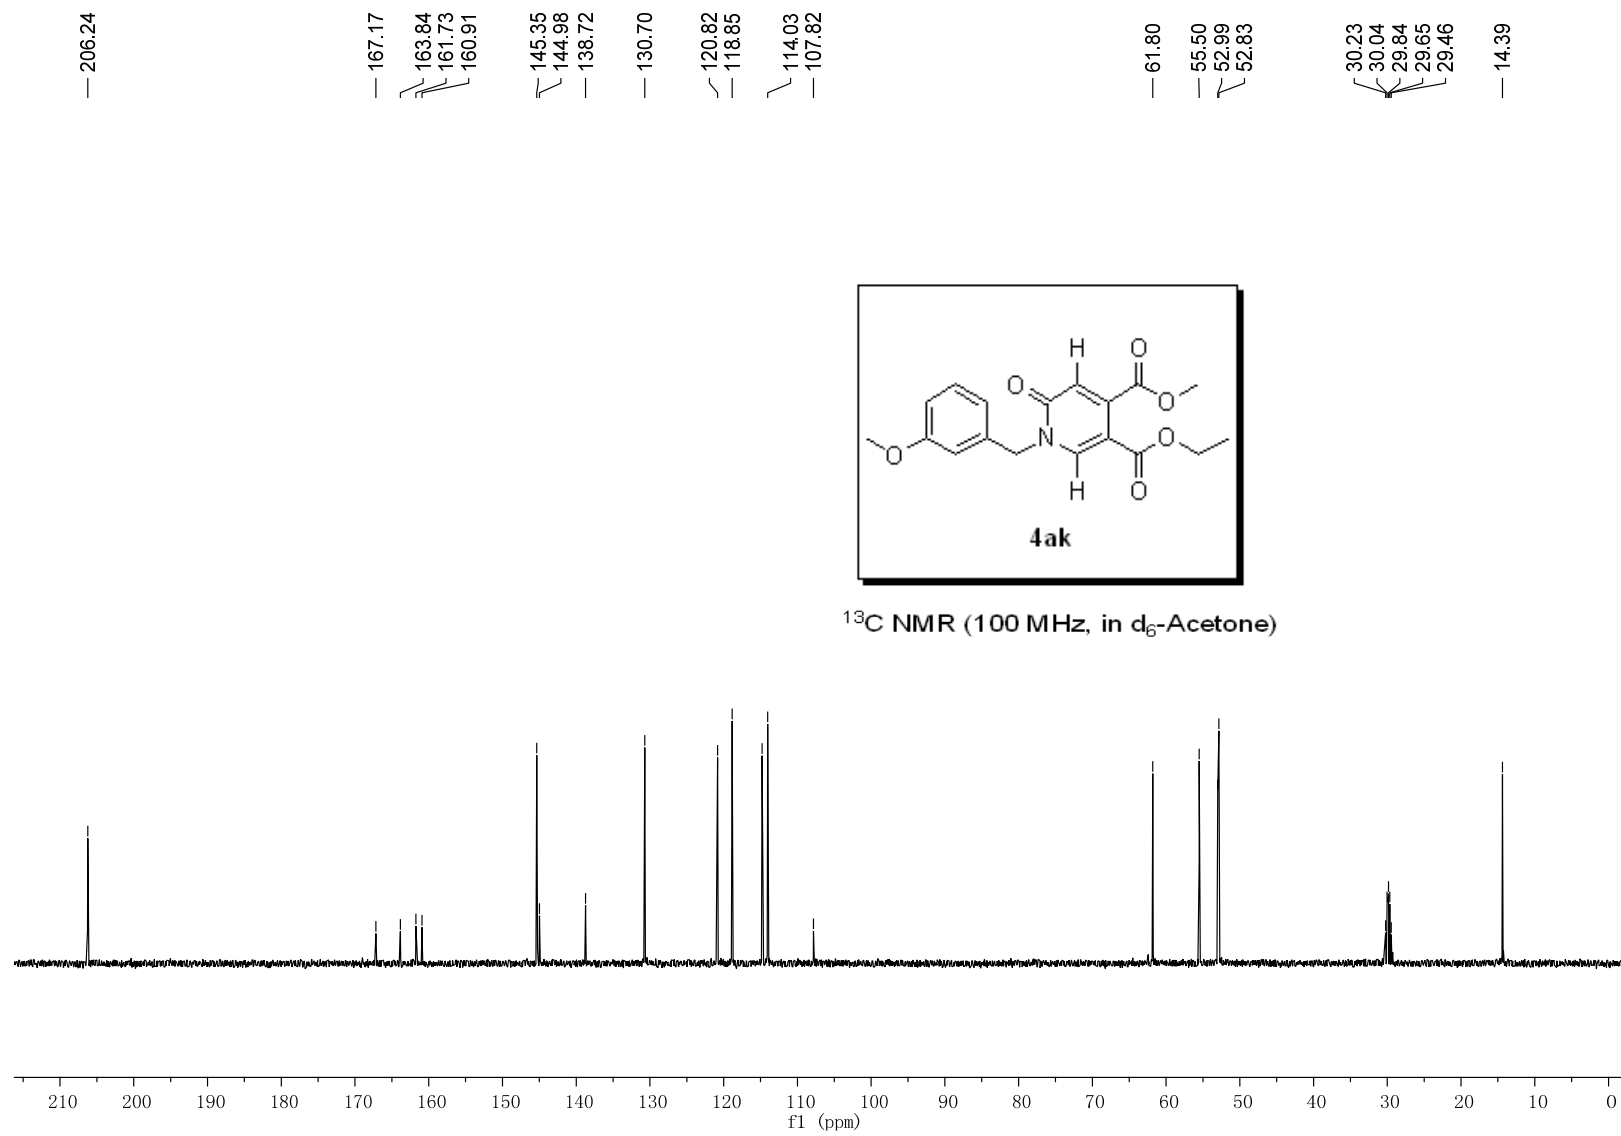

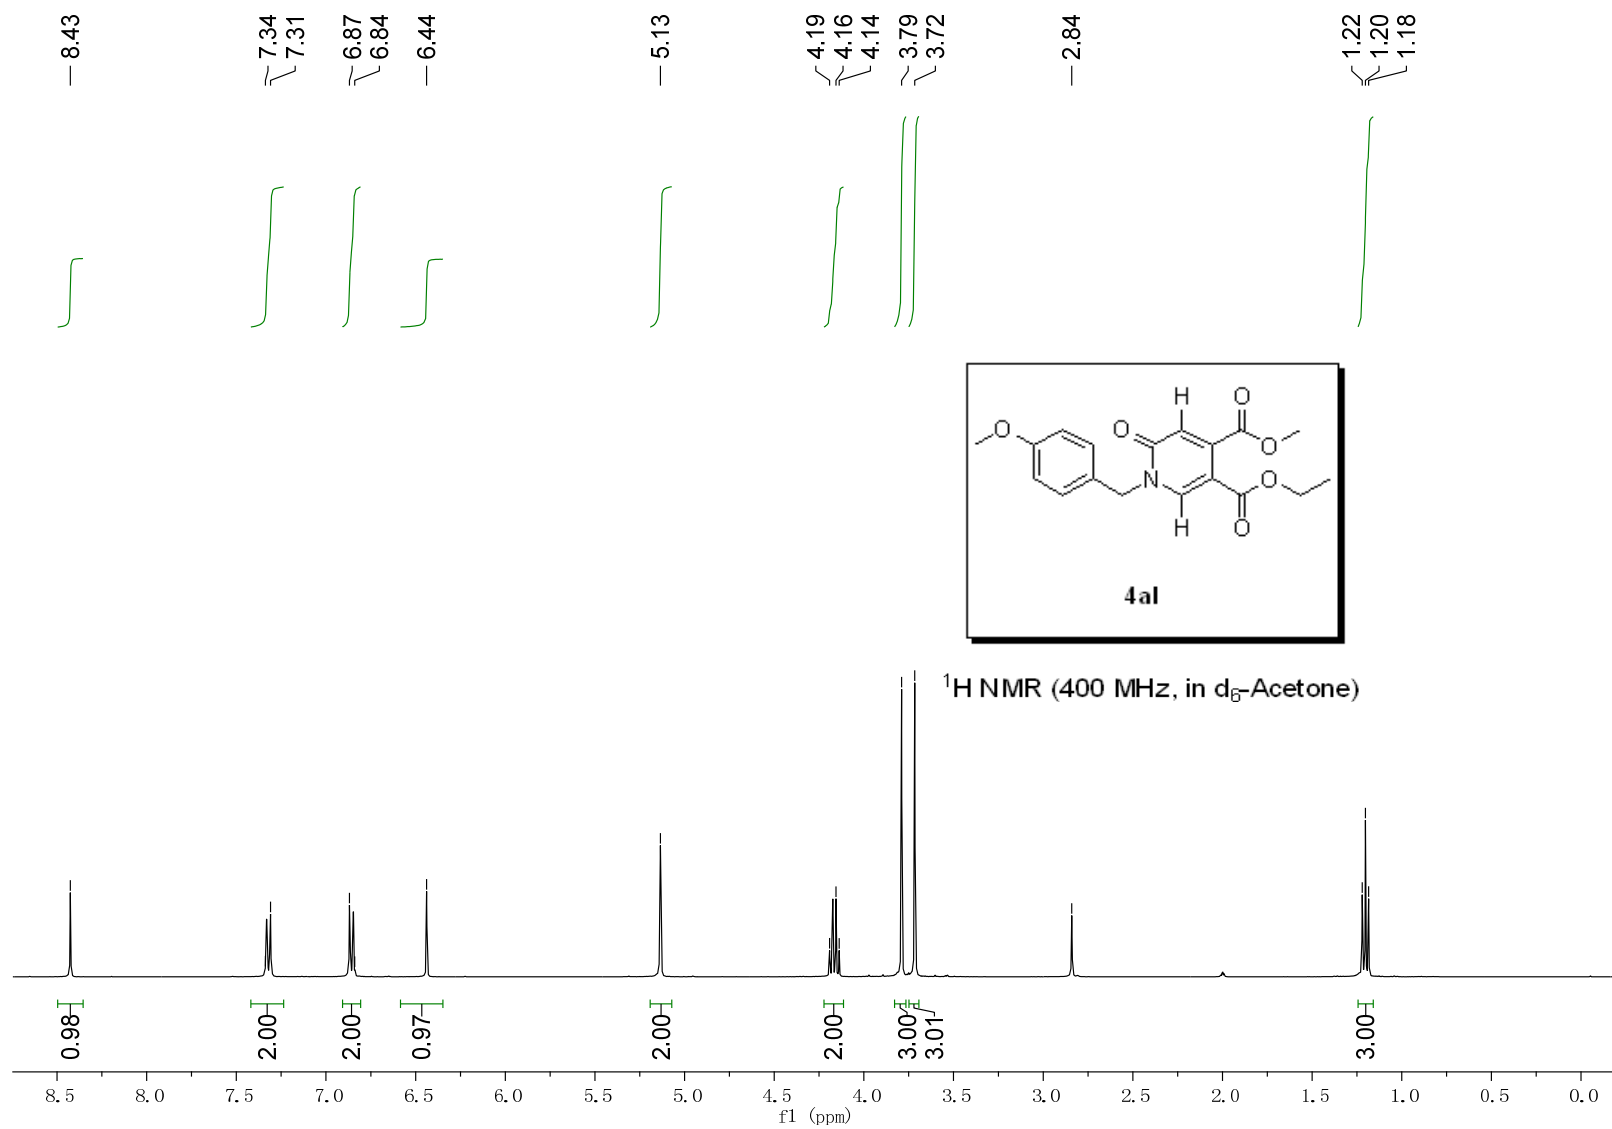

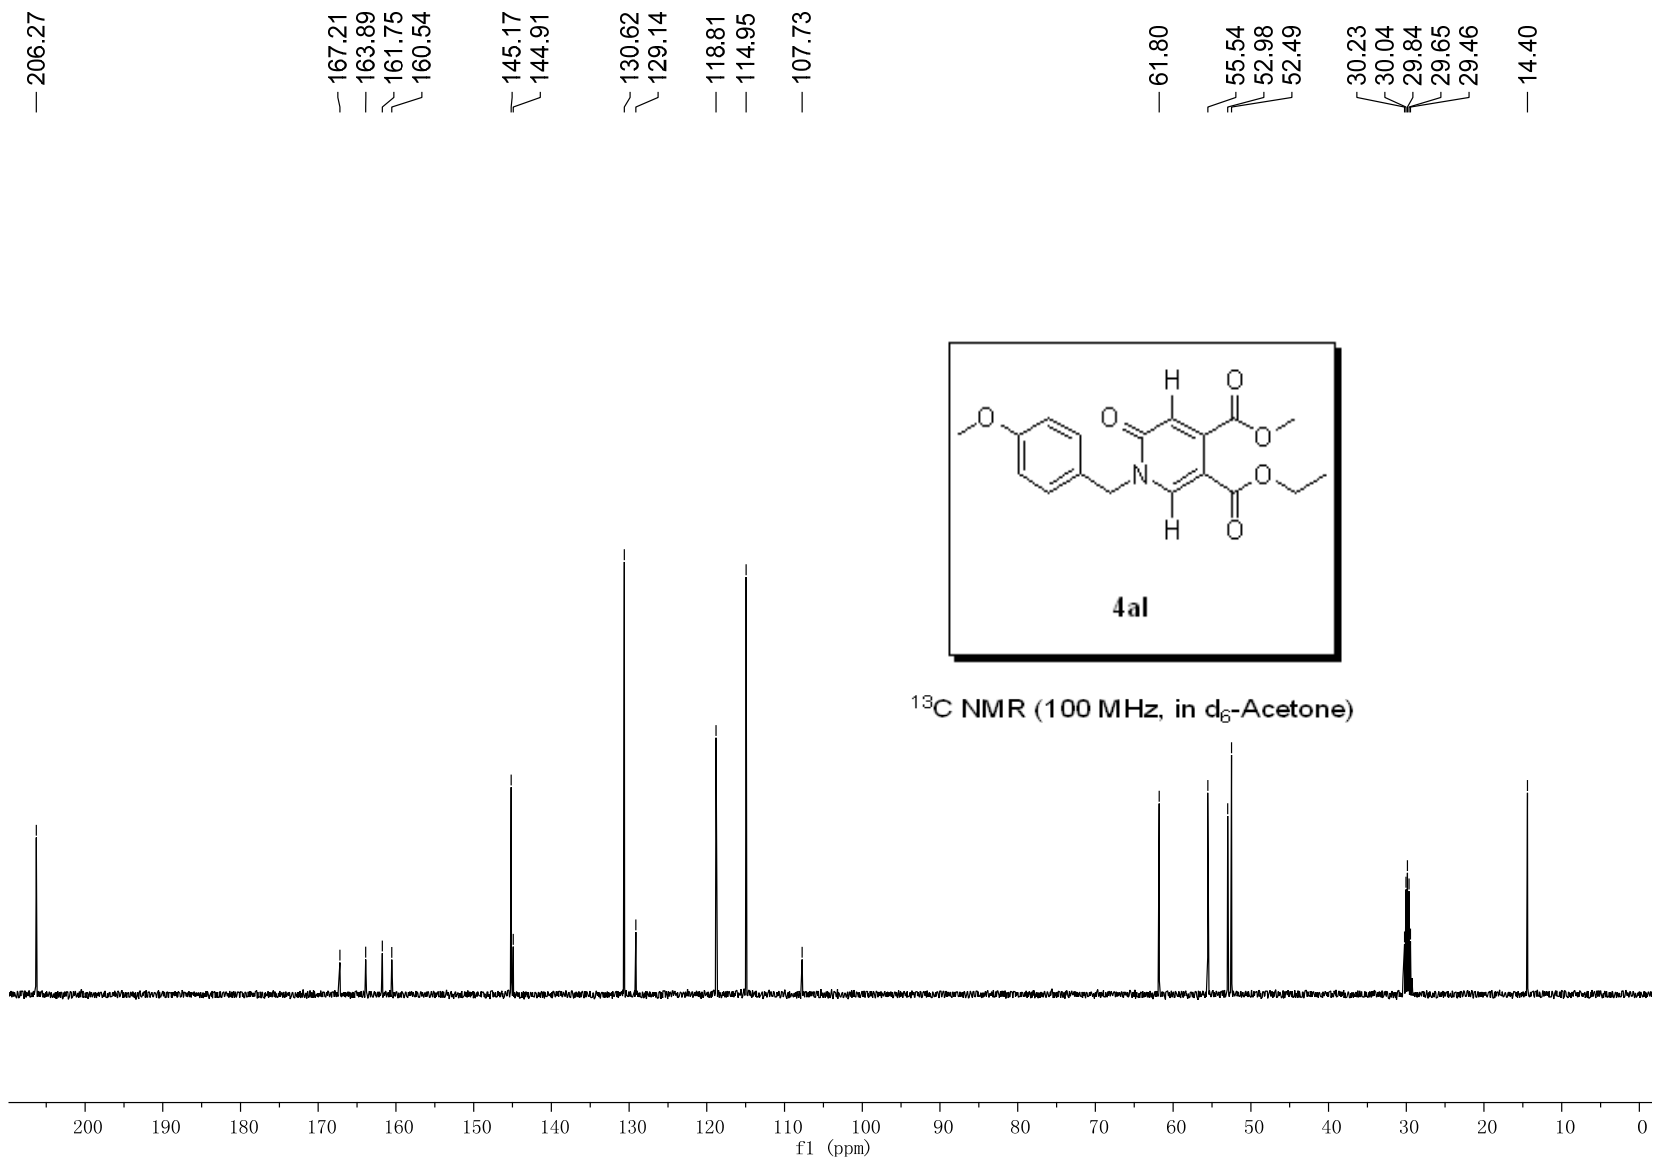

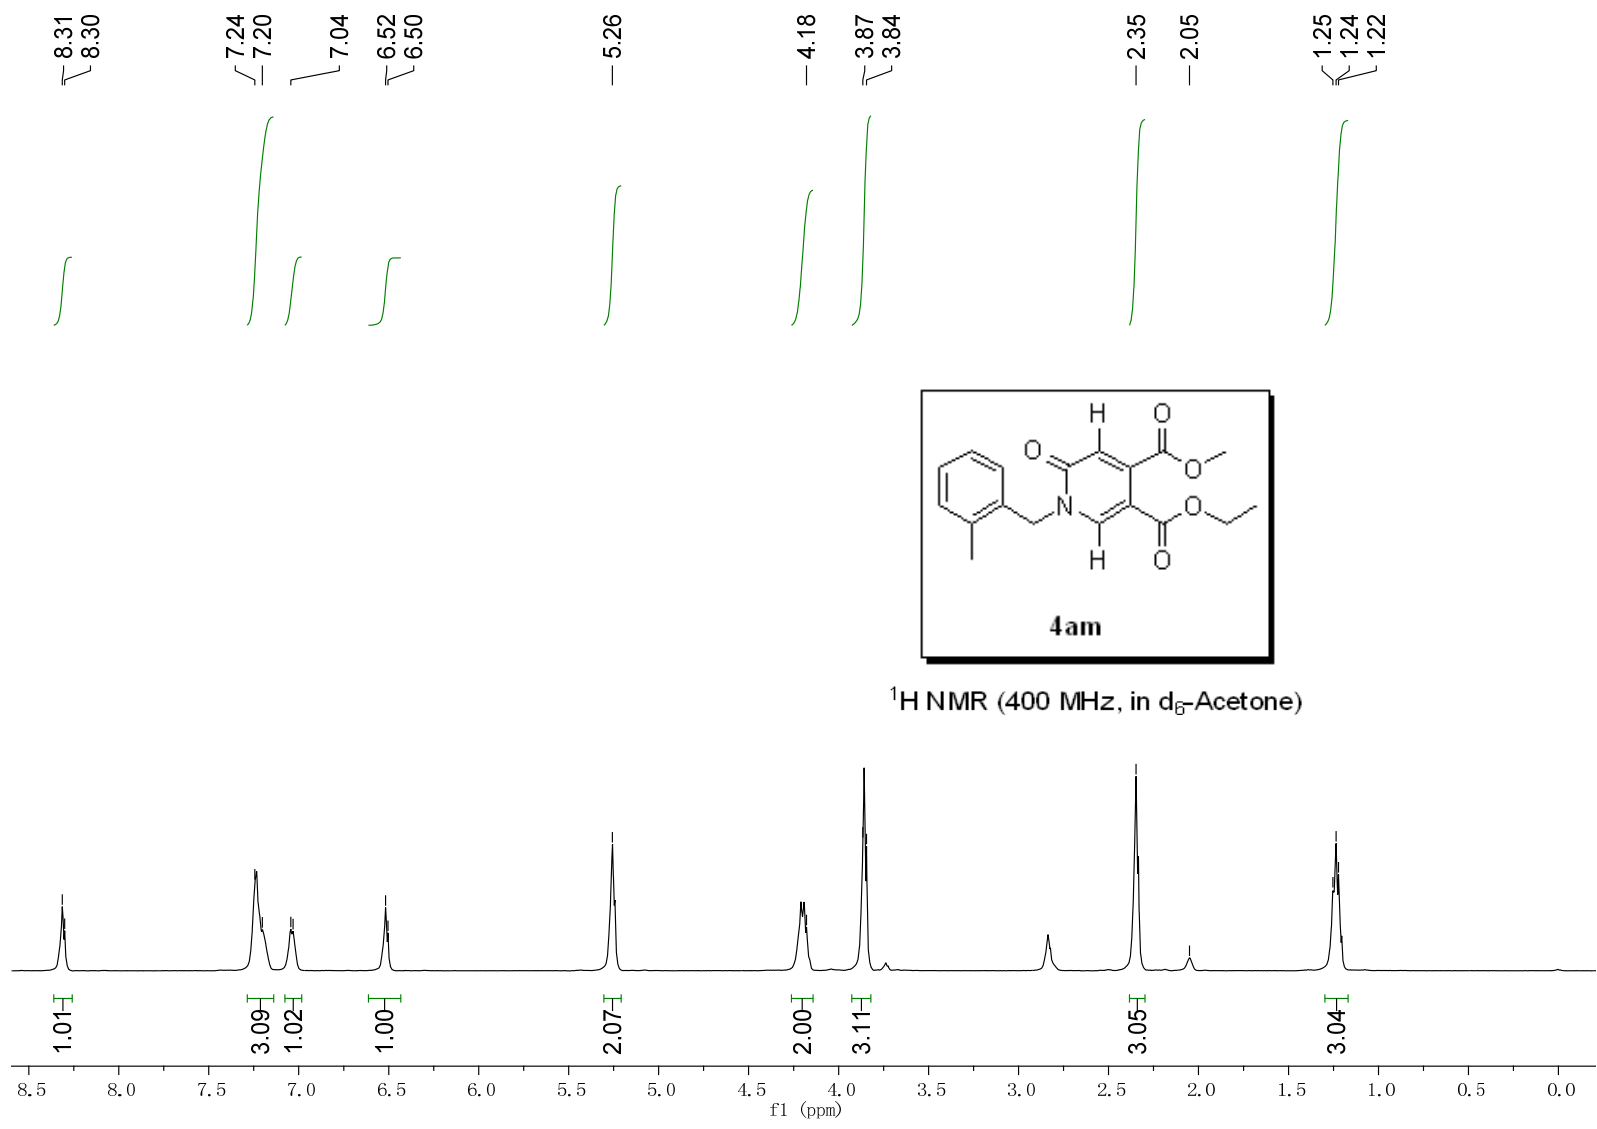

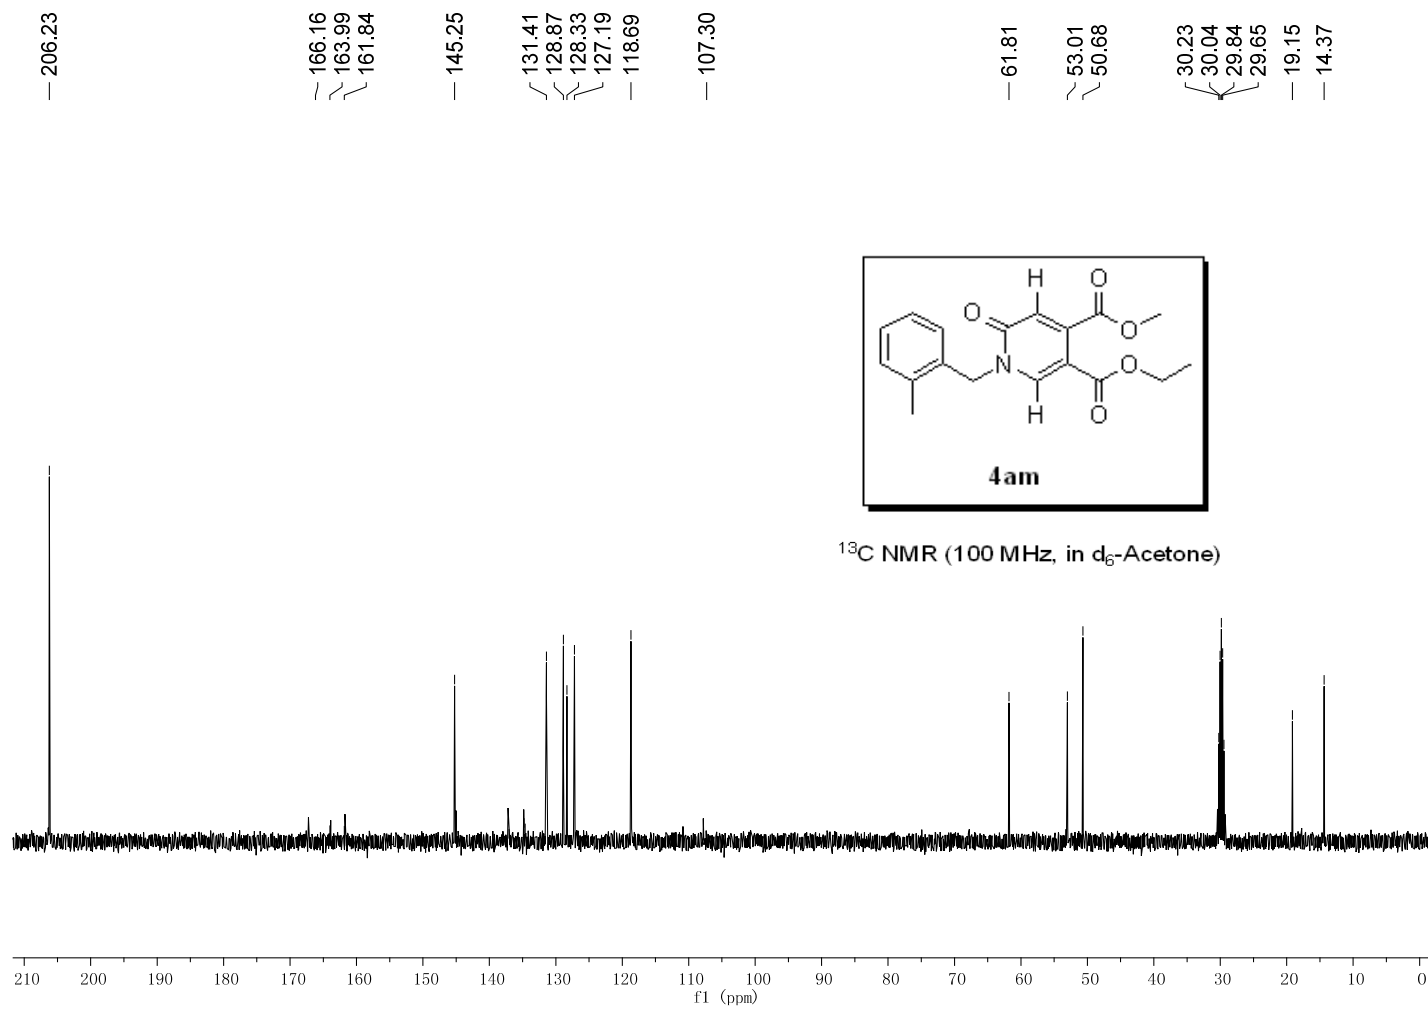

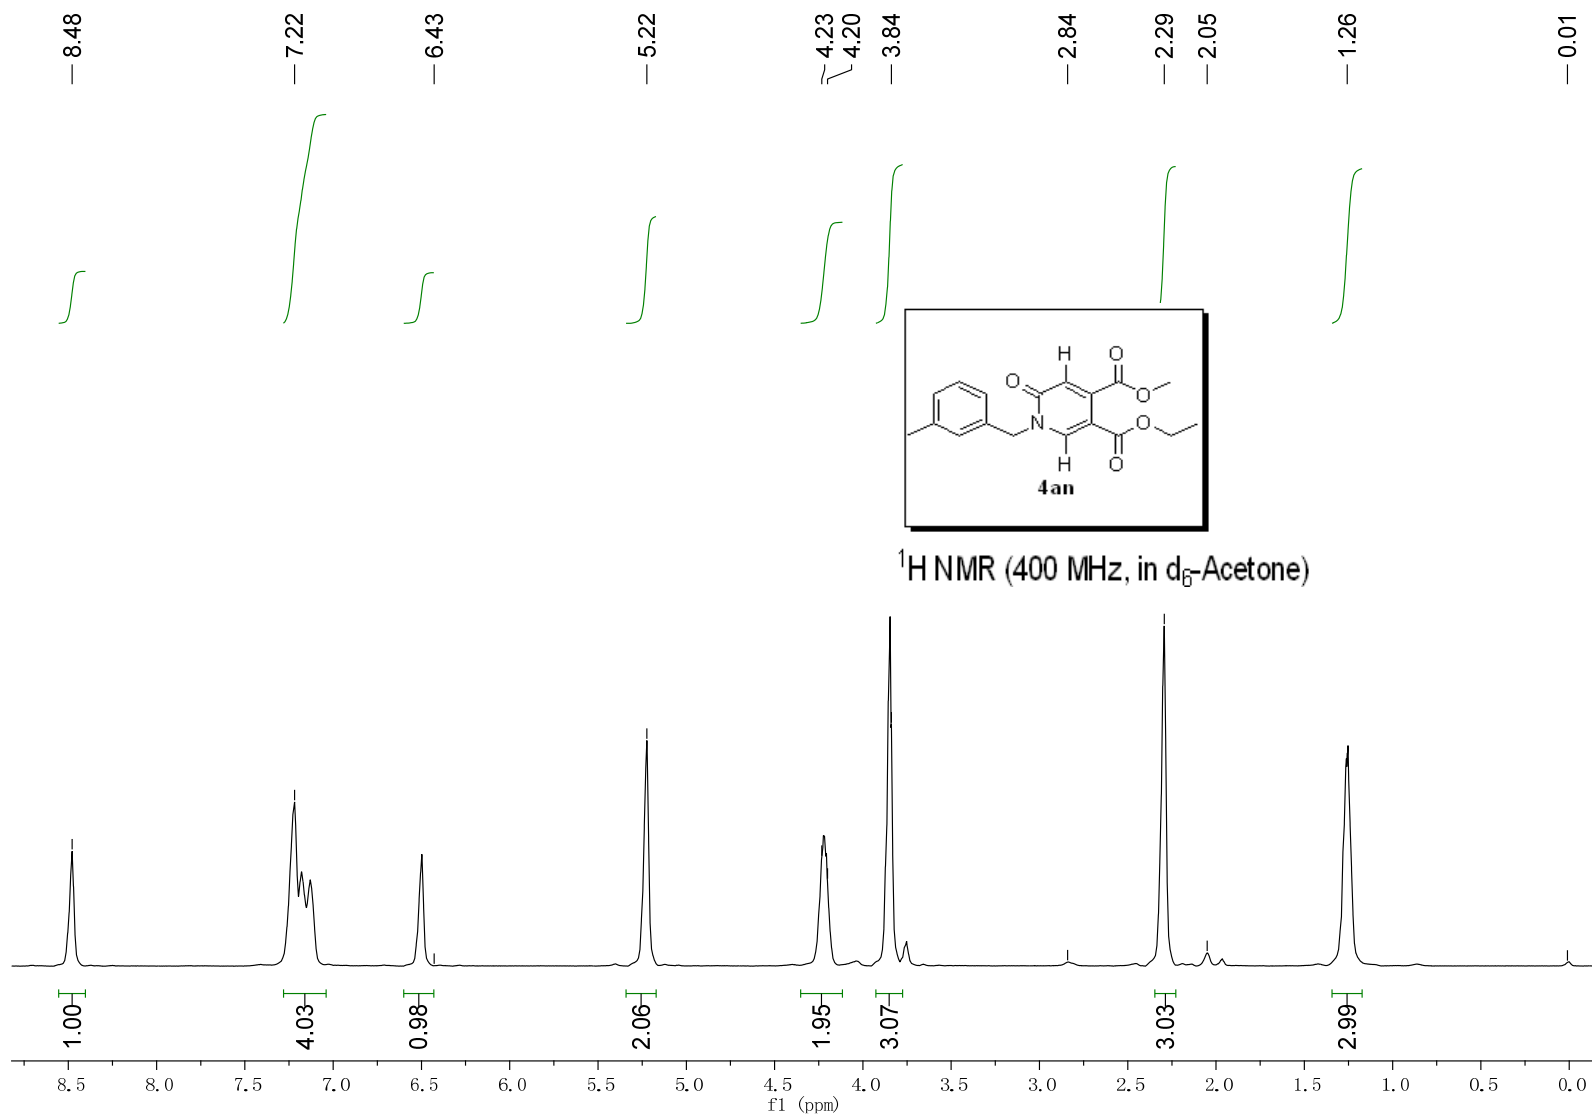

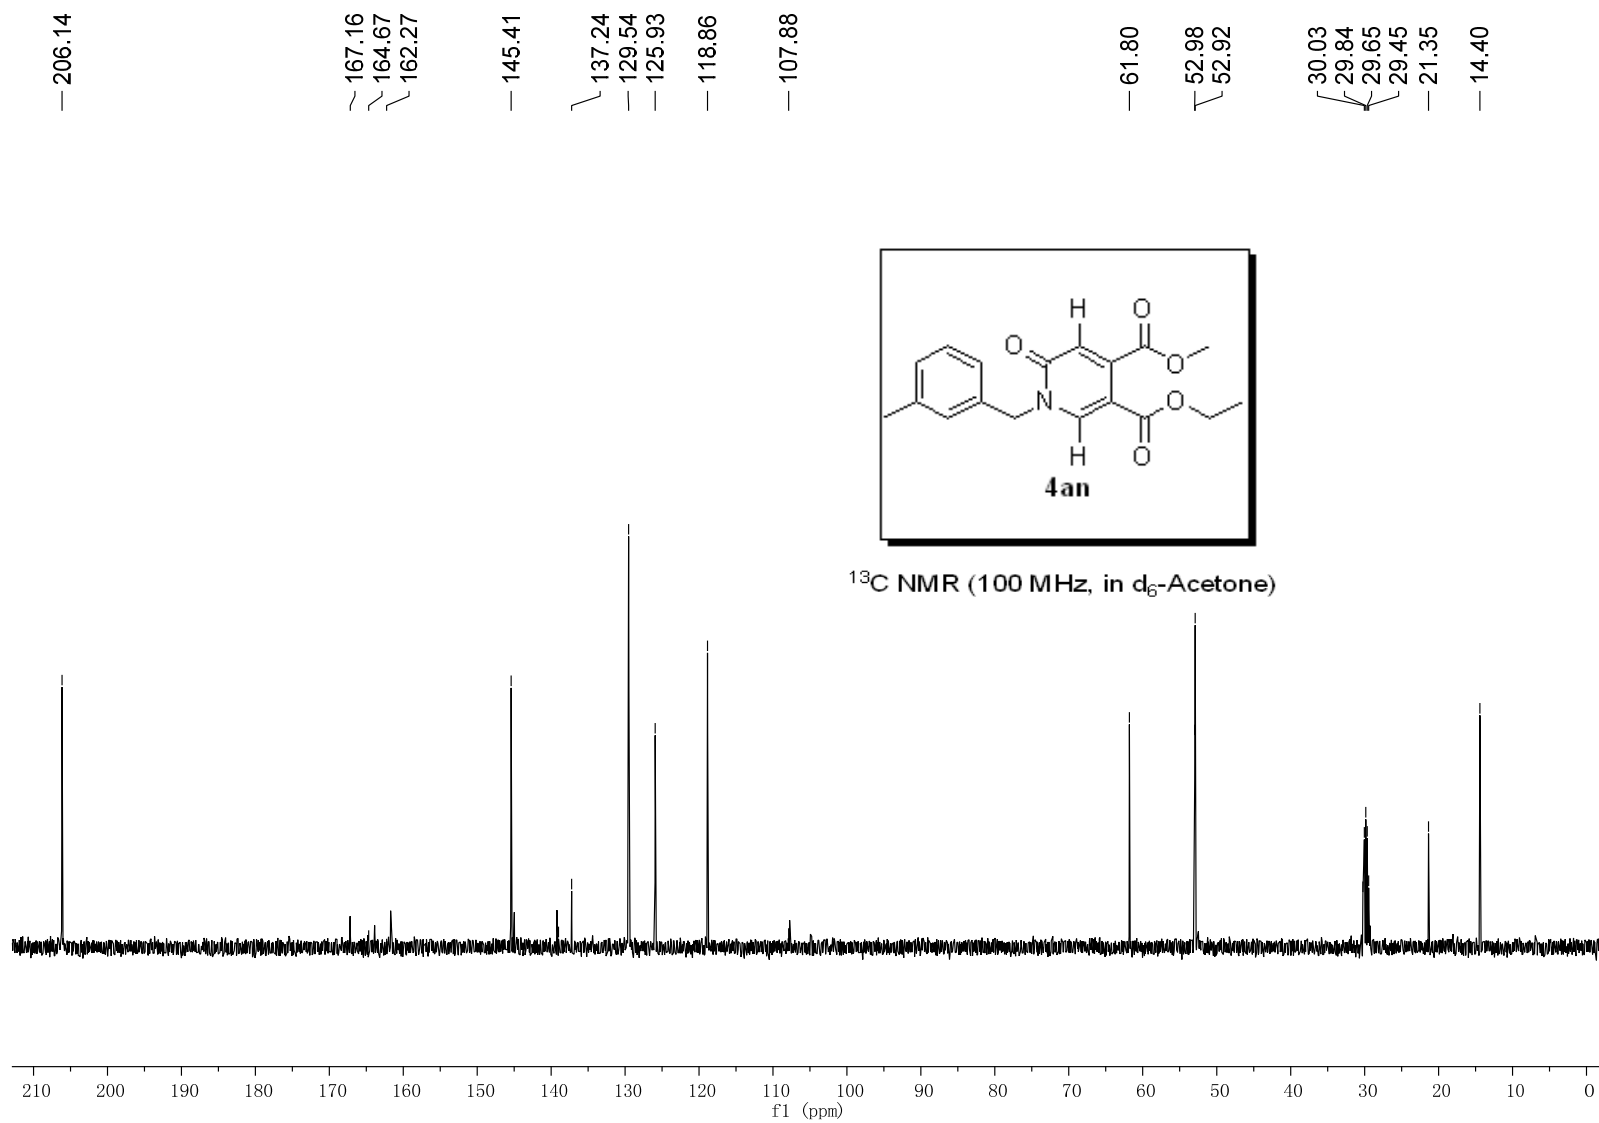



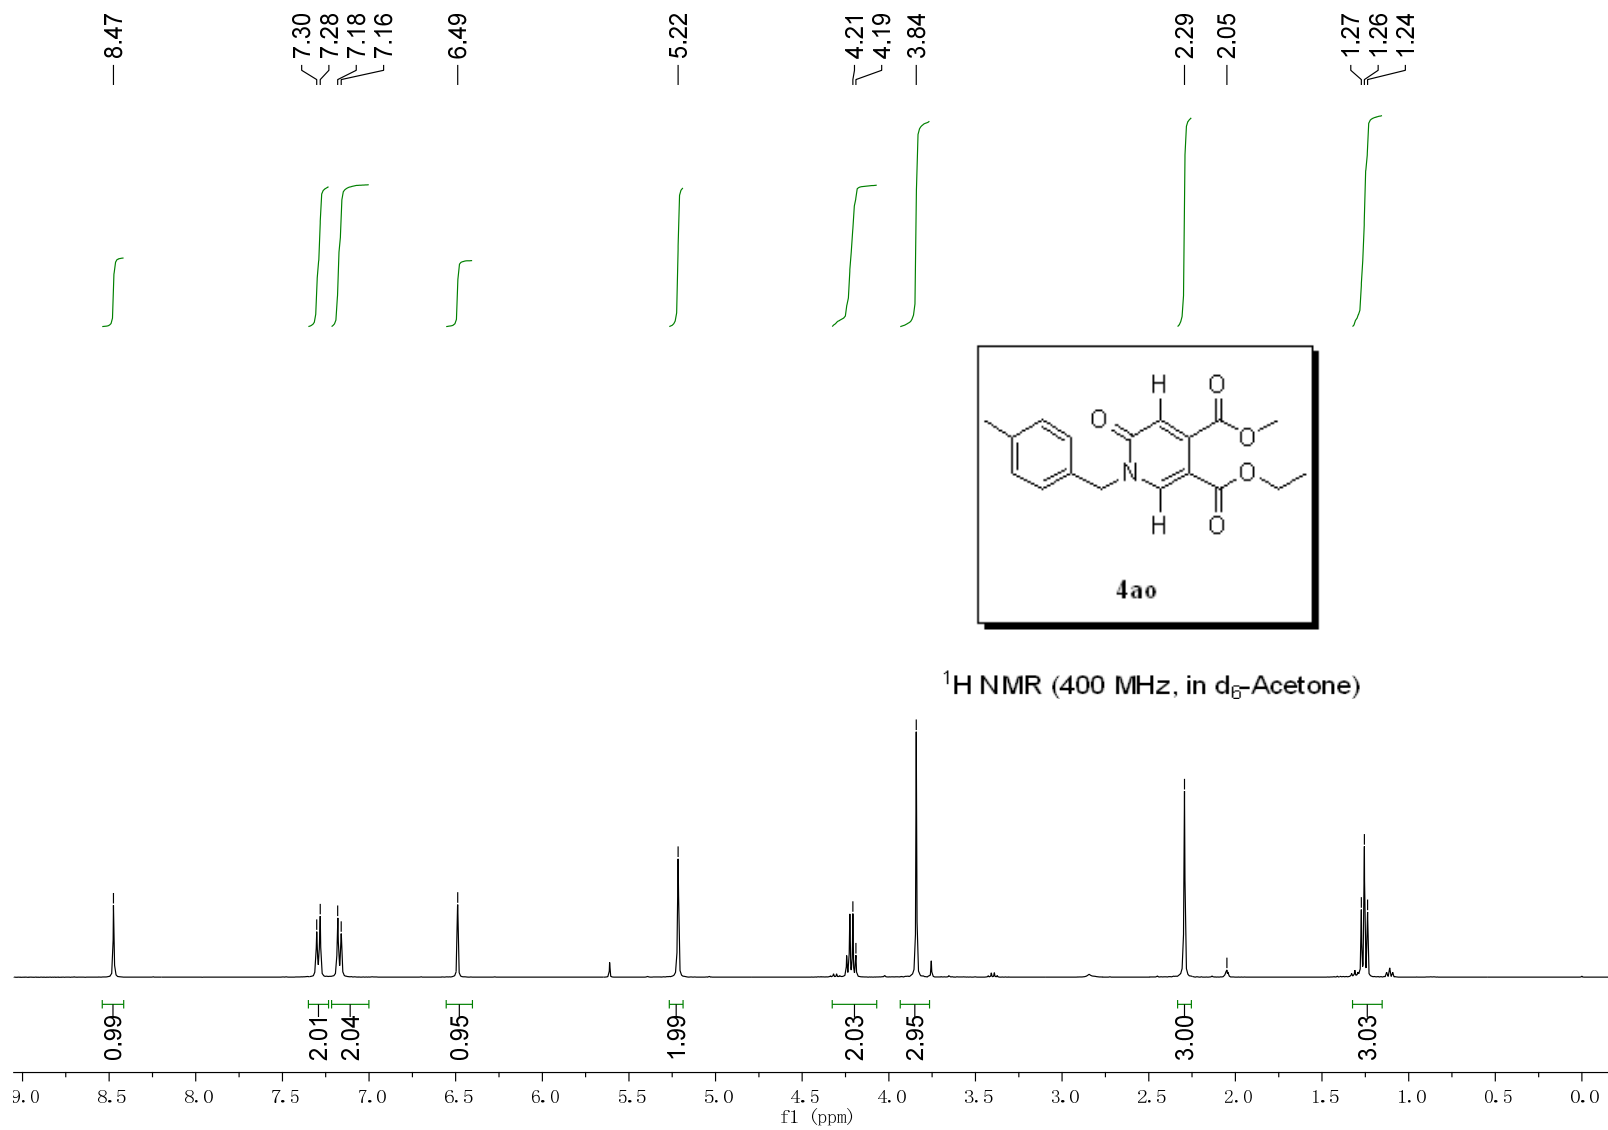

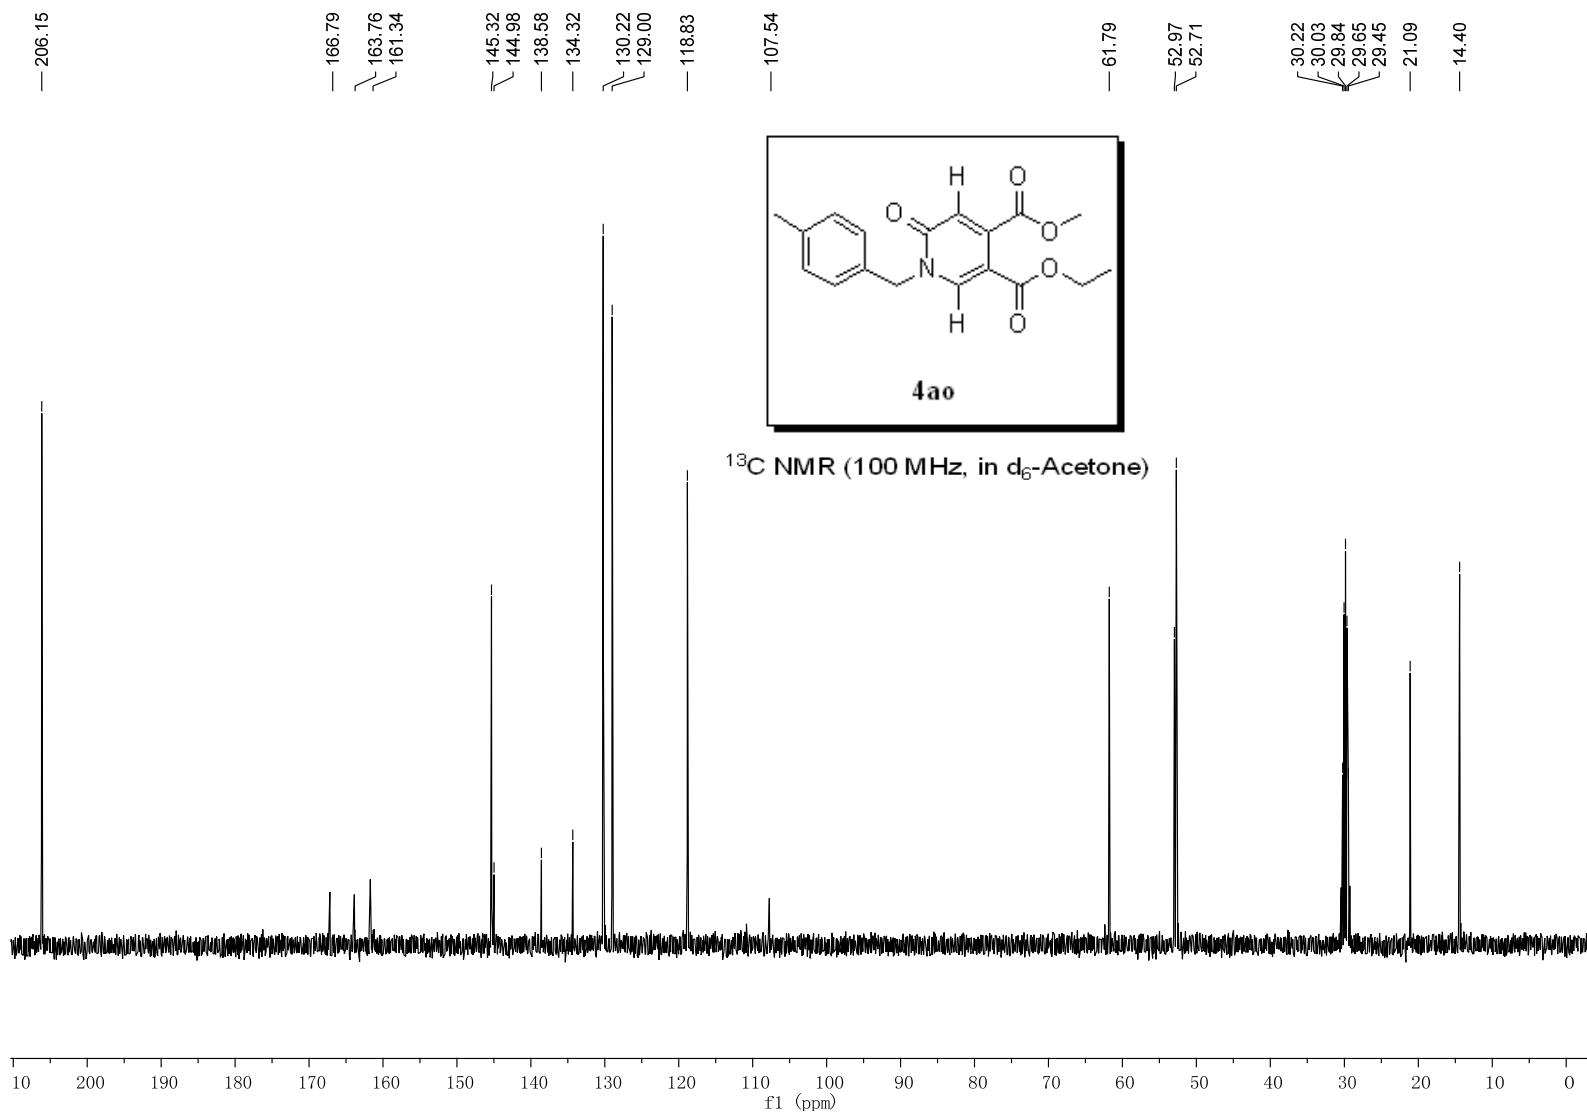

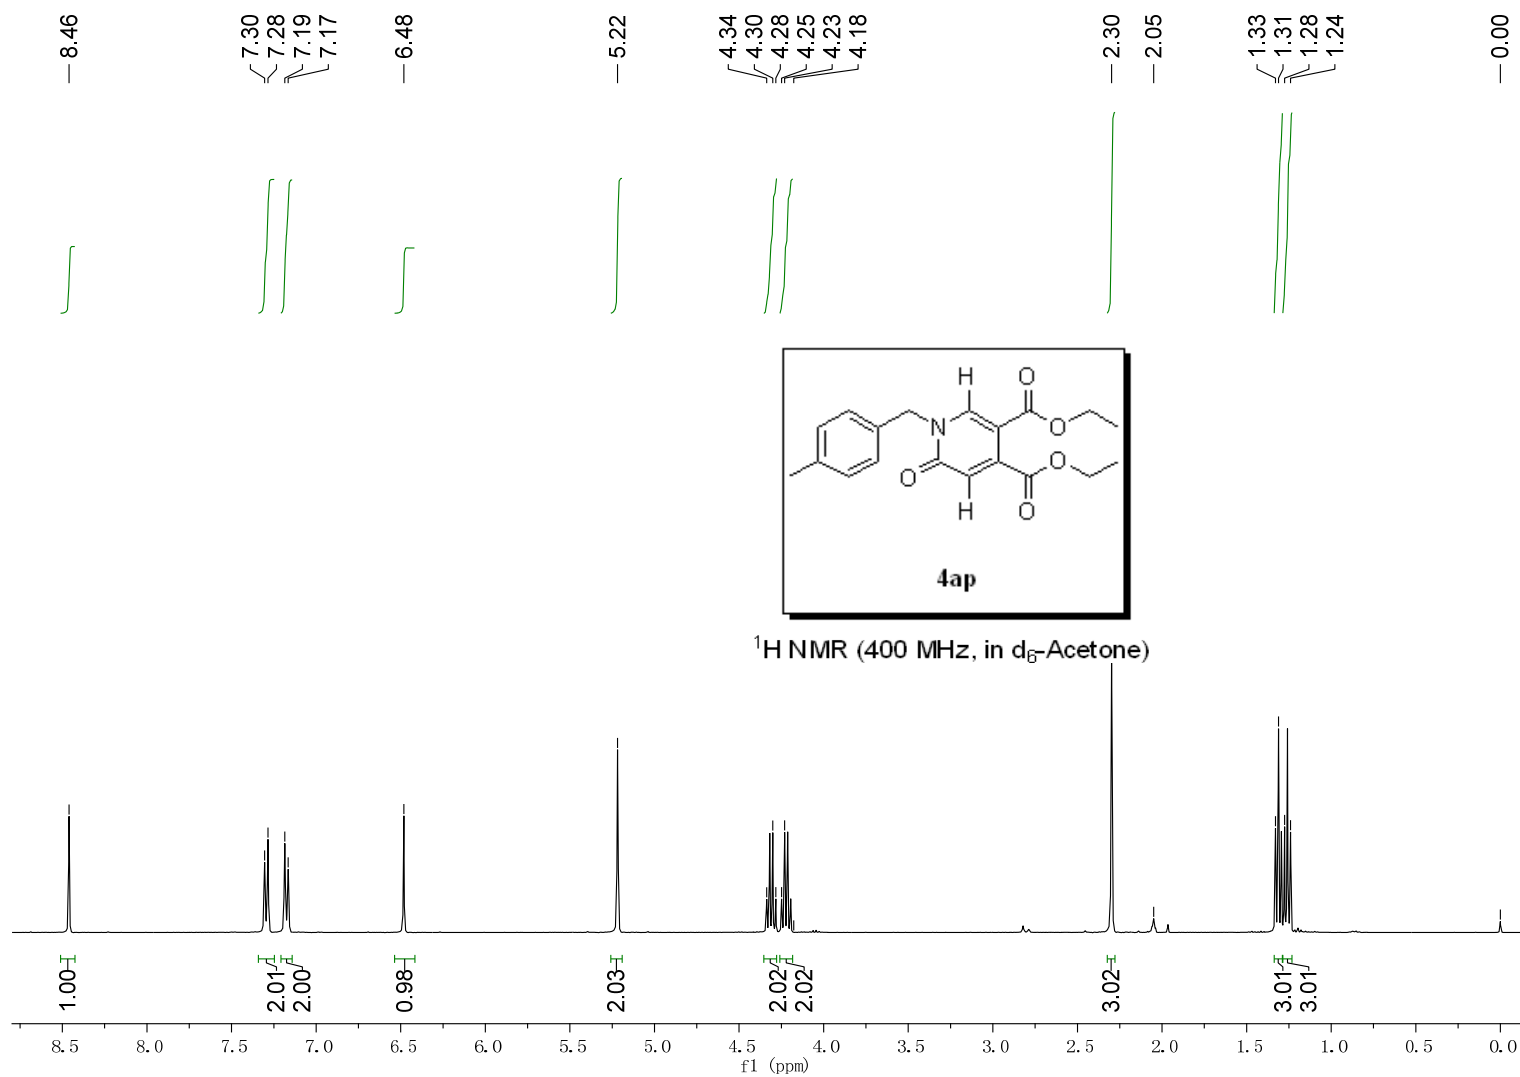

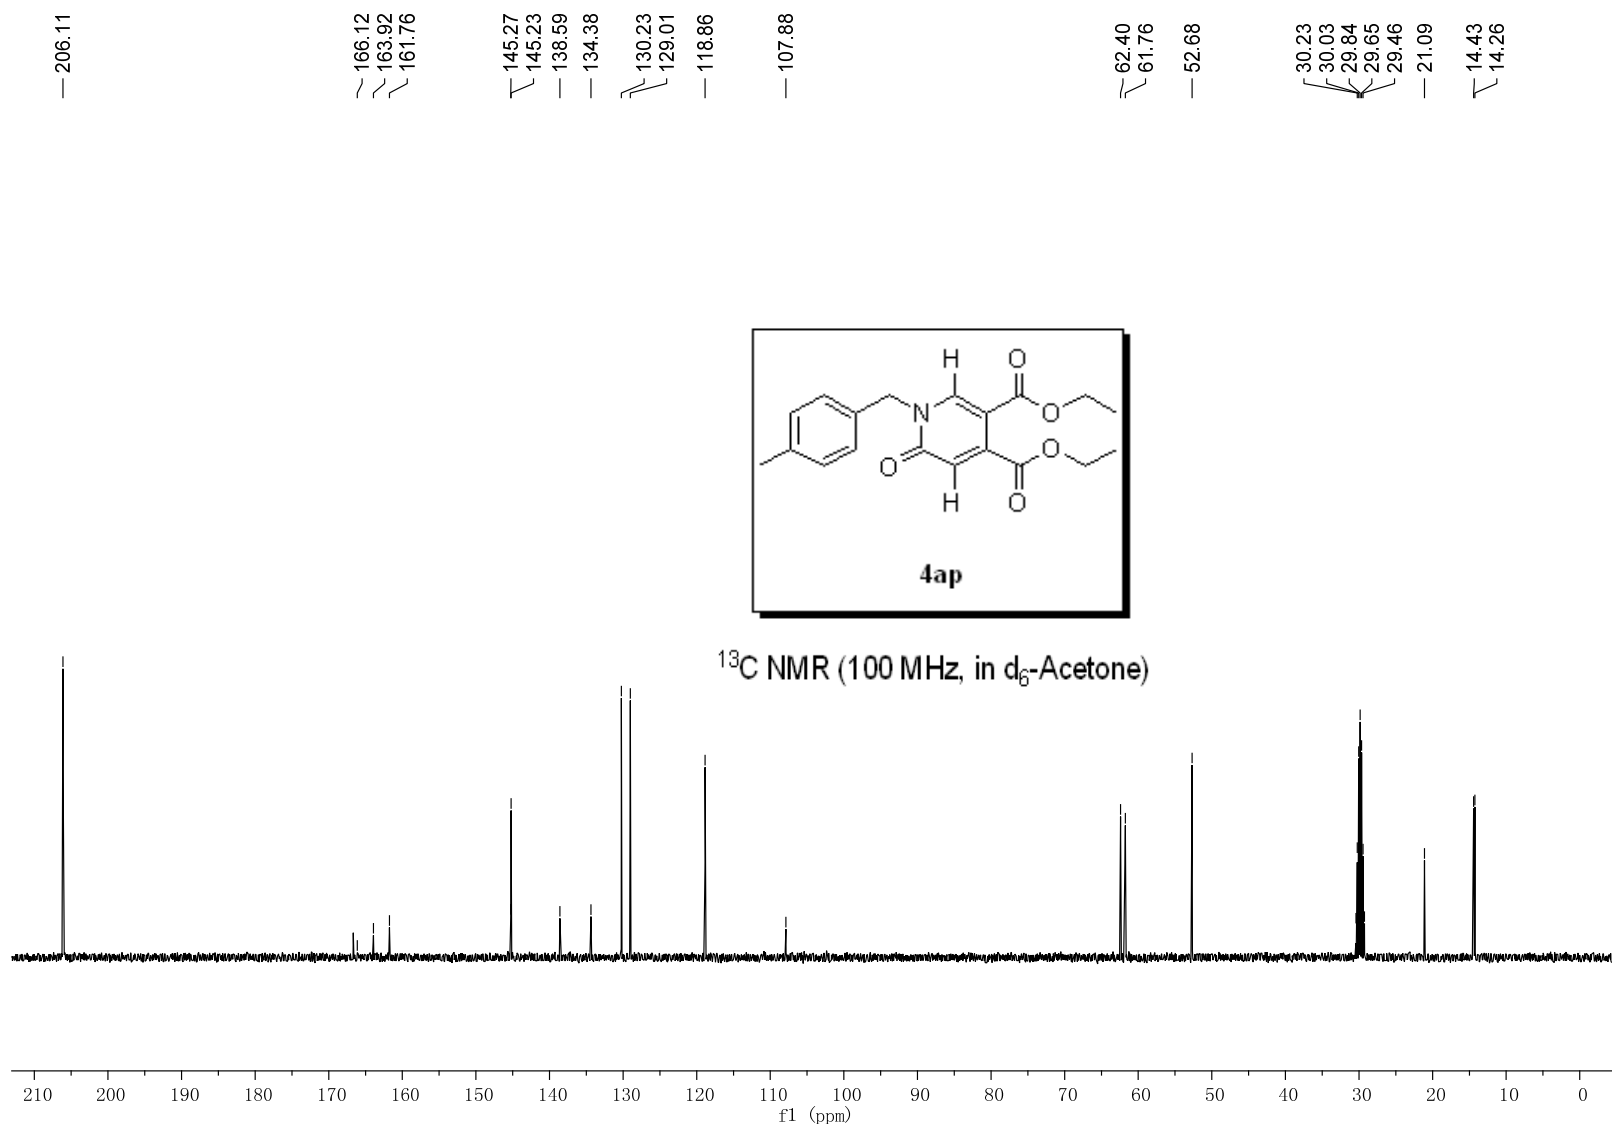

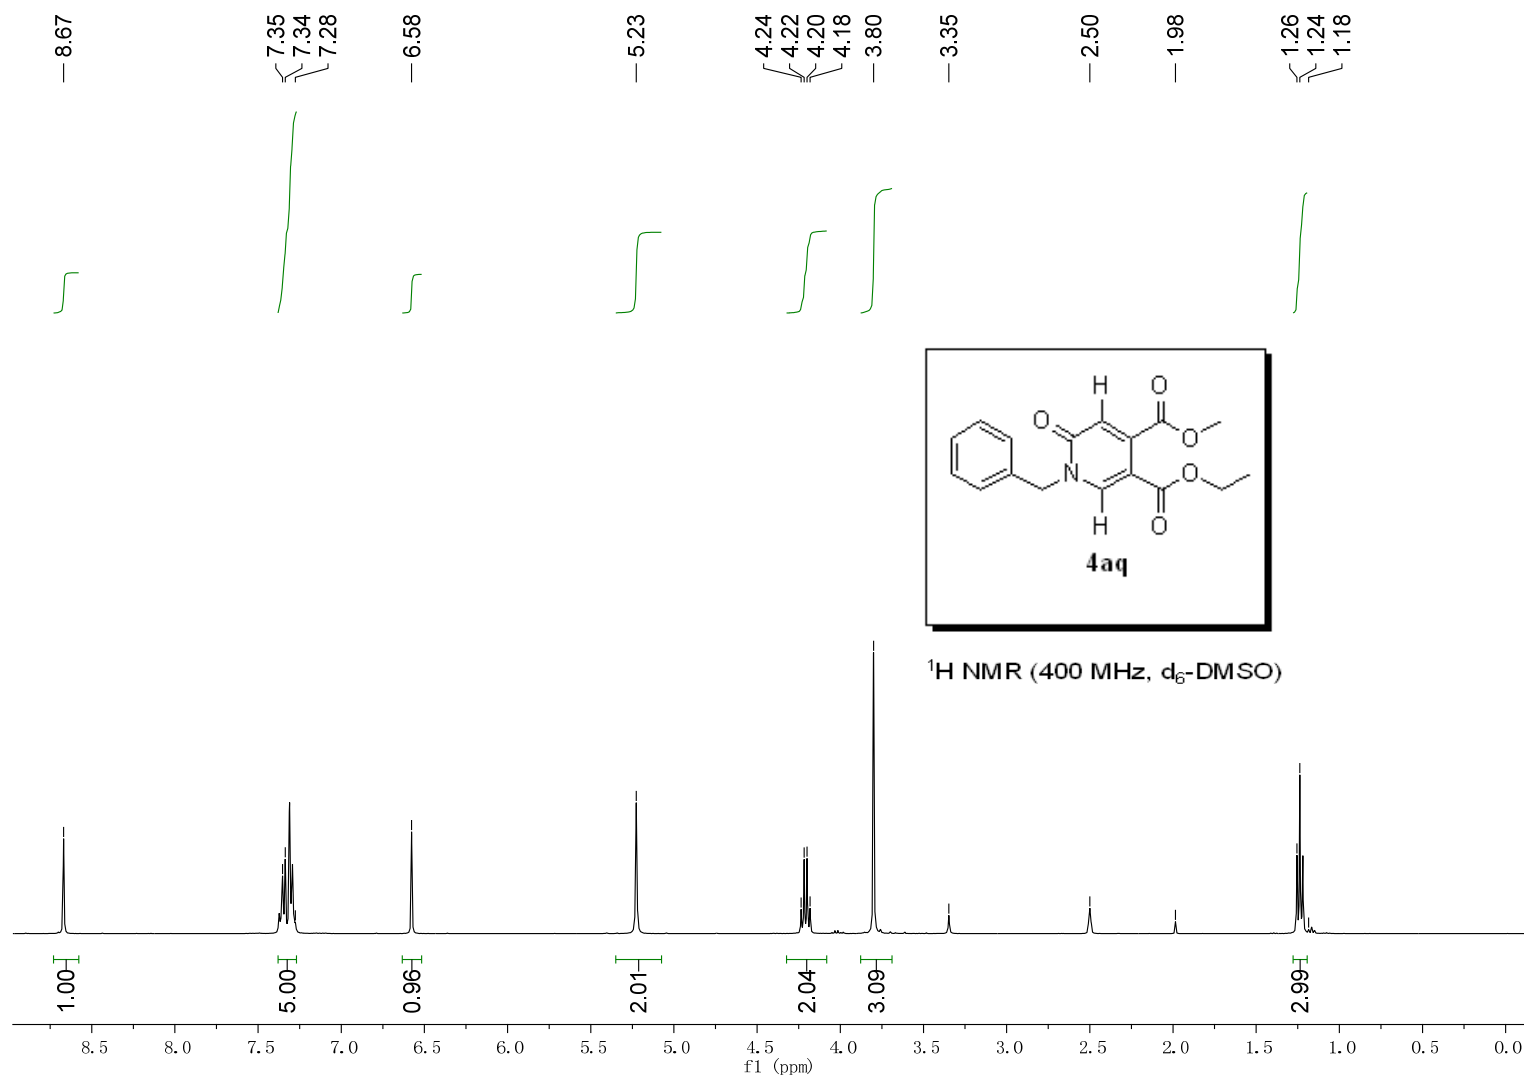

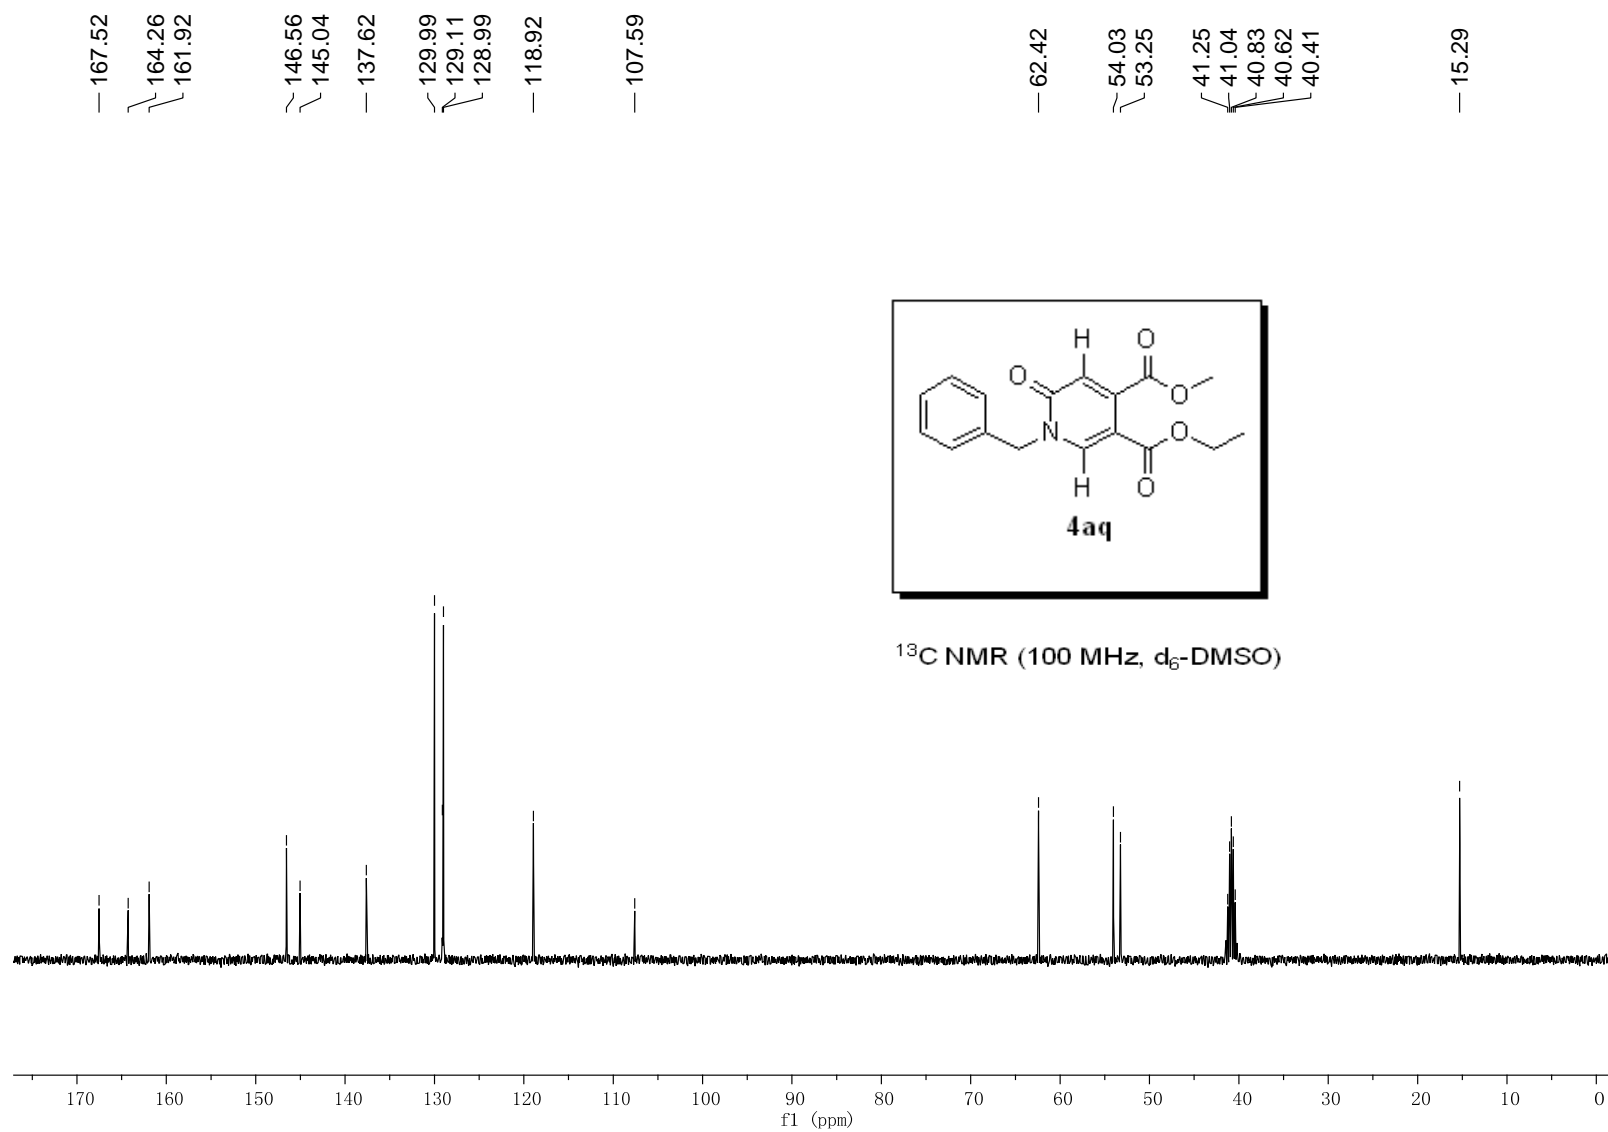

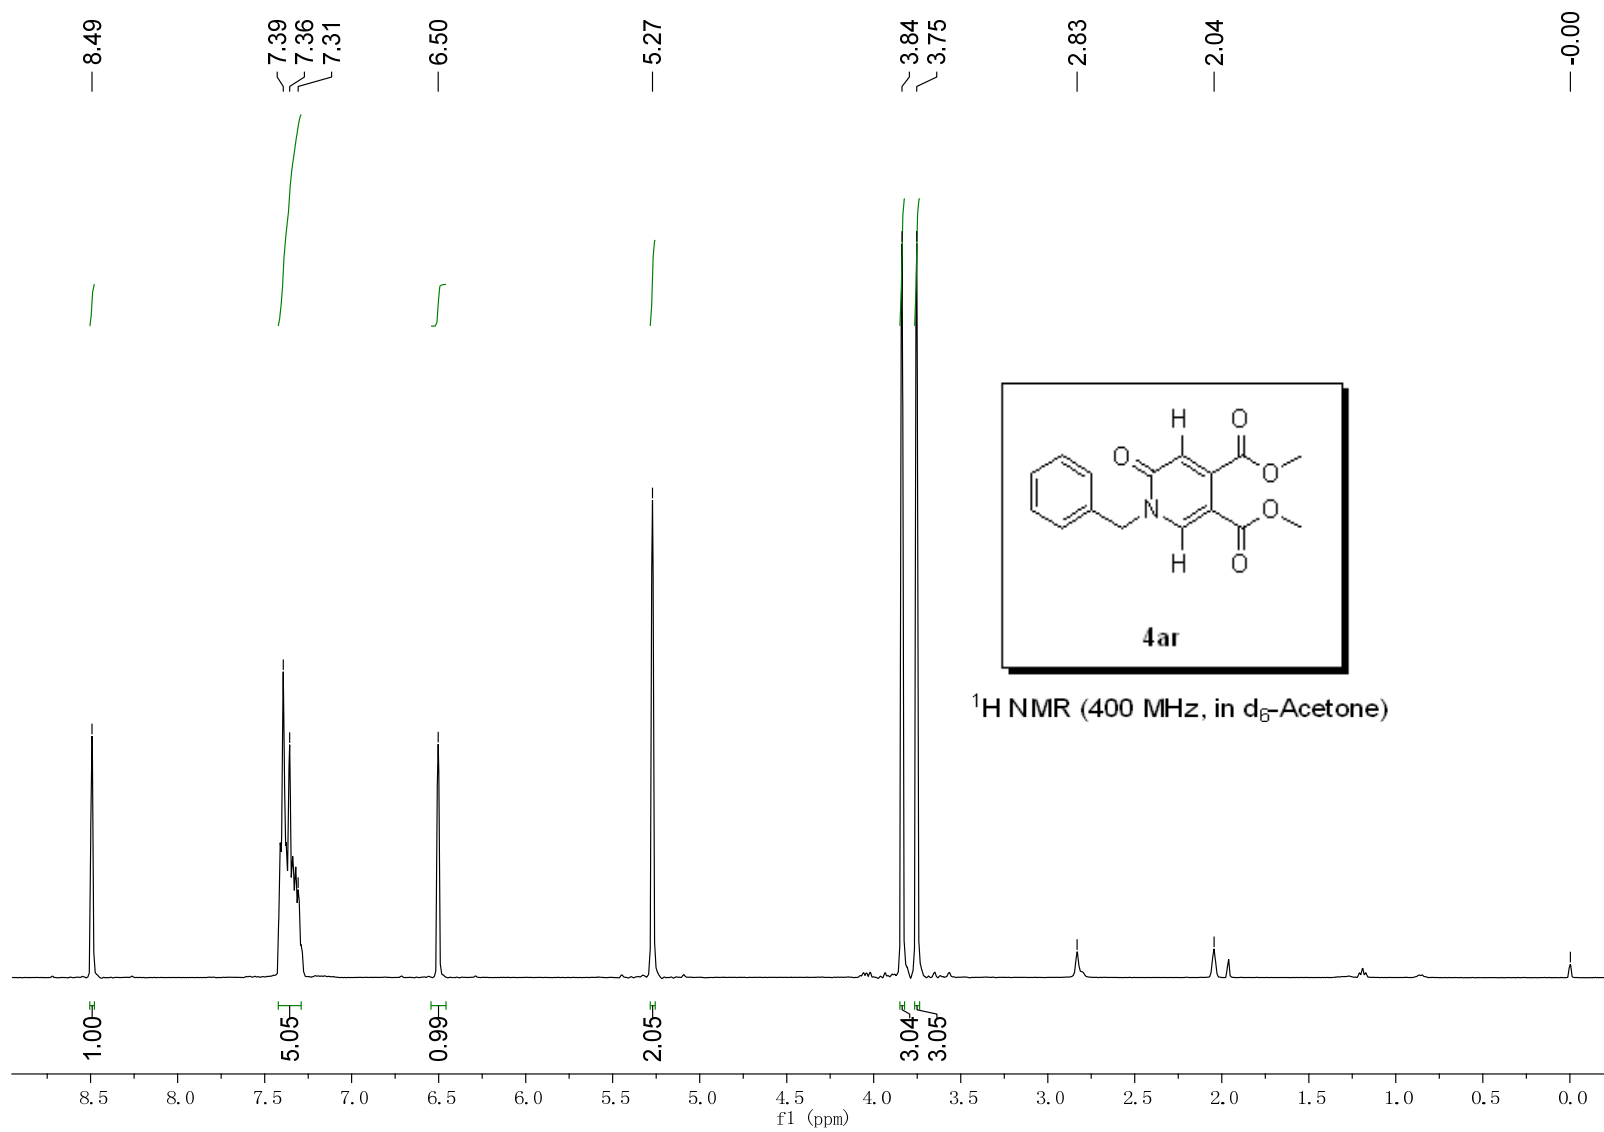

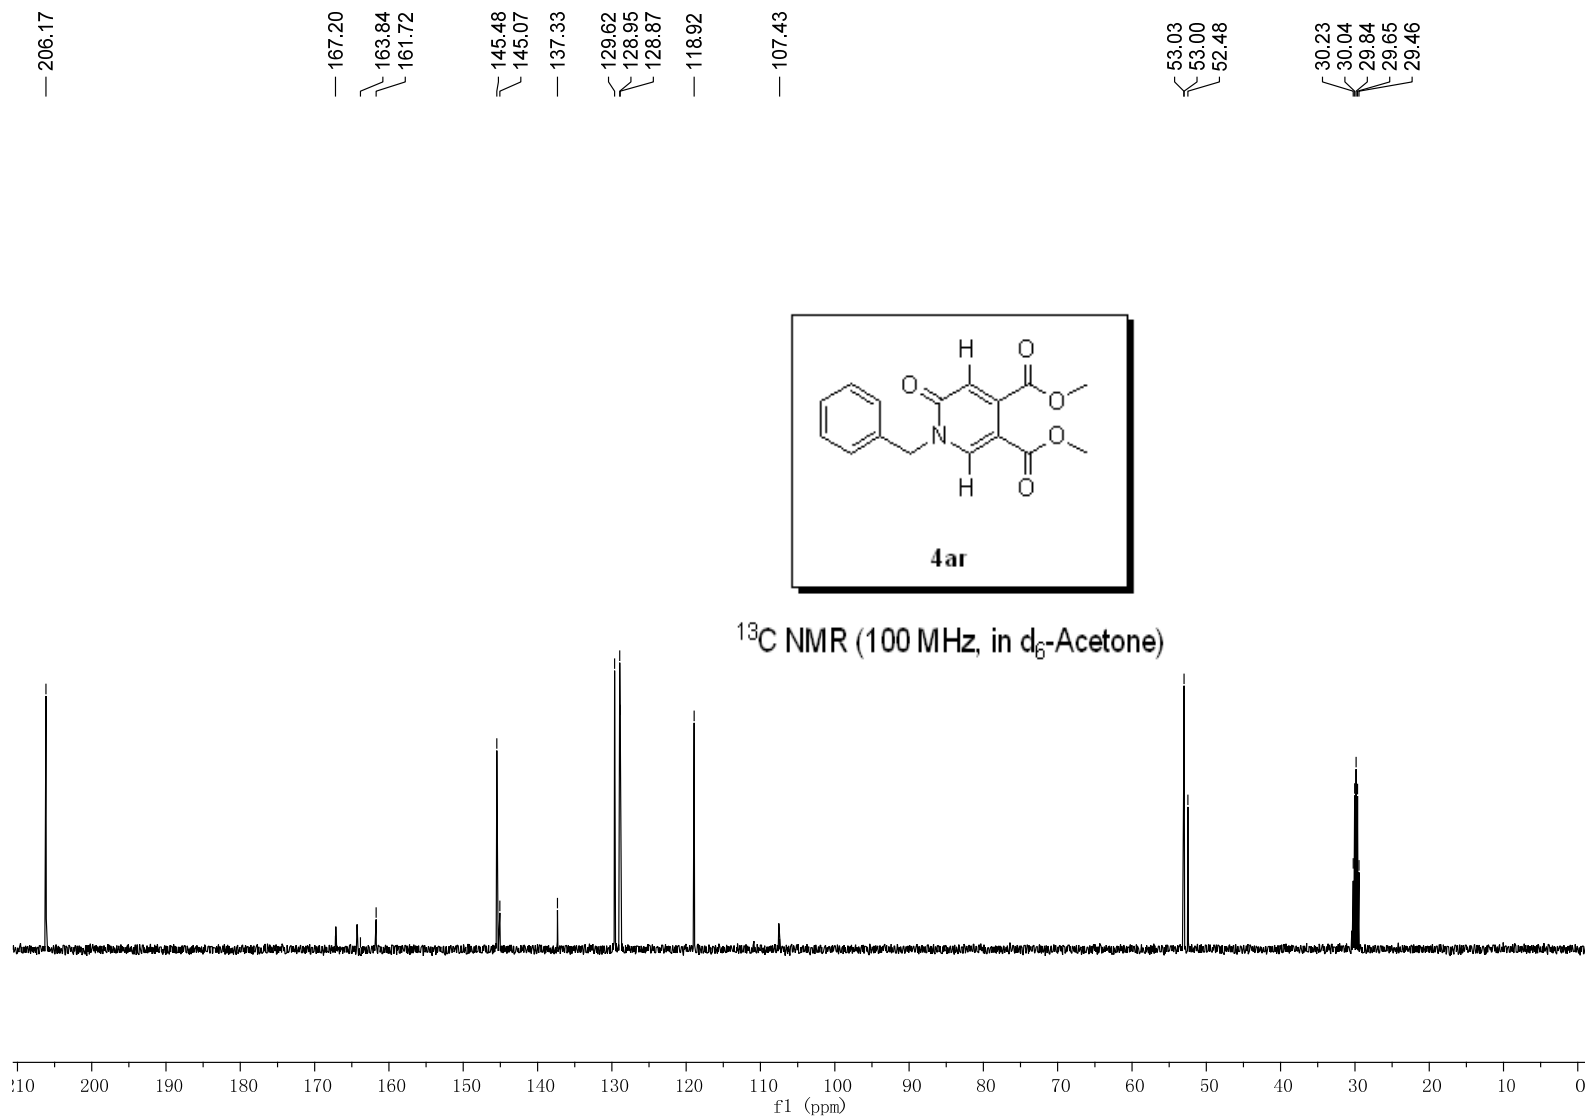



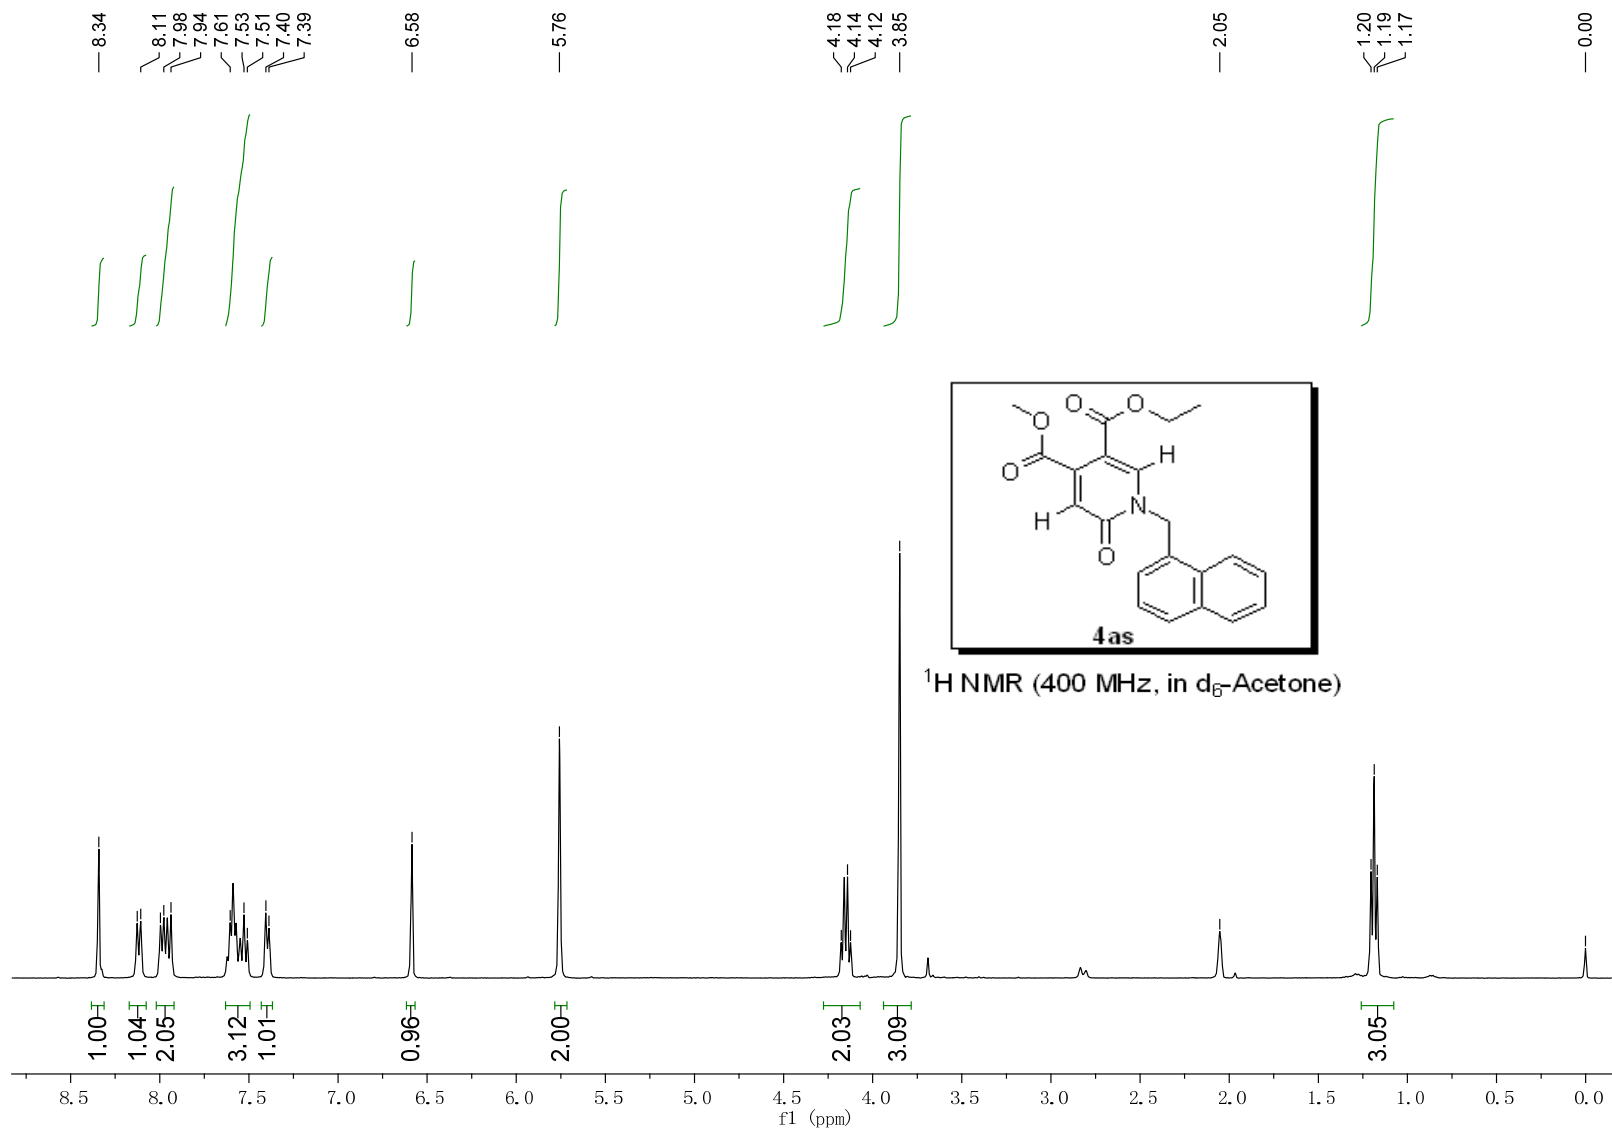

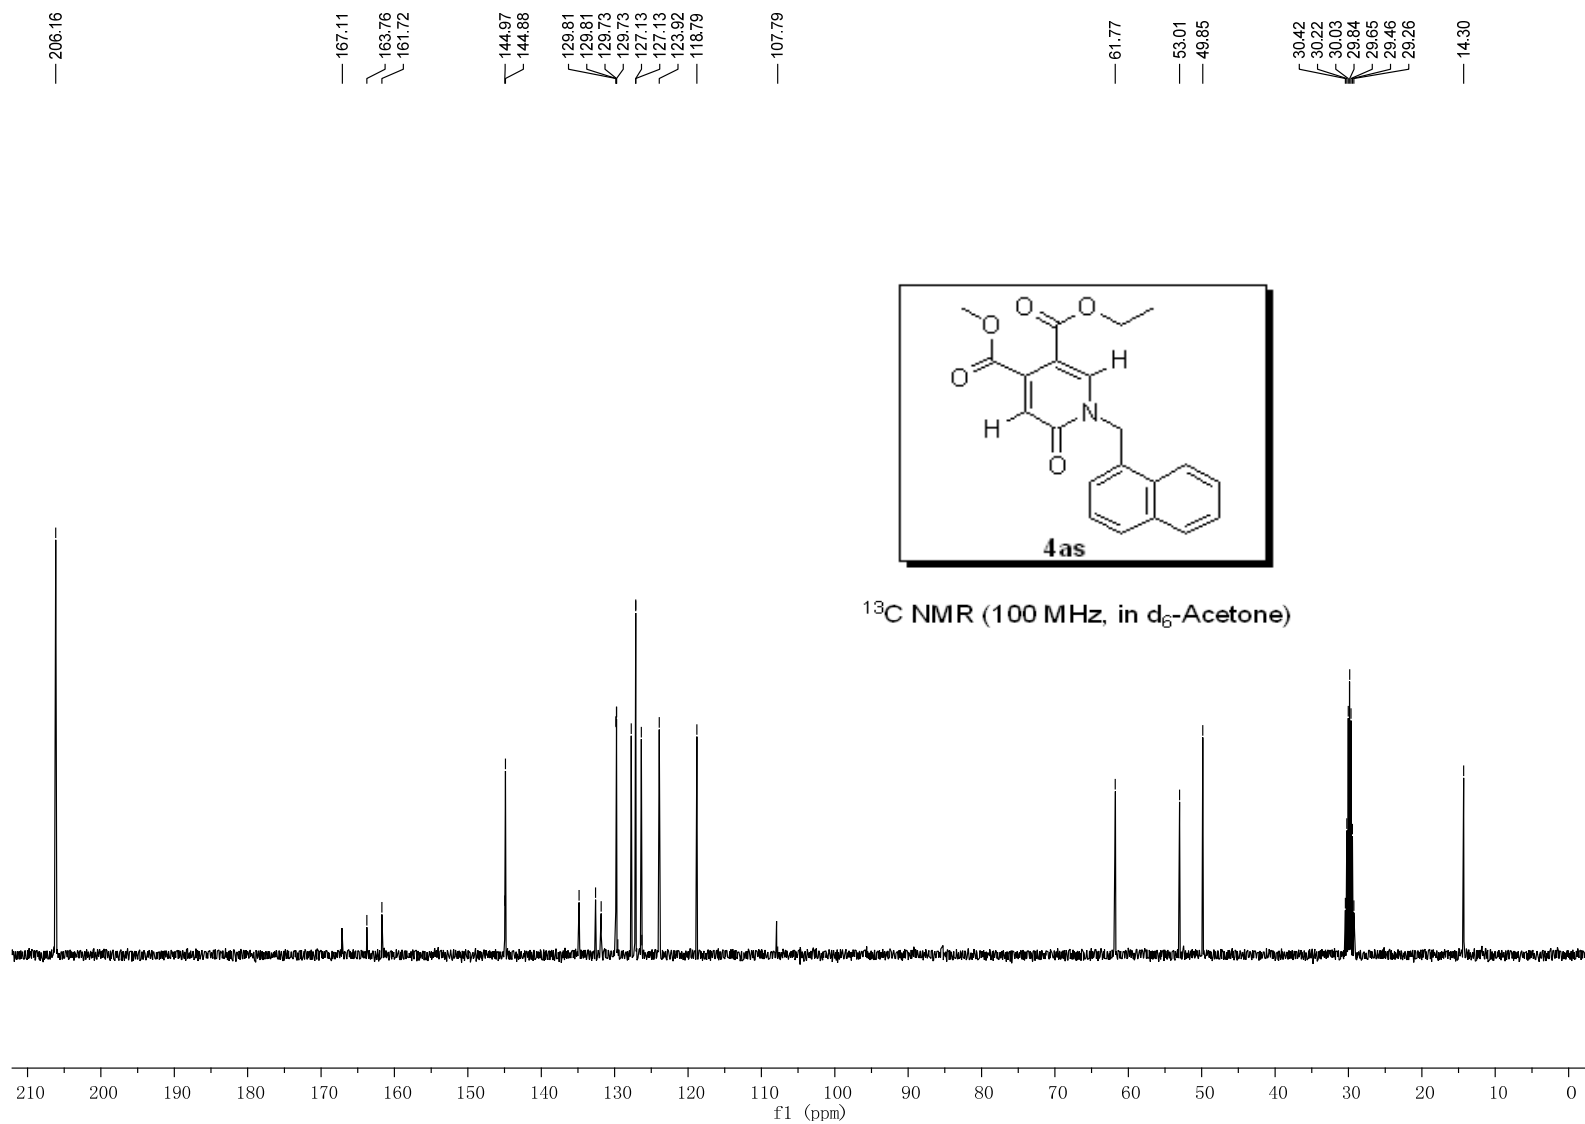

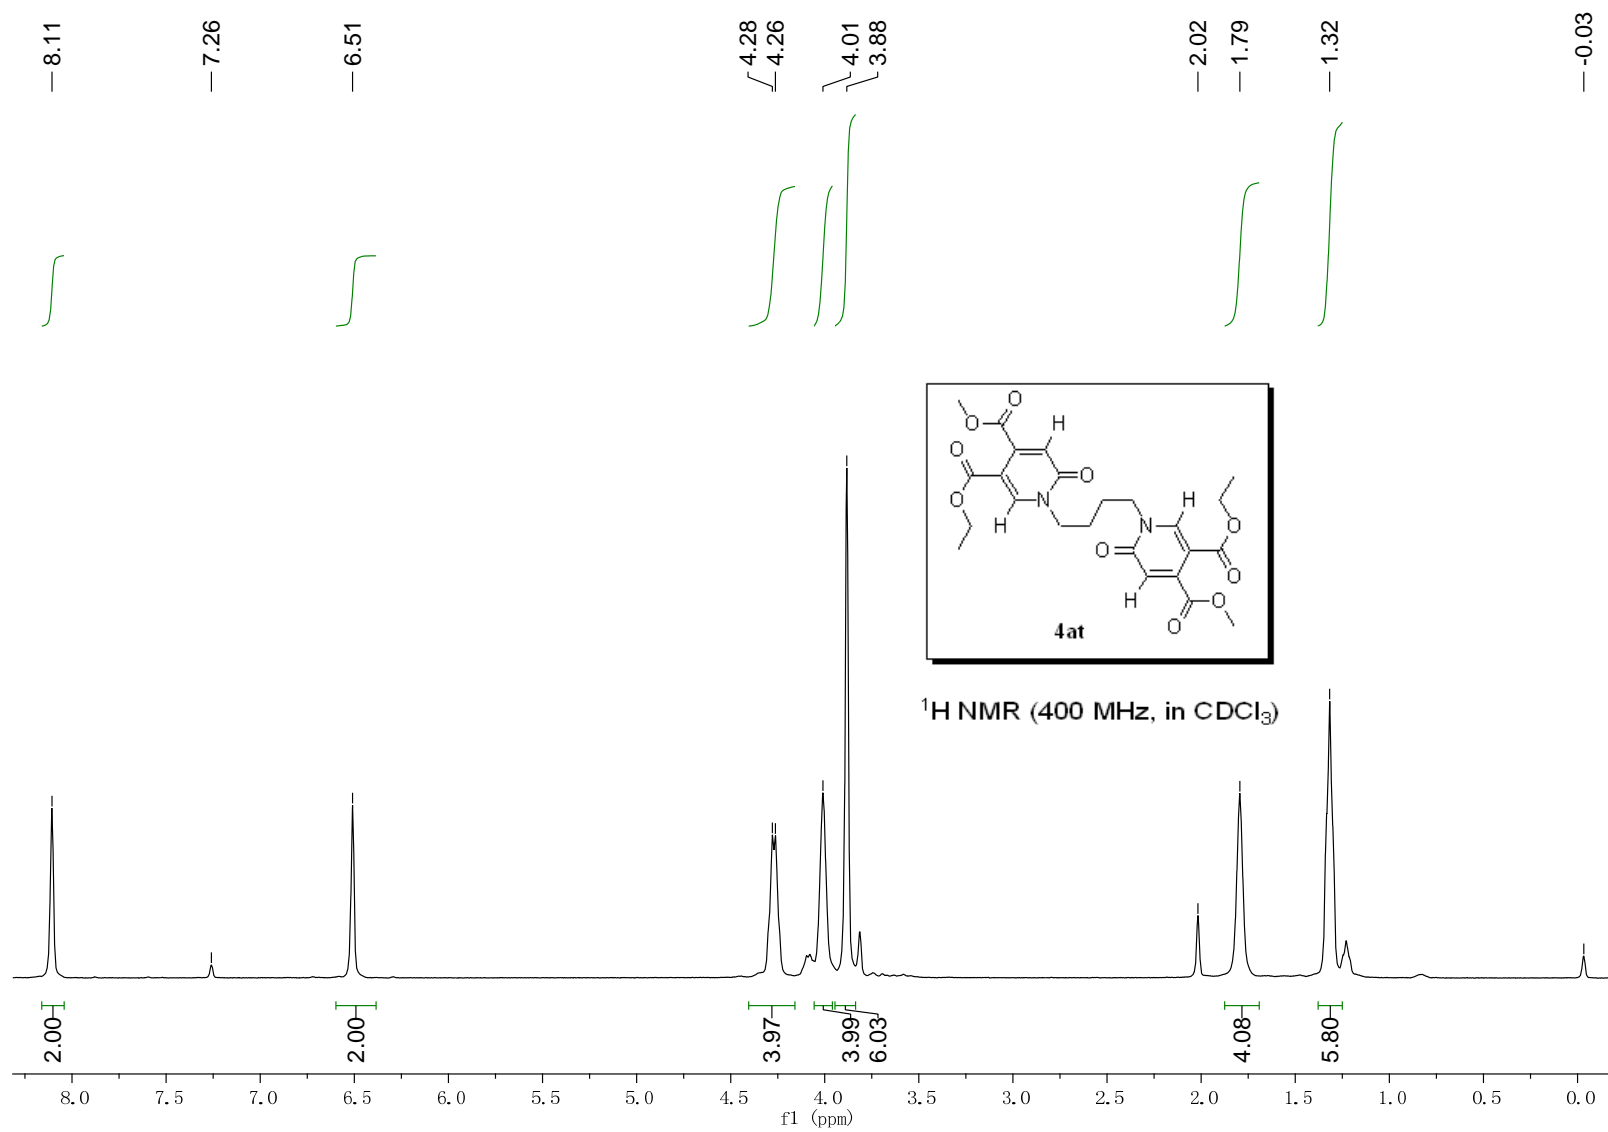

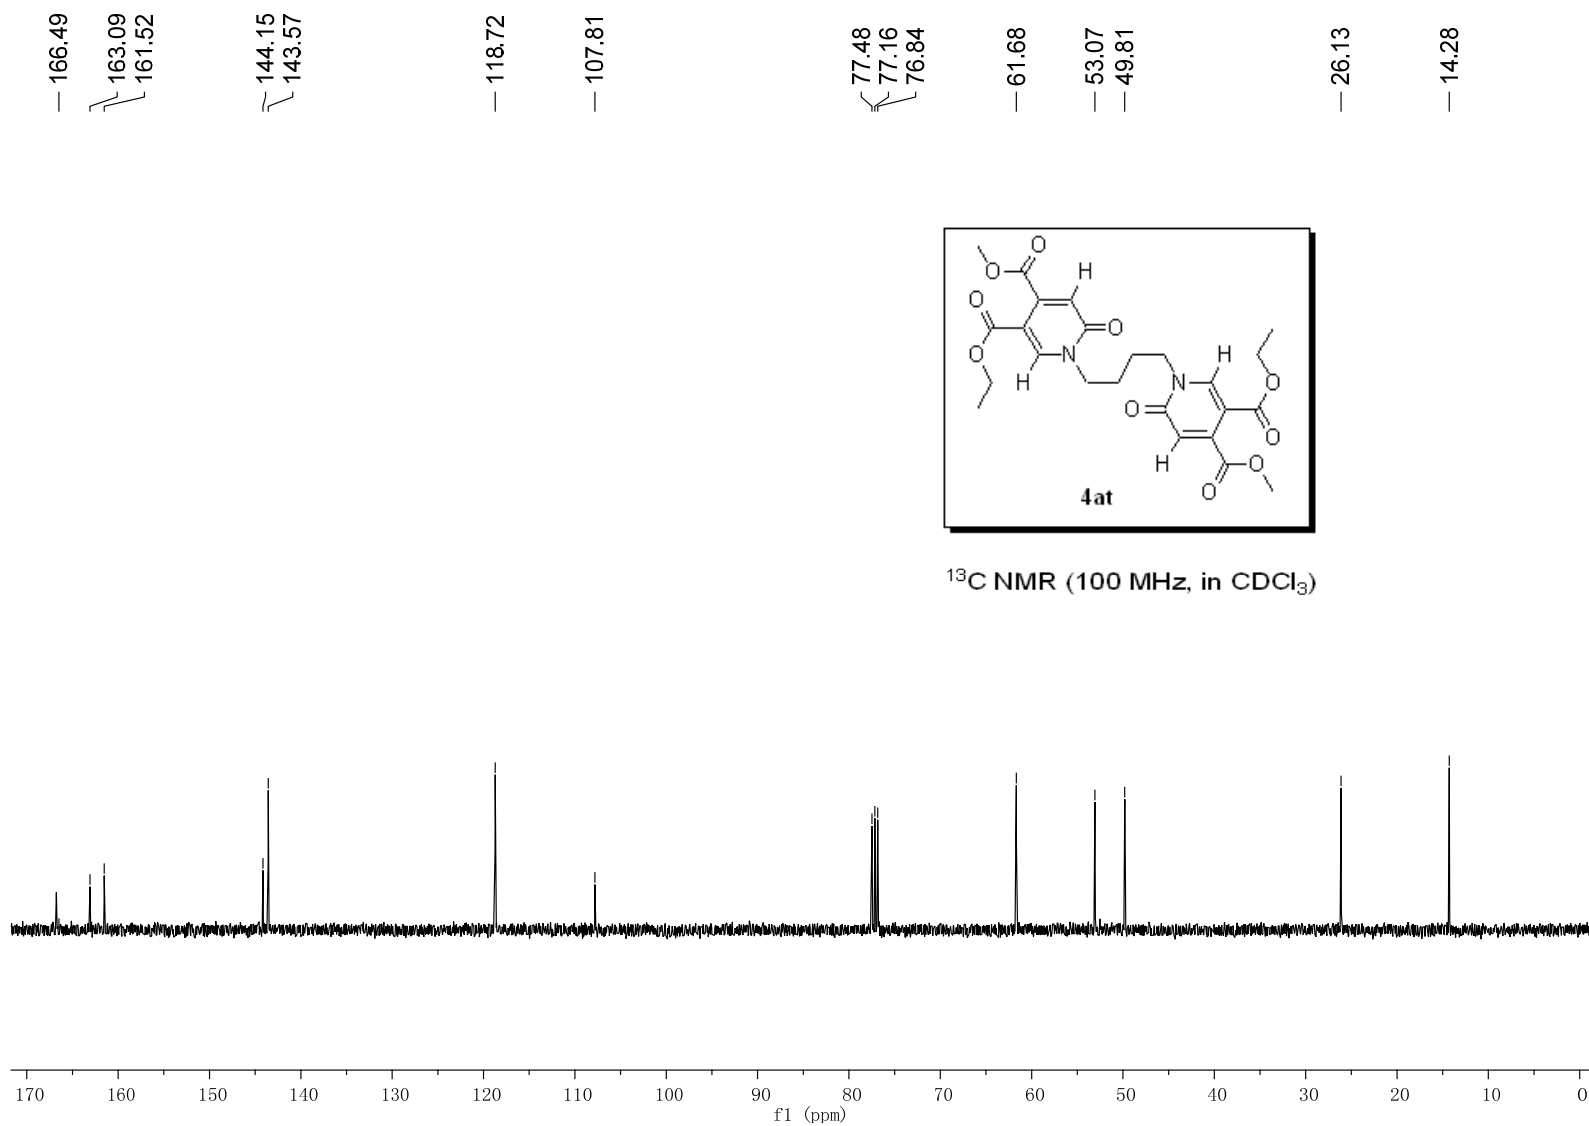

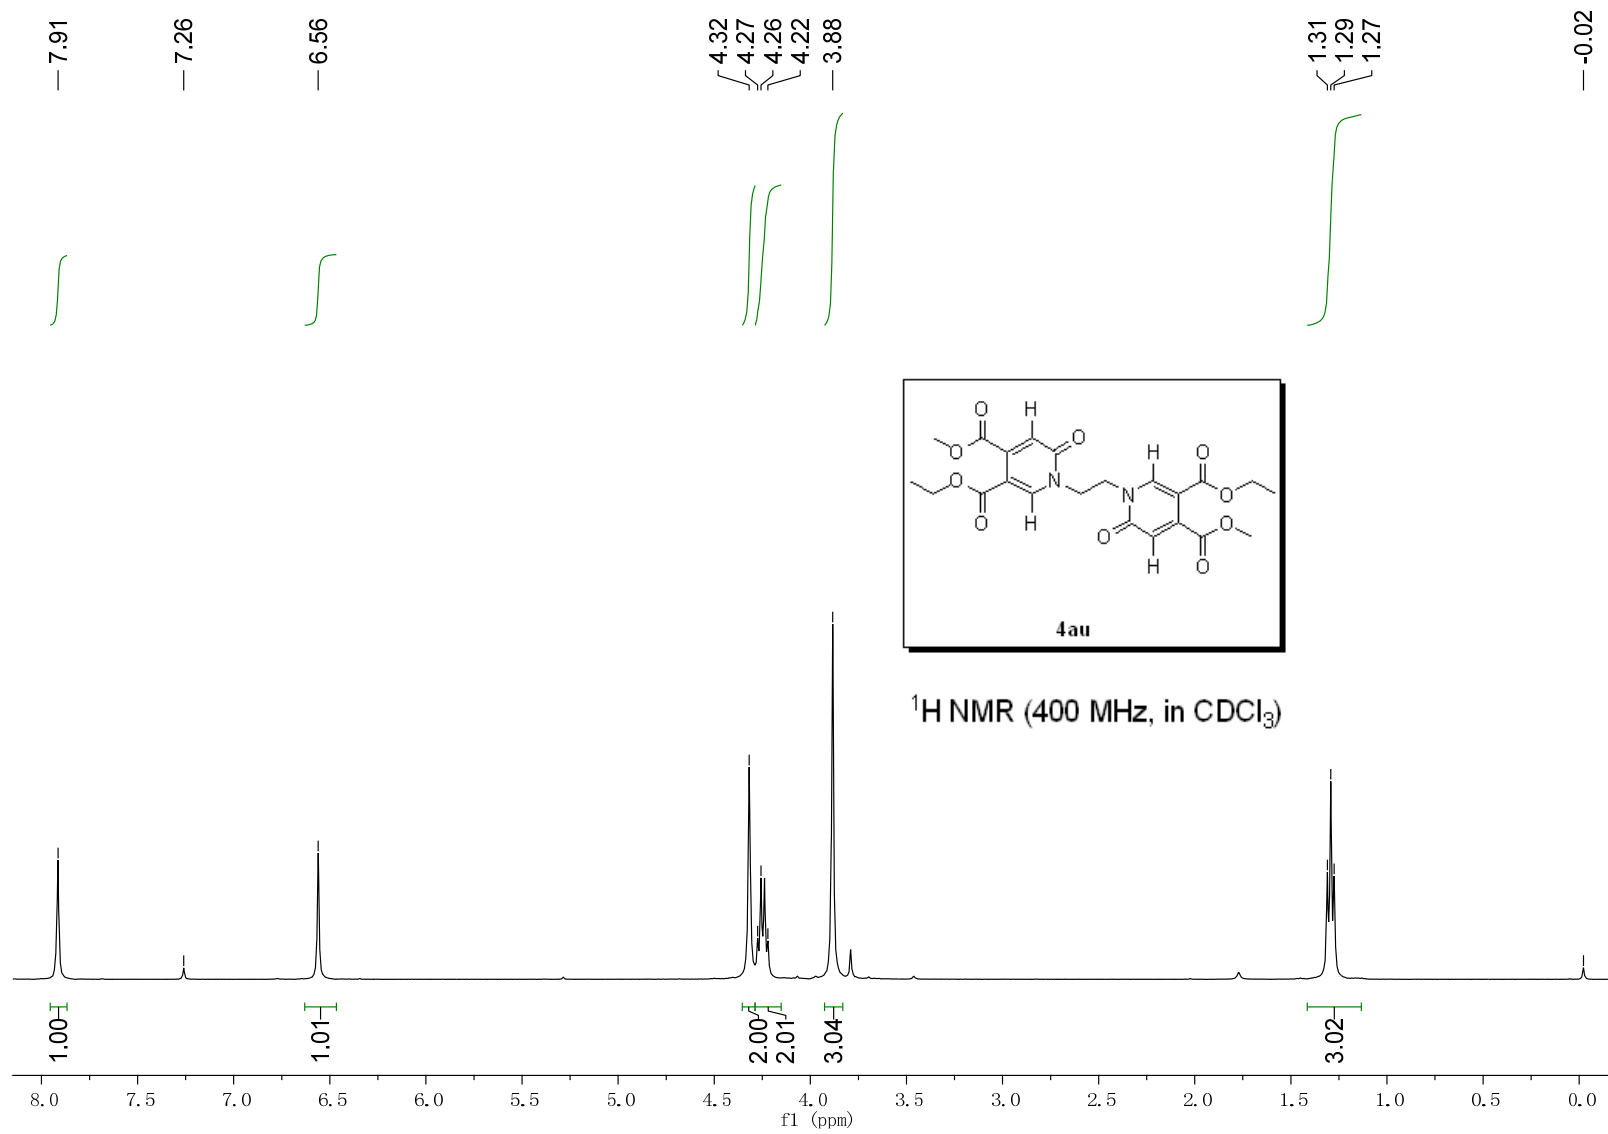

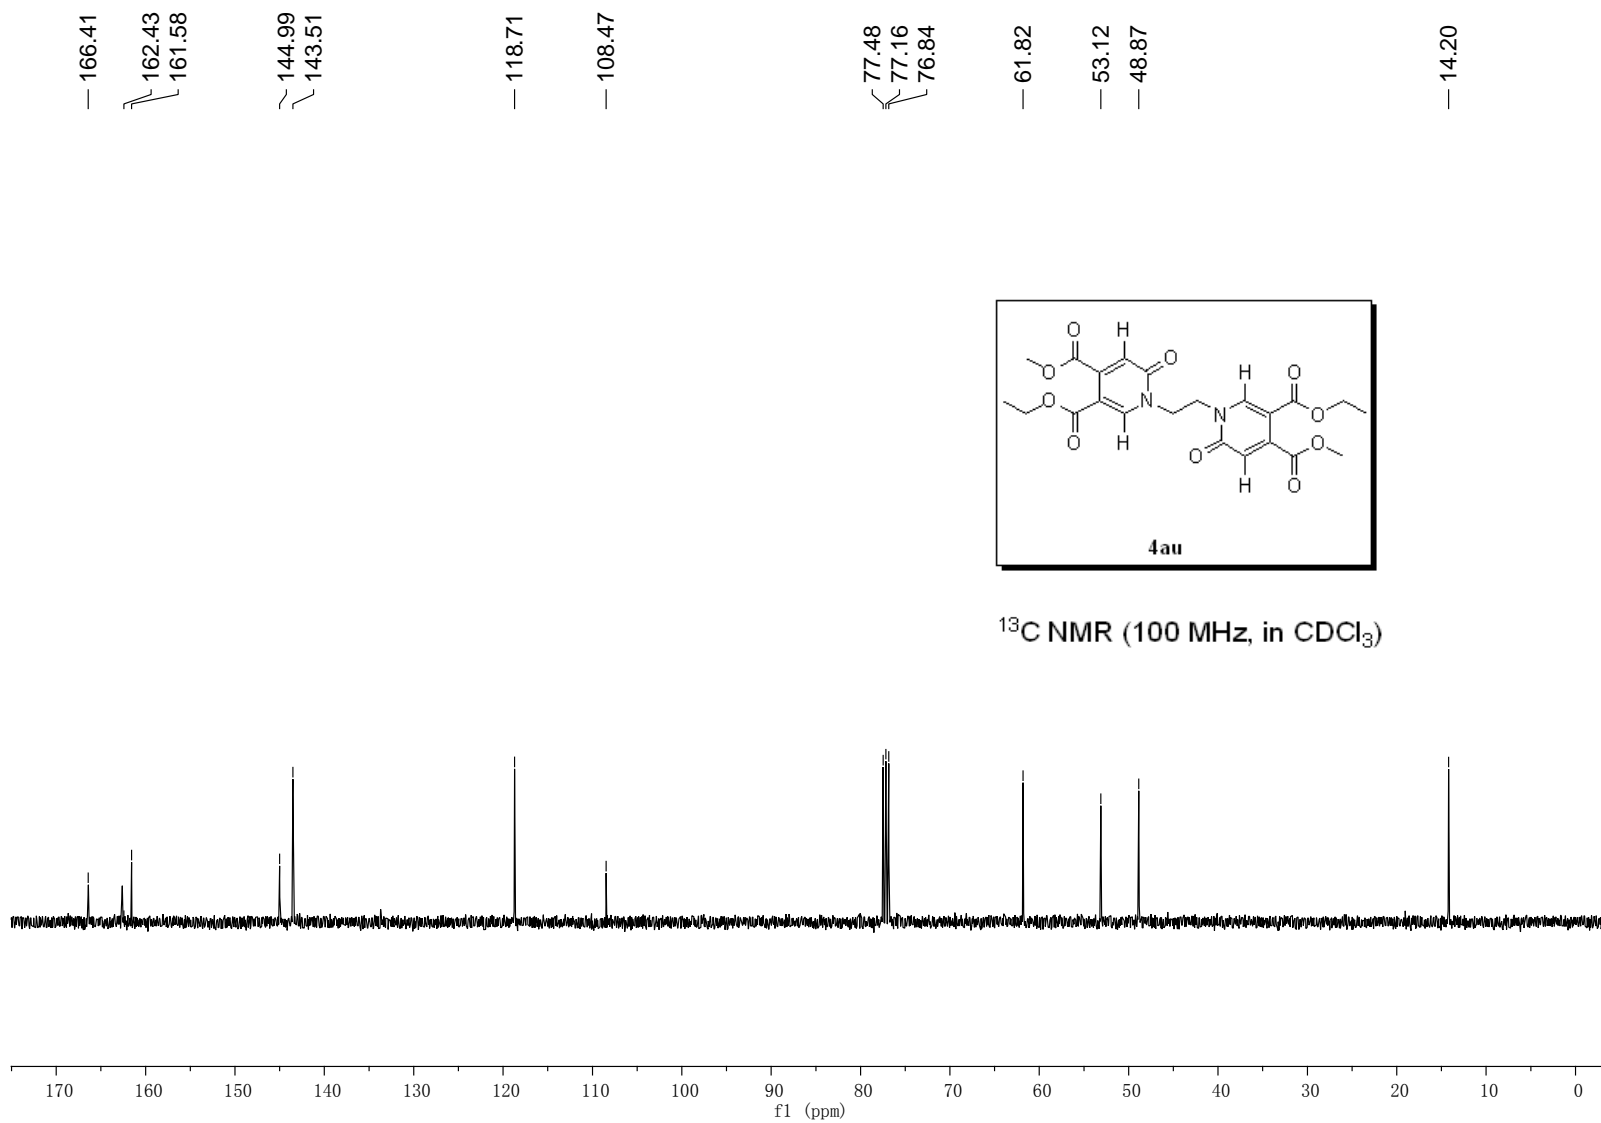

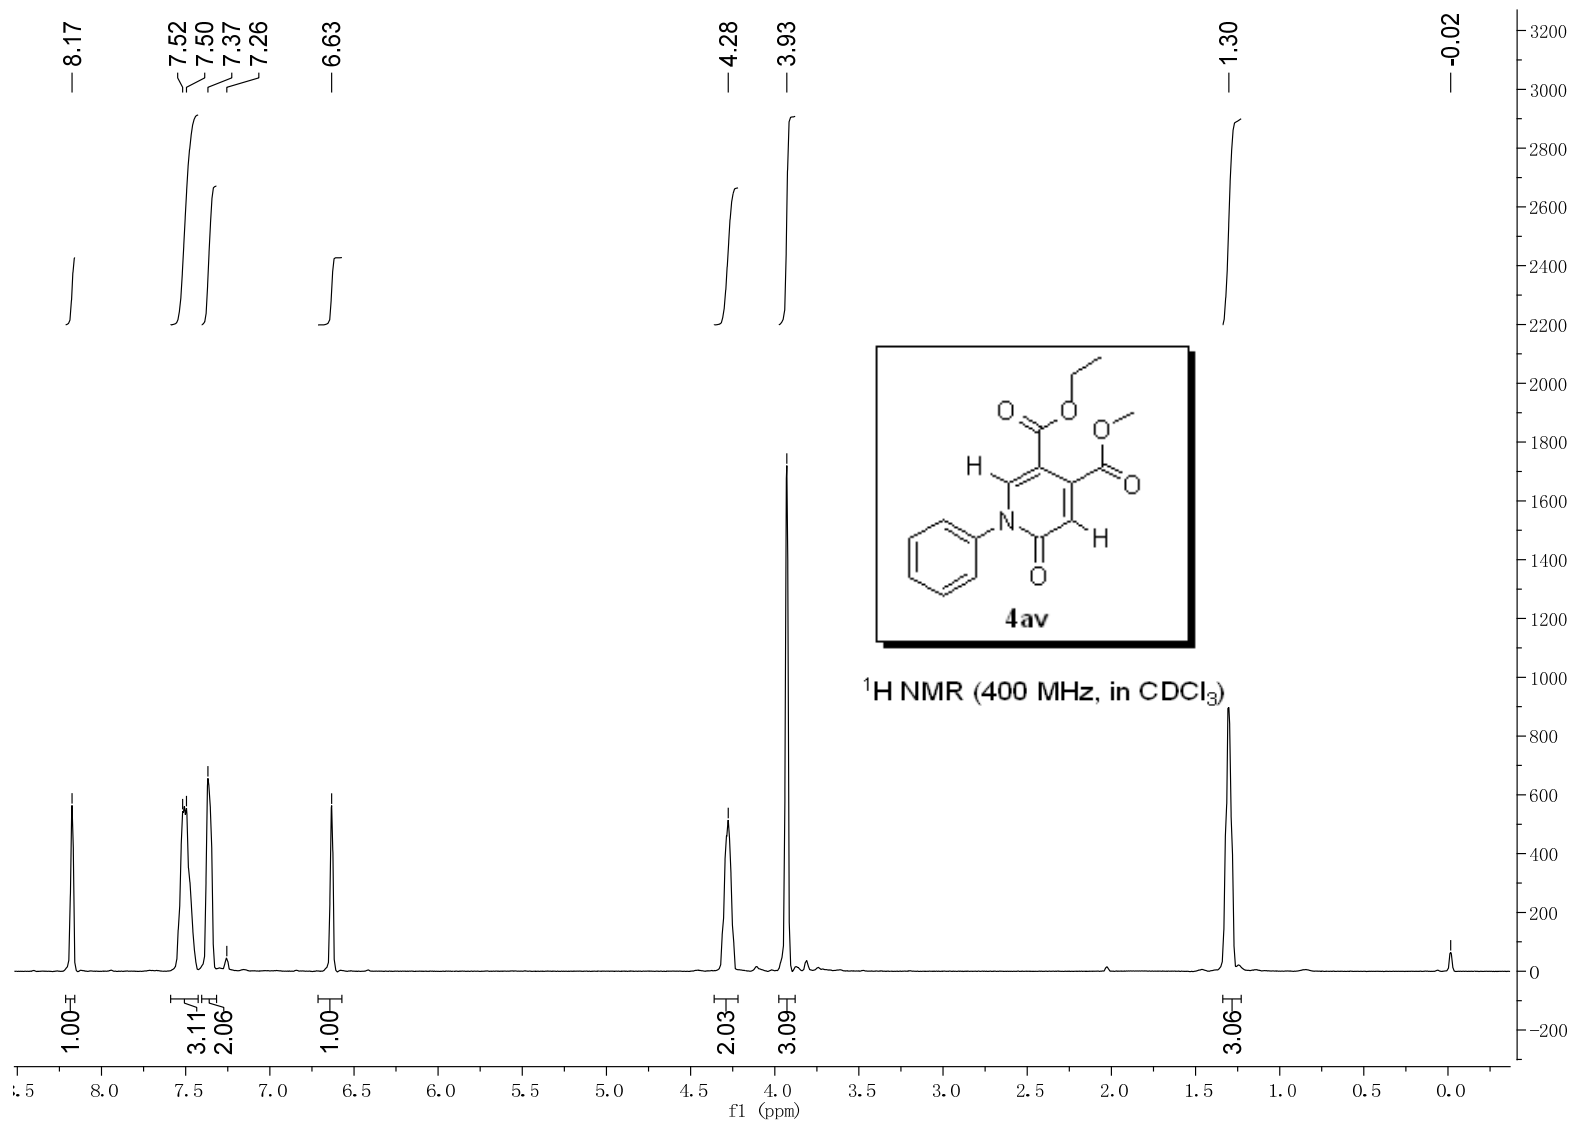

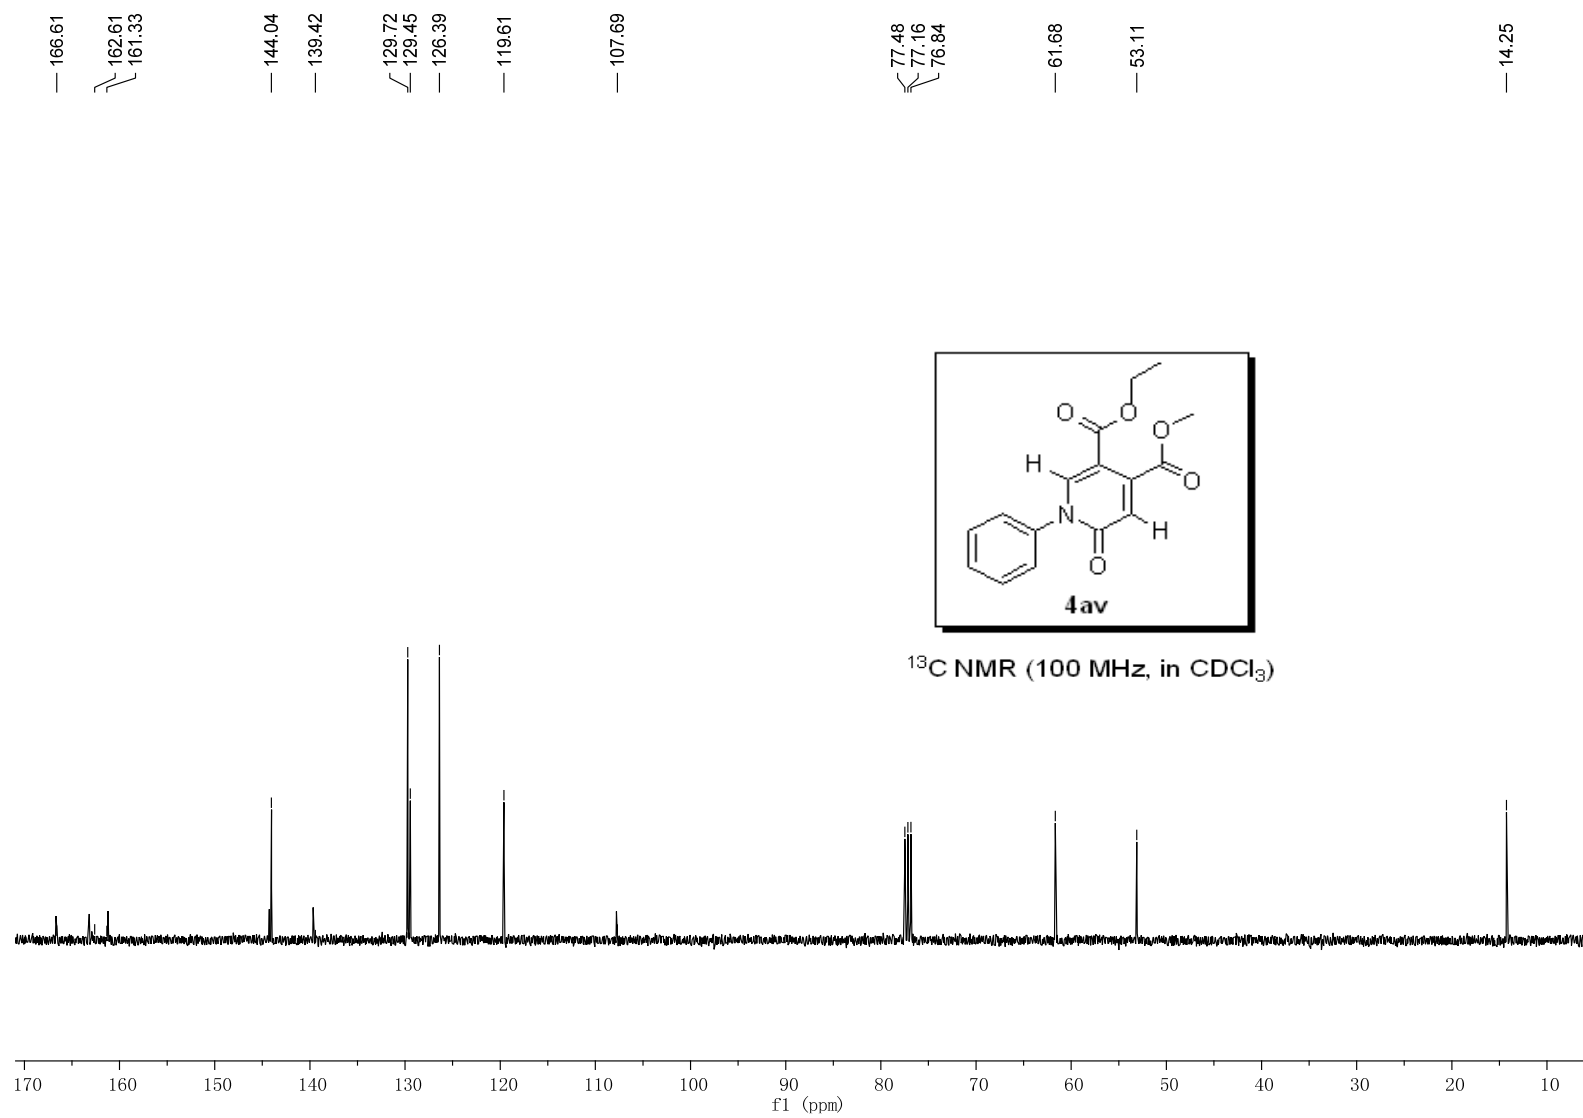



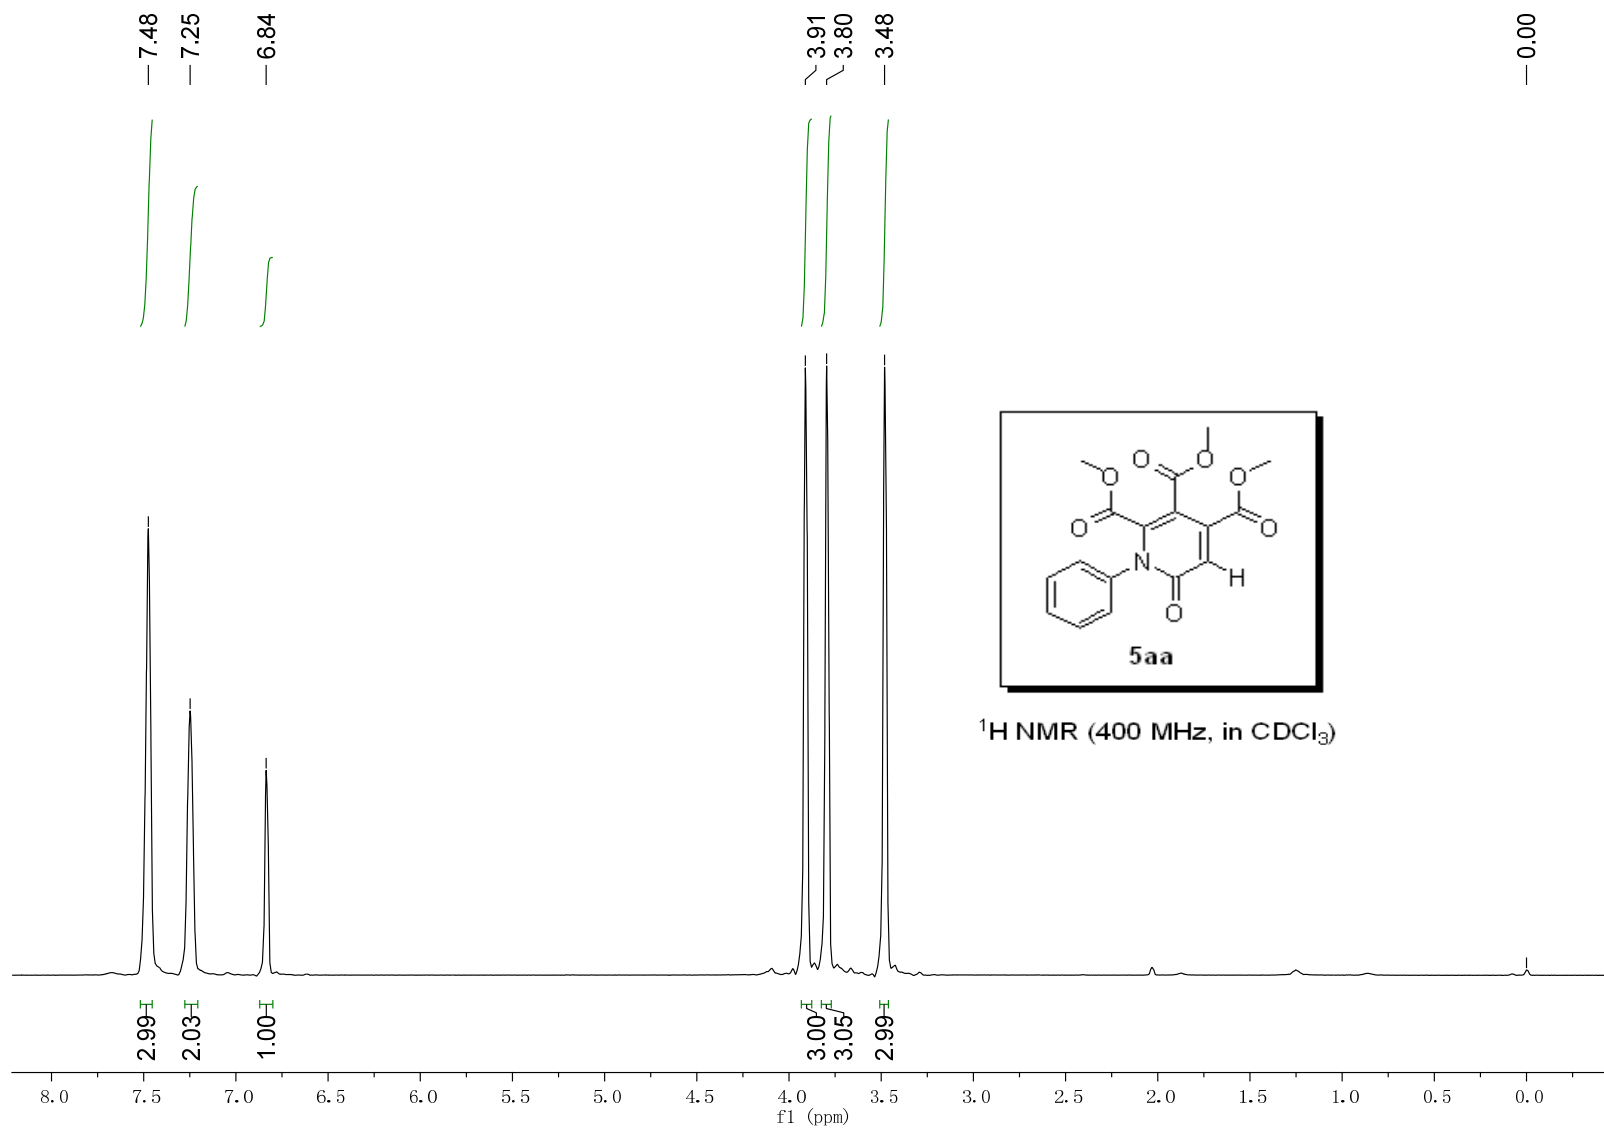

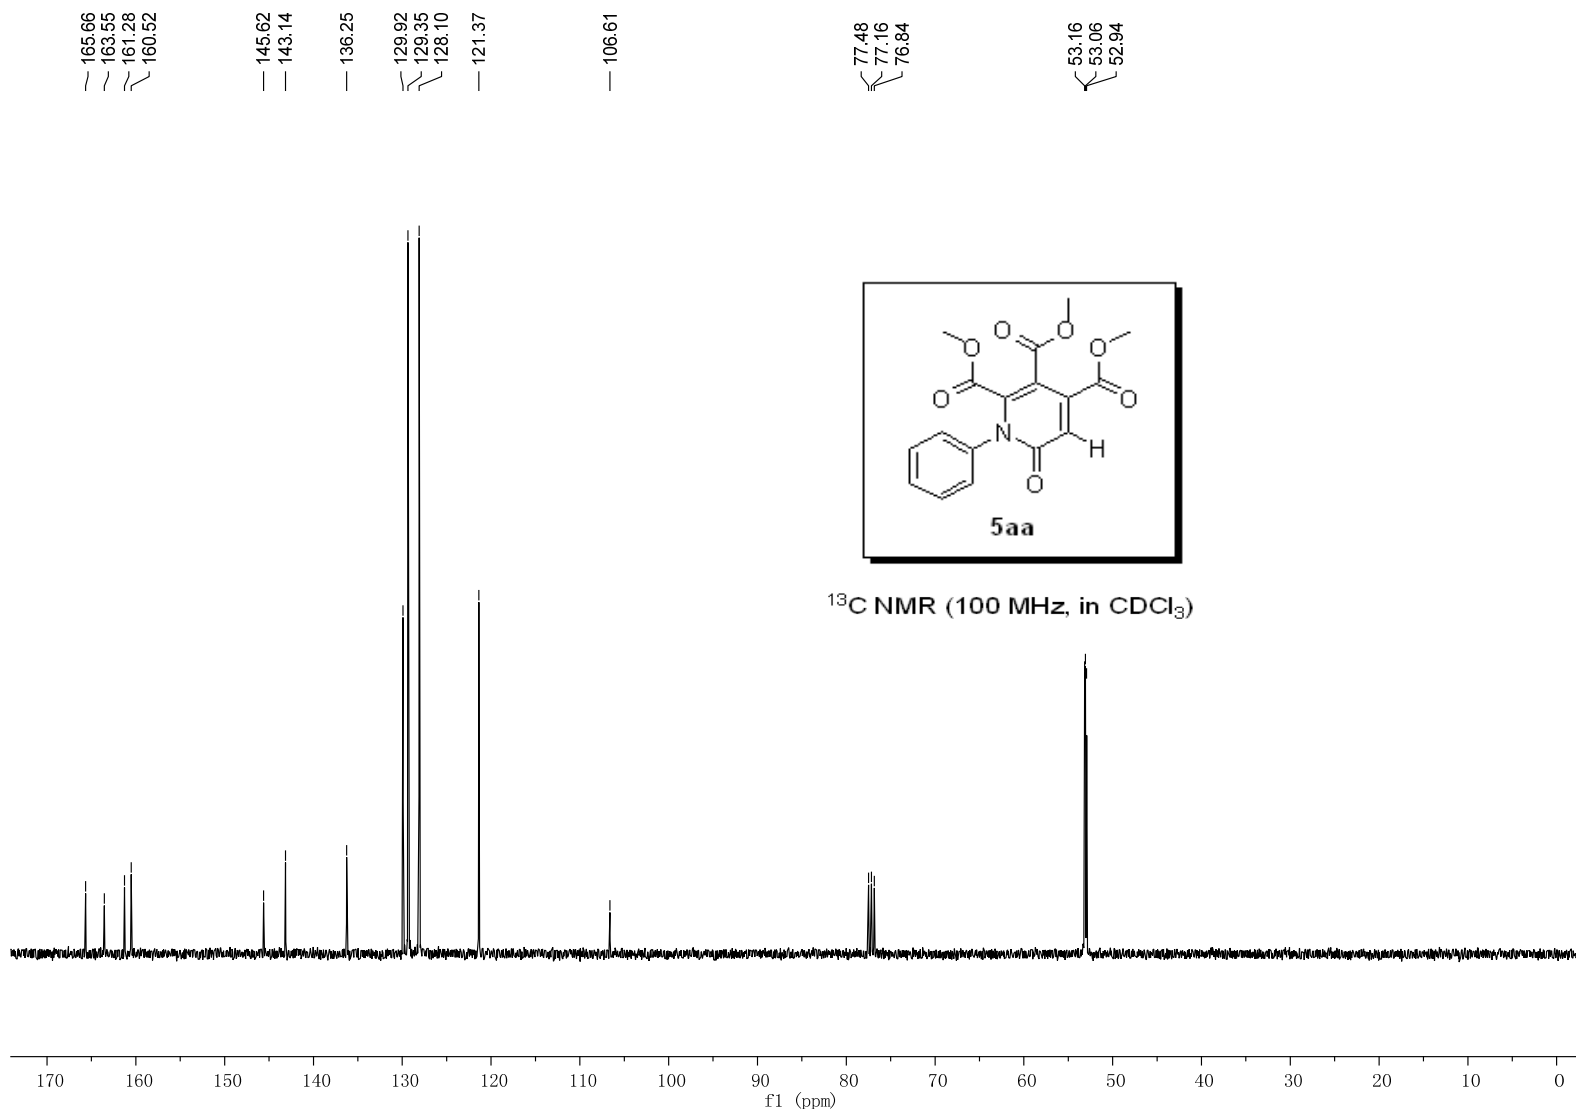

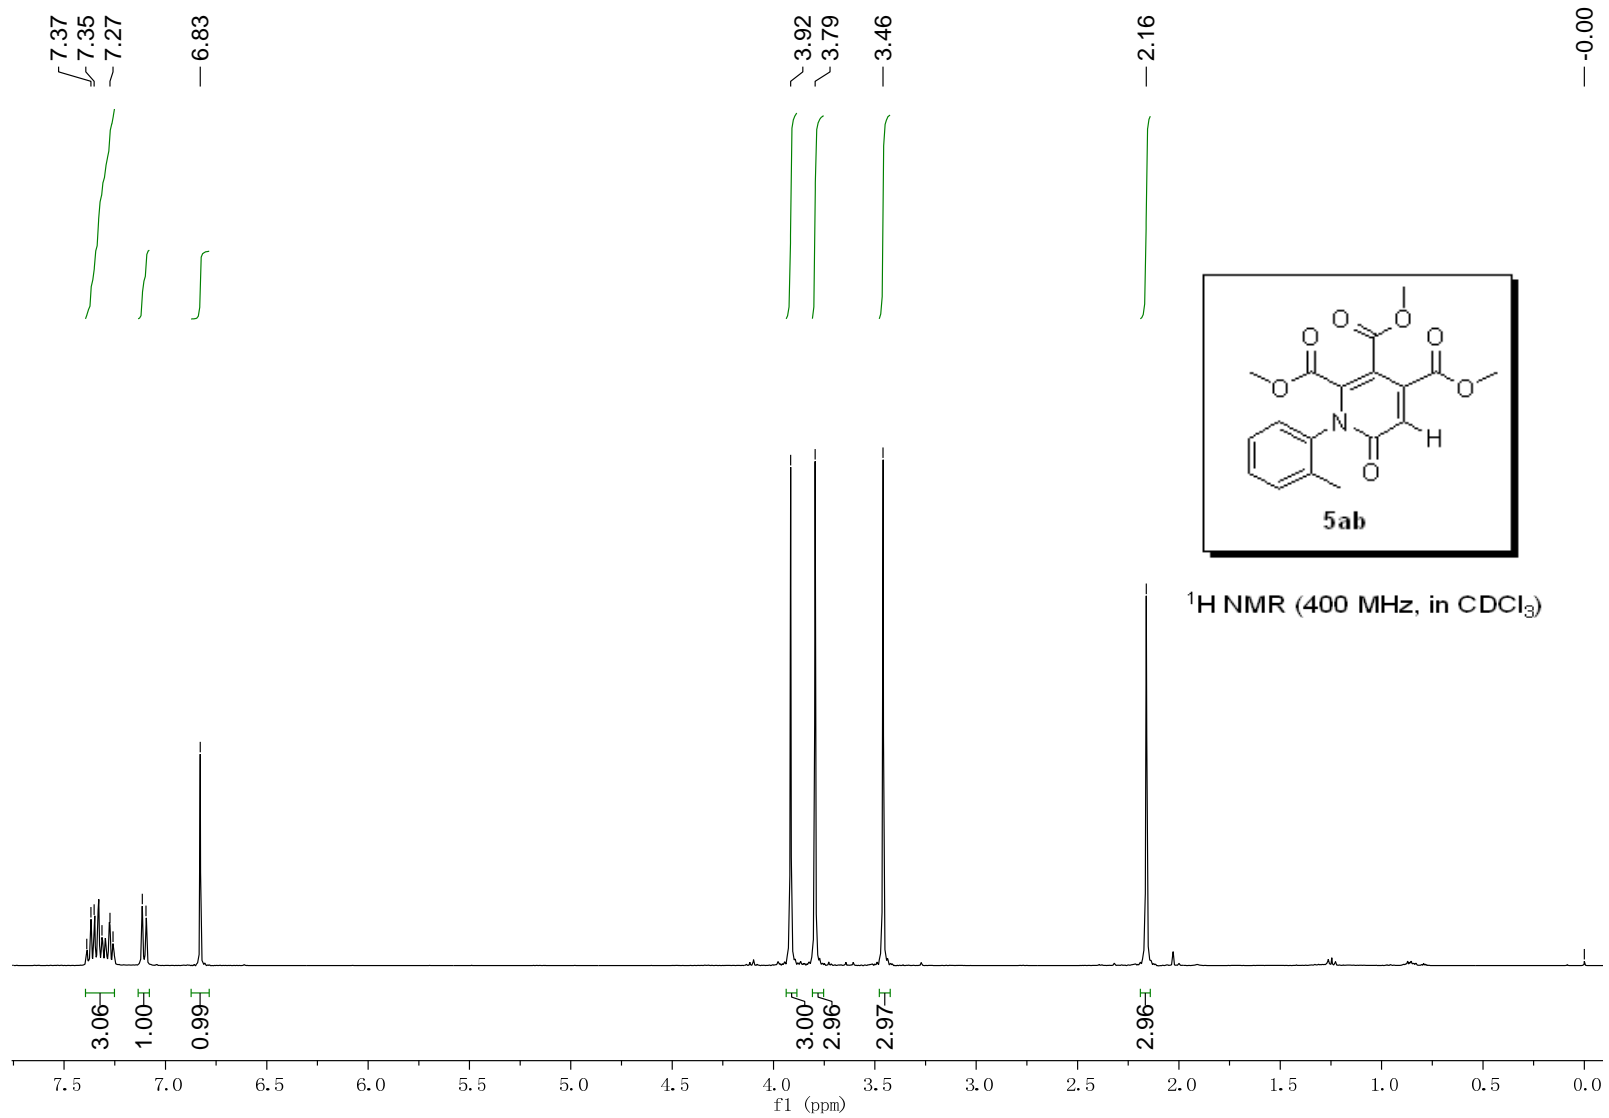

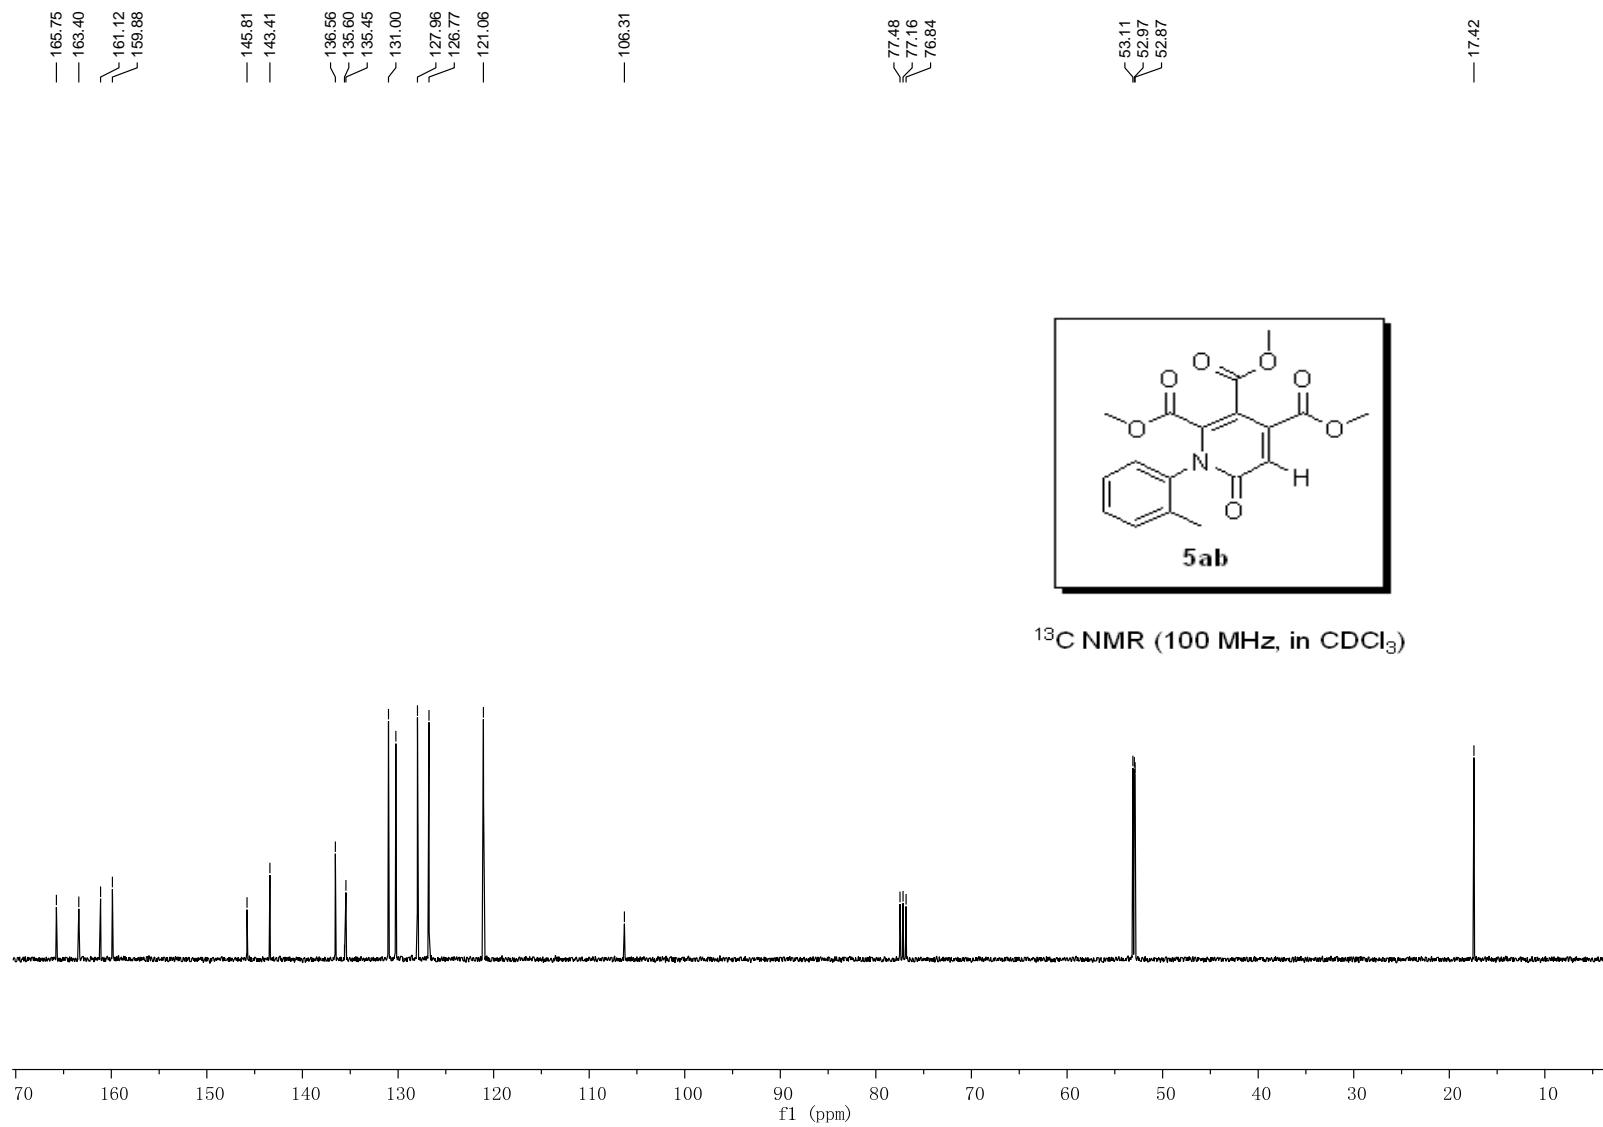

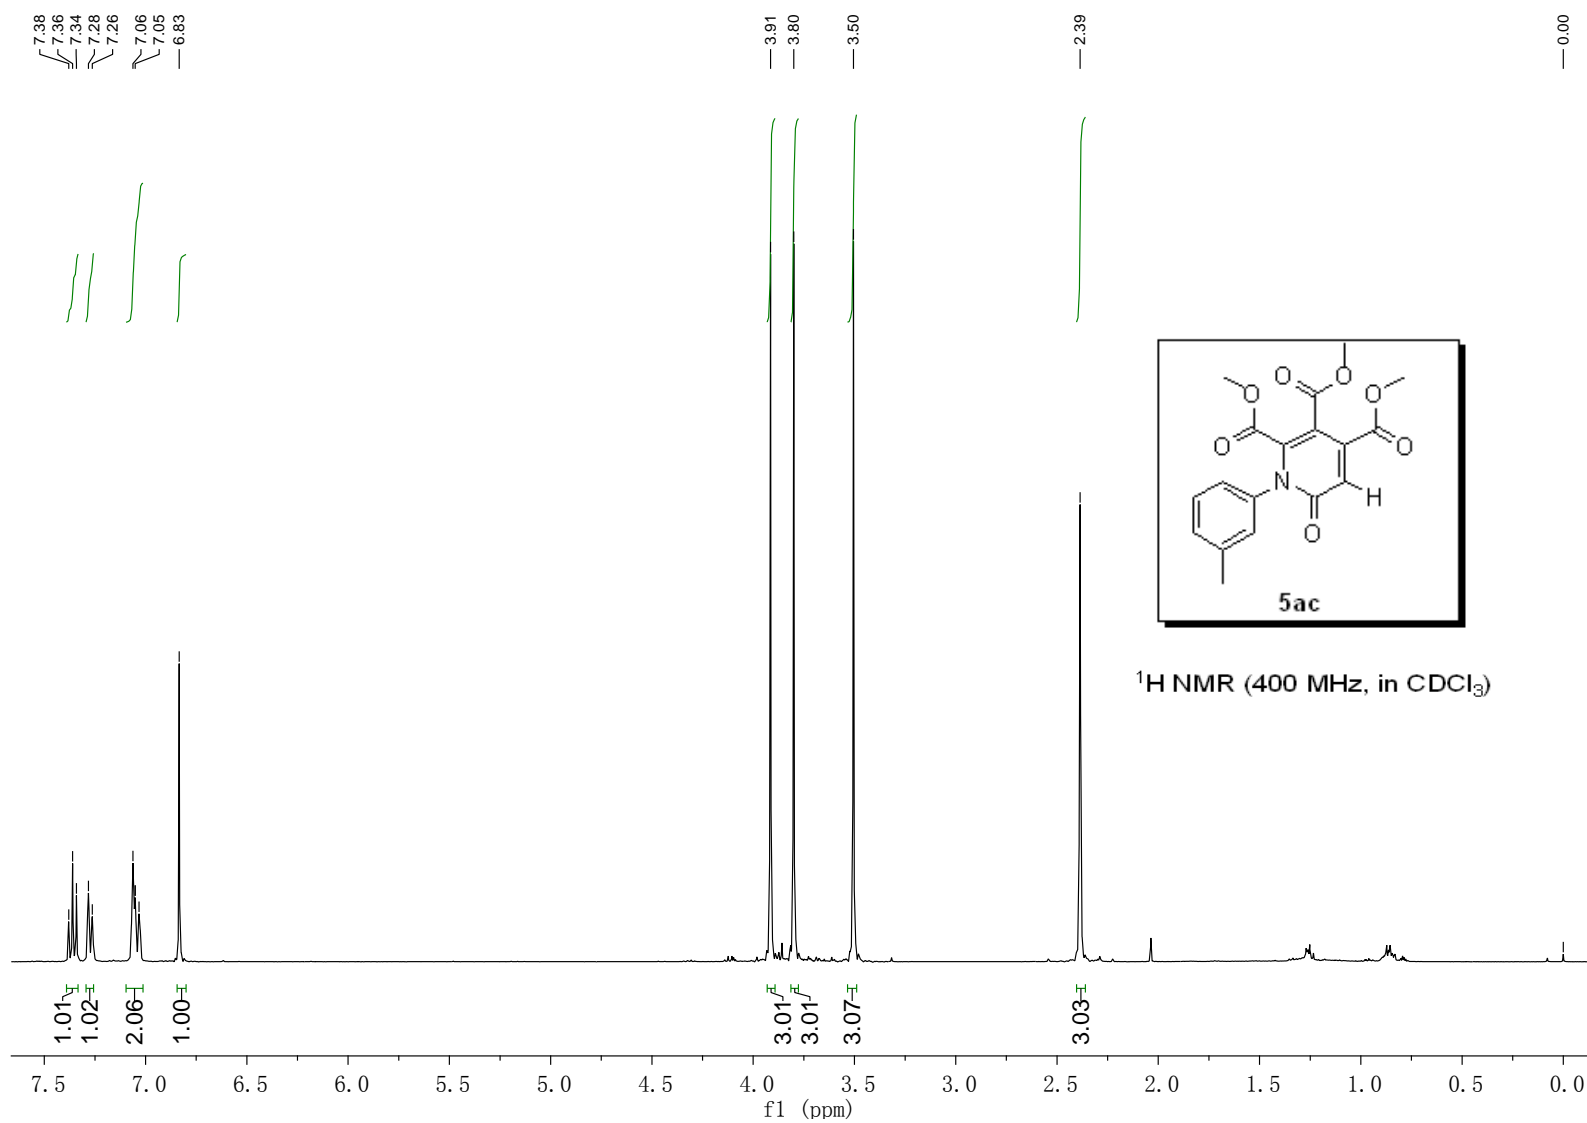

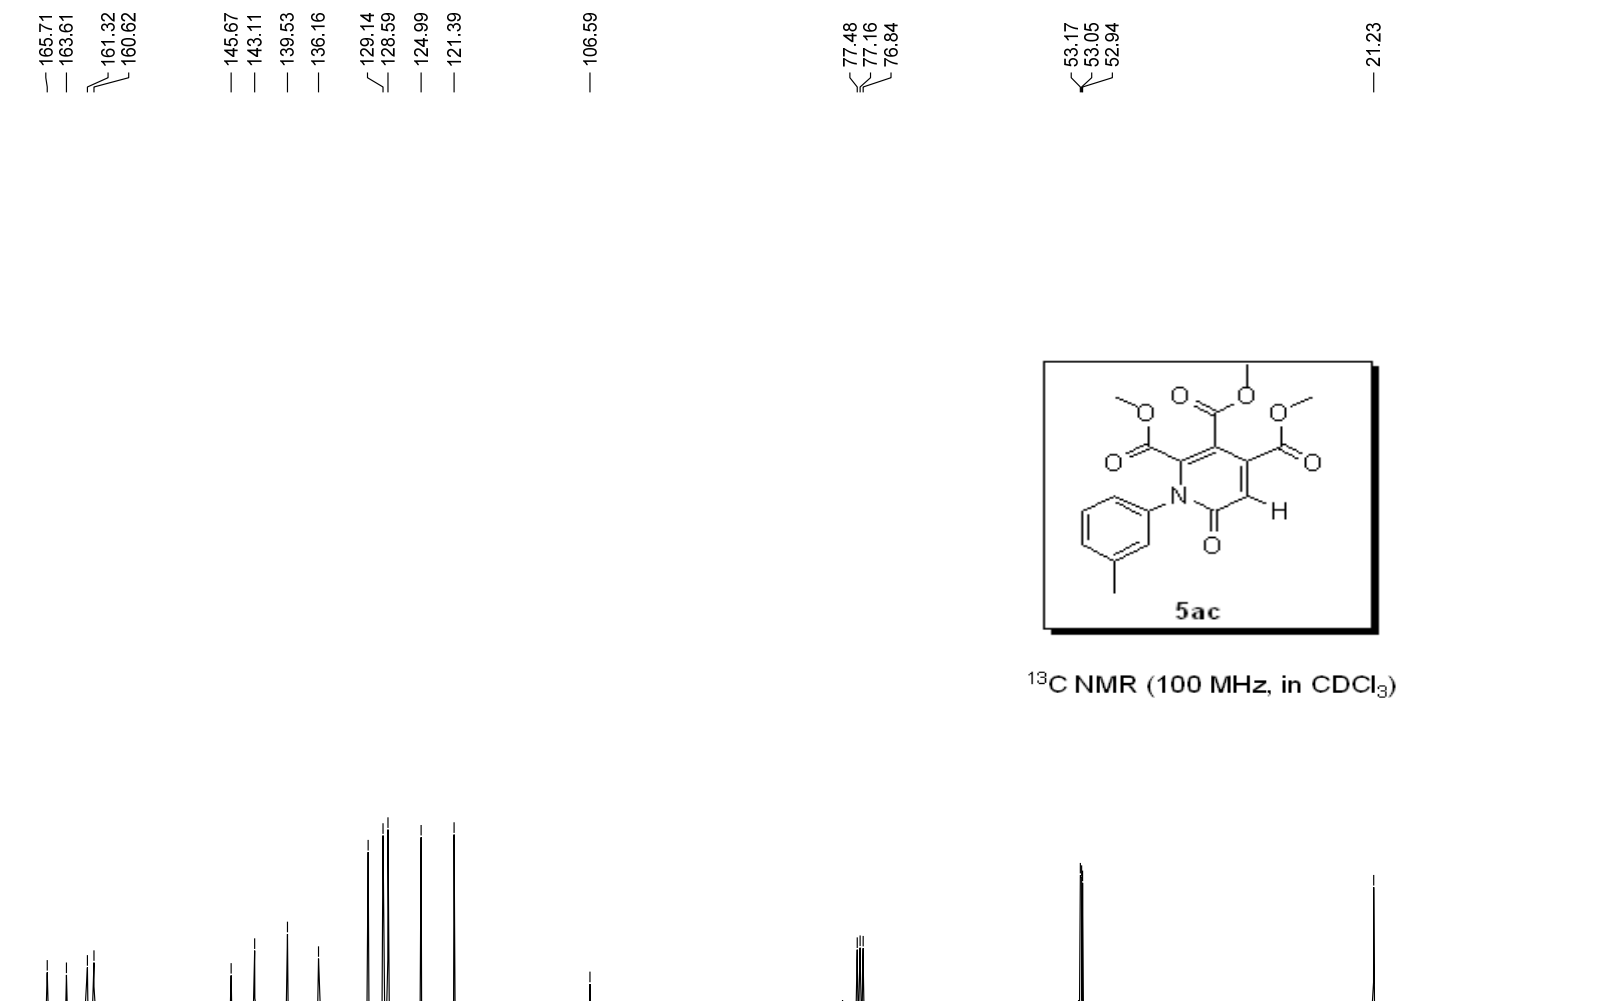

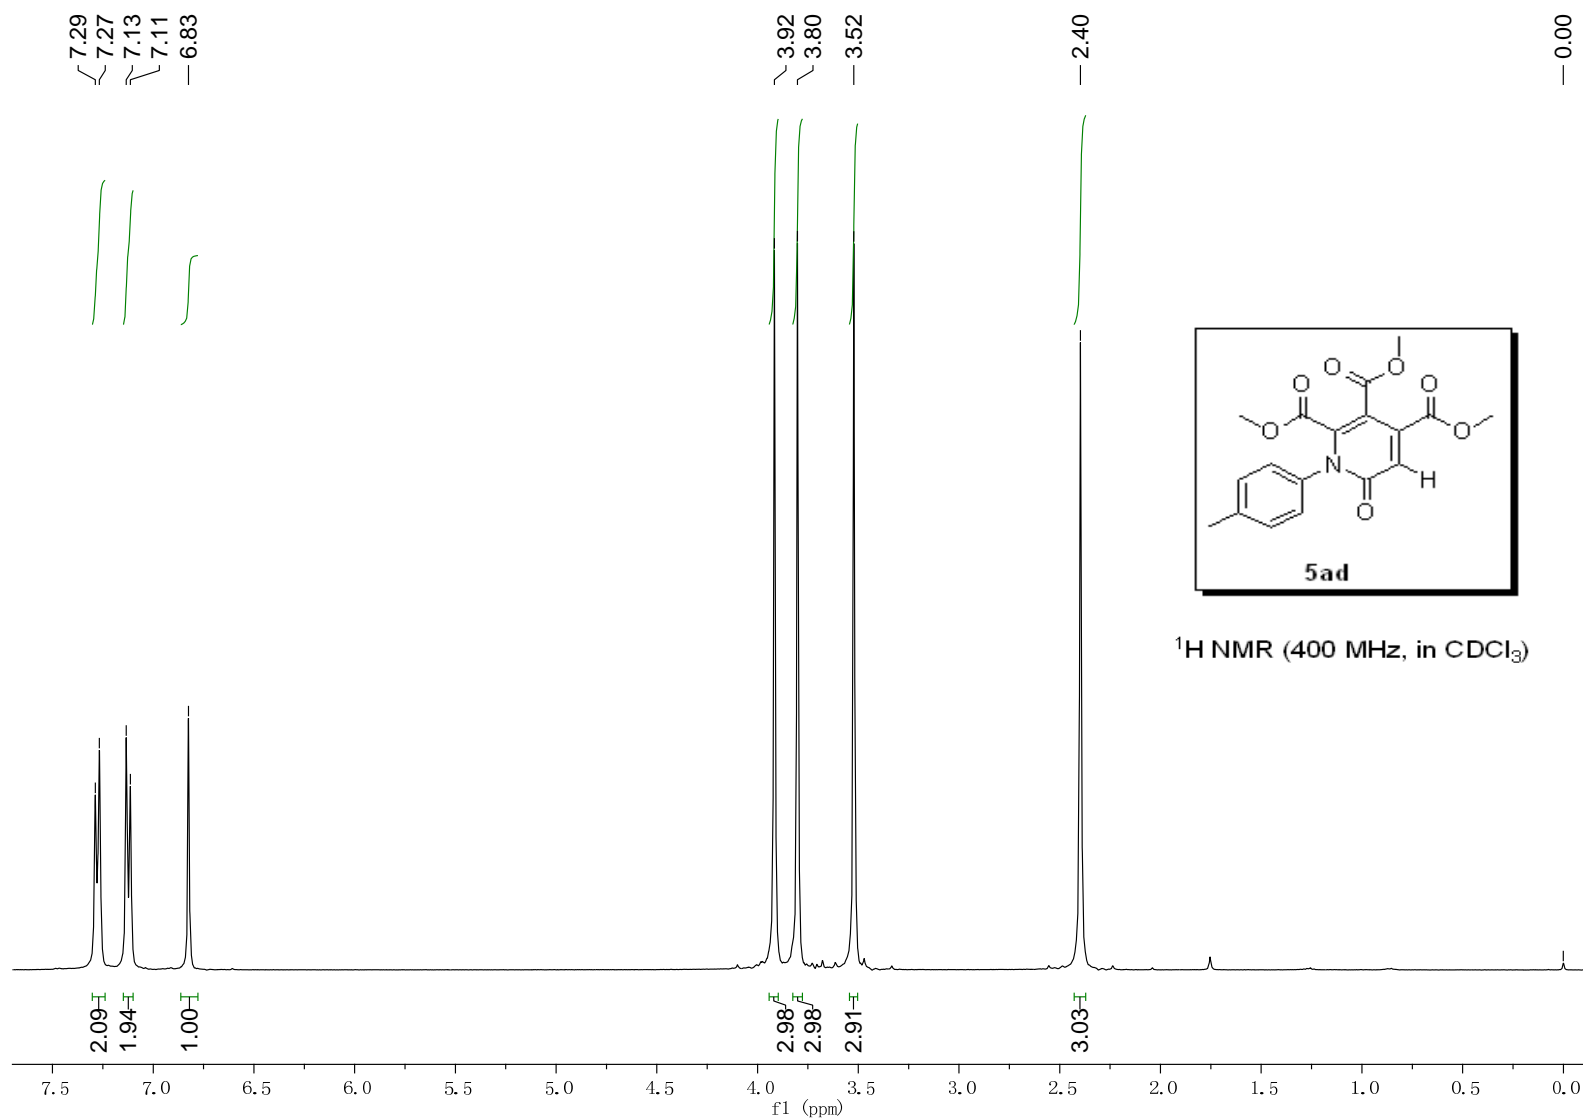

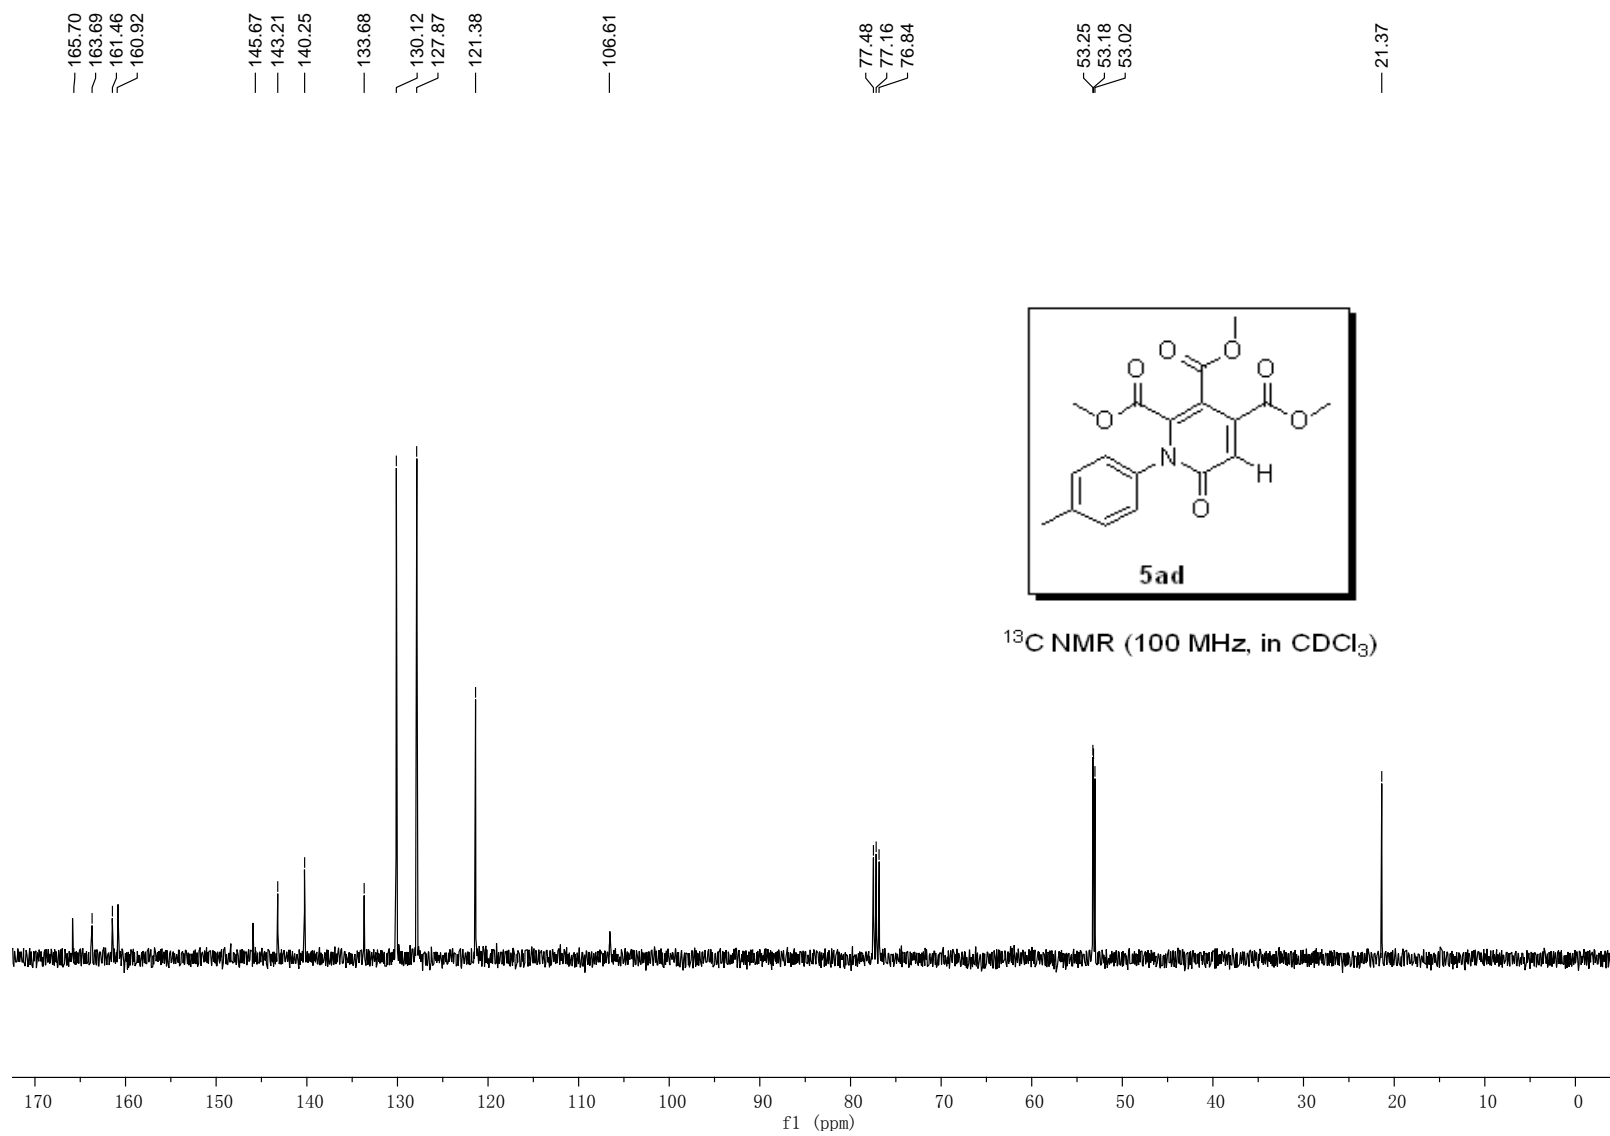



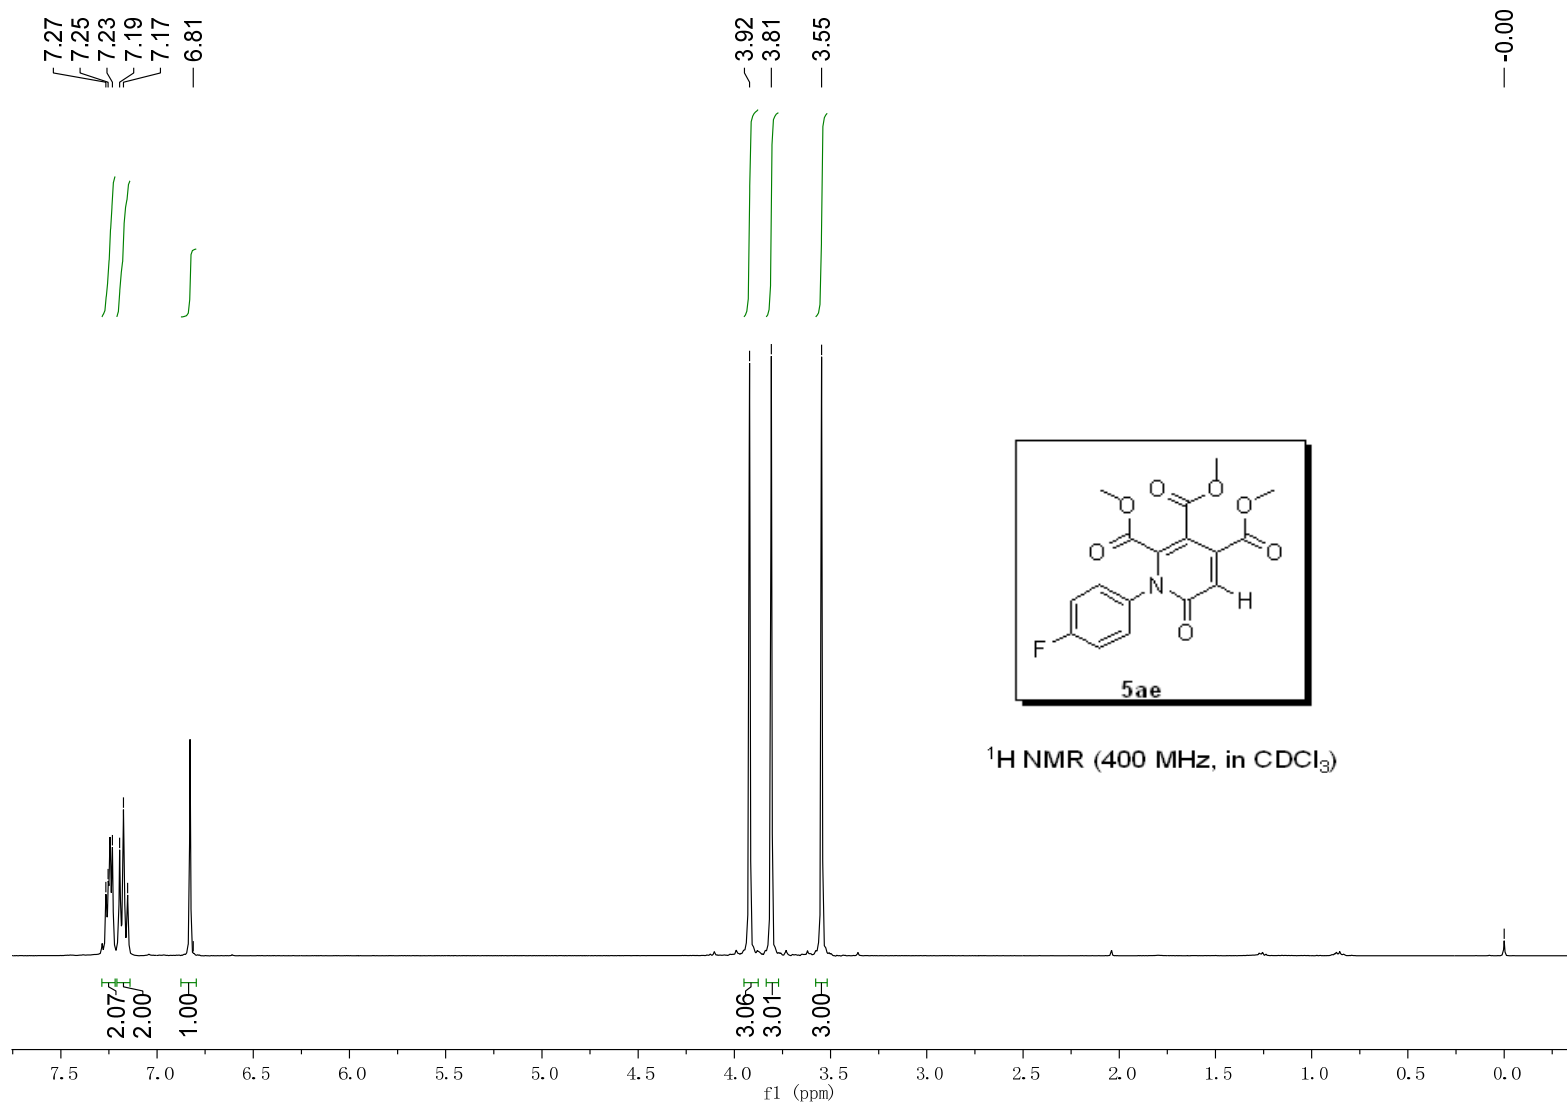

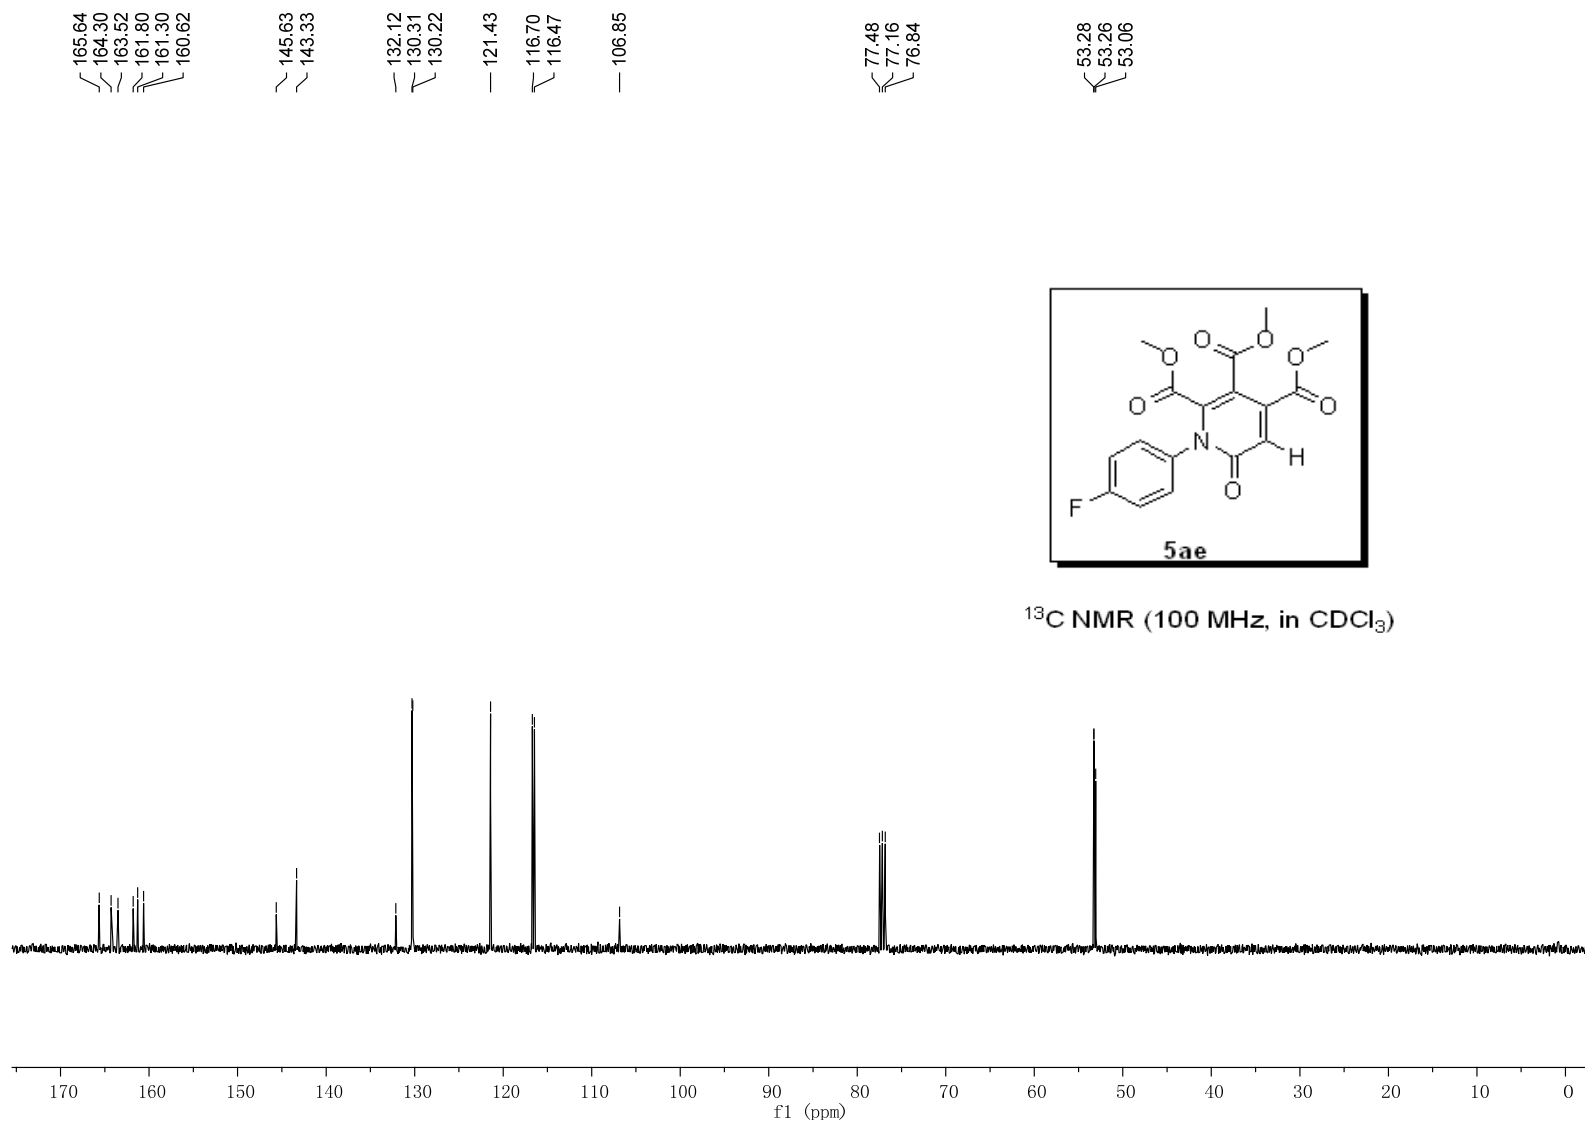

— -110.61

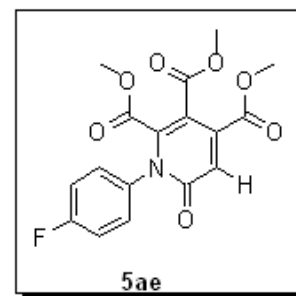

$^{19}\text{F}$  NMR (377 MHz, in  $\text{CDCl}_3$ )

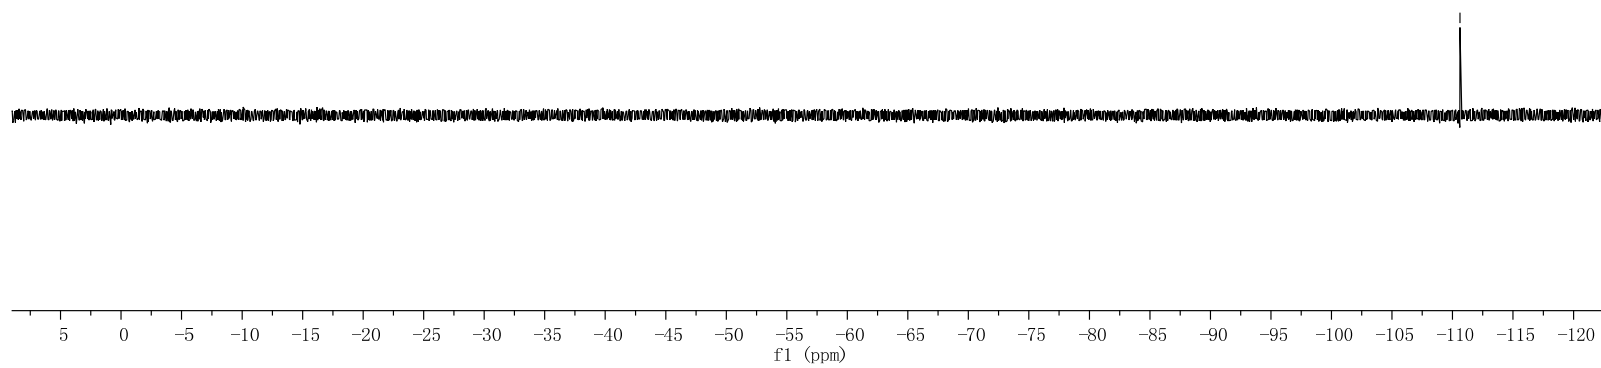

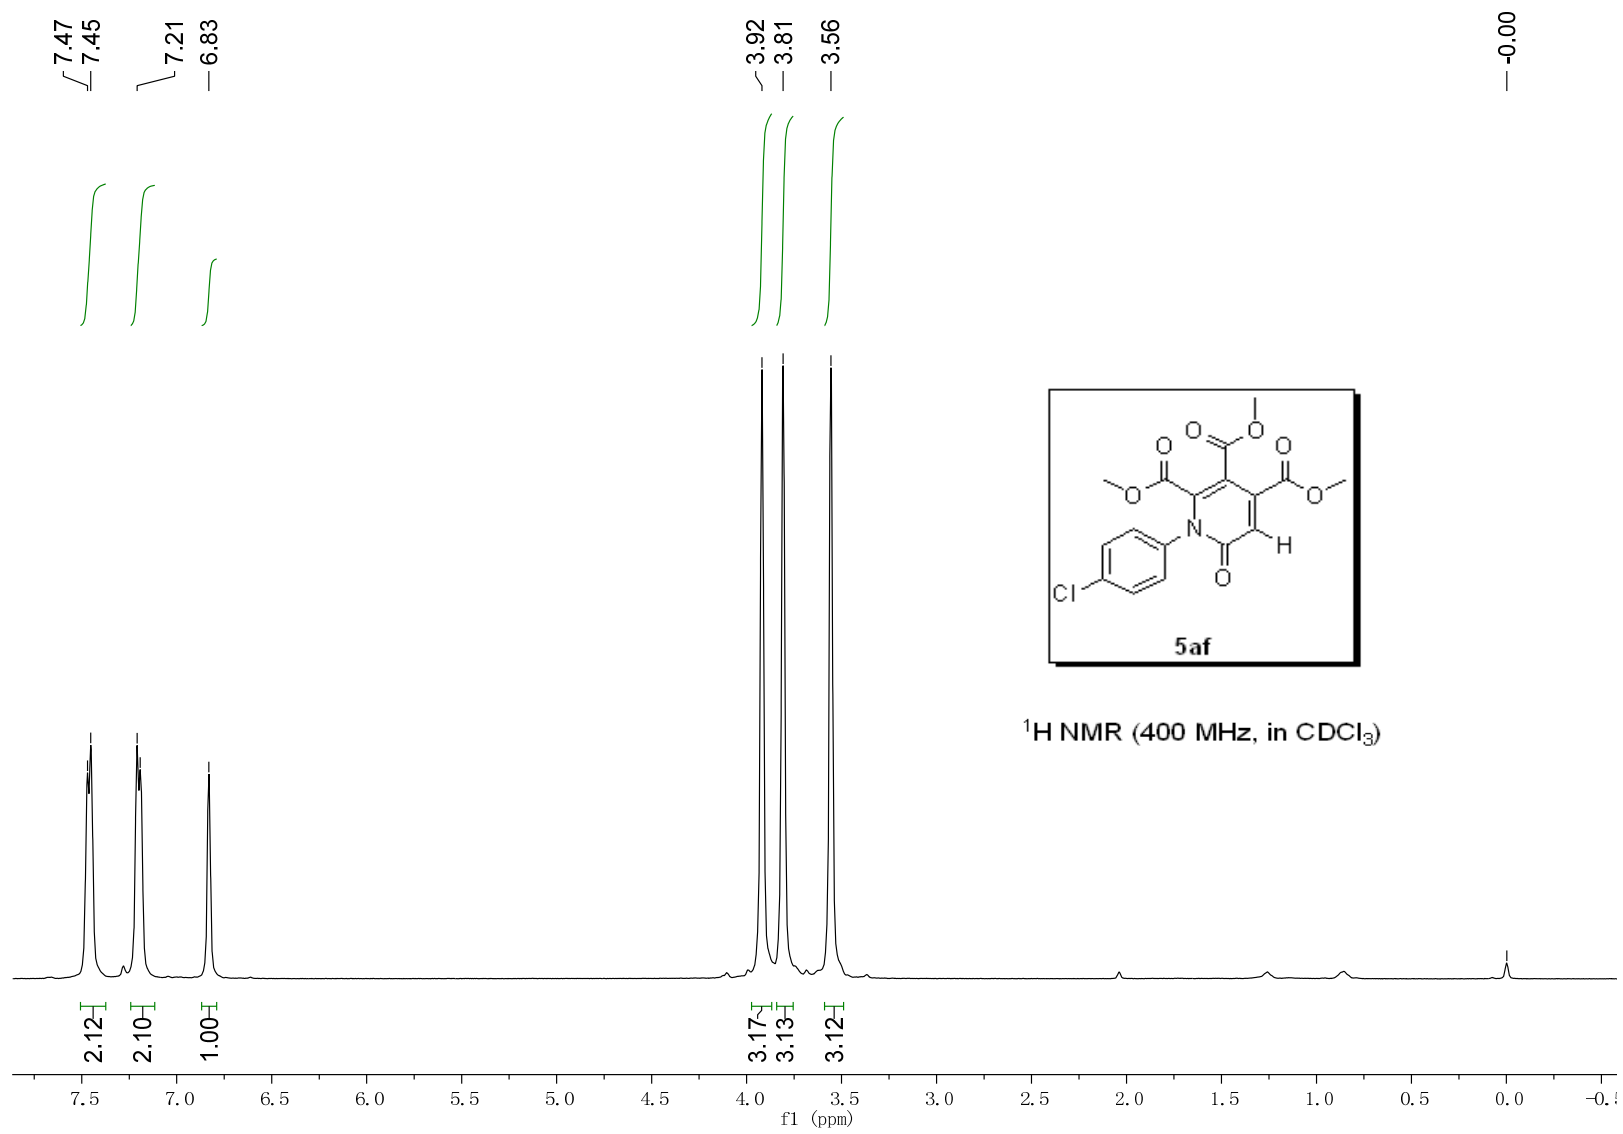

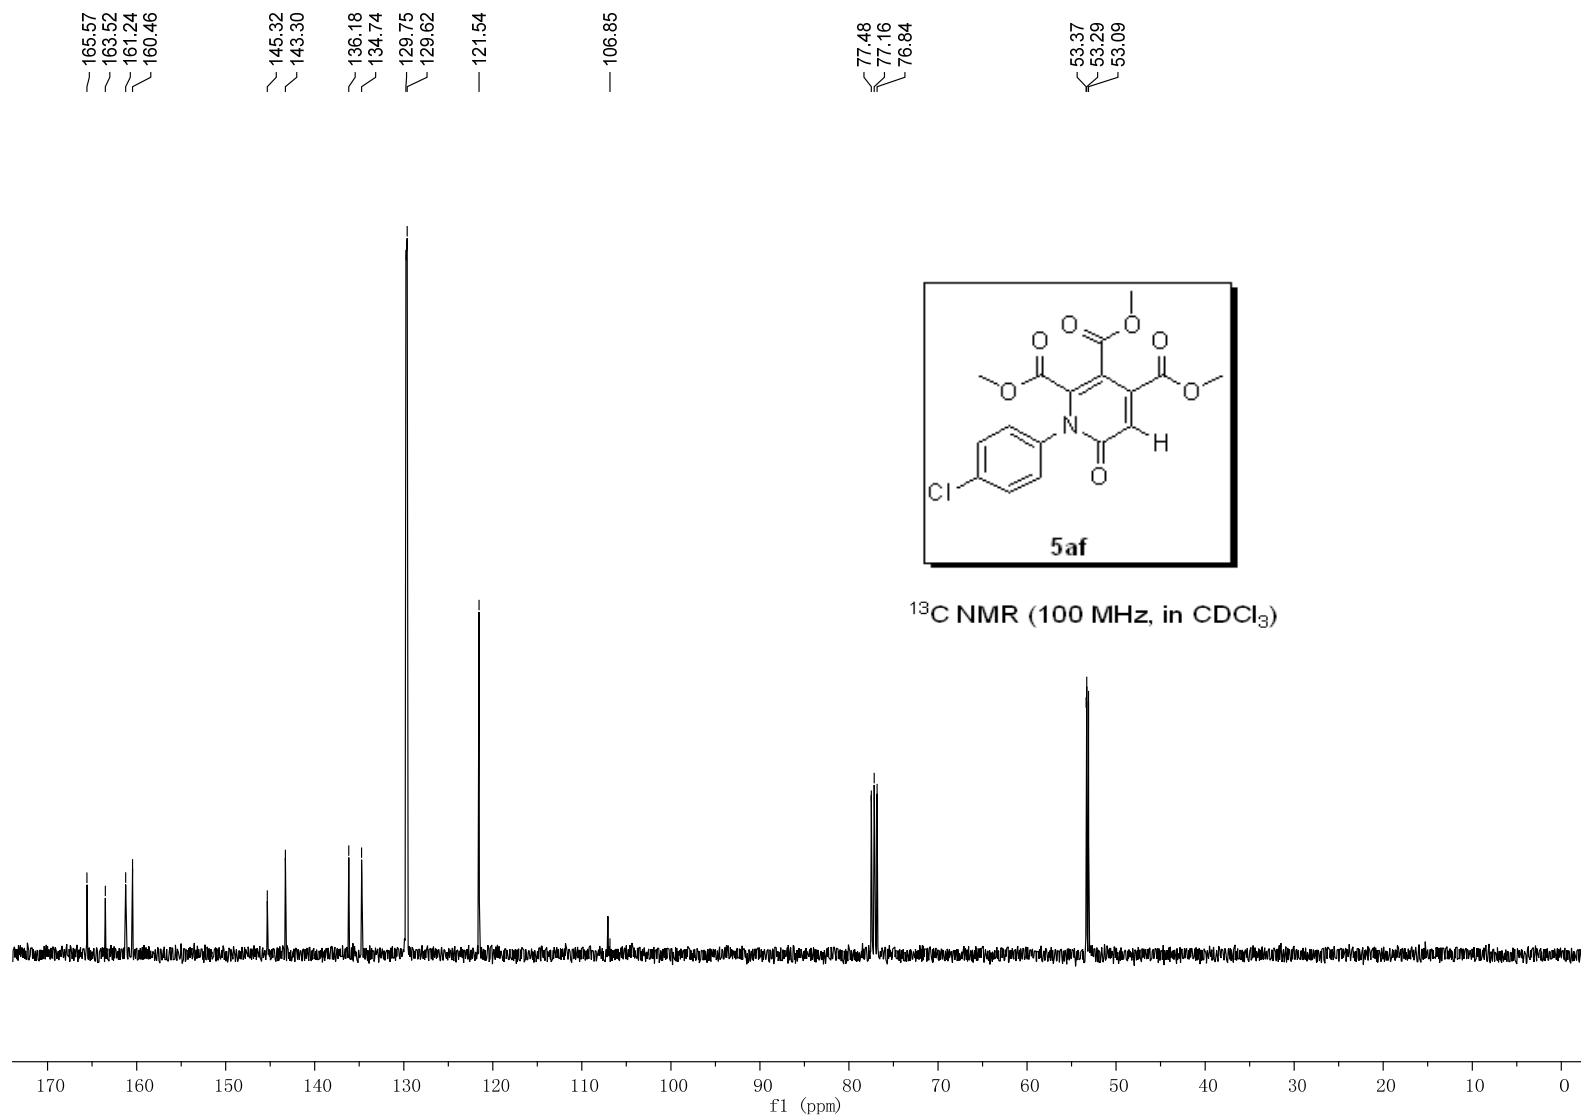

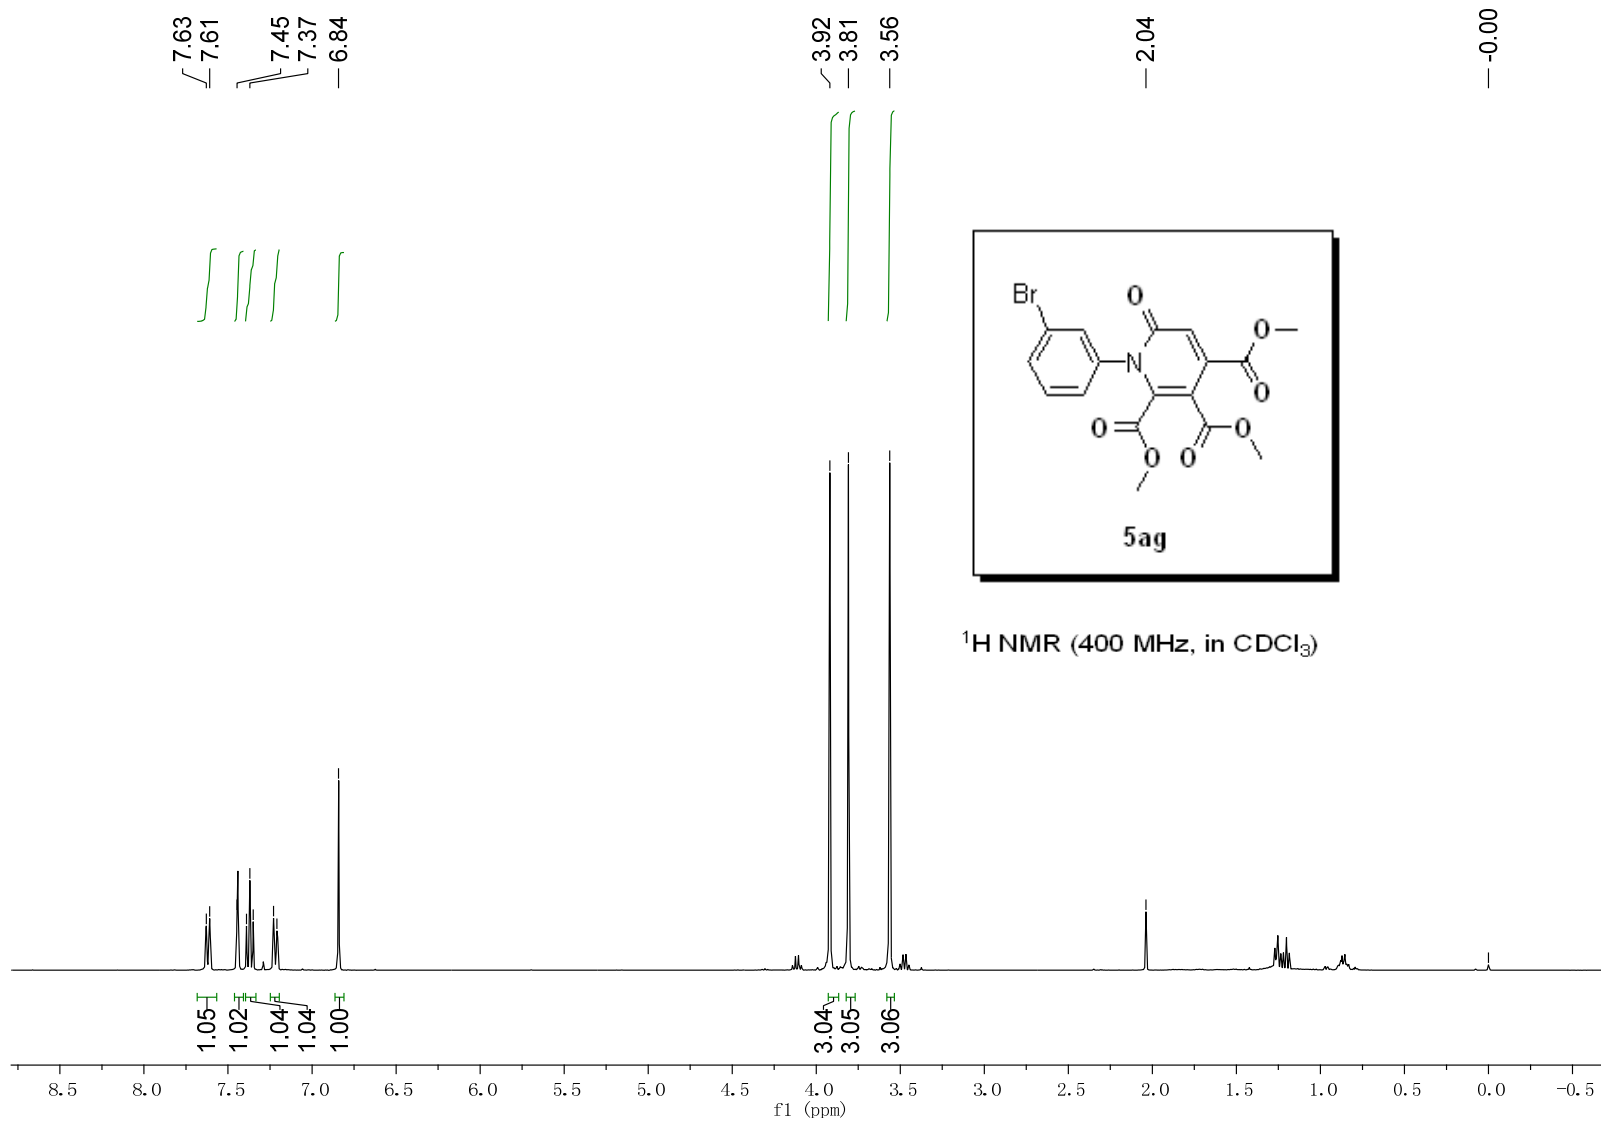

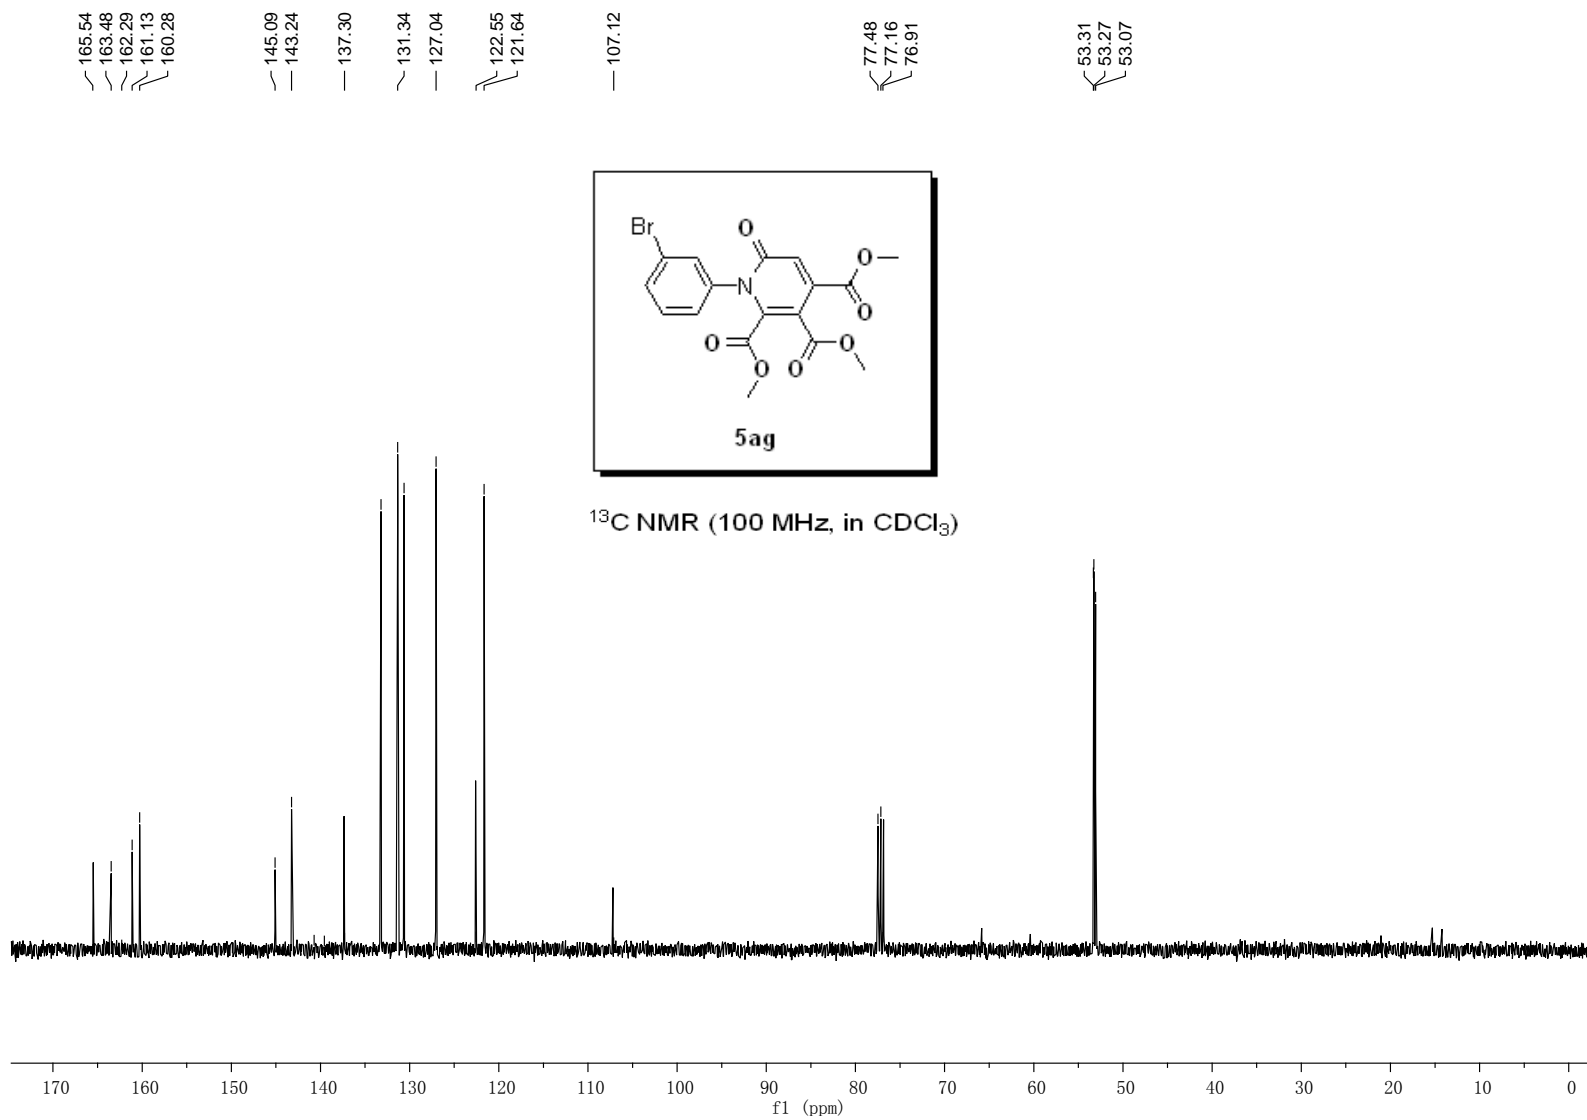

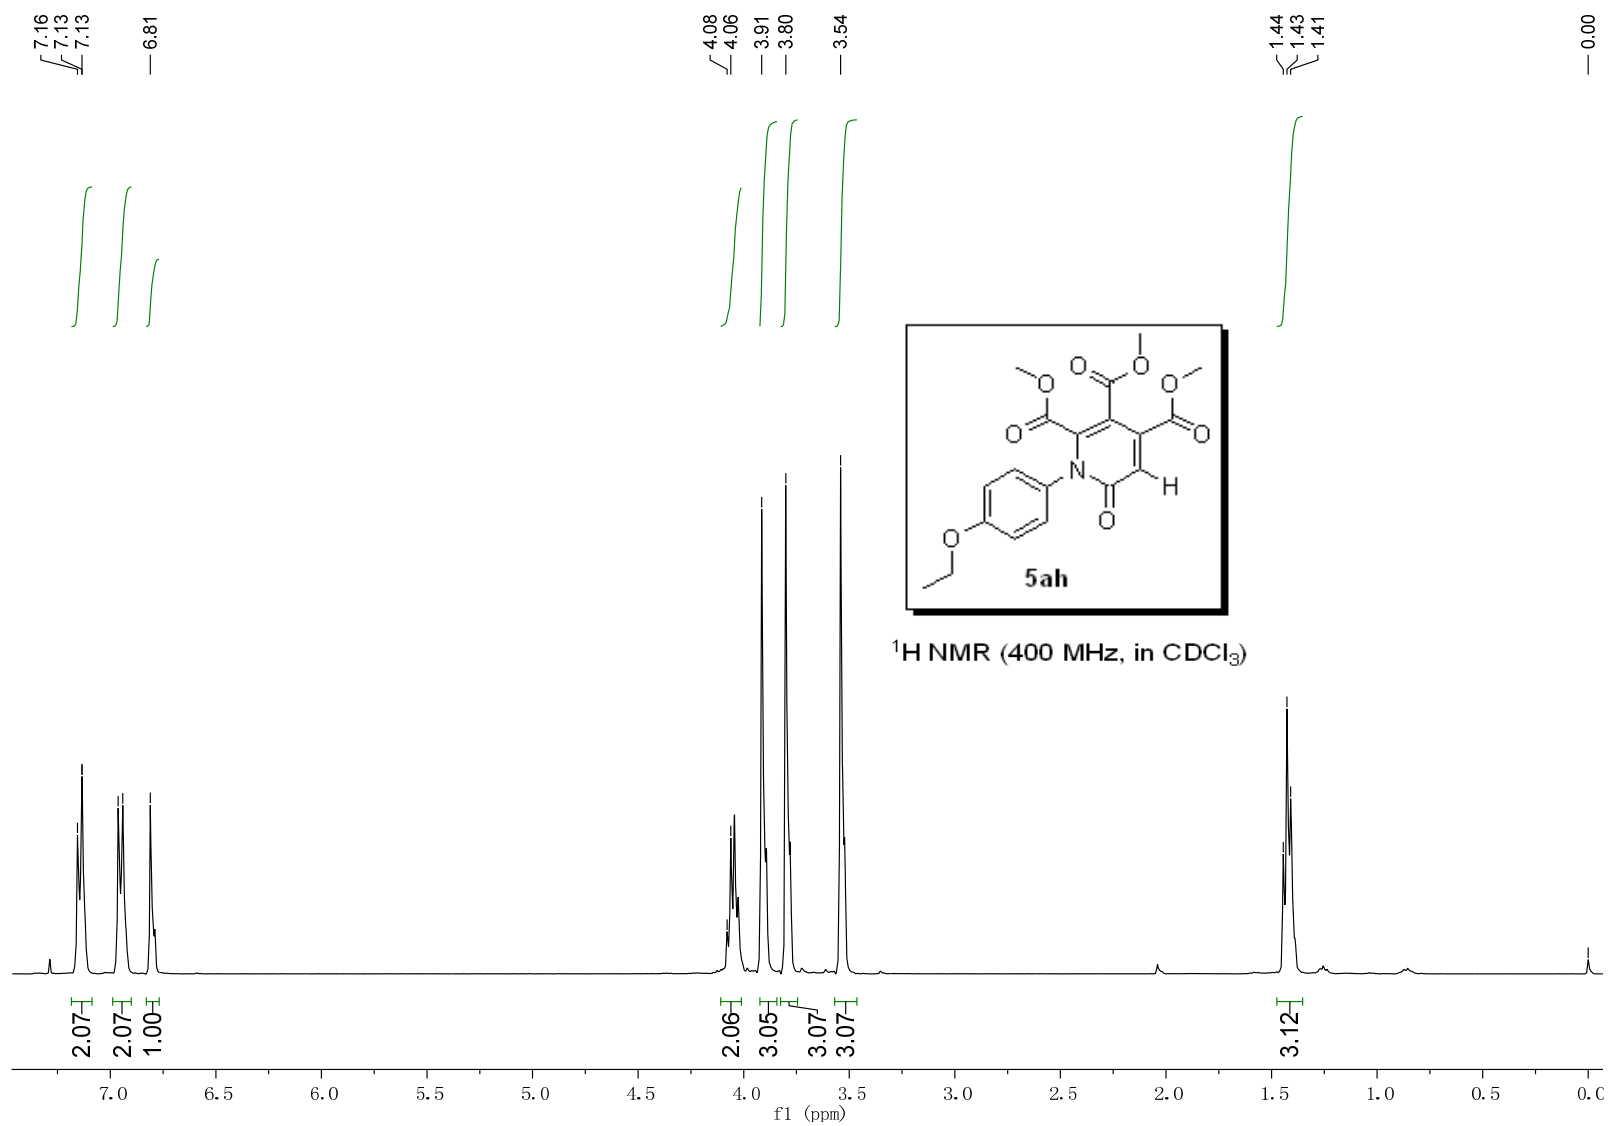



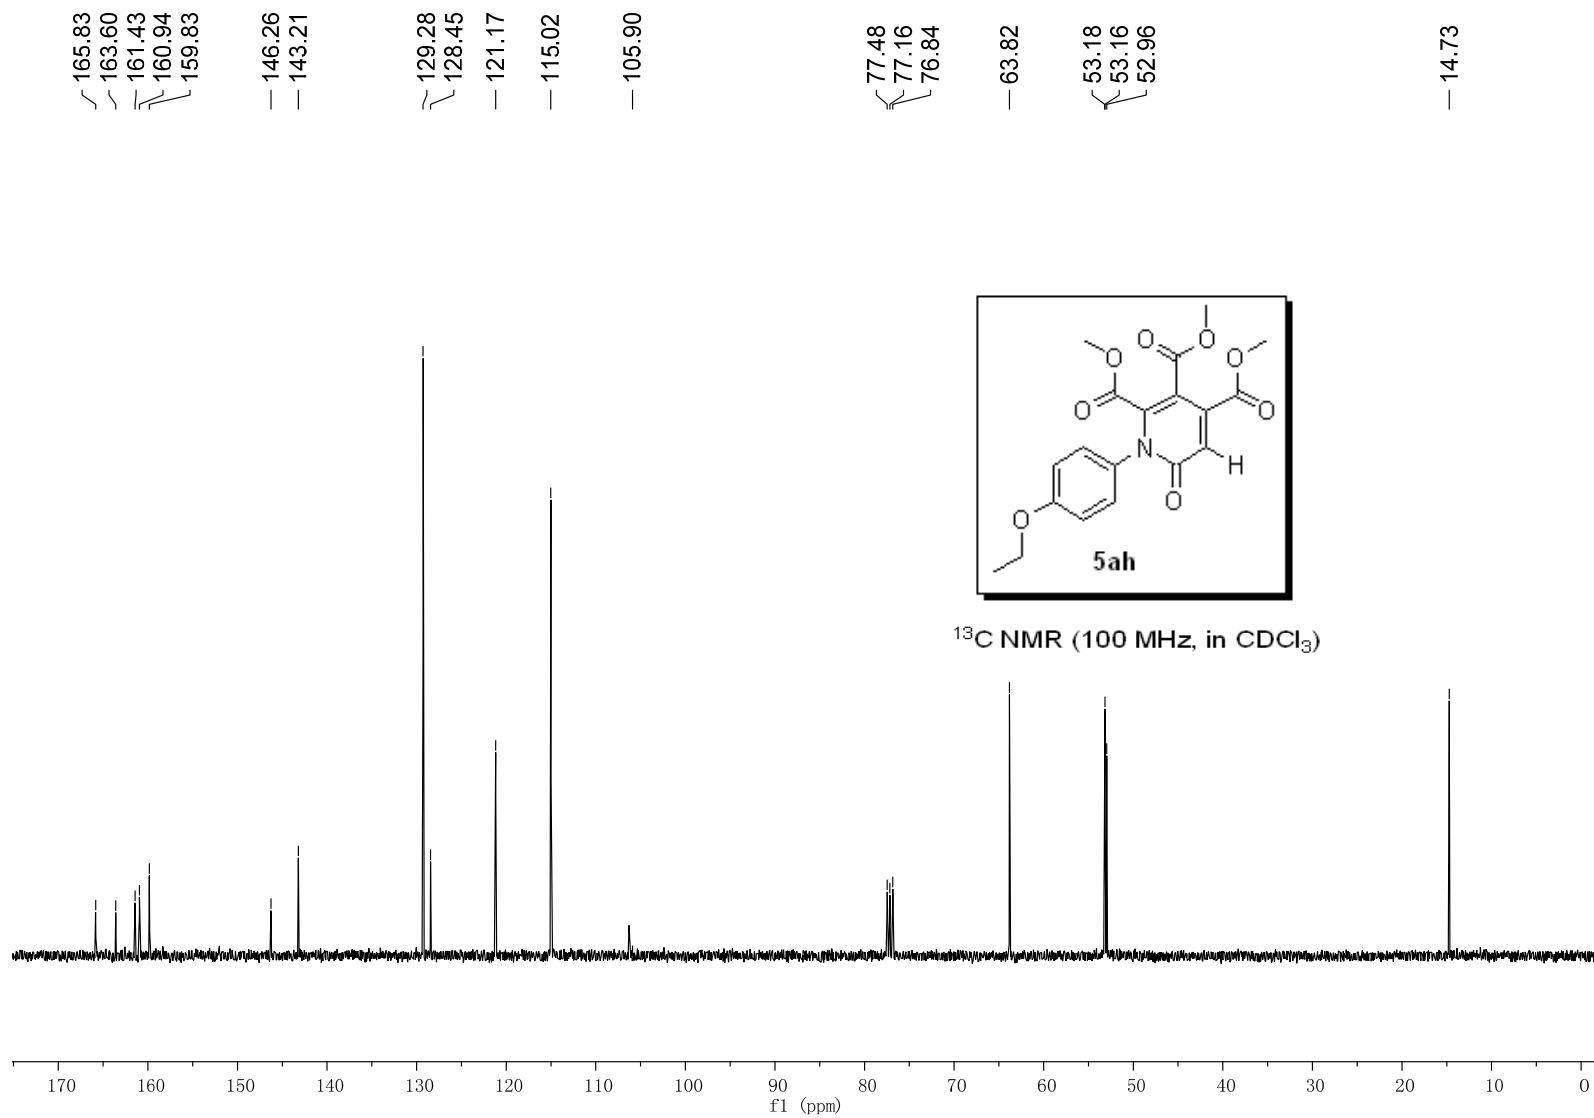

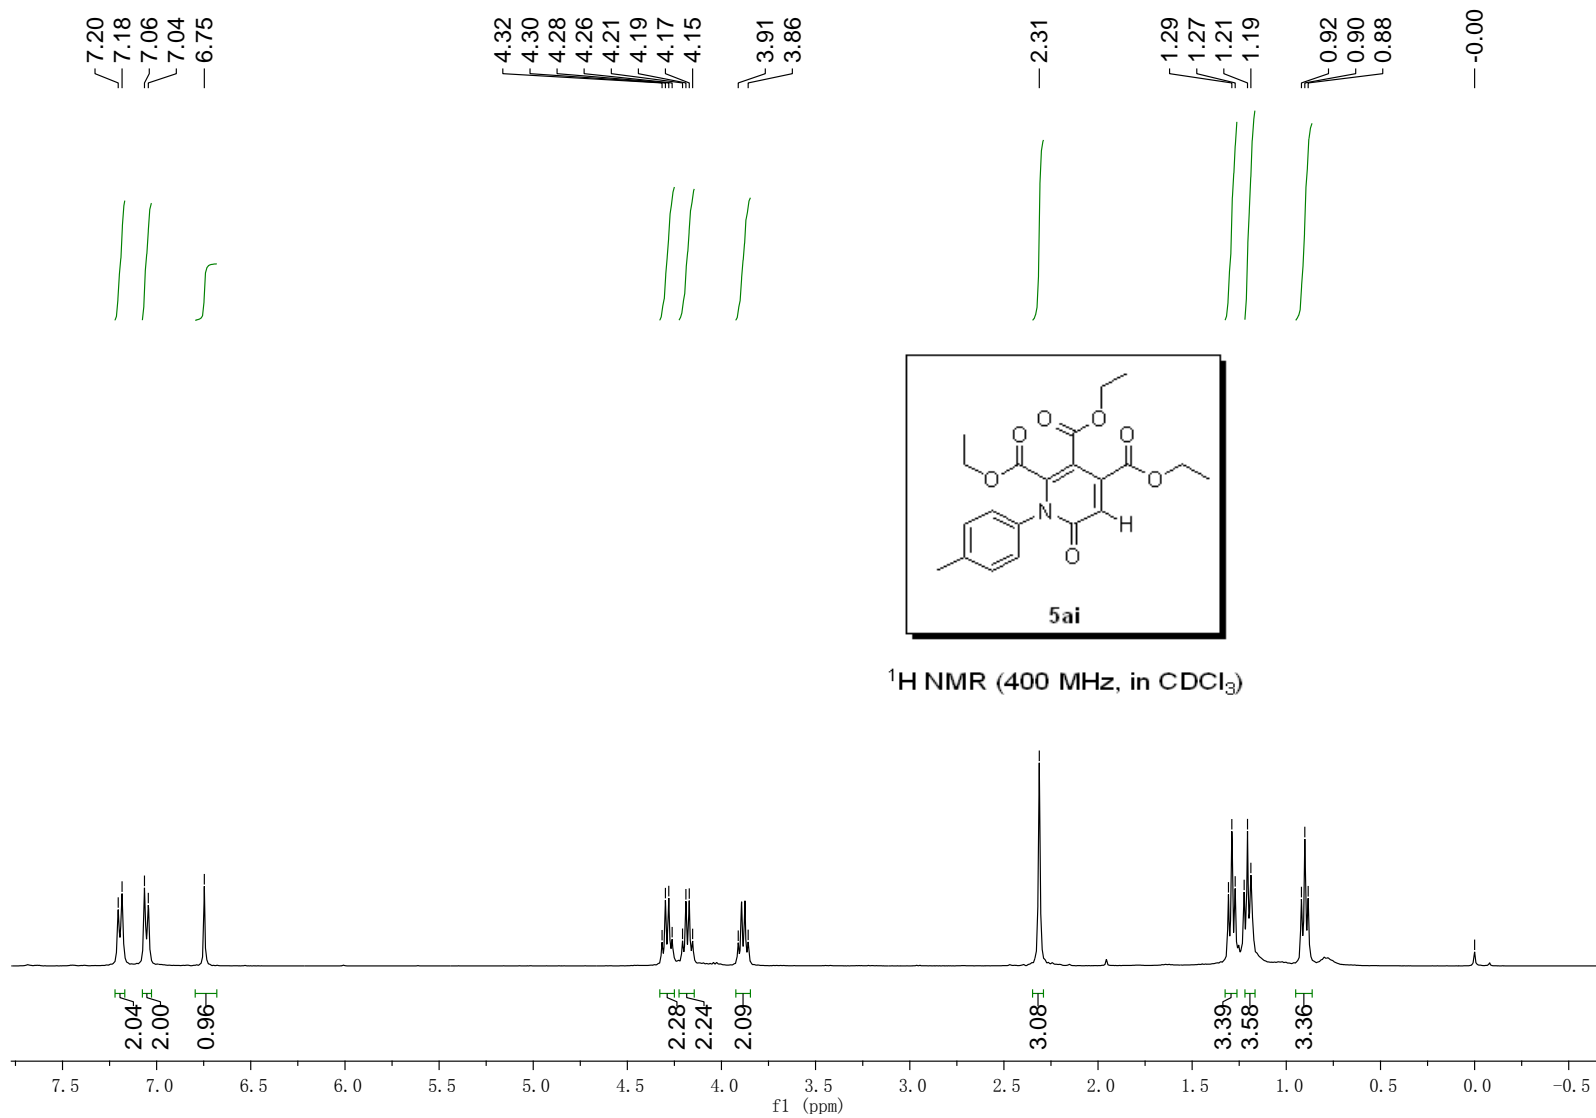

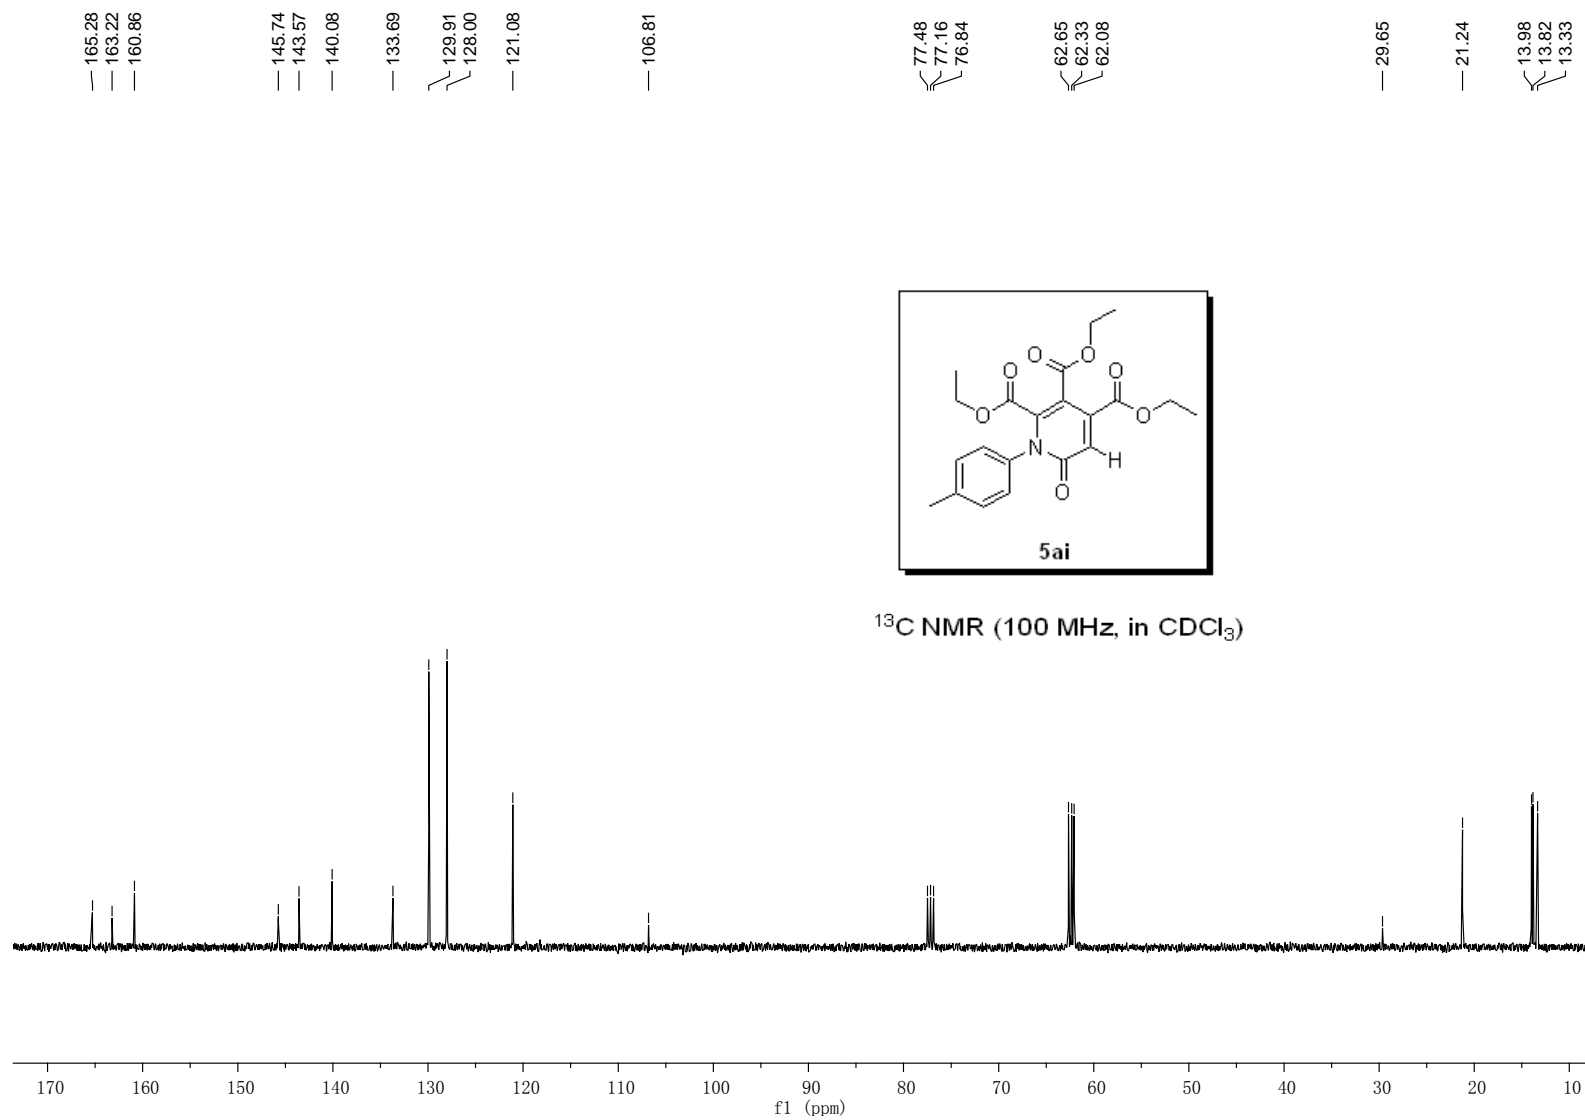

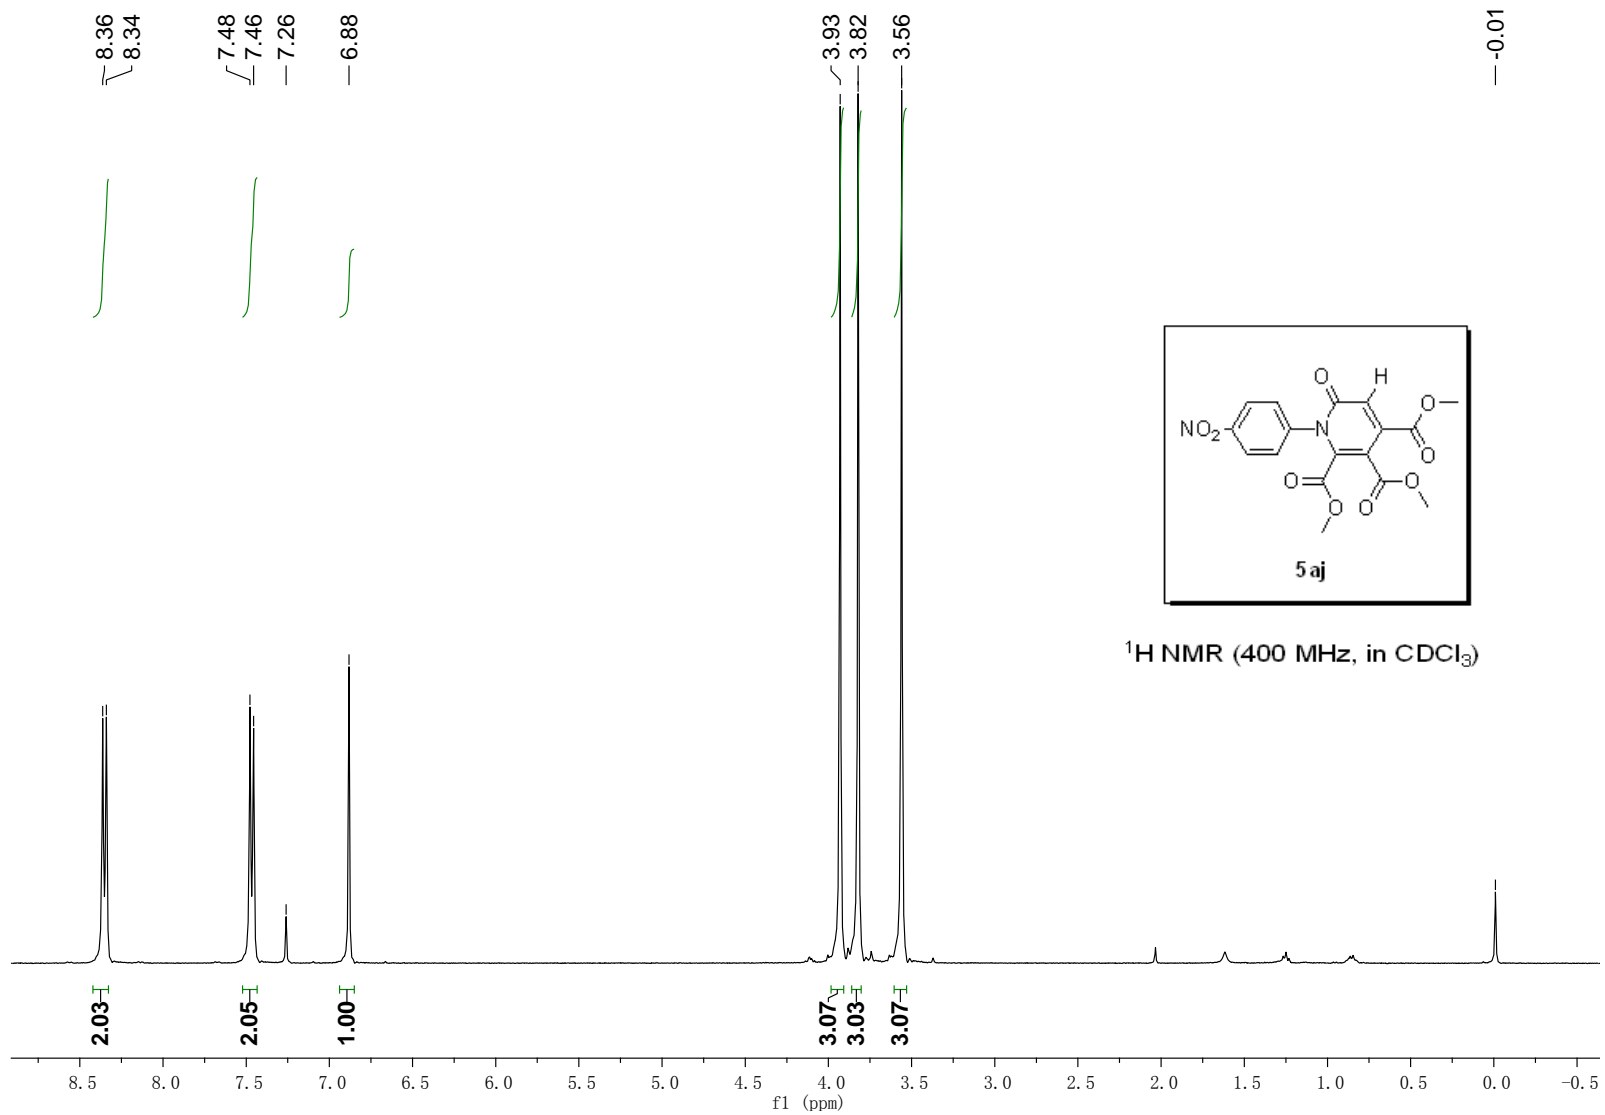

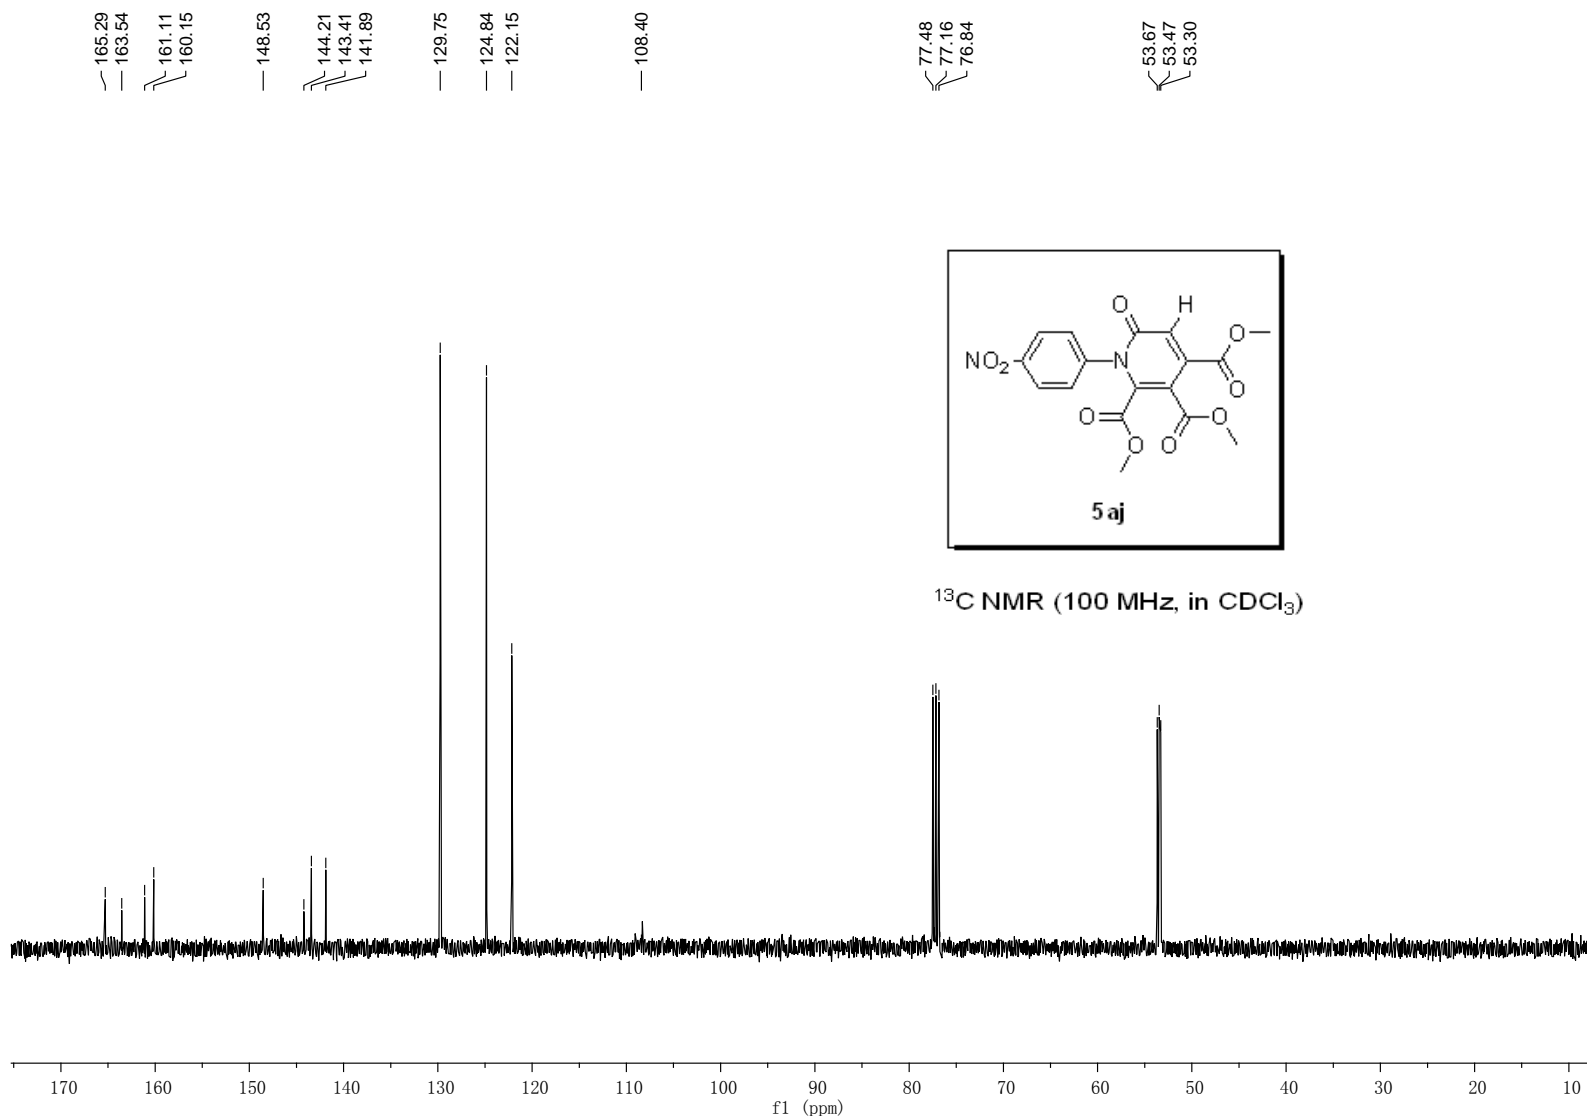

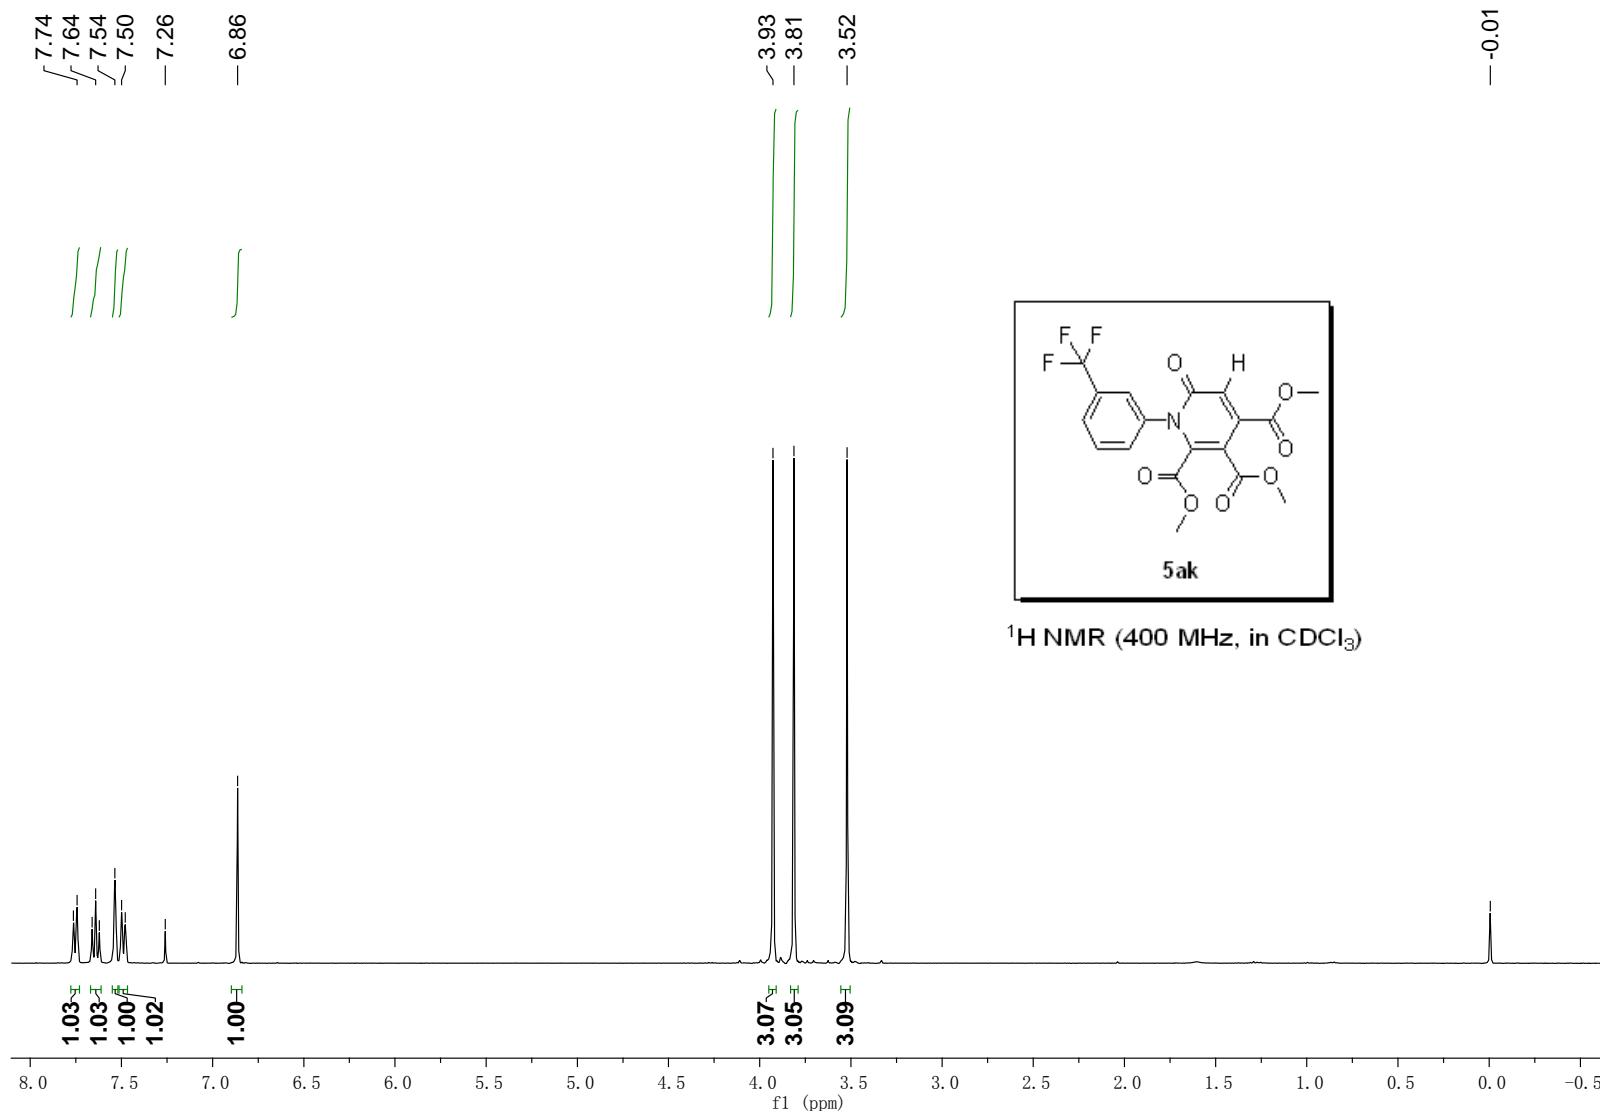

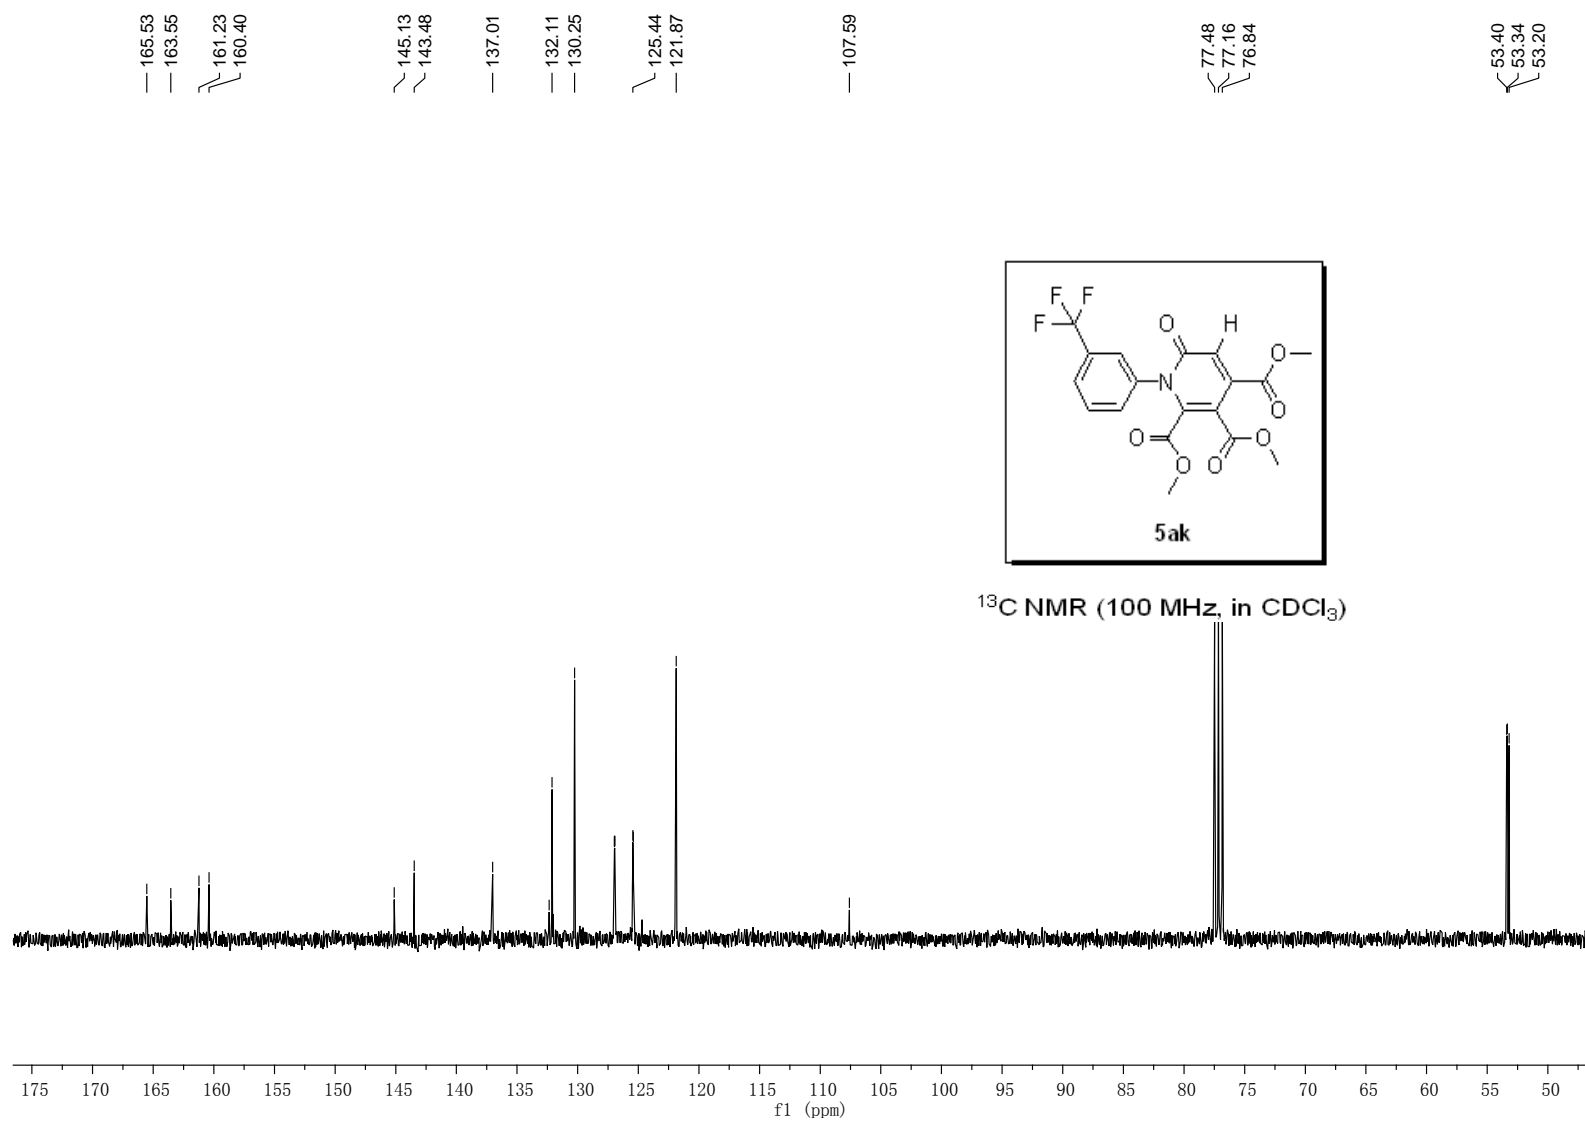

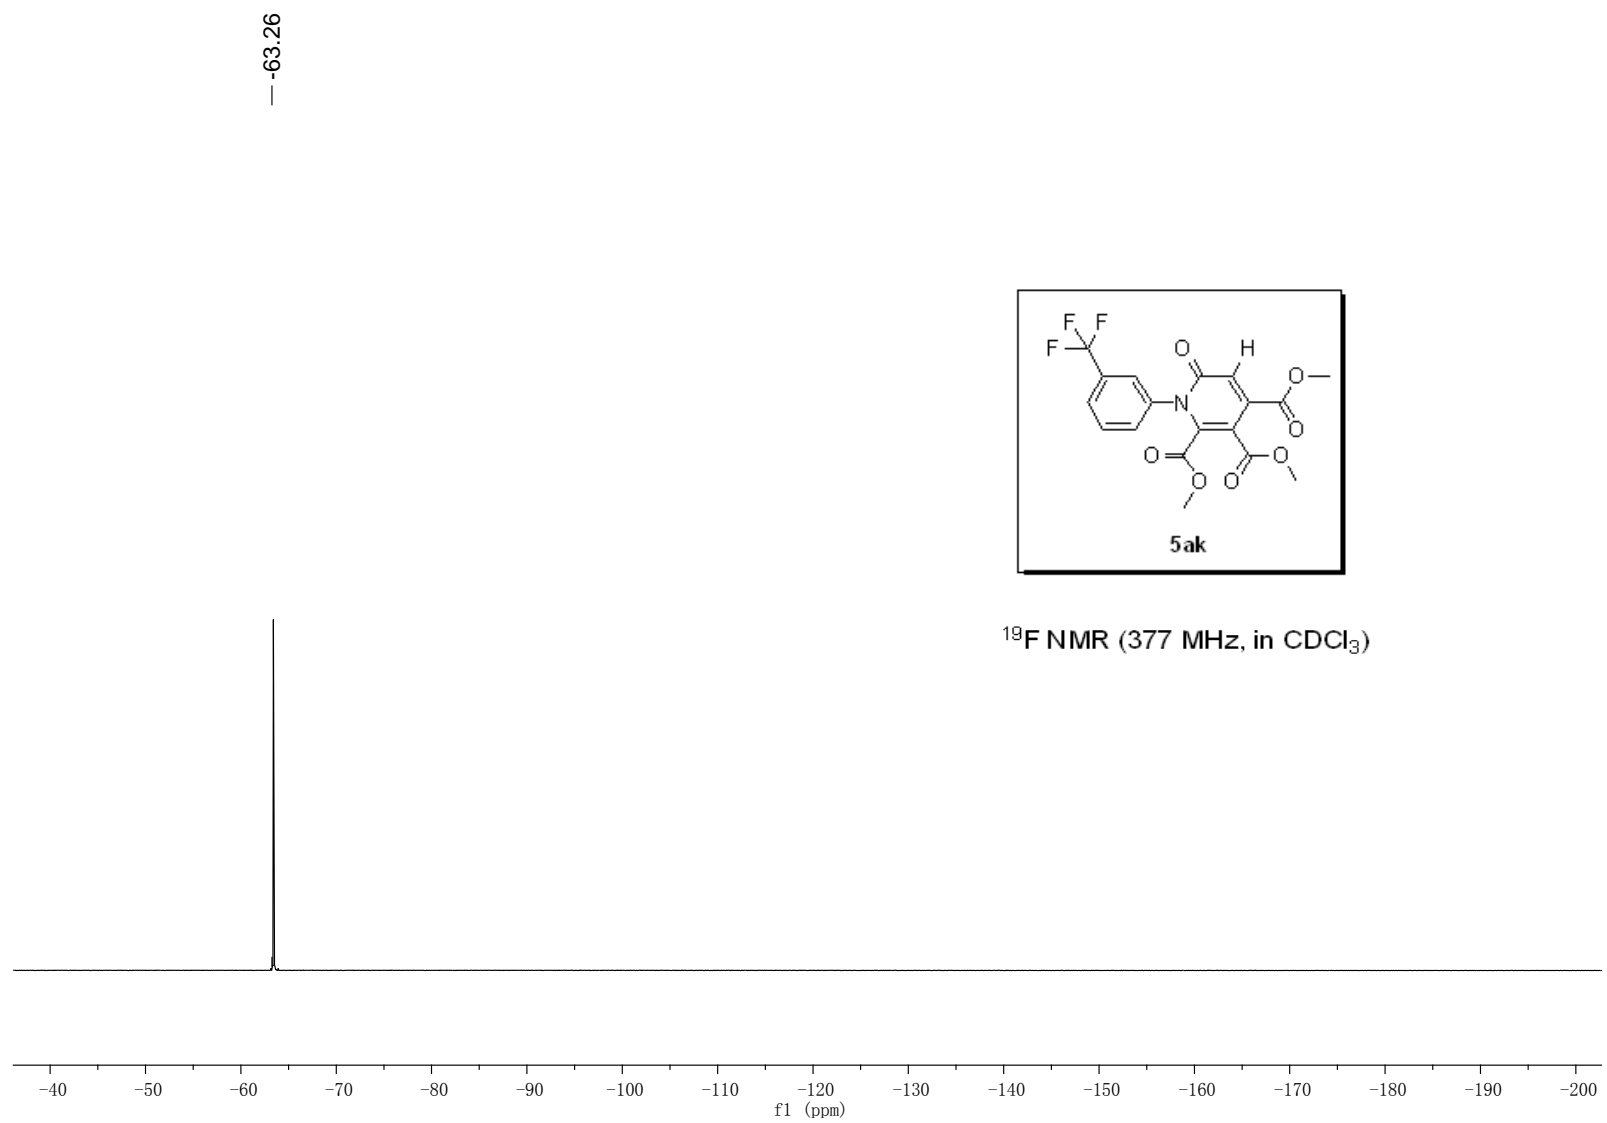



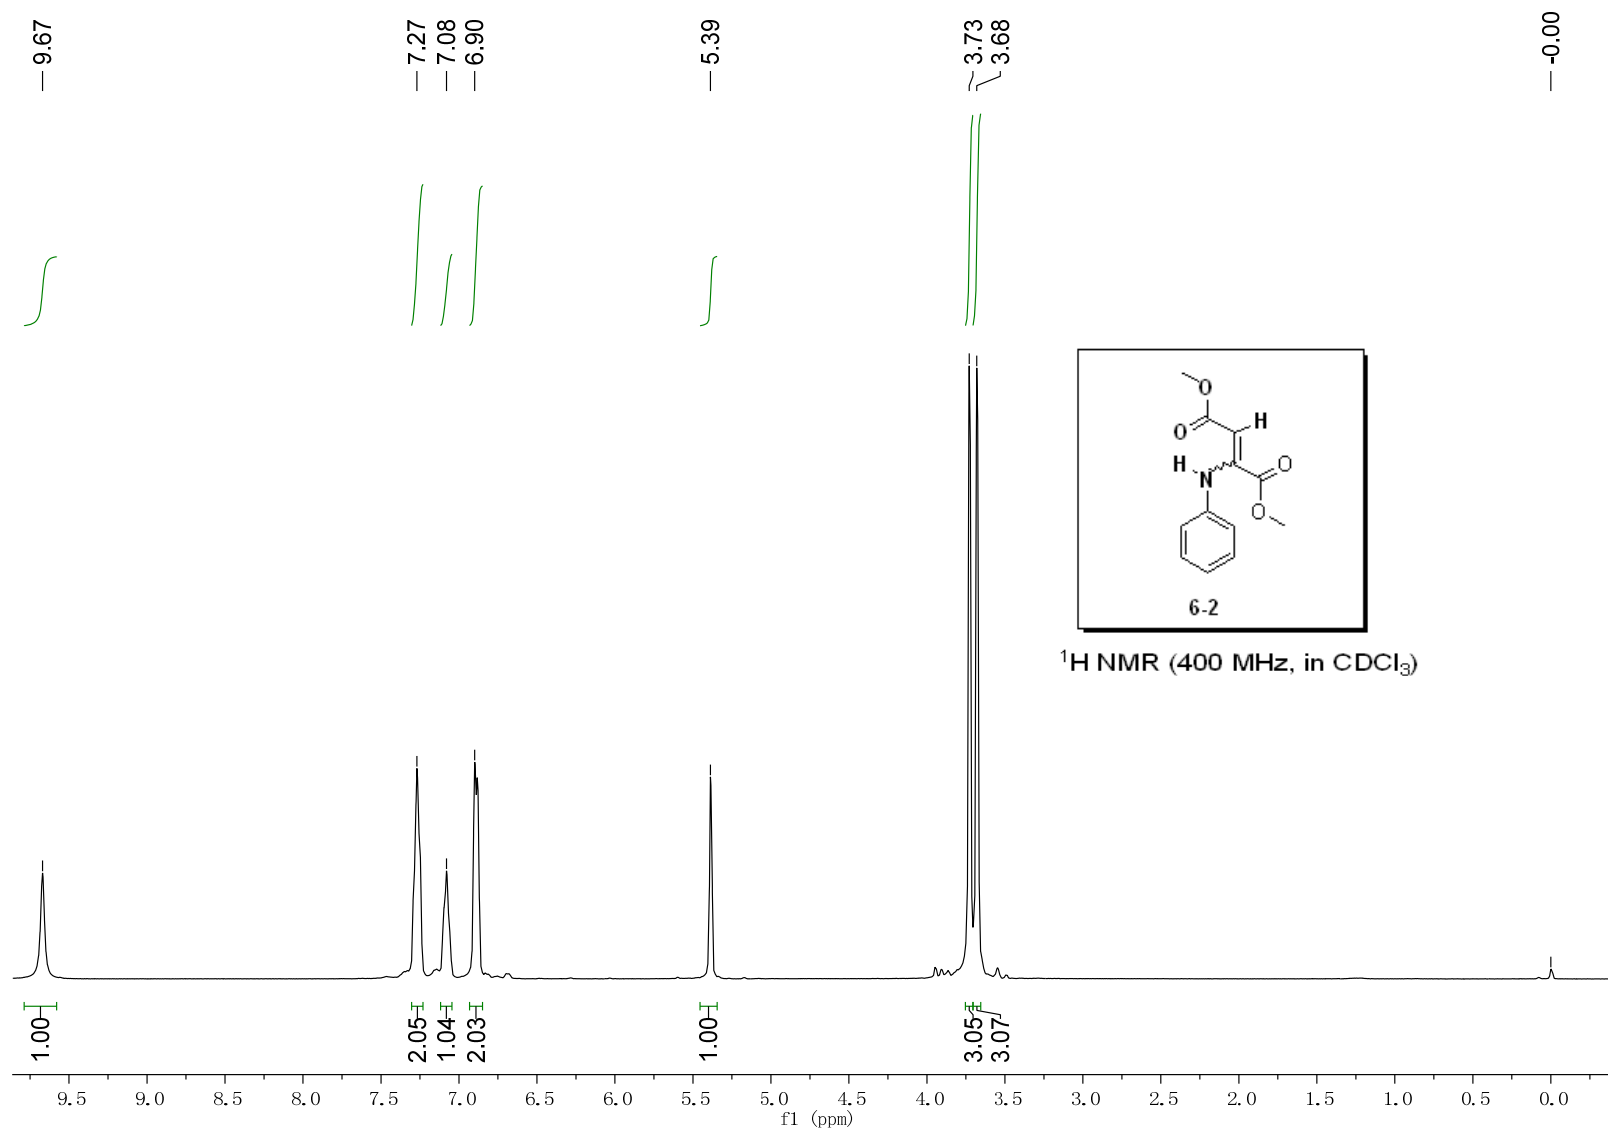

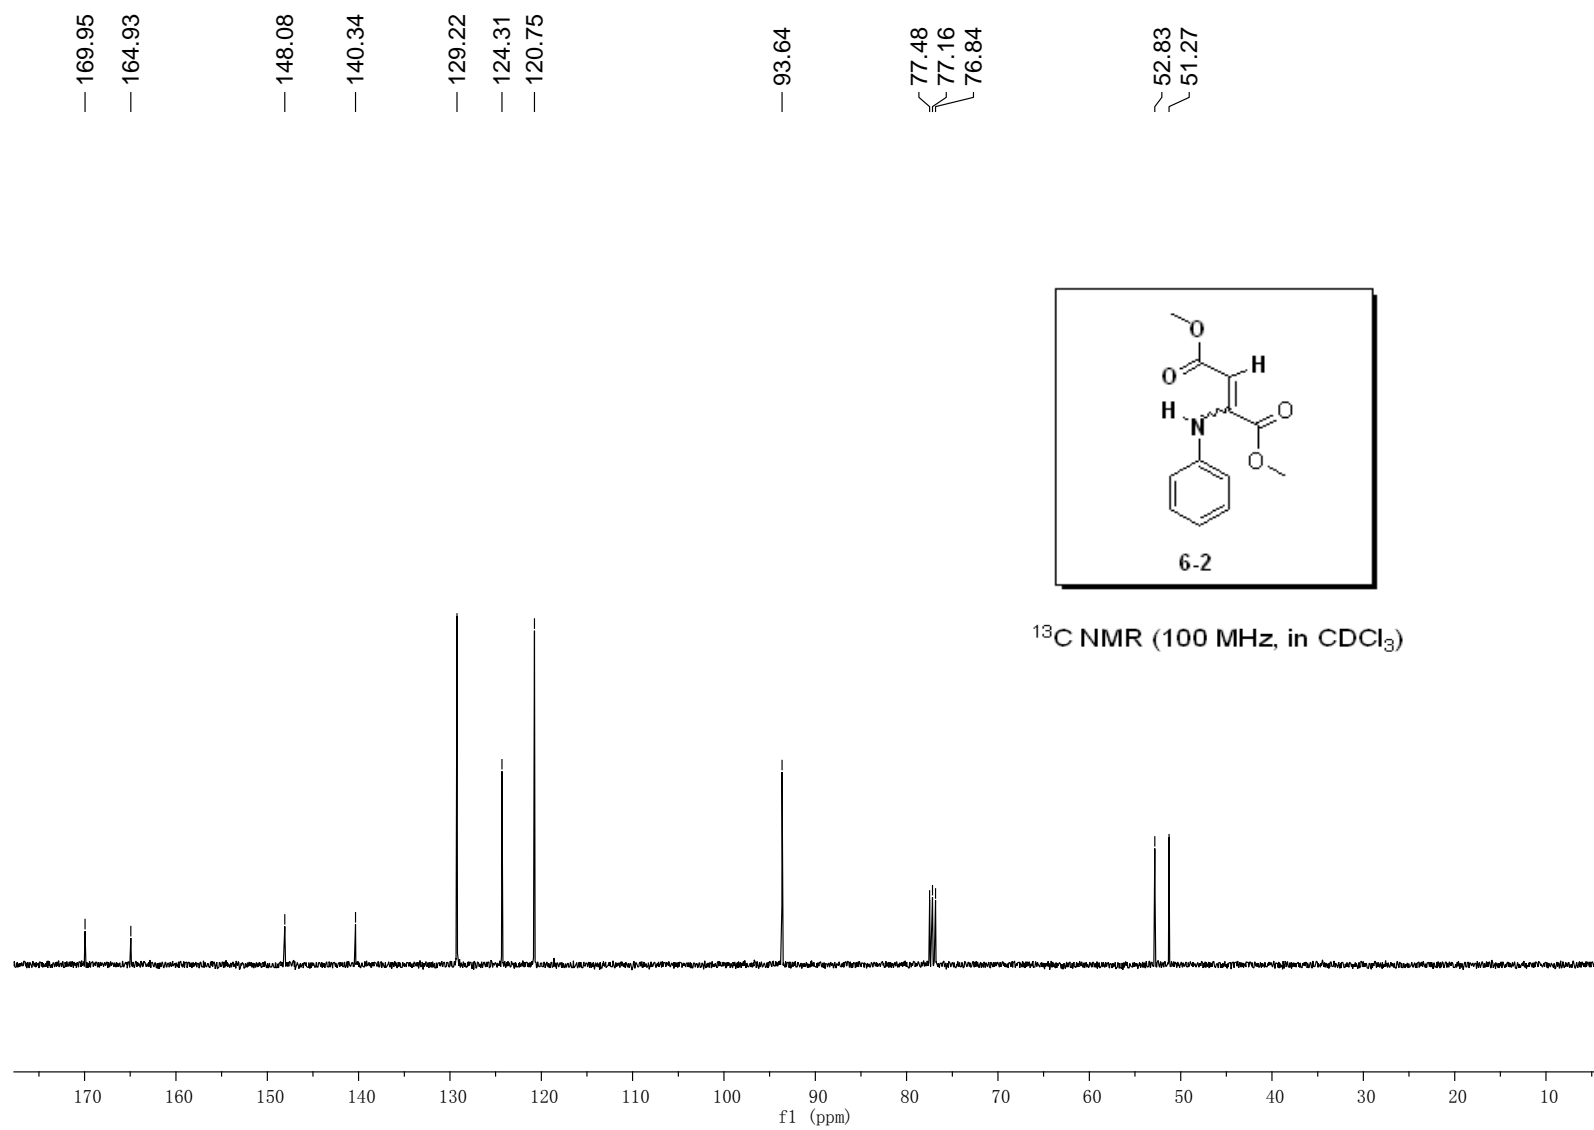

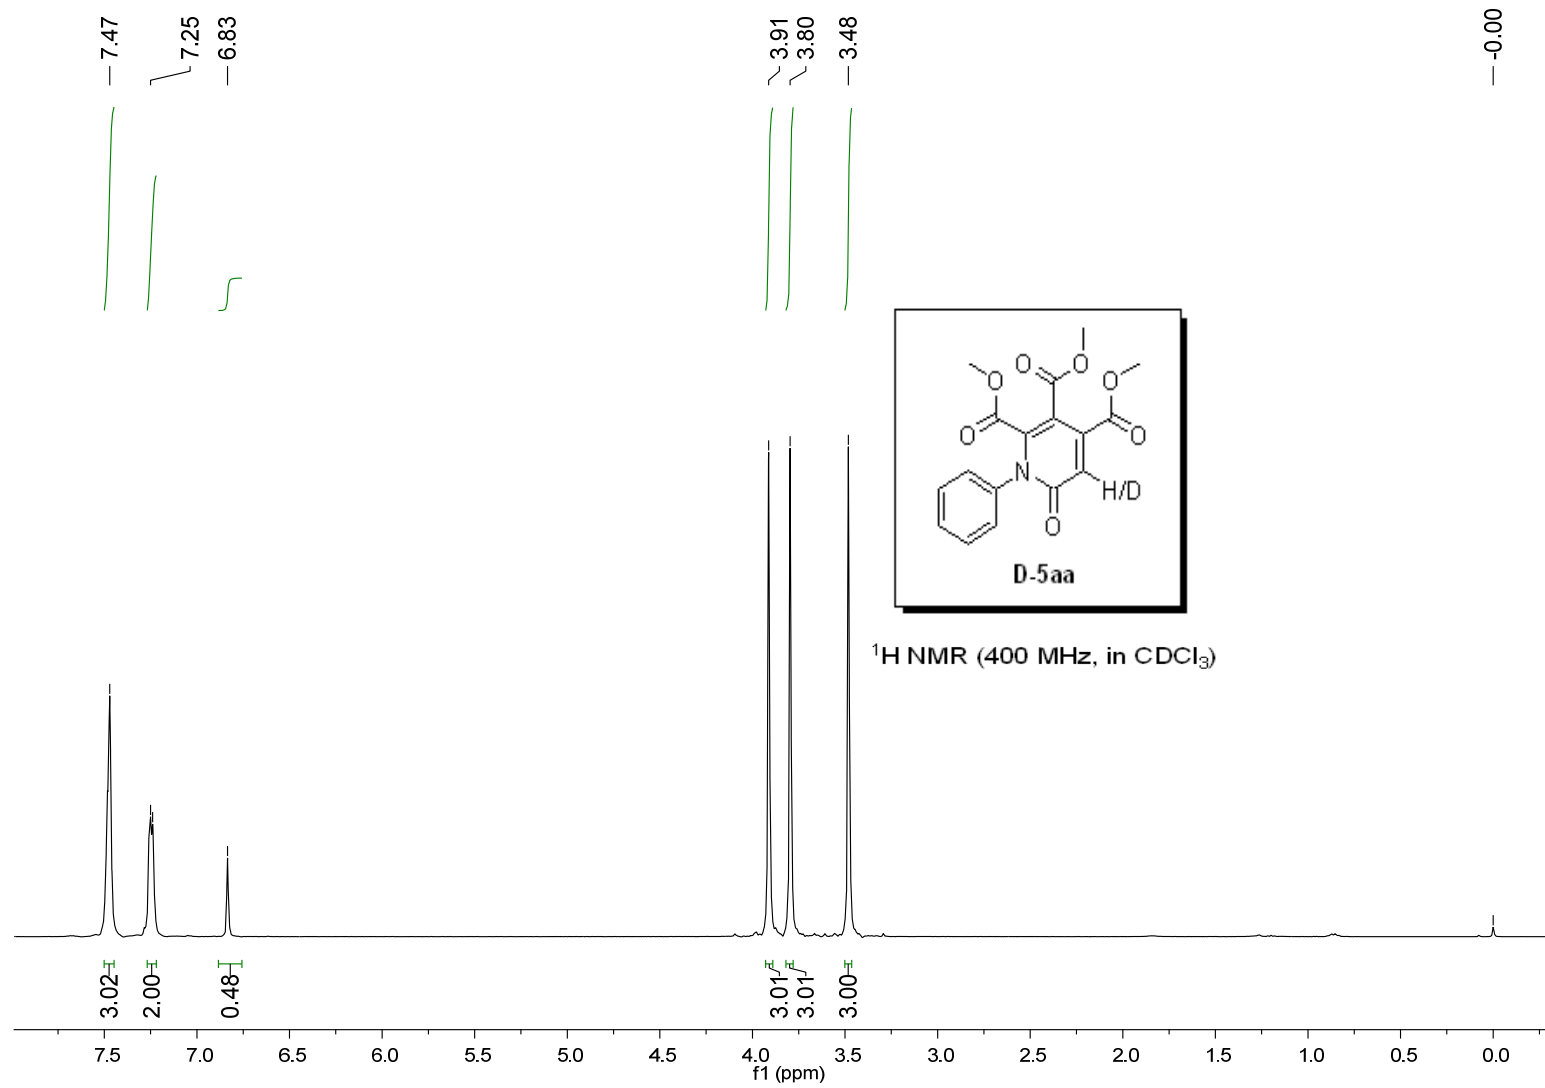

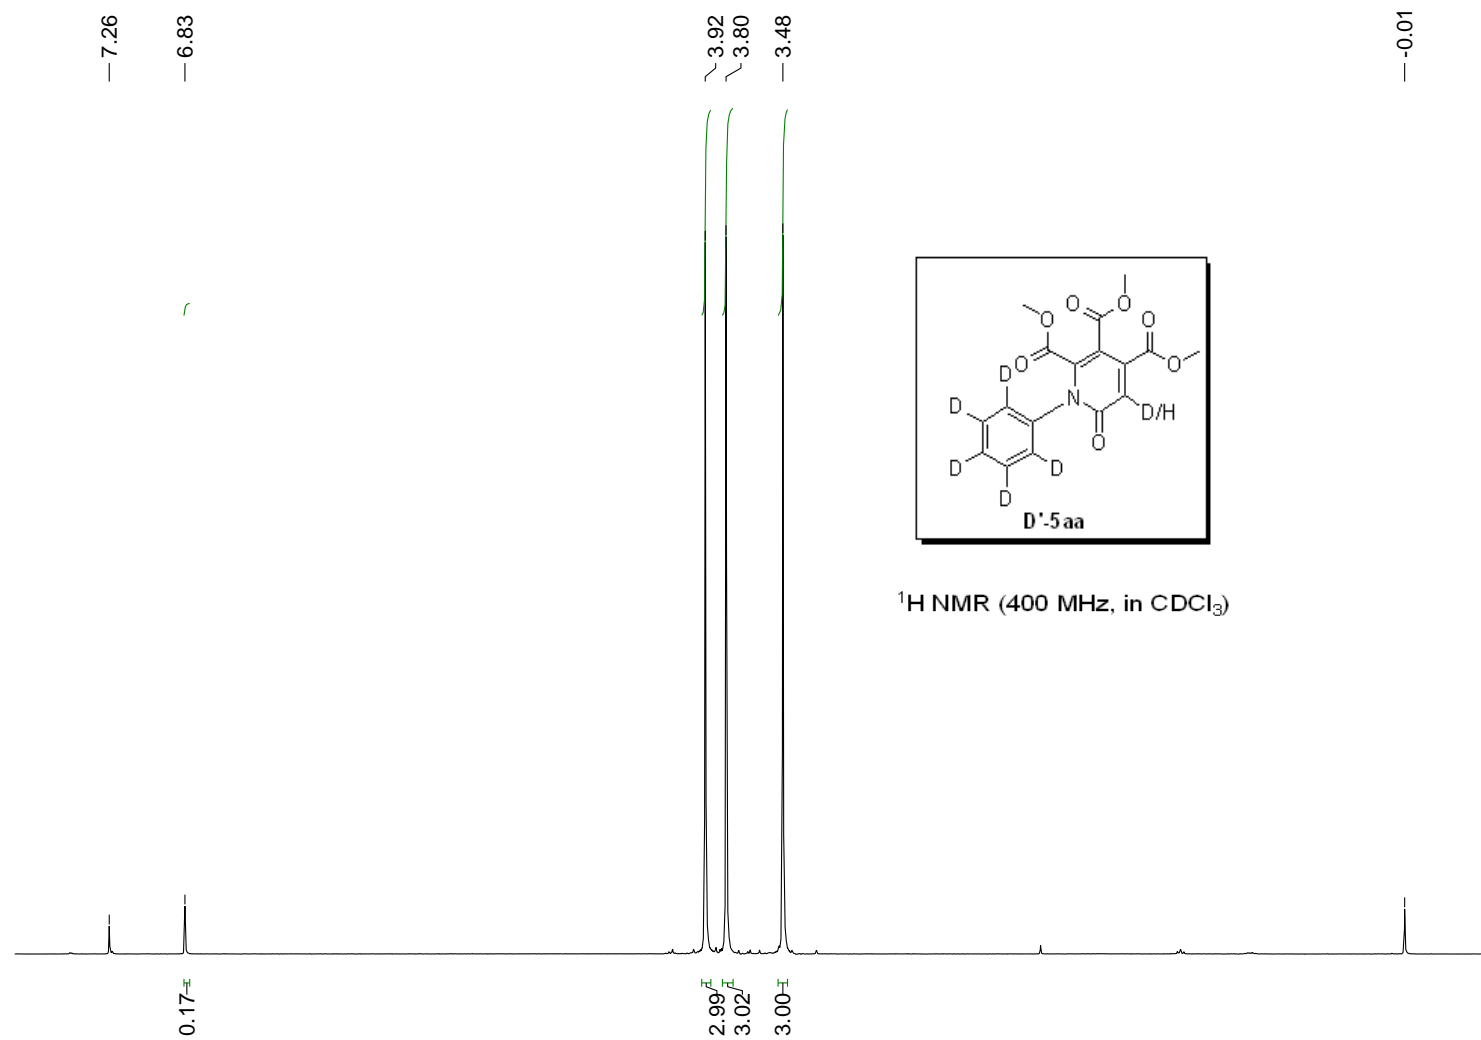

## Elemental Composition Report

Page 1

### Single Mass Analysis (displaying only valid results)

Tolerance = 5.0 PPM / DBE: min = -200.0, max = 200.0

Selected filters: None

Monoisotopic Mass, Even Electron Ions

13 formula(e) evaluated with 1 results within limits (all results (up to 1000) for each mass)

Elements Used:

C: 0-100 H: 0-150 N: 1-1 O: 5-5 Na: 1-1

4a

12092637 43 (1.113) AM (Top,4, Ar,5000.0,475.27,1.00,LS 10); Sm (Mn, 2x1.00); Sb (1,40.00); Cm (43:44)

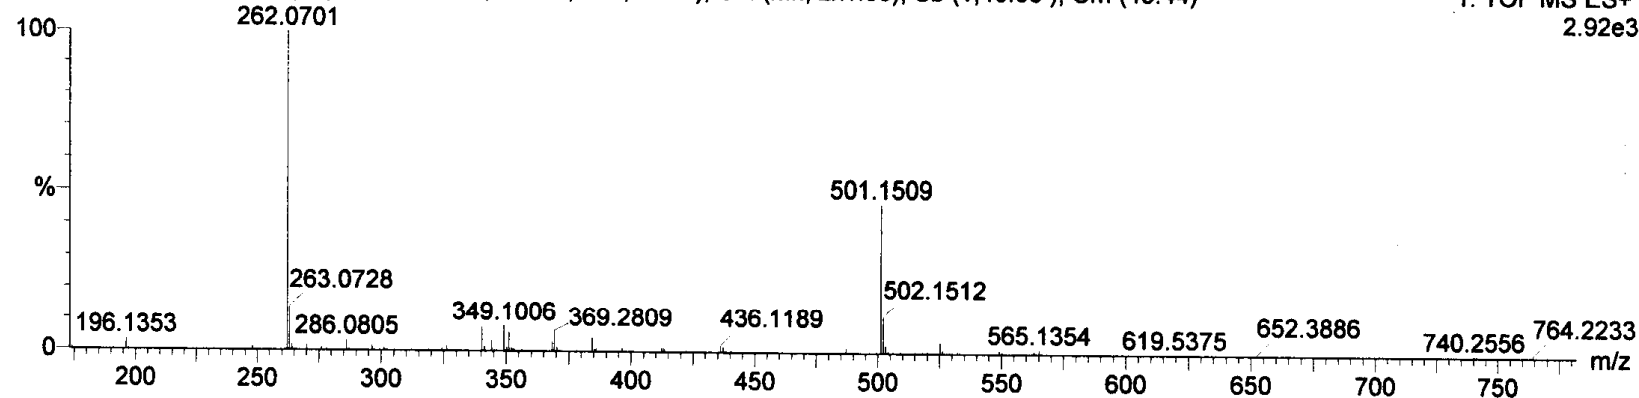

|          |            |     |     |        |       |                 |
|----------|------------|-----|-----|--------|-------|-----------------|
| Minimum: |            |     |     | -200.0 |       |                 |
| Maximum: |            | 5.0 | 5.0 | 200.0  |       |                 |
| Mass     | Calc. Mass | mDa | PPM | DBE    | i-FIT | Formula         |
| 262.0701 | 262.0691   | 1.0 | 3.8 | 5.5    | 1.2   | C11 H13 N O5 Na |

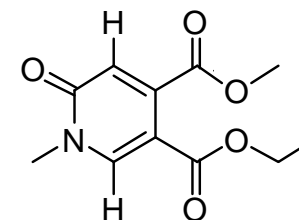

## Elemental Composition Report

Page 1

### Single Mass Analysis (displaying only valid results)

Tolerance = 5.0 PPM / DBE: min = -200.0, max = 200.0

Selected filters: None

Monoisotopic Mass, Even Electron Ions

13 formula(e) evaluated with 1 results within limits (all results (up to 1000) for each mass)

Elements Used:

C: 0-100 H: 0-150 N: 1-1 O: 5-5 Na: 1-1

4ab

12120303 66 (1.666) AM (Top,4, Ar,5000.0,475.27,1.00,LS 10); Sm (Mn, 2x1.00); Sb (1,40.00 ); Cm (66)

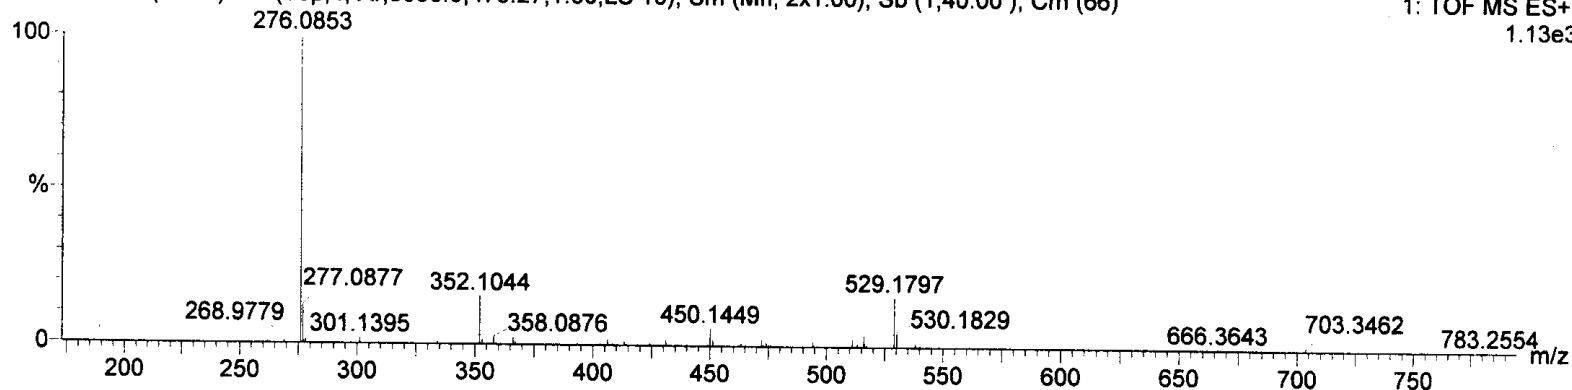

10:00:11  
1: TOF MS ES+  
1.13e3

Minimum: -200.0  
Maximum: 5.0 5.0 200.0

| Mass     | Calc. Mass | mDa | PPM | DBE | i-FIT | Formula         |
|----------|------------|-----|-----|-----|-------|-----------------|
| 276.0853 | 276.0848   | 0.5 | 1.8 | 5.5 | 4.0   | C12 H15 N O5 Na |

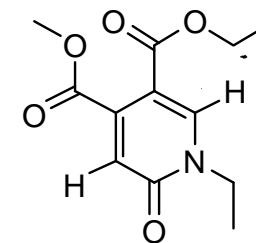

## Elemental Composition Report

### Single Mass Analysis (displaying only valid results)

Tolerance = 50.0 PPM / DBE: min = -200.0, max = 200.0

Selected filters: None

Monoisotopic Mass, Even Electron Ions

13 formula(e) evaluated with 1 results within limits (all results (up to 1000) for each mass)

Elements Used:

C: 0-100 H: 0-150 N: 1-1 O: 5-5 Na: 1-1

4ac

12092638 54 (1.365) AM (Top,4, Ar,5000.0,475.27,1.00,LS 10); Sm (Mn, 2x1.00); Sb (1,40.00); Cm (54)

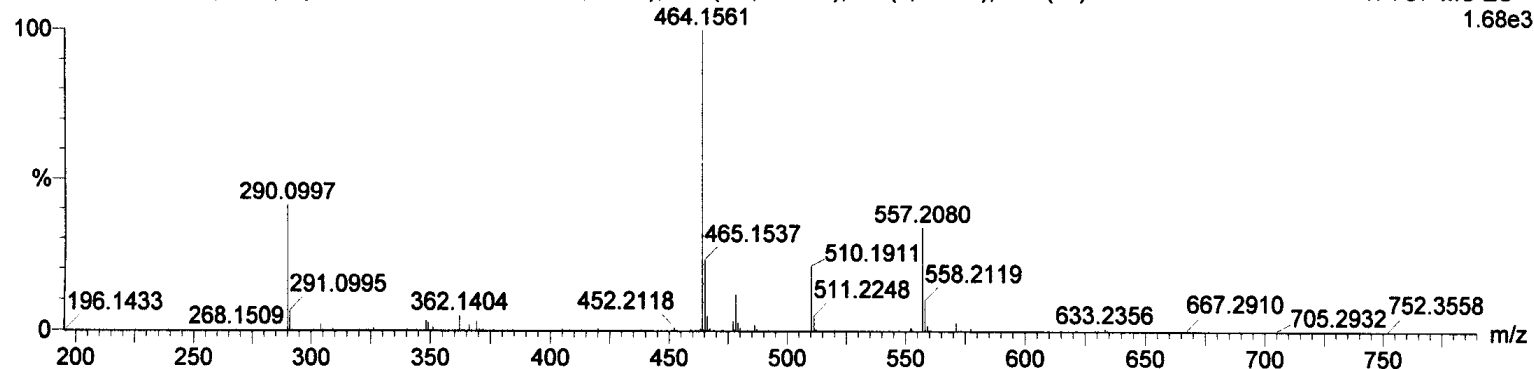

Minimum: -200.0  
Maximum: 5.0 50.0 200.0

| Mass     | Calc. Mass | mDa  | PPM  | DBE | i-FIT | Formula         |
|----------|------------|------|------|-----|-------|-----------------|
| 290.0997 | 290.1004   | -0.7 | -2.4 | 5.5 | 8.5   | C13 H17 N O5 Na |

Page 1

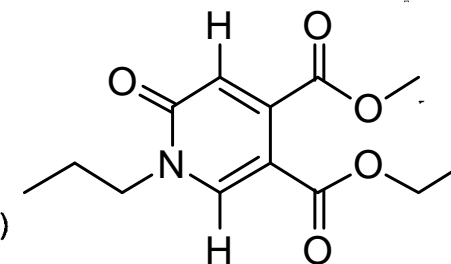

16:26:27  
1: TOF MS ES+  
1.68e3

## Elemental Composition Report

### Single Mass Analysis (displaying only valid results)

Tolerance = 5.0 PPM / DBE: min = -200.0, max = 200.0

Selected filters: None

Monoisotopic Mass, Even Electron Ions

13 formula(e) evaluated with 1 results within limits (all results (up to 1000) for each mass)

Elements Used:

C: 0-100 H: 0-150 N: 1-1 O: 5-5 Na: 1-1

4ad

12092639 31 (0.810) AM (Top,4, Ar,5000.0,475.27,1.00,LS 10); Sm (Mn, 2x1.00); Sb (1,40.00); Cm (31:32)

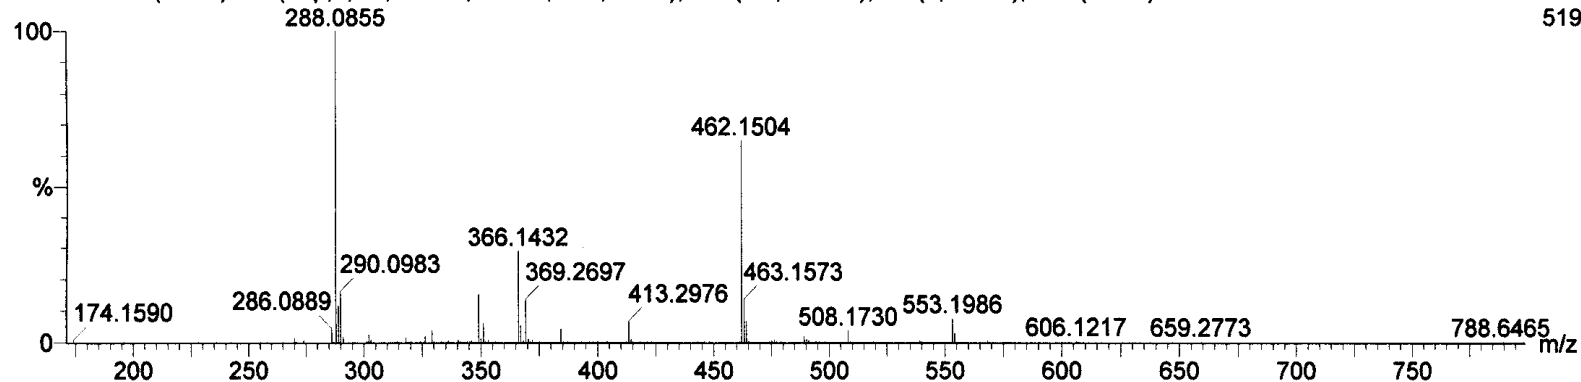

Minimum: -200.0

Maximum: 5.0 5.0 200.0

| Mass     | Calc. Mass | mDa | PPM | DBE | i-FIT | Formula         |
|----------|------------|-----|-----|-----|-------|-----------------|
| 288.0855 | 288.0848   | 0.7 | 2.4 | 6.5 | 34.7  | C13 H15 N O5 Na |

Page 1

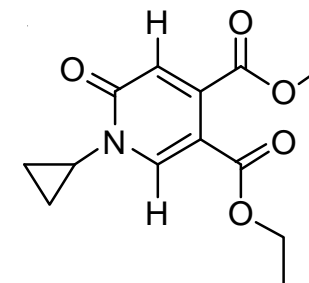

16:41:50  
1: TOF MS ES+  
519



## Elemental Composition Report

Page 1

### Single Mass Analysis (displaying only valid results)

Tolerance = 50.0 PPM / DBE: min = -200.0, max = 200.0

Selected filters: None

Monoisotopic Mass, Even Electron Ions

13 formula(e) evaluated with 1 results within limits (all results (up to 1000) for each mass)

Elements Used:

C: 0-100 H: 0-150 N: 1-1 O: 5-5 Na: 1-1

4ae

12120305 58 (1.476) AM (Top,4, Ar,5000.0,475.27,1.00,LS 10); Sm (Mn, 2x1.00); Sb (1,40.00); Cm (57:64)

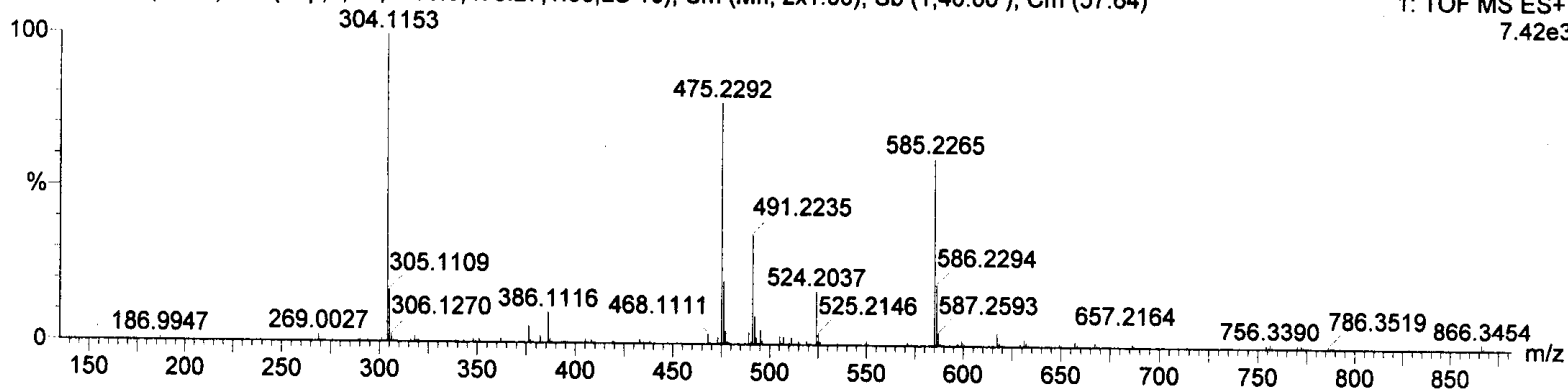

10:16:24  
1: TOF MS ES+  
7.42e3

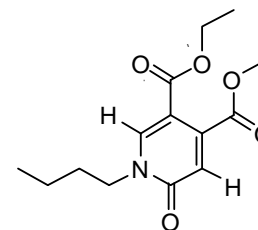

|          |            |      |      |        |       |                 |
|----------|------------|------|------|--------|-------|-----------------|
| Minimum: |            |      |      | -200.0 |       |                 |
| Maximum: |            | 5.0  | 50.0 | 200.0  |       |                 |
| Mass     | Calc. Mass | mDa  | PPM  | DBE    | i-FIT | Formula         |
| 304.1153 | 304.1161   | -0.8 | -2.6 | 5.5    | 6.2   | C14 H19 N O5 Na |

## Elemental Composition Report

Page 1

### Single Mass Analysis (displaying only valid results)

Tolerance = 5.0 PPM / DBE: min = -200.0, max = 200.0

Selected filters: None

Monoisotopic Mass, Even Electron Ions

12 formula(e) evaluated with 1 results within limits (all results (up to 1000) for each mass)

Elements Used:

C: 0-100 H: 0-150 N: 1-1 O: 5-5 Na: 1-1

4a

12092640 26 (0.675) AM (Top,4, Ar,5000.0,475.27,1.00,LS 10); Sm (Mn, 2x1.00); Sb (1,40.00 ); Cm (26)

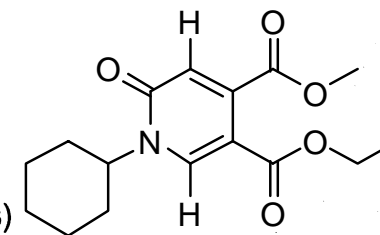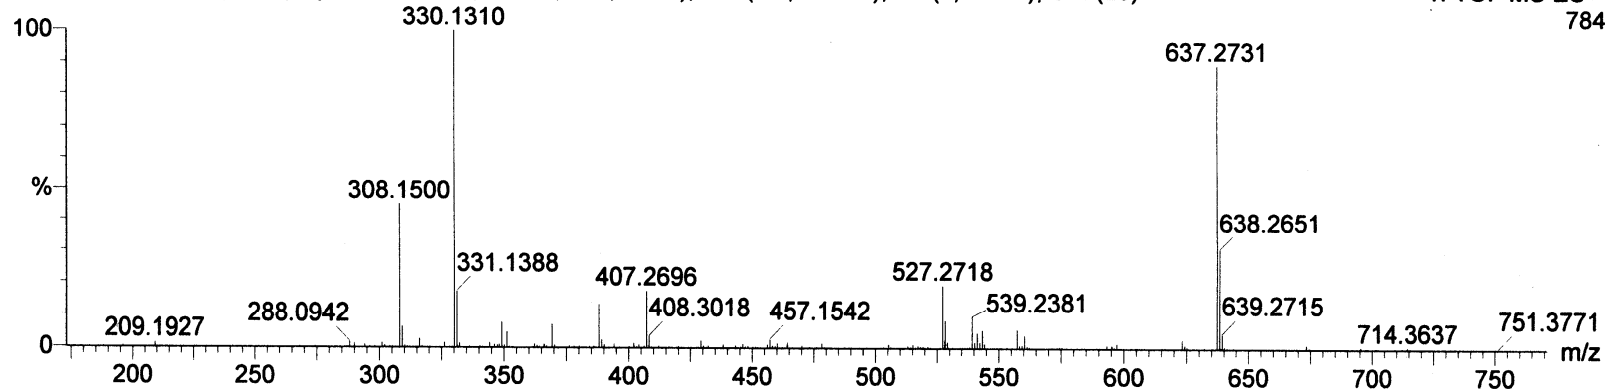

Minimum: -200.0  
Maximum: 5.0 5.0 200.0

| Mass     | Calc. Mass | mDa  | PPM  | DBE | i-FIT | Formula         |
|----------|------------|------|------|-----|-------|-----------------|
| 330.1310 | 330.1317   | -0.7 | -2.1 | 6.5 | 7.9   | C16 H21 N O5 Na |

## Elemental Composition Report

Page 1

### Single Mass Analysis (displaying only valid results)

Tolerance = 50.0 PPM / DBE: min = -200.0, max = 200.0

Selected filters: None

Monoisotopic Mass, Even Electron Ions

13 formula(e) evaluated with 1 results within limits (all results (up to 1000) for each mass)

Elements Used:

C: 0-100 H: 0-150 N: 1-1 O: 5-5 F: 1-1 Na: 1-1

4 a g

12120306 53 (1.338) AM (Top,4, Ar,5000.0,475.27,1.00,LS 10); Sm (Mn, 2x1.00); Sb (1,40.00); Cm (52:78)

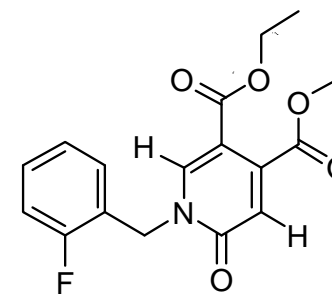

10:23:04  
 1: TOF MS ES+  
 3.43e4

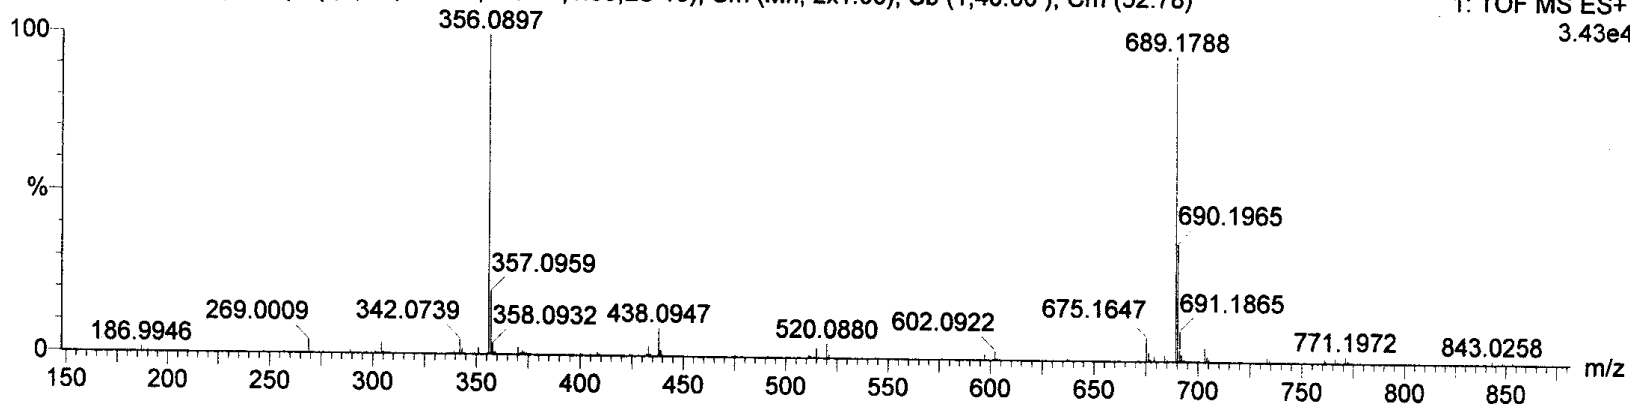

Minimum: -200.0  
 Maximum: 5.0 50.0 200.0

| Mass     | Calc. Mass | mDa  | PPM  | DBE | i-FIT | Formula           |
|----------|------------|------|------|-----|-------|-------------------|
| 356.0897 | 356.0910   | -1.3 | -3.7 | 9.5 | 14.3  | C17 H16 N O5 F Na |

## Elemental Composition Report

Page 1

### Single Mass Analysis (displaying only valid results)

Tolerance = 5.0 PPM / DBE: min = -200.0, max = 200.0

Selected filters: None

Monoisotopic Mass, Even Electron Ions

13 formula(e) evaluated with 1 results within limits (all results (up to 1000) for each mass)

Elements Used:

C: 0-100 H: 0-150 N: 1-1 O: 5-5 Na: 1-1 Cl: 1-1

4a<sub>h</sub>

12092641 35 (0.881) AM (Top,4, Ar,5000.0,475.27,1.00,LS 10); Sm (Mn, 2x1.00); Sb (1,40.00); Cm (35:38)

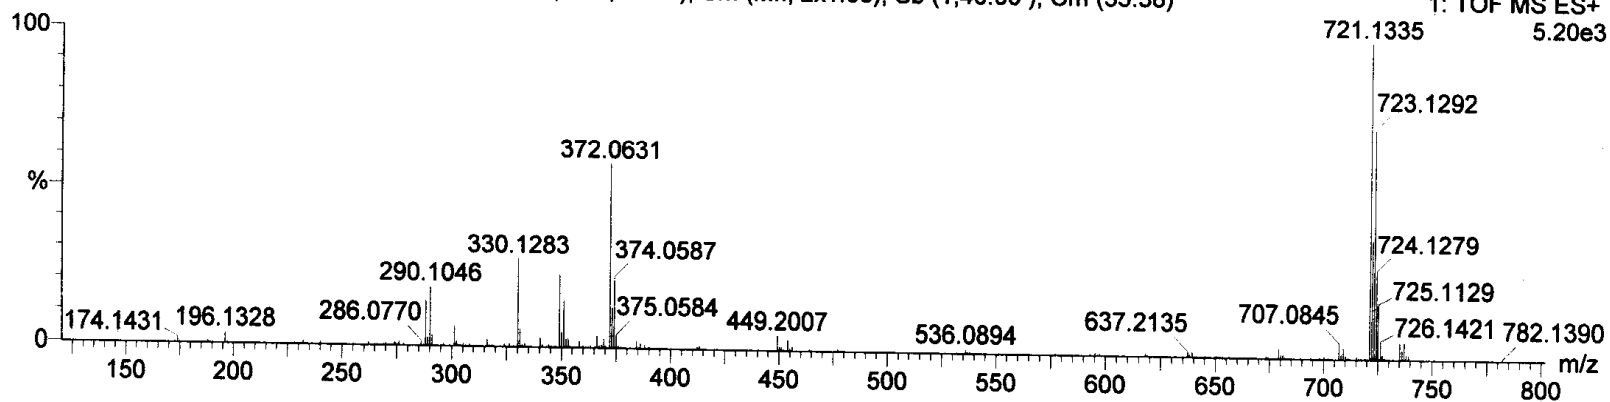

Minimum: -200.0  
Maximum: 5.0 5.0 200.0

| Mass     | Calc. Mass | mDa | PPM | DBE | i-FIT | Formula            |
|----------|------------|-----|-----|-----|-------|--------------------|
| 372.0631 | 372.0615   | 1.6 | 4.3 | 9.5 | 2.1   | C17 H16 N O5 Na Cl |

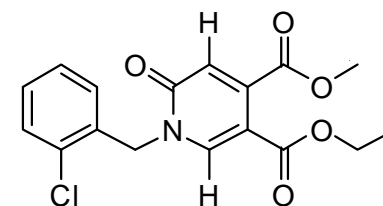

## Elemental Composition Report

Page 1

### Single Mass Analysis (displaying only valid results)

Tolerance = 5.0 PPM / DBE: min = -200.0, max = 200.0

Selected filters: None

Monoisotopic Mass, Even Electron Ions

13 formula(e) evaluated with 1 results within limits (all results (up to 1000) for each mass)

Elements Used:

C: 0-100 H: 0-150 N: 1-1 O: 5-5 Na: 1-1 Cl: 1-1

4a

12092642 12 (0.289) AM (Top,4, Ar,5000.0,475.27,1.00,LS 10); Sm (Mn, 2x1.00); Sb (1,40.00 ); Cm (12:13)

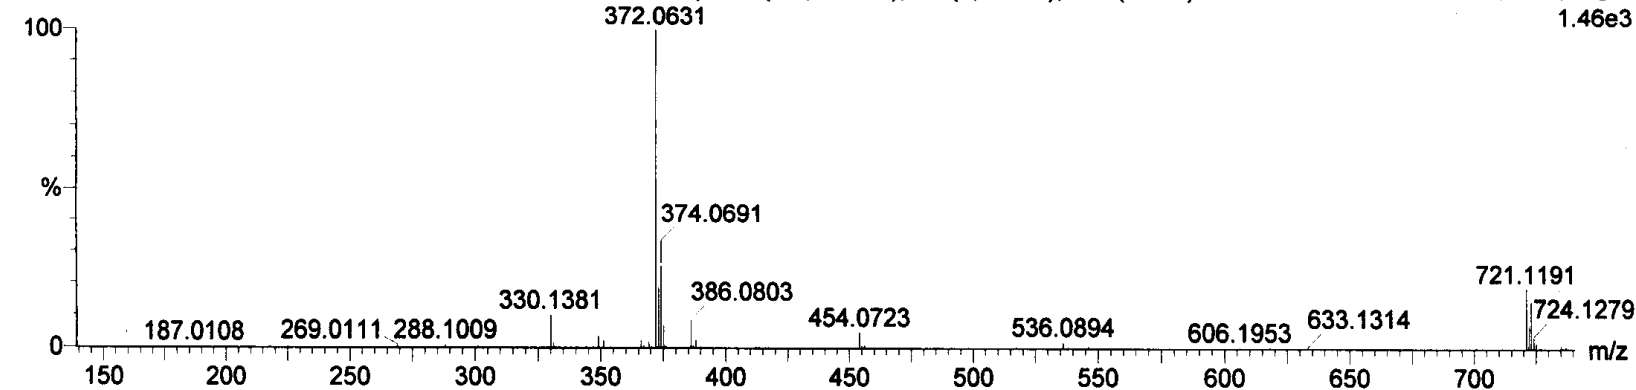

Minimum: -200.0  
Maximum: 5.0 5.0 200.0

| Mass     | Calc. Mass | mDa | PPM | DBE | i-FIT | Formula            |
|----------|------------|-----|-----|-----|-------|--------------------|
| 372.0631 | 372.0615   | 1.6 | 4.3 | 9.5 | 2.1   | C17 H16 N O5 Na Cl |

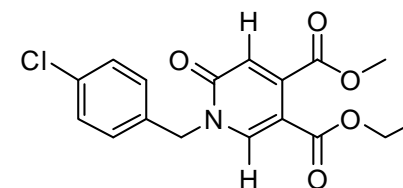

17:19:26  
1: TOF MS ES+  
1.46e3

## Elemental Composition Report

Page 1

### Single Mass Analysis (displaying only valid results)

Tolerance = 5.0 PPM / DBE: min = -200.0, max = 200.0

Selected filters: None

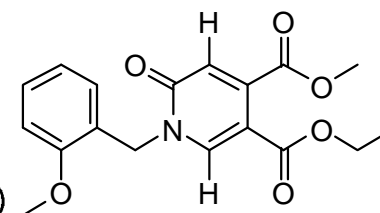

Monoisotopic Mass, Even Electron Ions

13 formula(e) evaluated with 1 results within limits (all results (up to 1000) for each mass)

Elements Used:

C: 0-100 H: 0-150 N: 1-1 O: 6-6 Na: 1-1

4a)

12092643 56 (1.450) AM (Top,4, Ar,5000.0,475.27,1.00,LS 10); Sm (Mn, 2x1.00); Sb (1,40.00); Cm (55:56)

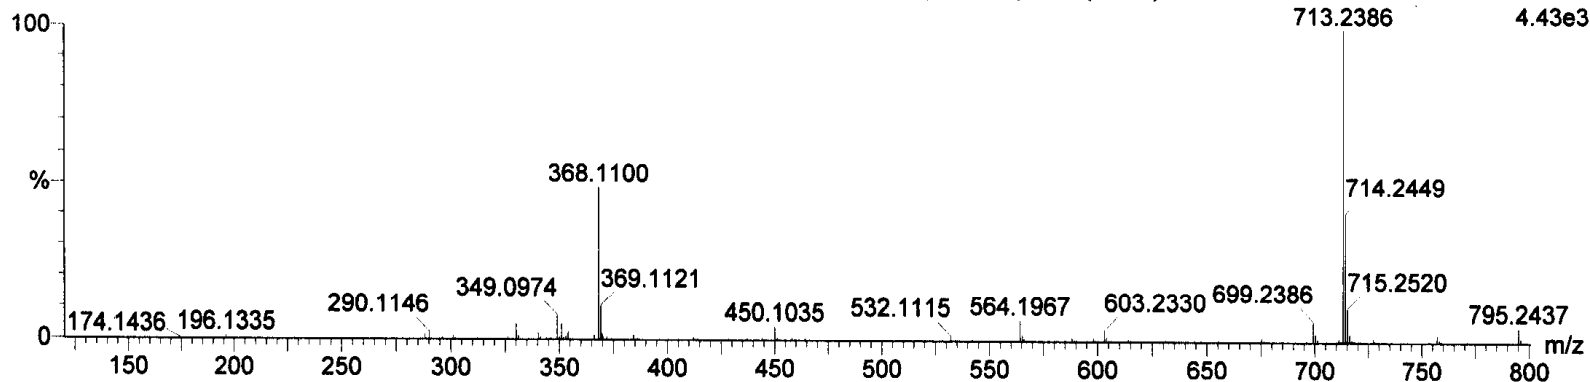

Minimum: -200.0  
Maximum: 5.0 5.0 200.0

| Mass     | Calc. Mass | mDa  | PPM  | DBE | i-FIT | Formula         |
|----------|------------|------|------|-----|-------|-----------------|
| 368.1100 | 368.1110   | -1.0 | -2.7 | 9.5 | 1.3   | C18 H19 N O6 Na |

## Elemental Composition Report

Page 1

### Single Mass Analysis (displaying only valid results)

Tolerance = 5.0 PPM / DBE: min = -200.0, max = 200.0

Selected filters: None

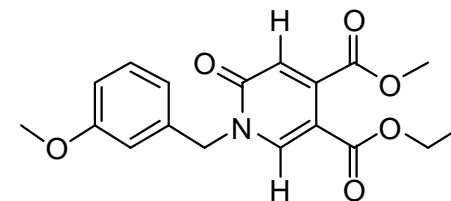

Monoisotopic Mass, Even Electron Ions

13 formula(e) evaluated with 1 results within limits (all results (up to 1000) for each mass)

Elements Used:

C: 0-100 H: 0-150 N: 1-1 O: 6-6 Na: 1-1

4aK

12092644 48 (1.205) AM (Top,4, Ar,5000.0,475.27,1.00,LS 10); Sm (Mn, 2x1.00); Sb (1,40.00); Cm (48:49)

17:35:45  
1: TOF MS ES+  
1.90e3

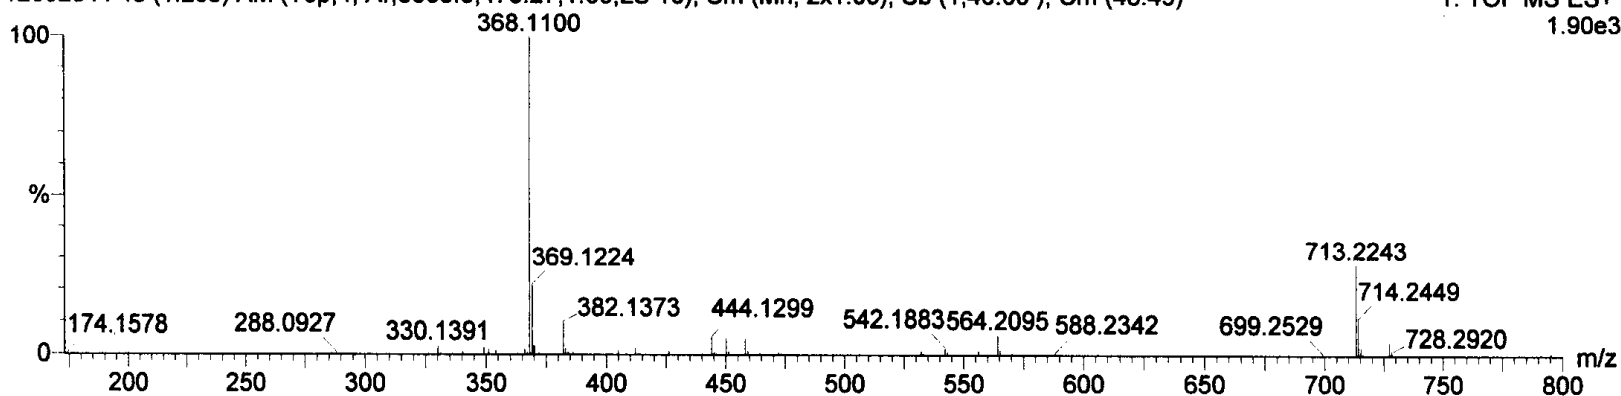

Minimum: -200.0  
Maximum: 5.0 5.0 200.0

| Mass     | Calc. Mass | mDa  | PPM  | DBE | i-FIT | Formula         |
|----------|------------|------|------|-----|-------|-----------------|
| 368.1100 | 368.1110   | -1.0 | -2.7 | 9.5 | 2.4   | C18 H19 N O6 Na |

## Elemental Composition Report

Page 1

### Single Mass Analysis (displaying only valid results)

Tolerance = 5.0 PPM / DBE: min = -200.0, max = 200.0

Selected filters: None

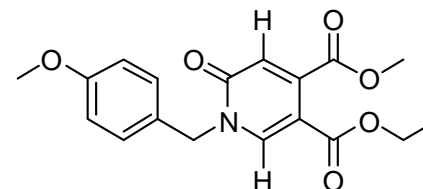

Monoisotopic Mass, Even Electron Ions

13 formula(e) evaluated with 1 results within limits (all results (up to 1000) for each mass)

Elements Used:

C: 0-100 H: 0-150 N: 1-1 O: 6-6 Na: 1-1

4a

12092645 67 (1.741) AM (Top,4, Ar,5000.0,475.27,1.00,LS 10); Sm (Mn, 2x1.00); Sb (1,40.00); Cm (66:67)

17:50:38  
1: TOF MS ES+  
1.64e3

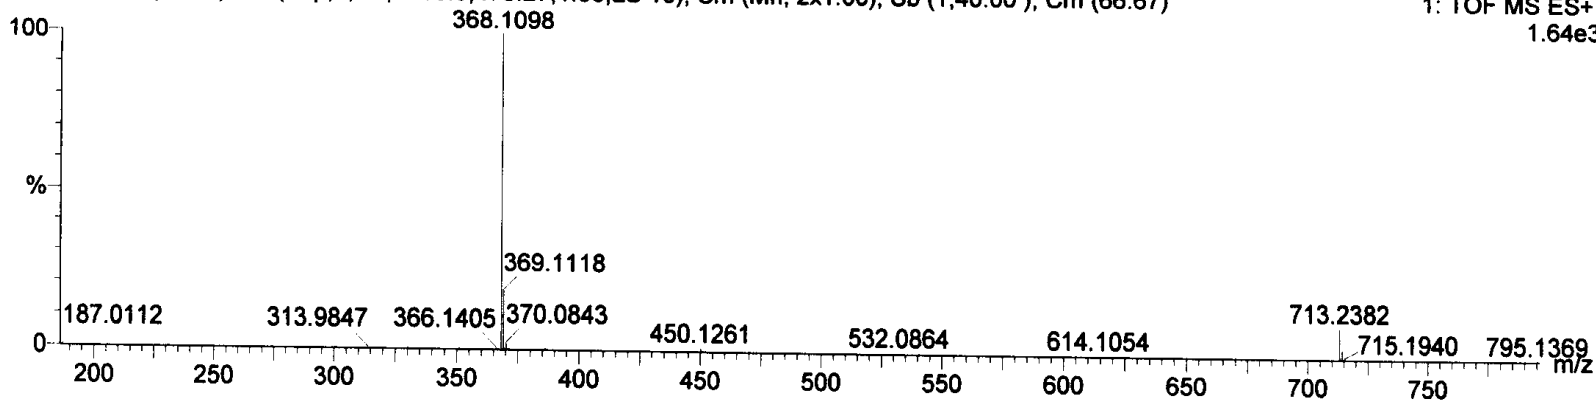

Minimum: -200.0  
Maximum: 5.0 5.0 200.0

| Mass     | Calc. Mass | mDa  | PPM  | DBE | i-FIT | Formula         |
|----------|------------|------|------|-----|-------|-----------------|
| 368.1098 | 368.1110   | -1.2 | -3.3 | 9.5 | 36.2  | C18 H19 N O6 Na |



## Elemental Composition Report

Page 1

### Single Mass Analysis (displaying only valid results)

Tolerance = 5.0 PPM / DBE: min = -200.0, max = 200.0

Selected filters: None

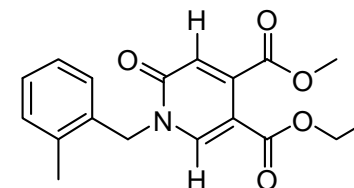

Monoisotopic Mass, Even Electron Ions

13 formula(e) evaluated with 1 results within limits (all results (up to 1000) for each mass)

Elements Used:

C: 0-100 H: 0-150 N: 1-1 O: 5-5 Na: 1-1

4a1n

12092700 65 (1.658) AM (Top,4, Ar,5000.0,475.27,1.00,LS 10); Sm (Mn, 2x1.00); Sb (1,40.00); Cm (64:77)

09:17:43

1: TOF MS ES+

1.57e4

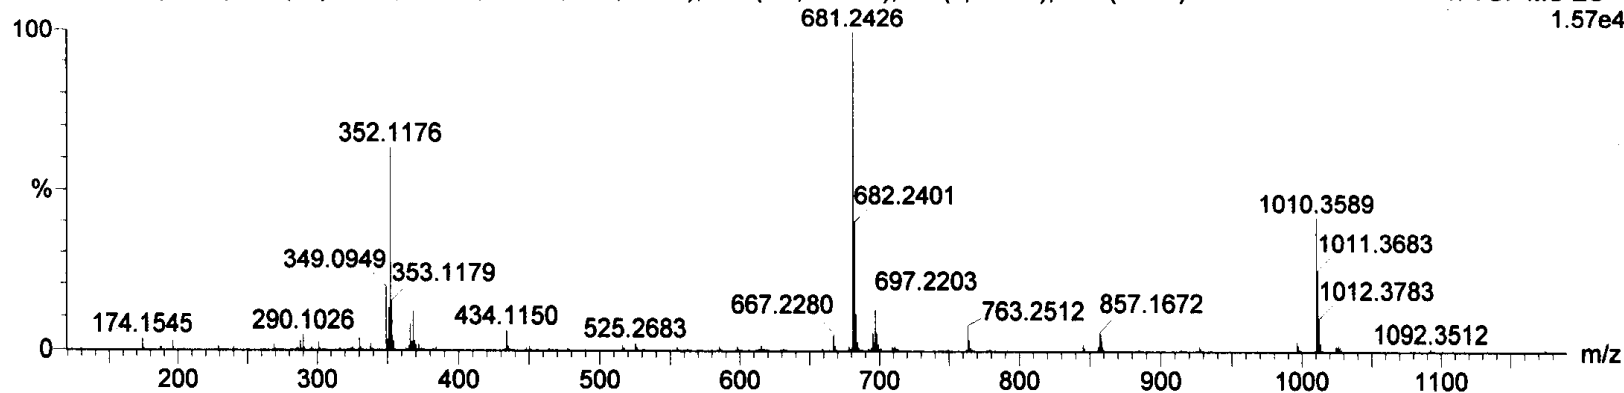

Minimum: -200.0

Maximum: 5.0 5.0 200.0

| Mass     | Calc. Mass | mDa | PPM | DBE | i-FIT | Formula         |
|----------|------------|-----|-----|-----|-------|-----------------|
| 352.1176 | 352.1161   | 1.5 | 4.3 | 9.5 | 28.7  | C18 H19 N O5 Na |

## Elemental Composition Report

Page 1

### Single Mass Analysis (displaying only valid results)

Tolerance = 5.0 PPM / DBE: min = -200.0, max = 200.0

Selected filters: None

Monoisotopic Mass, Even Electron Ions

13 formula(e) evaluated with 1 results within limits (all results (up to 1000) for each mass)

Elements Used:

C: 0-100 H: 0-150 N: 1-1 O: 5-5 Na: 1-1

4a

12092701 34 (0.863) AM (Top,4, Ar,5000.0,475.27,1.00,LS 10); Sm (Mn, 2x1.00); Sb (1,40.00); Cm (15:34)

09:24:38  
1: TOF MS ES+  
1.36e4

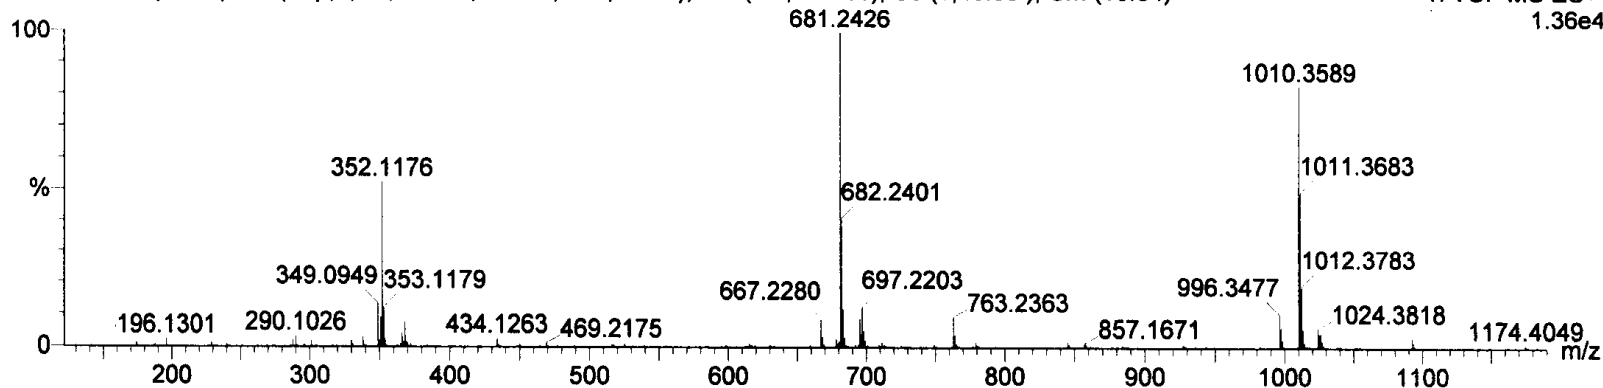

Minimum: -200.0  
Maximum: 5.0 5.0 200.0

| Mass     | Calc. Mass | mDa | PPM | DBE | i-FIT | Formula         |
|----------|------------|-----|-----|-----|-------|-----------------|
| 352.1176 | 352.1161   | 1.5 | 4.3 | 9.5 | 16.6  | C18 H19 N O5 Na |

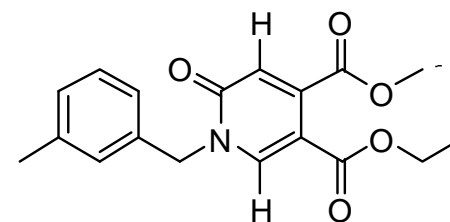

## Elemental Composition Report

Page 1

### Single Mass Analysis (displaying only valid results)

Tolerance = 5.0 PPM / DBE: min = -200.0, max = 200.0

Selected filters: None

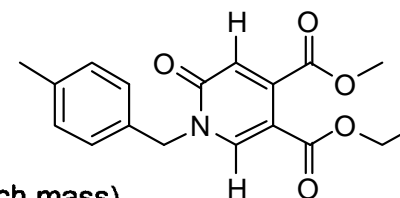

Monoisotopic Mass, Even Electron Ions

13 formula(e) evaluated with 1 results within limits (all results (up to 1000) for each mass)

Elements Used:

C: 0-100 H: 0-150 N: 1-1 O: 5-5 Na: 1-1

4a

12092702 72 (1.829) AM (Top,4, Ar,5000.0,475.27,1.00,LS 10); Sm (Mn, 2x1.00); Sb (1,40.00); Cm (65:77)

09:31:14  
1: TOF MS ES+  
1.09e4

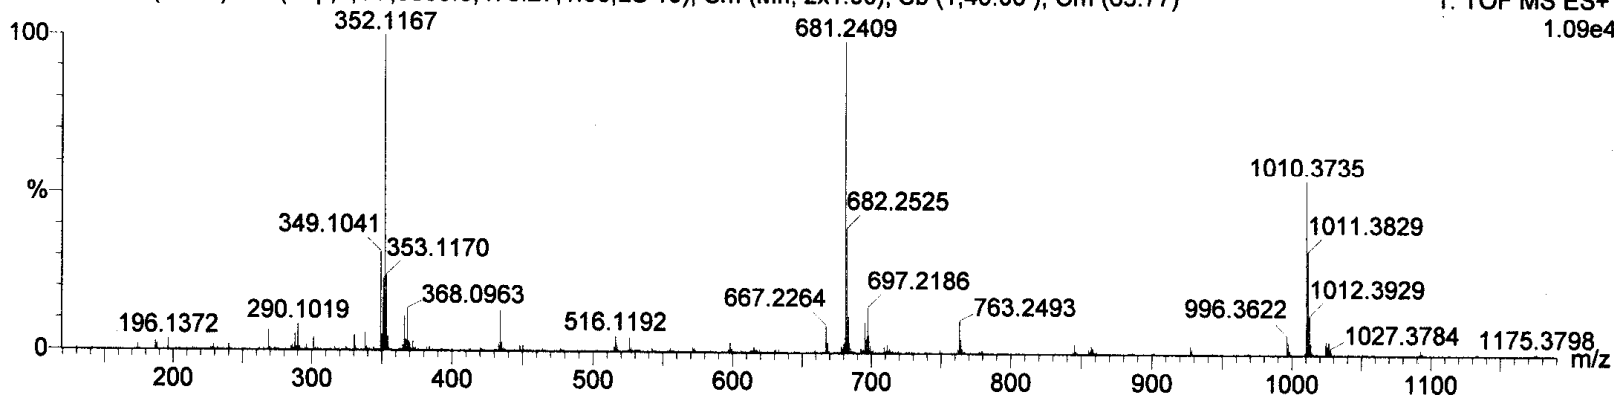

Minimum: -200.0  
Maximum: 5.0 5.0 200.0

| Mass     | Calc. Mass | mDa | PPM | DBE | i-FIT | Formula         |
|----------|------------|-----|-----|-----|-------|-----------------|
| 352.1167 | 352.1161   | 0.6 | 1.7 | 9.5 | 35.7  | C18 H19 N O5 Na |

## Elemental Composition Report

Page 1

### Single Mass Analysis (displaying only valid results)

Tolerance = 5.0 PPM / DBE: min = -200.0, max = 200.0

Selected filters: None

Monoisotopic Mass, Even Electron Ions

12 formula(e) evaluated with 1 results within limits (all results (up to 1000) for each mass)

Elements Used:

C: 0-100 H: 0-150 N: 1-1 O: 5-5 Na: 1-1

4a

12092647 77 (1.963) AM (Top,4, Ar,5000.0,475.27,1.00,LS 10); Sm (Mn, 2x1.00); Sb (1,40.00); Cm (76:77)

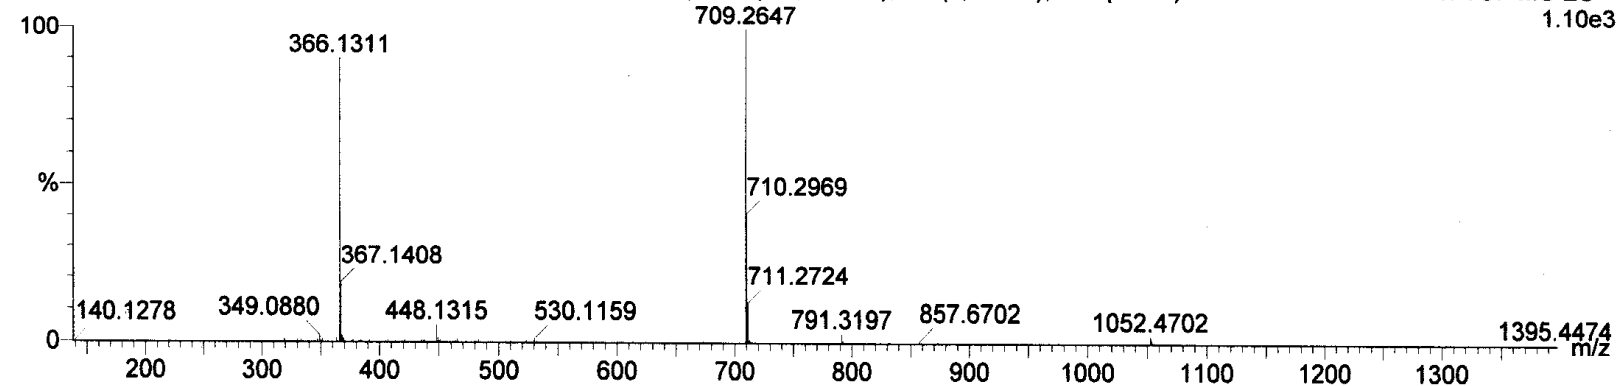

Minimum: -200.0  
Maximum: 5.0 5.0 200.0

| Mass     | Calc. Mass | mDa  | PPM  | DBE | i-FIT | Formula                                             |
|----------|------------|------|------|-----|-------|-----------------------------------------------------|
| 366.1311 | 366.1317   | -0.6 | -1.6 | 9.5 | 6.7   | C <sub>19</sub> H <sub>21</sub> N O <sub>5</sub> Na |

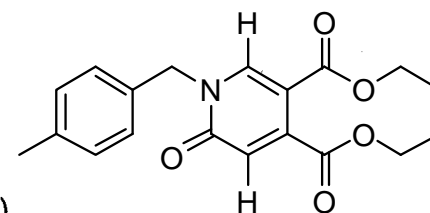

## Elemental Composition Report

Page 1

### Single Mass Analysis (displaying only valid results)

Tolerance = 50.0 PPM / DBE: min = -200.0, max = 200.0

Selected filters: None

Monoisotopic Mass, Even Electron Ions

13 formula(e) evaluated with 1 results within limits (all results (up to 1000) for each mass)

Elements Used:

C: 0-100 H: 0-150 N: 1-1 O: 5-5 Na: 1-1

~~400~~ 409

12092704 57 (0.967) AM (Top,4, Ar,5000.0,475.27,1.00,LS 10); Sm (Mn, 2x1.00); Sb (1,40.00); Cm (35:38)

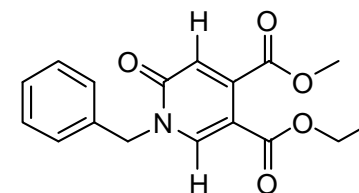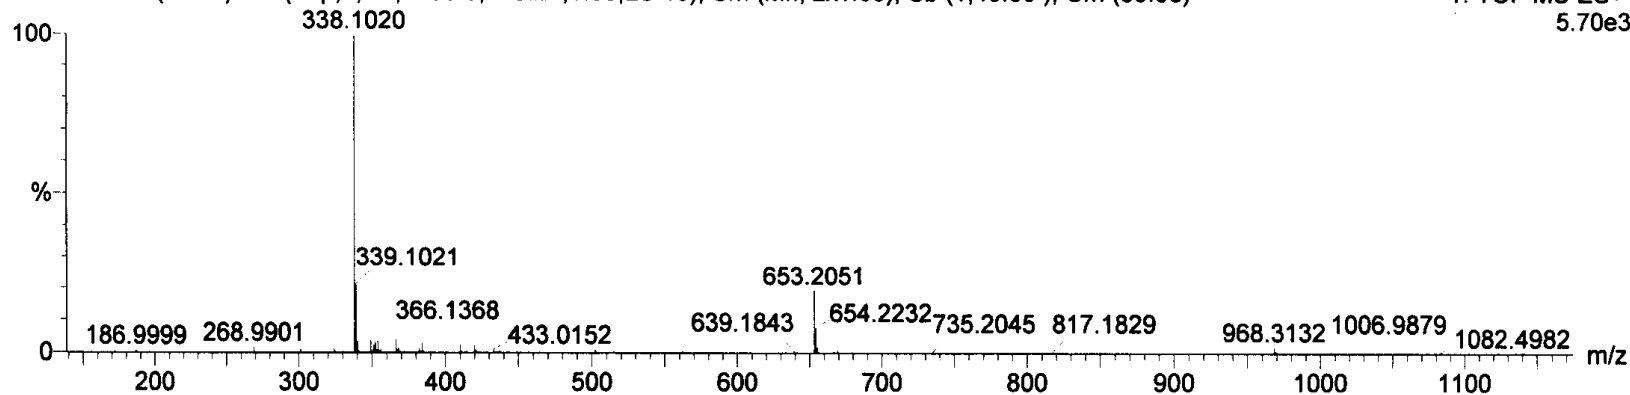

09:49:49  
1: TOF MS ES+  
5.70e3

Minimum: -200.0  
Maximum: 5.0 50.0 200.0

| Mass     | Calc. Mass | mDa | PPM | DBE | i-FIT | Formula         |
|----------|------------|-----|-----|-----|-------|-----------------|
| 338.1020 | 338.1004   | 1.6 | 4.7 | 9.5 | 4.6   | C17 H17 N O5 Na |

## Elemental Composition Report

Page 1

### Single Mass Analysis (displaying only valid results)

Tolerance = 50.0 PPM / DBE: min = -200.0, max = 200.0

Selected filters: None

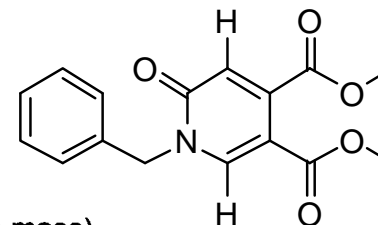

Monoisotopic Mass, Even Electron Ions

13 formula(e) evaluated with 1 results within limits (all results (up to 1000) for each mass)

Elements Used:

C: 0-100 H: 0-150 N: 1-1 O: 5-5 Na: 1-1

*400, 407*

12092705 42 (1.058) AM (Top,4, Ar,5000.0,475.27,1.00,LS 10); Sm (Mn, 2x1.00); Sb (1,40.00); Cm (41:42)

10:00:02  
1: TOF MS ES+  
1.79e3

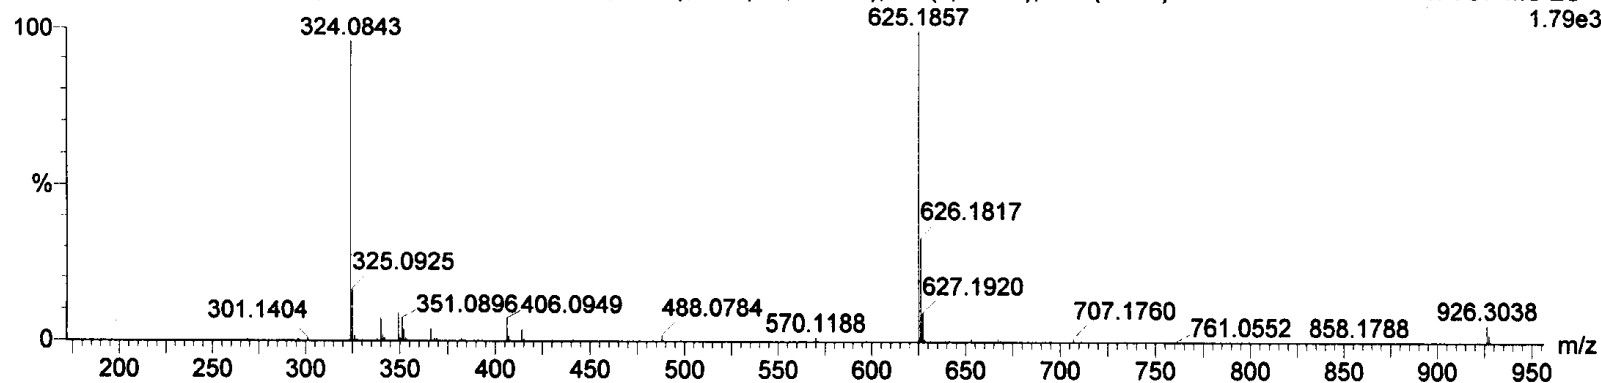

Minimum: -200.0  
Maximum: 5.0 50.0 200.0

| Mass     | Calc. Mass | mDa  | PPM  | DBE | i-FIT | Formula         |
|----------|------------|------|------|-----|-------|-----------------|
| 324.0843 | 324.0848   | -0.5 | -1.5 | 9.5 | 6.6   | C16 H15 N O5 Na |

## Elemental Composition Report

Page 1

### Single Mass Analysis (displaying only valid results)

Tolerance = 50.0 PPM / DBE: min = -200.0, max = 200.0

Selected filters: None

Monoisotopic Mass, Even Electron Ions

13 formula(e) evaluated with 1 results within limits (all results (up to 1000) for each mass)

Elements Used:

C: 0-100 H: 0-150 N: 1-1 O: 5-5 Na: 1-1

4 a 5

12120304 58 (1.485) AM (Top,4, Ar,5000.0,475.27,1.00,LS 10); Sm (Mn, 2x1.00); Sb (1,40.00); Cm (52:64)

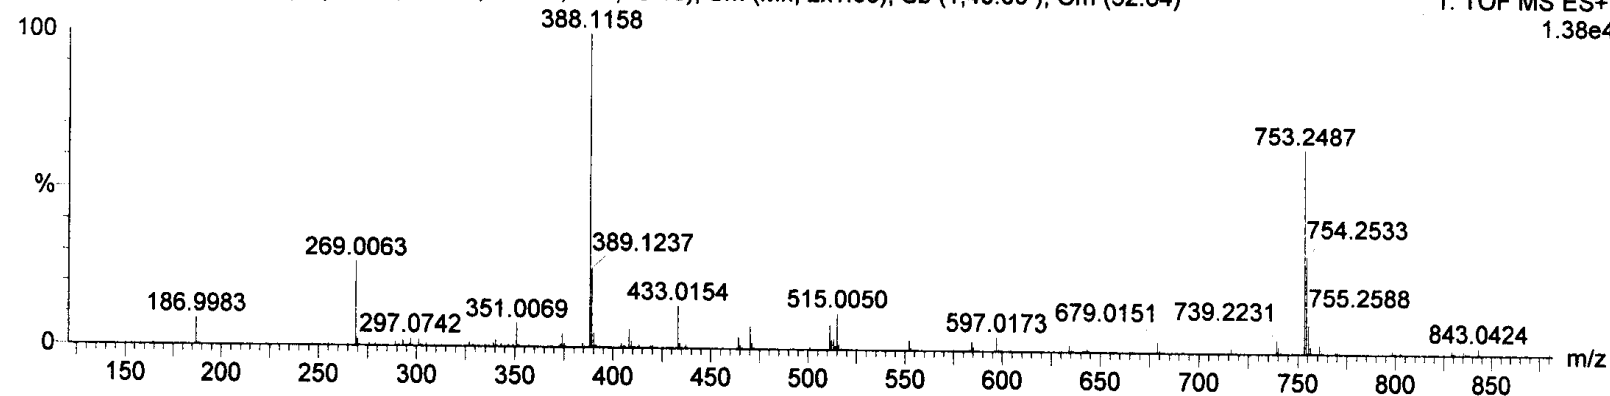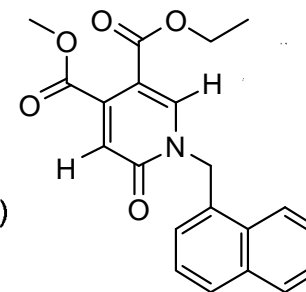

|          |            |      |      |        |       |                 |
|----------|------------|------|------|--------|-------|-----------------|
| Minimum: |            |      |      | -200.0 |       |                 |
| Maximum: |            | 5.0  | 50.0 | 200.0  |       |                 |
| Mass     | Calc. Mass | mDa  | PPM  | DBE    | i-FIT | Formula         |
| 388.1158 | 388.1161   | -0.3 | -0.8 | 12.5   | 8.4   | C21 H19 N O5 Na |

## Elemental Composition Report

Page 1

### Single Mass Analysis (displaying only valid results)

Tolerance = 5.0 PPM / DBE: min = -200.0, max = 200.0

Selected filters: None

Monoisotopic Mass, Even Electron Ions

13 formula(e) evaluated with 1 results within limits (all results (up to 1000) for each mass)

Elements Used:

C: 0-120 H: 0-150 N: 2-2 O: 10-10 Na: 1-1

~~COX-11~~ **4at**

13032812 21 (0.390) AM (Cen,2, 80.00, Ht,5000.0,0.00,1.00); Sm (Mn, 2x1.00); Cm (19:25)

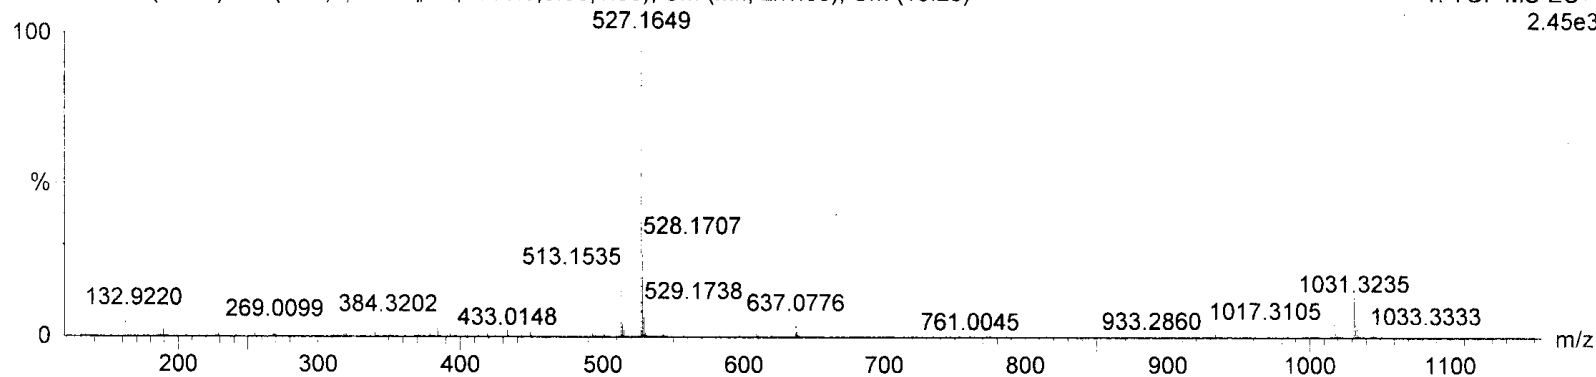

Minimum: -200.0  
Maximum: 5.0 5.0 200.0

| Mass     | Calc. Mass | mDa | PPM | DBE  | i-FIT | Formula           |
|----------|------------|-----|-----|------|-------|-------------------|
| 527.1649 | 527.1642   | 0.7 | 1.3 | 11.5 | 0.6   | C24 H28 N2 O10 Na |

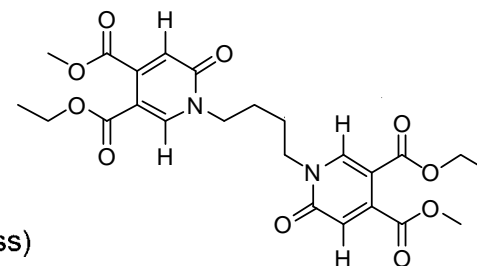

11:22:07  
1: TOF MS ES+  
2.45e3



## Elemental Composition Report

Page 1

### Single Mass Analysis (displaying only valid results)

Tolerance = 50.0 PPM / DBE: min = -200.0, max = 200.0

Selected filters: None

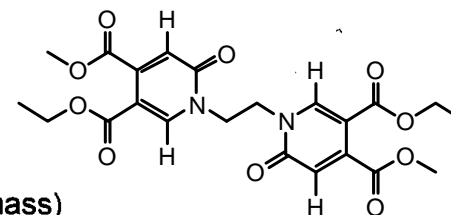

Monoisotopic Mass, Even Electron Ions

13 formula(e) evaluated with 1 results within limits (all results (up to 1000) for each mass)

Elements Used:

C: 0-100 H: 0-150 N: 2-2 O: 10-10 Na: 1-1

*4 a u*

12120307 78 (1.970) AM (Top,4, Ar,5000.0,475.27,1.00,LS 10); Sm (Mn, 2x1.00); Sb (1,40.00 ); Cm (77:78)

10:30:22  
1: TOF MS ES+  
2.45e3

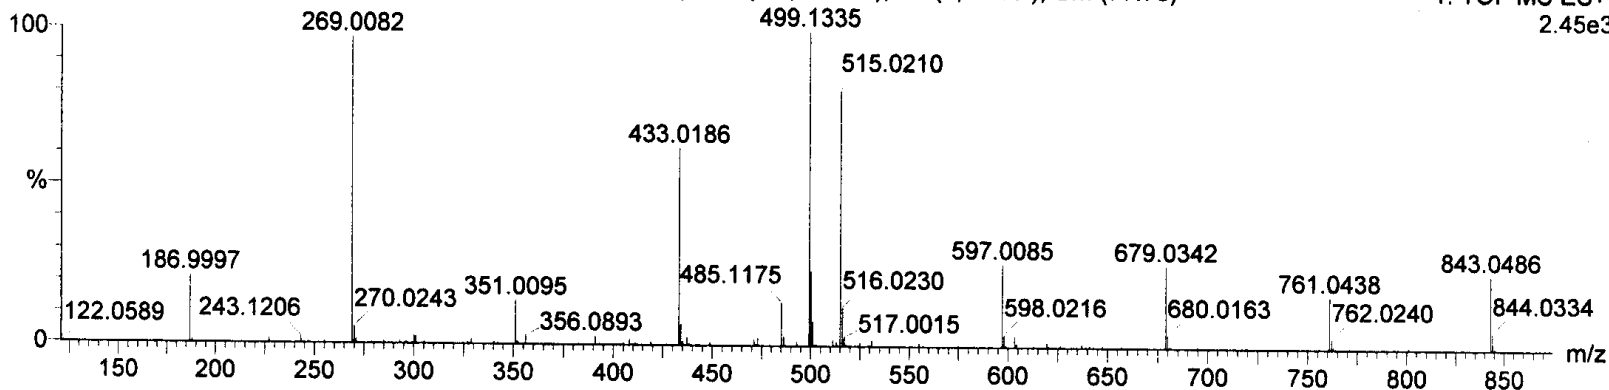

Minimum: -200.0  
Maximum: 5.0 50.0 200.0

| Mass     | Calc. Mass | mDa | PPM | DBE  | i-FIT | Formula           |
|----------|------------|-----|-----|------|-------|-------------------|
| 499.1335 | 499.1329   | 0.6 | 1.2 | 11.5 | 14.7  | C22 H24 N2 O10 Na |

## Elemental Composition Report

Page 1

### Single Mass Analysis (displaying only valid results)

Tolerance = 5.0 PPM / DBE: min = -200.0, max = 200.0

Selected filters: None

Monoisotopic Mass, Even Electron Ions

13 formula(e) evaluated with 1 results within limits (all results (up to 1000) for each mass)

Elements Used:

C: 0-120 H: 0-150 N: 1-1 O: 5-5 Na: 1-1

~~COX-13~~ *4aV*

13032814 29 (0.543) AM (Cen,2, 80.00, Ht,5000.0,0.00,1.00); Sm (Mn, 2x1.00); Cm (24:34)

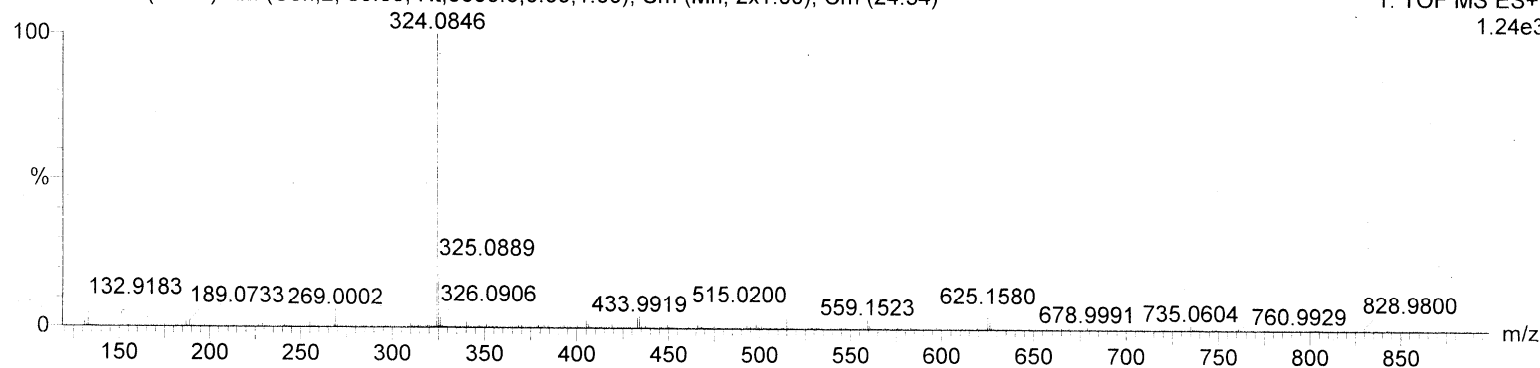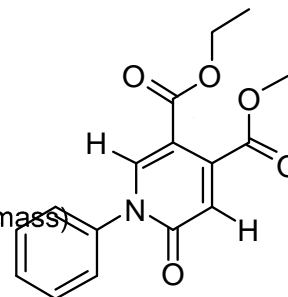

Minimum: -200.0  
Maximum: 5.0 5.0 200.0

| Mass     | Calc. Mass | mDa  | PPM  | DBE | i-FIT | Formula         |
|----------|------------|------|------|-----|-------|-----------------|
| 324.0846 | 324.0848   | -0.2 | -0.6 | 9.5 | 0.1   | C16 H15 N O5 Na |

## Elemental Composition Report

Page 1

### Single Mass Analysis (displaying only valid results)

Tolerance = 5.0 PPM / DBE: min = -200.0, max = 200.0

Selected filters: None

Monoisotopic Mass, Even Electron Ions

13 formula(e) evaluated with 1 results within limits (all results (up to 1000) for each mass)

Elements Used:

C: 0-120 H: 0-150 N: 1-1 O: 7-7 Na: 1-1

CQX-1

13032802 51 (0.952) AM (Gen,2, 80.00, Ht,5000.0,0.00,1.00); Sm (Mn, 2x1.00); Cm (51:70)

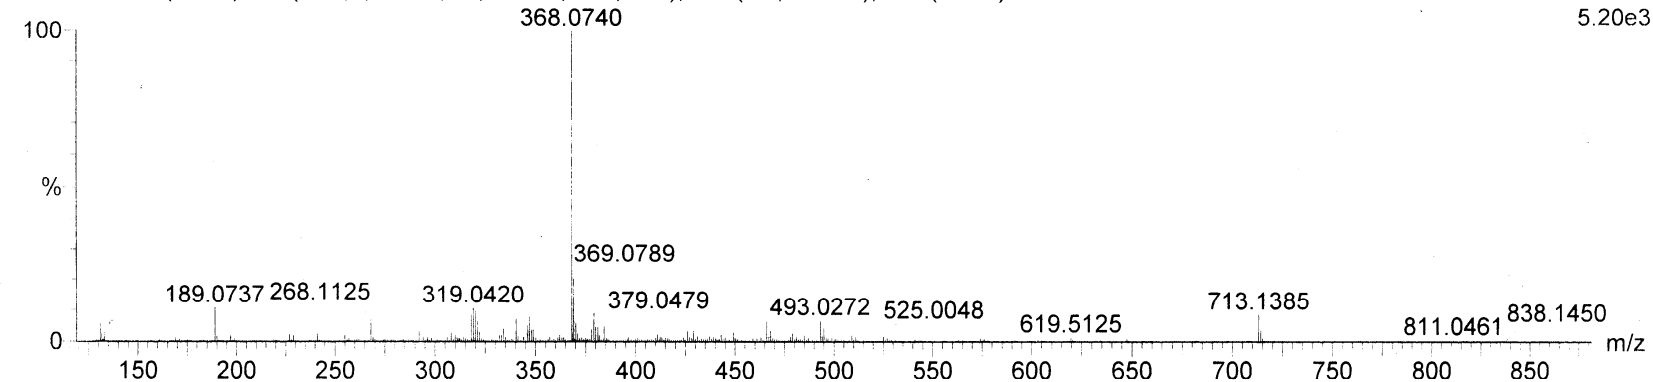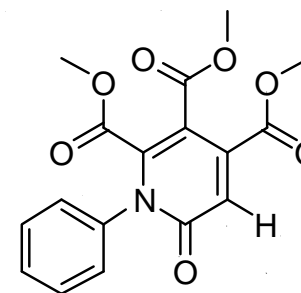

Minimum: -200.0  
Maximum: 5.0 5.0 200.0

| Mass     | Calc. Mass | mDa  | PPM  | DBE  | i-FIT | Formula         |
|----------|------------|------|------|------|-------|-----------------|
| 368.0740 | 368.0746   | -0.6 | -1.6 | 10.5 | 28.2  | C17 H15 N O7 Na |

## Elemental Composition Report

### Single Mass Analysis (displaying only valid results)

Tolerance = 5.0 PPM / DBE: min = -200.0, max = 200.0

Selected filters: None

Monoisotopic Mass, Even Electron Ions

13 formula(e) evaluated with 1 results within limits (all results (up to 1000) for each mass)

Elements Used:

C: 0-120 H: 0-150 N: 1-1 O: 7-7 Na: 1-1

CQX-2

13032803 55 (1.023) AM (Cen,2, 80.00, Ht,5000.0,0.00,1.00); Sm (Mn, 2x1.00); Cm (44:55)

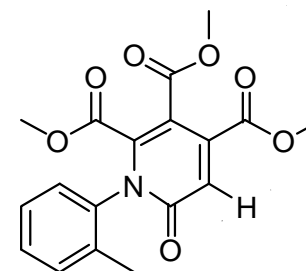

10:29:17  
1: TOF MS ES+  
3.11e3

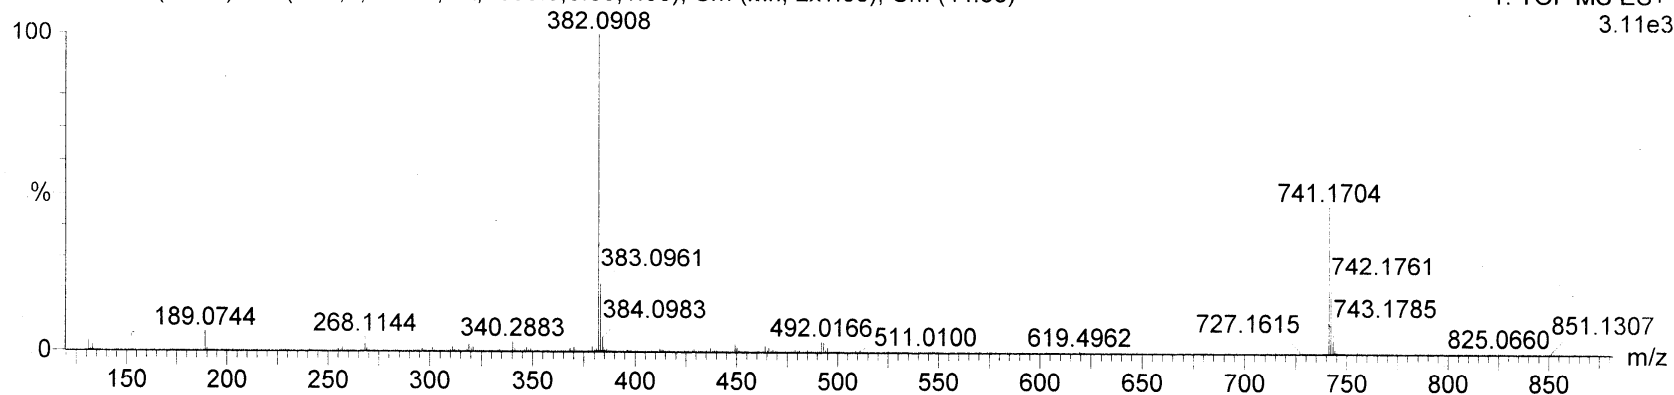

Minimum: -200.0  
Maximum: 5.0 5.0 200.0

| Mass     | Calc. Mass | mDa | PPM | DBE  | i-FIT | Formula         |
|----------|------------|-----|-----|------|-------|-----------------|
| 382.0908 | 382.0903   | 0.5 | 1.3 | 10.5 | 1.9   | C18 H17 N O7 Na |

## Elemental Composition Report

Page 1

### Single Mass Analysis (displaying only valid results)

Tolerance = 5.0 PPM / DBE: min = -200.0, max = 200.0

Selected filters: None

Monoisotopic Mass, Even Electron Ions

13 formula(e) evaluated with 1 results within limits (all results (up to 1000) for each mass)

Elements Used:

C: 0-120 H: 0-150 N: 1-1 O: 7-7 Na: 1-1

CQX-3

13032804 57 (1.059) AM (Cen,2, 80.00, Ht,5000.0,0.00,1.00); Sm (Mn, 2x1.00); Cm (50:58)

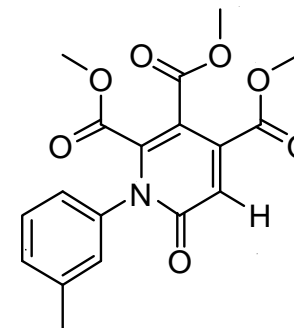

10:35:17  
1: TOF MS ES+  
2.57e3

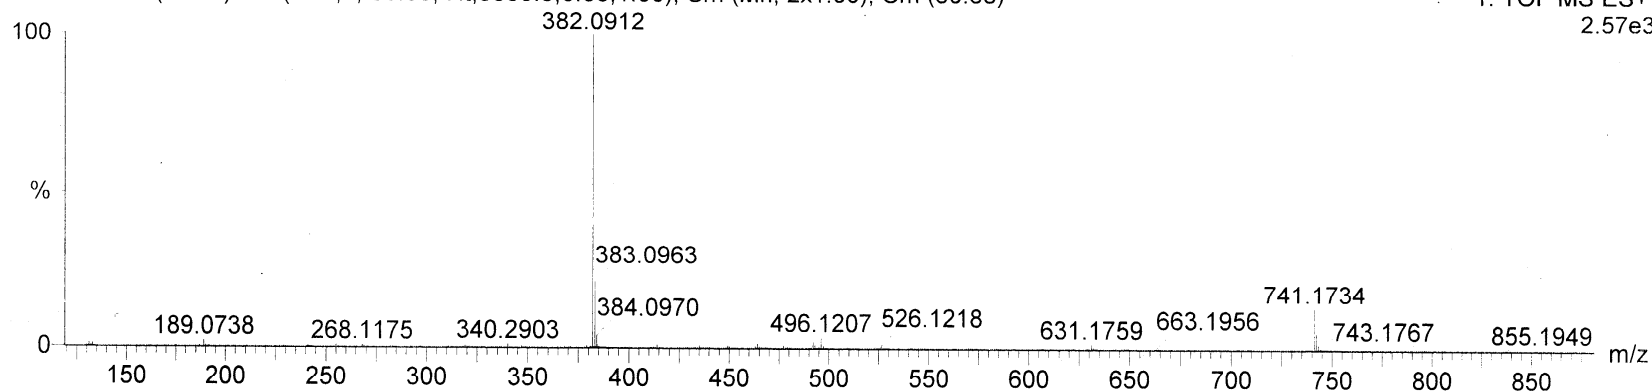

Minimum: -200.0  
Maximum: 5.0 5.0 200.0

| Mass     | Calc. Mass | mDa | PPM | DBE  | i-FIT | Formula         |
|----------|------------|-----|-----|------|-------|-----------------|
| 382.0912 | 382.0903   | 0.9 | 2.4 | 10.5 | 0.2   | C18 H17 N O7 Na |

## Elemental Composition Report

Page 1

### Single Mass Analysis (displaying only valid results)

Tolerance = 5.0 PPM / DBE: min = -200.0, max = 200.0

Selected filters: None

Monoisotopic Mass, Even Electron Ions

13 formula(e) evaluated with 1 results within limits (all results (up to 1000) for each mass)

Elements Used:

C: 0-120 H: 0-150 N: 1-1 O: 7-7 Na: 1-1

CQX-4

13032805 36 (0.669) AM (Cen,2, 80.00, Ht,5000.0,0.00,1.00); Sm (Mn, 2x1.00); Cm (28:36)

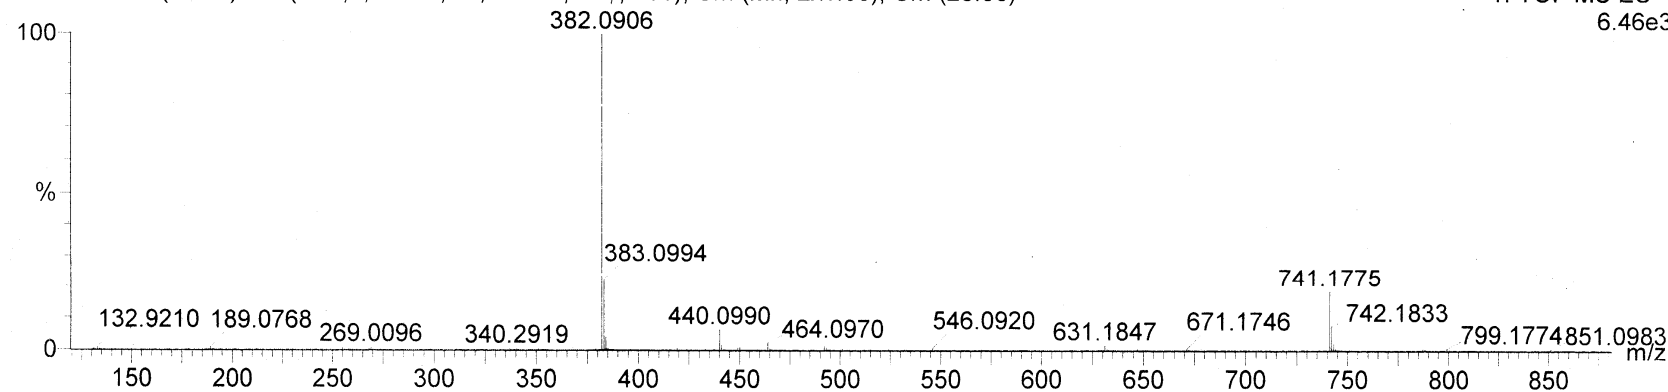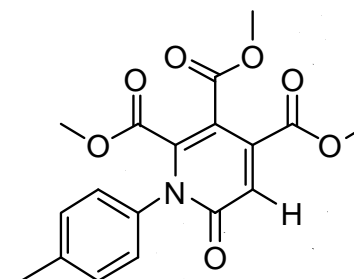

Minimum: -200.0  
Maximum: 5.0 5.0 200.0

| Mass     | Calc. Mass | mDa | PPM | DBE  | i-FIT | Formula         |
|----------|------------|-----|-----|------|-------|-----------------|
| 382.0906 | 382.0903   | 0.3 | 0.8 | 10.5 | 4.5   | C18 H17 N O7 Na |

## Elemental Composition Report

Page 1

### Single Mass Analysis (displaying only valid results)

Tolerance = 5.0 PPM / DBE: min = -200.0, max = 200.0

Selected filters: None

Monoisotopic Mass, Even Electron Ions

13 formula(e) evaluated with 1 results within limits (all results (up to 1000) for each mass)

Elements Used:

C: 0-120 H: 0-150 N: 1-1 O: 7-7 F: 1-1 Na: 1-1

CQX-5

13032806 67 (1.249) AM (Cen,2, 80.00, Ht,5000.0,0.00,1.00); Sm (Mn, 2x1.00); Cm (53:70)

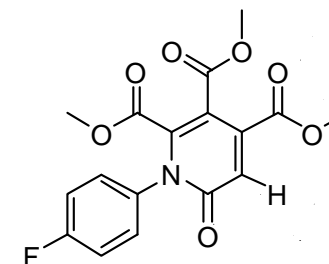

10:46:10  
1: TOF MS ES+  
3.40e3

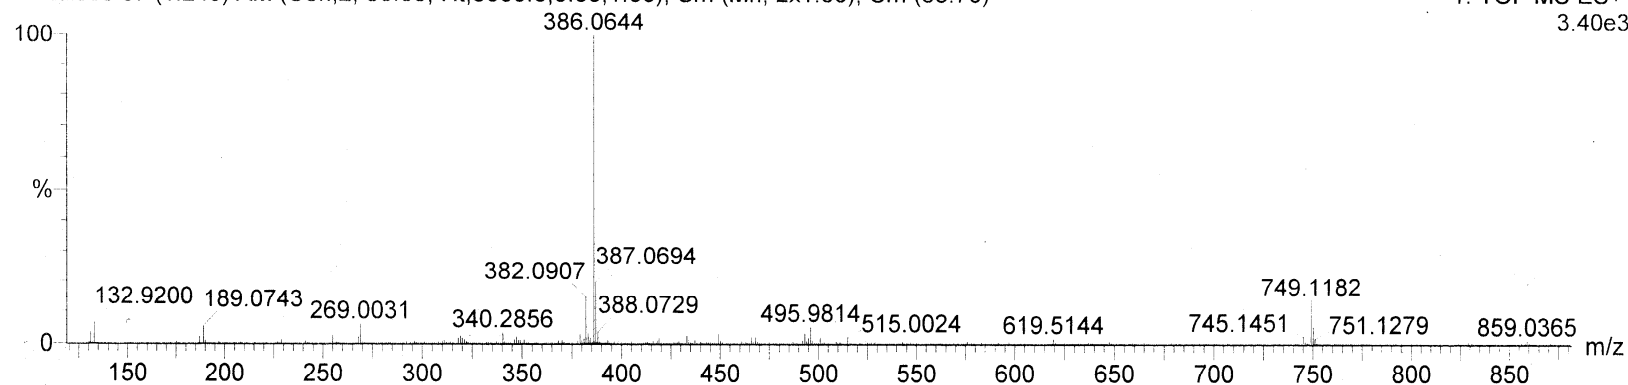

Minimum: -200.0  
Maximum: 5.0 5.0 200.0

| Mass     | Calc. Mass | mDa  | PPM  | DBE  | i-FIT | Formula           |
|----------|------------|------|------|------|-------|-------------------|
| 386.0644 | 386.0652   | -0.8 | -2.1 | 10.5 | 0.2   | C17 H14 N O7 F Na |

## Elemental Composition Report

Page 1

### Single Mass Analysis (displaying only valid results)

Tolerance = 5.0 PPM / DBE: min = -200.0, max = 200.0

Selected filters: None

Monoisotopic Mass, Even Electron Ions

13 formula(e) evaluated with 1 results within limits (all results (up to 1000) for each mass)

Elements Used:

C: 0-120 H: 0-150 N: 1-1 O: 7-7 Na: 1-1 Cl: 1-1

CQX-6

13032807 48 (0.891) AM (Cen,2, 80.00, Ht,5000.0,0.00,1.00); Sm (Mn, 2x1.00); Cm (41:52)

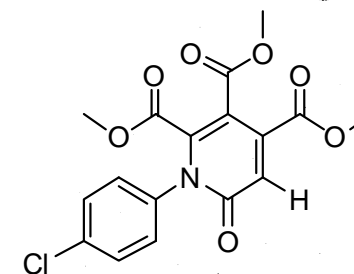

10:52:22  
1: TOF MS ES+  
1.57e3

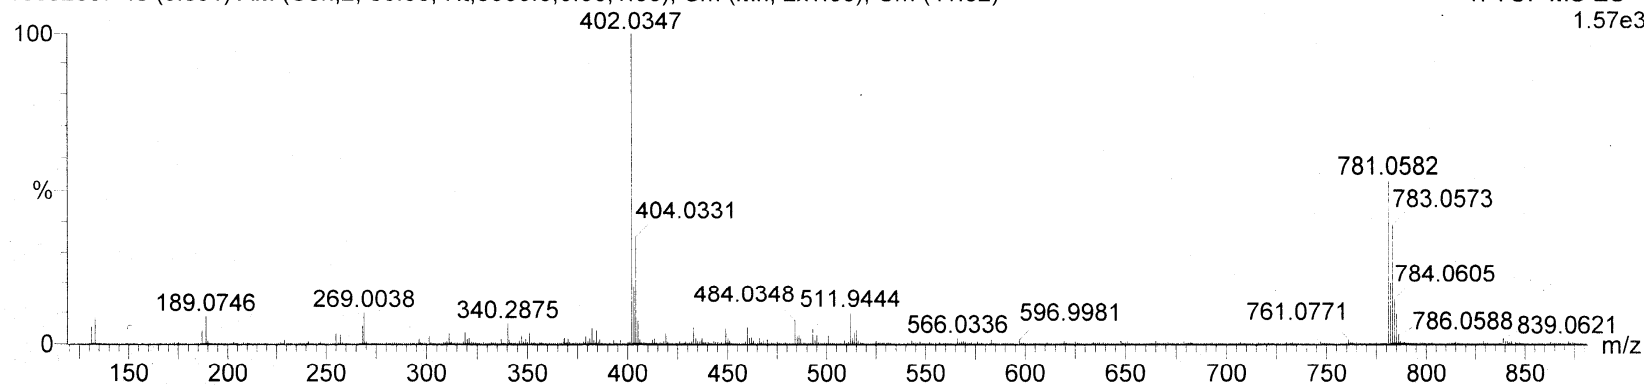

Minimum: -200.0  
Maximum: 5.0 5.0 200.0

| Mass     | Calc. Mass | mDa  | PPM  | DBE  | i-FIT | Formula            |
|----------|------------|------|------|------|-------|--------------------|
| 402.0347 | 402.0356   | -0.9 | -2.2 | 10.5 | 0.4   | C17 H14 N O7 Na Cl |



## Elemental Composition Report

Page 1

### Single Mass Analysis (displaying only valid results)

Tolerance = 5.0 PPM / DBE: min = -200.0, max = 200.0

Selected filters: None

Monoisotopic Mass, Even Electron Ions

13 formula(e) evaluated with 1 results within limits (all results (up to 1000) for each mass)

Elements Used:

C: 0-120 H: 0-150 N: 1-1 O: 7-7 Na: 1-1 Br: 1-1

CQX-7

13032808 51 (0.950) AM (Cen,2, 80.00, Ht,5000.0,0.00,1.00); Sm (Mn, 2x1.00); Cm (43:52)

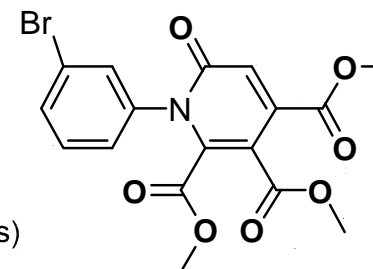

10:57:16  
1: TOF MS ES+  
574

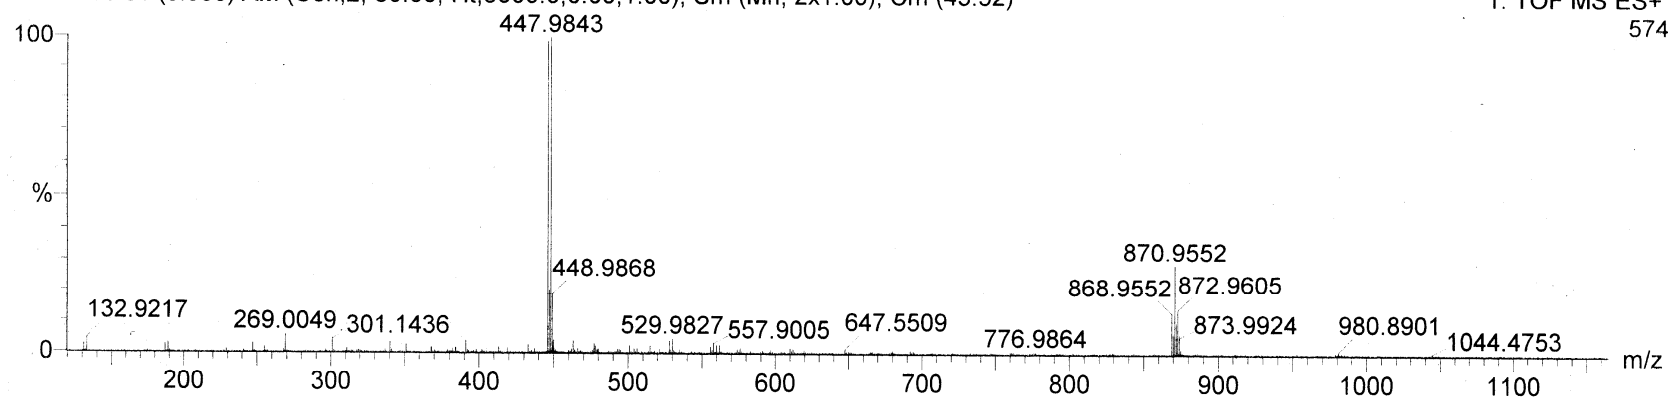

Minimum: -200.0  
Maximum: 5.0 5.0 200.0

| Mass     | Calc. Mass | mDa | PPM | DBE  | i-FIT | Formula            |
|----------|------------|-----|-----|------|-------|--------------------|
| 445.9858 | 445.9851   | 0.7 | 1.6 | 10.5 | 0.1   | C17 H14 N O7 Na Br |

## Elemental Composition Report

### Single Mass Analysis (displaying only valid results)

Tolerance = 5.0 PPM / DBE: min = -200.0, max = 200.0

Selected filters: None

Monoisotopic Mass, Even Electron Ions

13 formula(e) evaluated with 1 results within limits (all results (up to 1000) for each mass)

Elements Used:

C: 0-120 H: 0-150 N: 1-1 O: 8-8 Na: 1-1

CQX-8

13032809 32 (0.594) AM (Cen,2, 80.00, Ht,5000.0,0.00,1.00); Sm (Mn, 2x1.00); Cm (22:33)

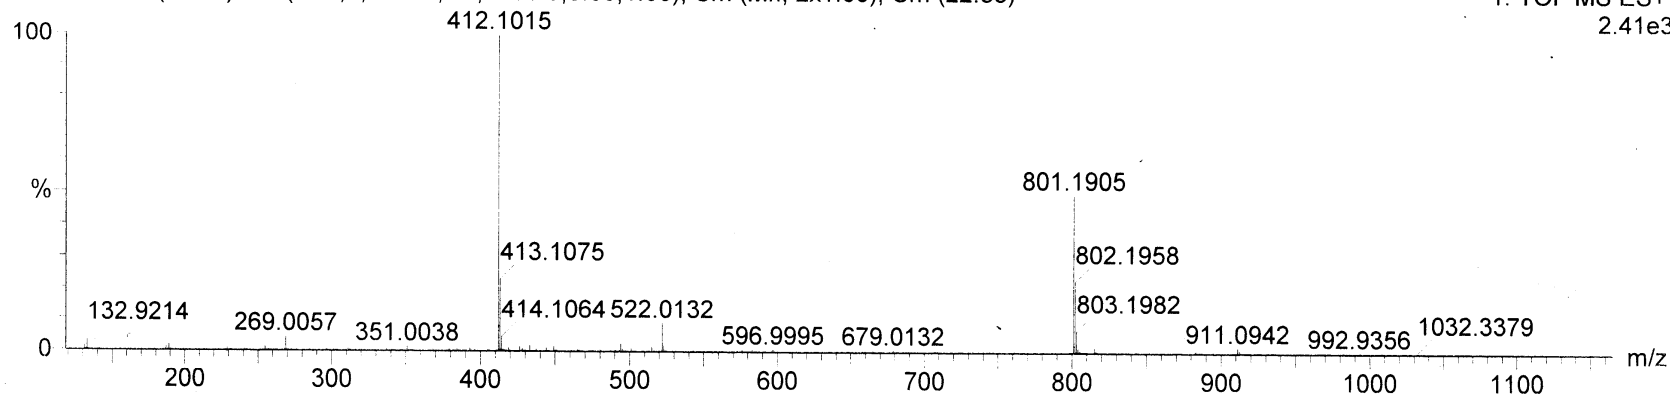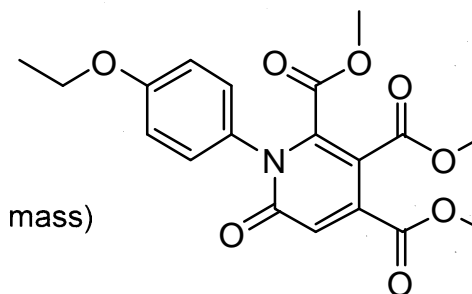

Minimum: -200.0  
Maximum: 5.0 5.0 200.0

| Mass     | Calc. Mass | mDa | PPM | DBE  | i-FIT | Formula         |
|----------|------------|-----|-----|------|-------|-----------------|
| 412.1015 | 412.1008   | 0.7 | 1.7 | 10.5 | 0.6   | C19 H19 N O8 Na |

## Elemental Composition Report

### Single Mass Analysis (displaying only valid results)

Tolerance = 5.0 PPM / DBE: min = -200.0, max = 200.0

Selected filters: None

Monoisotopic Mass, Even Electron Ions

13 formula(e) evaluated with 1 results within limits (all results (up to 1000) for each mass)

Elements Used:

C: 0-120 H: 0-150 N: 1-1 O: 7-7 Na: 1-1

CQX-9

13032810 59 (1.098) AM (Cen,2, 80.00, Ht,5000.0,0.00,1.00); Sm (Mn, 2x1.00); Cm (57:69)

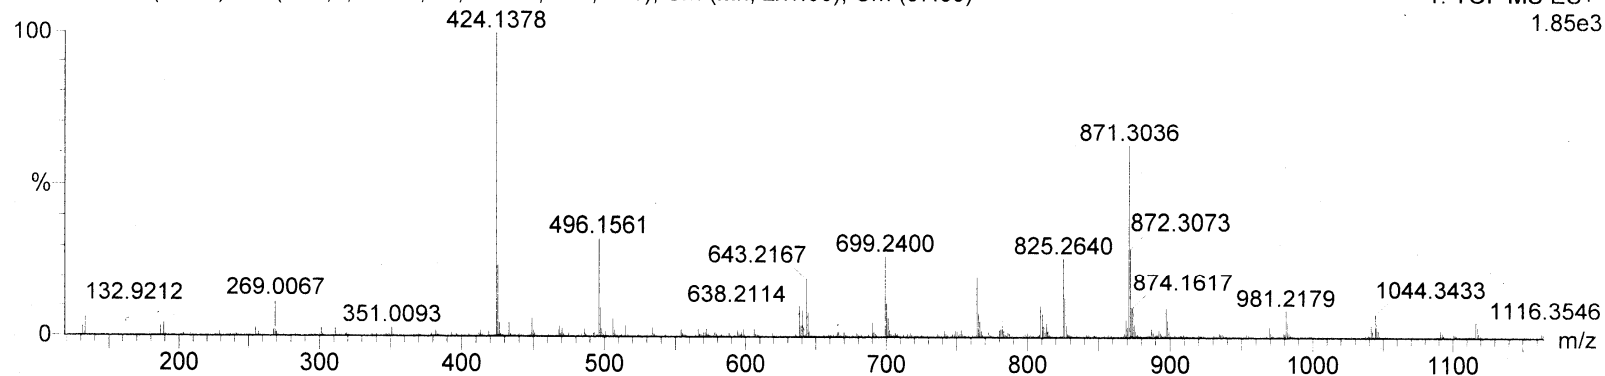

Minimum: -200.0  
Maximum: 5.0 5.0 200.0

| Mass     | Calc. Mass | mDa | PPM | DBE  | i-FIT | Formula         |
|----------|------------|-----|-----|------|-------|-----------------|
| 424.1378 | 424.1372   | 0.6 | 1.4 | 10.5 | 0.1   | C21 H23 N O7 Na |

Page 1

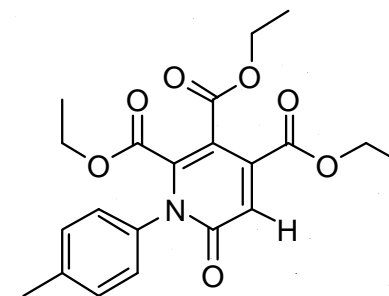

11:09:22  
1: TOF MS ES+  
1.85e3

## Elemental Composition Report

### Single Mass Analysis

Tolerance = 5.0 PPM / DBE: min = -1.5, max = 150.0

Element prediction: Off

Number of isotope peaks used for i-FIT = 3

Monoisotopic Mass, Even Electron Ions

4 formula(e) evaluated with 1 results within limits (up to 50 closest results for each mass)

Elements Used:

C: 0-150 H: 0-150 N: 2-2 O: 9-9 Na: 1-1

CQX-10

13042008 37 (0.614) AM (Cen,2, 80.00, Ht,5000.0,0.00,1.00); Sm (Mn, 2x3.00); Cm (27:39)

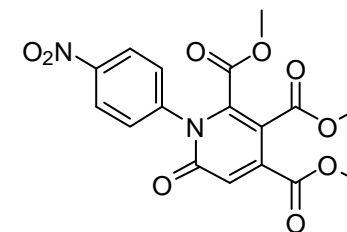

09:51:52  
1: TOF MS ES+  
2.97e+003

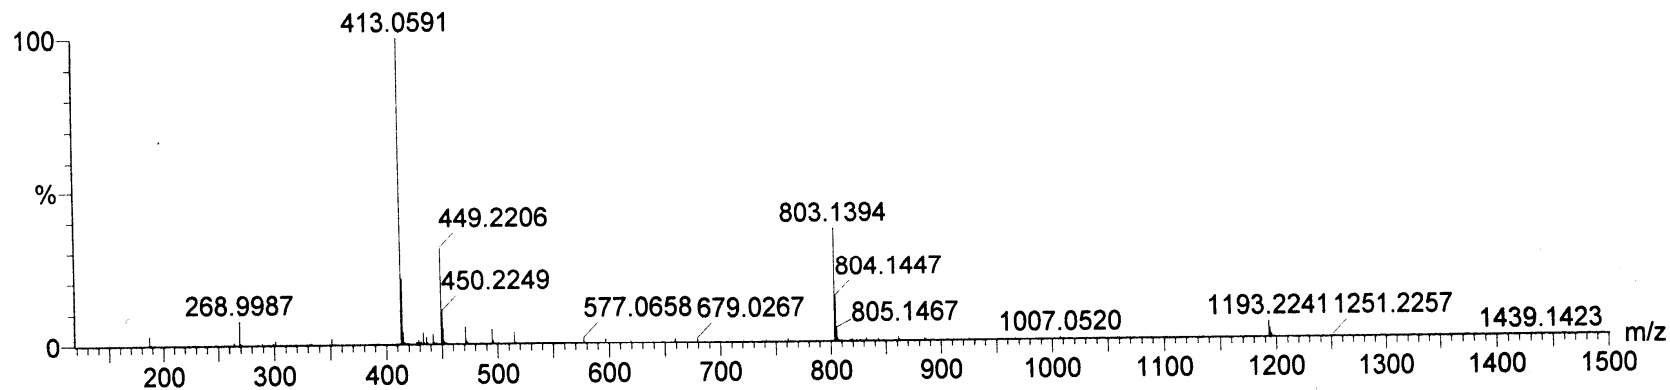

Minimum: -1.5  
Maximum: 5.0 5.0 150.0

| Mass     | Calc. Mass | mDa  | PPM  | DBE  | i-FIT | Formula          |
|----------|------------|------|------|------|-------|------------------|
| 413.0591 | 413.0597   | -0.6 | -1.5 | 11.5 | 1.5   | C17 H14 N2 O9 Na |

## Elemental Composition Report

Page 1

### Single Mass Analysis

Tolerance = 50.0 PPM / DBE: min = -1.5, max = 150.0

Element prediction: Off

Number of isotope peaks used for i-FIT = 3

Monoisotopic Mass, Even Electron Ions

4 formula(e) evaluated with 1 results within limits (up to 50 closest results for each mass)

Elements Used:

C: 0-150 H: 0-150 N: 1-1 O: 7-7 F: 3-3 Na: 1-1

CQX-1

13042007 2 (0.033) AM (Cen,2, 80.00, Ht,5000.0,0.00,1.00); Sm (Mn, 2x3.00); Cm (1:4)

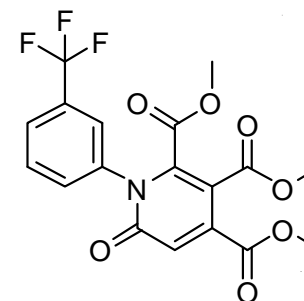

09:43:19  
1: TOF MS ES+  
2.64e+003

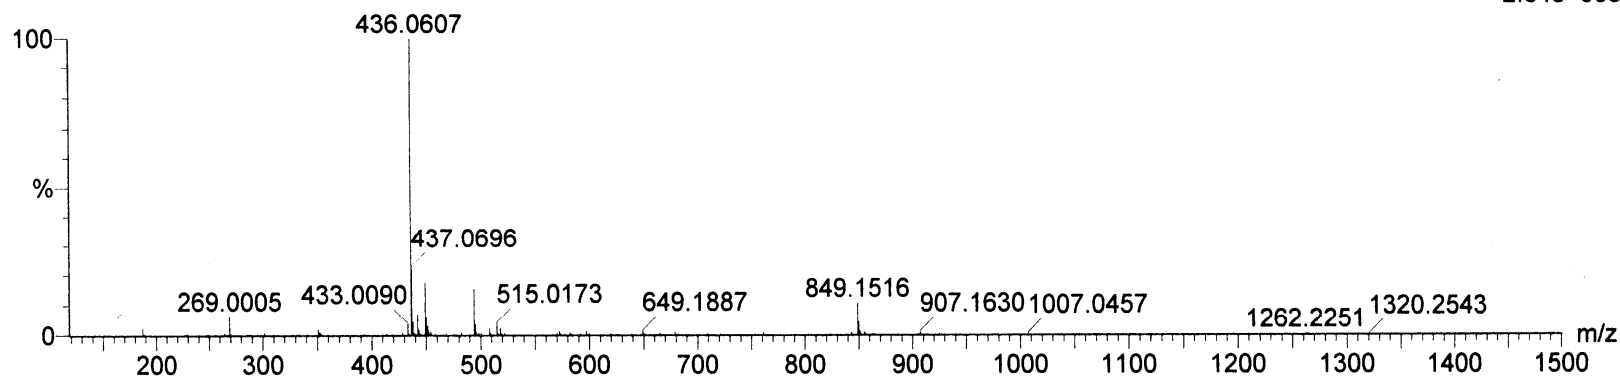

Minimum: -1.5  
Maximum: 5.0 50.0 150.0

| Mass     | Calc. Mass | mDa  | PPM  | DBE  | i-FIT | Formula            |
|----------|------------|------|------|------|-------|--------------------|
| 436.0607 | 436.0620   | -1.3 | -3.0 | 10.5 | 5.3   | C18 H14 N 07 F3 Na |

## Elemental Composition Report

### Single Mass Analysis (displaying only valid results)

Tolerance = 5.0 PPM / DBE: min = -200.0, max = 200.0

Selected filters: None

Monoisotopic Mass, Even Electron Ions

20 formula(e) evaluated with 1 results within limits (all results (up to 1000) for each mass)

Elements Used:

C: 0-120 1H: 0-120 2H: 6-6 N: 1-1 O: 7-7 Na: 1-1

CQX-1

13032811 45 (0.837) AM (Cen,2, 80.00, Ht,5000.0,0.00,1.00); Sm (Mn, 2x1.00); Cm (41:47)

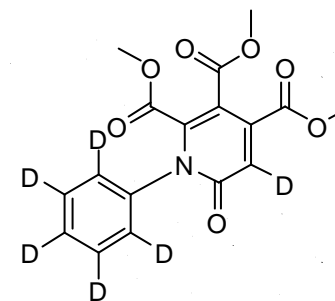

11:16:36  
1: TOF MS ES+  
2.32e3

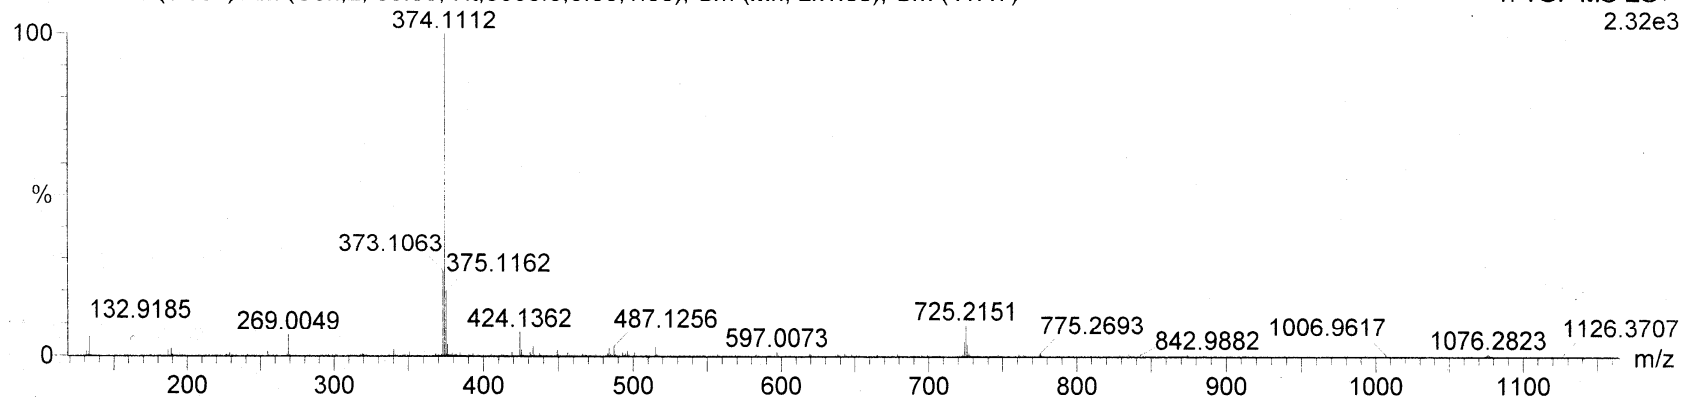

Minimum: -200.0  
Maximum: 5.0 5.0 200.0

| Mass     | Calc. Mass | mDa  | PPM  | DBE  | i-FIT    | Formula             |
|----------|------------|------|------|------|----------|---------------------|
| 374.1112 | 374.1123   | -1.1 | -2.9 | 10.5 | 188757.8 | C17 1H9 2H6 N O7 Na |

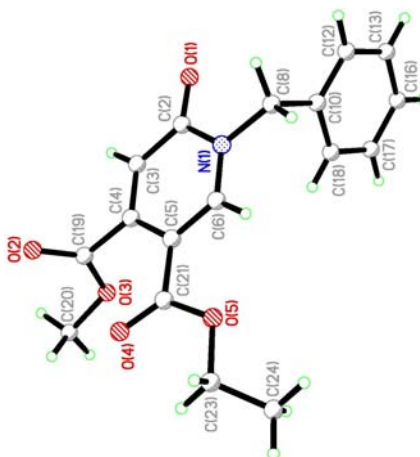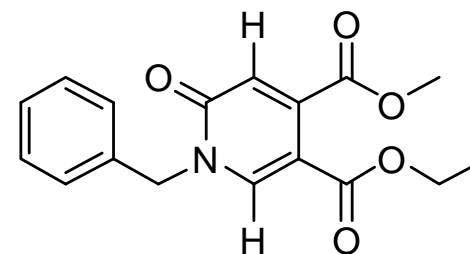

4aq

( CCDC 935076)

We used the slow evaporation method to grow the crystals of **4aq**. We first prepared a saturated solution of compound **4aq**, employing petroleum ether/ethyl acetate (4:1, v/v) as the solvent. Then the solution was transferred to a clean bottle and covered, with a few small holes in the cover. After that the bottle was placed in a quiet out of the way place. A few days later, the crystals of **4aq** were obtained. CCDC (**4aq**) contain the supplementary crystallographic data for this paper. These data can be obtained free of charge from The Cambridge Crystallographic Data Centre via [www.ccdc.cam.ac.uk/data\\_request/cif](http://www.ccdc.cam.ac.uk/data_request/cif).
